# Supplementary material for: Hyaluronan catabolism supports the peritoneal disseminated metastasis of cancer through the glucuronic acid pathway
Source: Research Square preprint supplement (doi:10.21203/rs.3.rs-7691213/v1), 2025-11-19
Supplement: Supplementary file 1 [file 13eb6793b1b2881c52387cf7.xlsx]

## Sheet: MAGeCK (intesitines vs primary)
Supplementary Table 1. Genes with sgRNA(s) enriched in the primary OC xenograft cells
Gene ID	Score	P value	FDR	Good sgRNA number	Log2 (fold change, Dissminated/Primary OC)
hsa-mir-6715a	0.023586	0.059816	0.97144	3	-4.3202
hsa-mir-6715b	0.023586	0.059816	0.97144	3	-4.3202
GABRB1	0.01239	0.023273	0.957289	2	-8.1757
NOD1	0.035153	0.063727	0.97144	2	-6.9407
PDE4A	0.0012875	0.0025336	0.894101	2	-5.9018
LAYN	0.002836	0.0055047	0.894101	2	-5.8312
SULT1E1	0.014248	0.026676	0.957289	2	-5.6372
NBL1	0.0045385	0.0086575	0.894101	2	-5.6038
C1orf151-NBL1	0.0045385	0.0086575	0.894101	2	-5.6038
GLB1L2	0.0036728	0.0070742	0.894101	2	-5.6006
PMP22	0.034878	0.063221	0.97144	2	-5.0998
SSBP2	0.19702	0.30556	0.973807	2	-5.0018
MEOX2	0.018344	0.034046	0.957289	2	-5.0016
hsa-mir-6083	0.055508	0.098119	0.973807	2	-4.9132
hsa-mir-3689b	0.023803	0.043773	0.961961	2	-4.7907
GOLGA2	0.061434	0.10773	0.973807	2	-4.7102
MGAT1	0.071113	0.12349	0.973807	2	-4.5111
ACAD9	0.065526	0.11447	0.973807	2	-4.3883
CCL19	0.070971	0.12326	0.973807	2	-4.1964
RBFOX1	0.072762	0.12617	0.973807	2	-4.1821
COMMD6	0.093775	0.16008	0.973807	2	-4.0685
hsa-mir-146b	0.068991	0.1201	0.973807	2	-4.0347
TICRR	0.0041384	0.0079322	0.894101	2	-3.8594
ZNF213	0.079471	0.13688	0.973807	2	-3.7712
CDH15	0.0073035	0.013749	0.894101	2	-3.7539
RBP4	0.0018914	0.0050894	0.894101	2	-3.7523
ACSM1	0.0037978	0.010325	0.894101	2	-3.442
AGBL3	0.0020949	0.0041047	0.894101	2	-3.3406
DDX23	0.005248	0.014045	0.894101	2	-3.3396
hsa-mir-1285-1	0.015309	0.028553	0.957289	2	-3.295
hsa-mir-3689e	0.021806	0.04015	0.961961	2	-3.2494
FREM3	0.013193	0.02471	0.957289	2	-3.1363
COL27A1	0.014514	0.027136	0.957289	2	-3.1308
C19orf44	0.021984	0.040489	0.961961	2	-3.1293
hsa-mir-647	0.0066998	0.012685	0.894101	2	-3.0703
KCNA4	0.010059	0.018861	0.950684	2	-3.0454
ANKRD29	0.029237	0.053263	0.961961	2	-3.028
ZNF292	0.010602	0.01985	0.957289	2	-3.0124
SLC26A7	0.018109	0.04653	0.961961	2	-2.9222
LTA4H	0.0086634	0.01627	0.894101	2	-2.9164
PLEKHB1	0.0081248	0.015238	0.894101	2	-2.8916
C9orf47	0.016544	0.030875	0.957289	2	-2.8724
hsa-mir-3914-2	0.014611	0.027287	0.957289	2	-2.8356
hsa-mir-516a-2	0.021335	0.03929	0.961961	2	-2.7892
GNG4	0.029328	0.053422	0.961961	2	-2.7786
TDRD3	0.02824	0.05155	0.961961	2	-2.6955
C10orf82	0.023067	0.042496	0.961961	2	-2.6818
IRS1	0.021691	0.055257	0.96588	2	-2.6718
MPP3	0.019521	0.036043	0.961503	2	-2.6588
PLEKHN1	0.025867	0.047324	0.961961	2	-2.6575
hsa-mir-4999	0.032523	0.059077	0.97144	2	-2.6254
RRP9	0.056934	0.10047	0.973807	2	-2.5973
NAA25	0.025996	0.047542	0.961961	2	-2.5805
PLK3	0.064436	0.11273	0.973807	2	-2.5678
UBR5	0.039888	0.071932	0.973204	2	-2.5452
hsa-mir-516a-1	0.021335	0.03929	0.961961	2	-2.542
FASN	0.044048	0.078822	0.973807	2	-2.5336
TMEM222	0.036675	0.066364	0.97144	2	-2.514
GOLGA6A	0.024677	0.045245	0.961961	2	-2.511
hsa-mir-409	0.030158	0.054884	0.961961	2	-2.4991
IMP3	0.043222	0.077471	0.973807	2	-2.4986
KISS1	0.0408	0.073451	0.973807	2	-2.4913
STON1-GTF2A1L	0.027904	0.050948	0.961961	2	-2.4638
STON1	0.027904	0.050948	0.961961	2	-2.4638
EFCAB13	0.029558	0.053837	0.961961	2	-2.4632
OR5B12	0.026515	0.048463	0.961961	2	-2.4616
hsa-mir-4490	0.19344	0.30086	0.973807	2	-2.4269
LMTK3	0.03548	0.064321	0.97144	2	-2.4236
SUCLG1	0.0291	0.053033	0.961961	2	-2.4142
OR2C1	0.045918	0.081975	0.973807	2	-2.4008
SUPT7L	0.039675	0.071563	0.973204	2	-2.37
MBOAT2	0.036647	0.066308	0.97144	2	-2.3258
PMP2	0.061022	0.10705	0.973807	2	-2.3238
ZNF319	0.061485	0.10781	0.973807	2	-2.2932
OR51A2	0.049895	0.088665	0.973807	2	-2.2616
ZNF76	0.066143	0.11548	0.973807	2	-2.2553
MIEN1	0.046263	0.082557	0.973807	2	-2.2455
IL21R	0.088929	0.15234	0.973807	2	-2.2425
hsa-mir-4453	0.067122	0.1171	0.973807	2	-2.2386
DHX57	0.069413	0.12075	0.973807	2	-2.2363
SYNE3	0.05984	0.10516	0.973807	2	-2.1934
MEA1	0.071756	0.12449	0.973807	2	-2.188
PET117	0.049597	0.088157	0.973807	2	-2.1794
hsa-mir-106a	0.052251	0.092636	0.973807	2	-2.163
POTEB	0.076153	0.1315	0.973807	2	-2.0913
LOC100287399	0.076153	0.1315	0.973807	2	-2.0913
LOC100996331	0.076153	0.1315	0.973807	2	-2.0913
POTEB2	0.076153	0.1315	0.973807	2	-2.0913
POTEH	0.076153	0.1315	0.973807	2	-2.088
POTEF	0.076153	0.1315	0.973807	2	-2.088
POTEM	0.076153	0.1315	0.973807	2	-2.088
POTEJ	0.076153	0.1315	0.973807	2	-2.088
POTEE	0.076153	0.1315	0.973807	2	-2.088
HAO2	0.072474	0.12568	0.973807	2	-2.033
ADH5	0.073557	0.12742	0.973807	2	-2.0235
TBC1D4	0.13556	0.22361	0.973807	2	-2.0091
GPR33	0.033496	0.079874	0.973807	2	-1.9818
LILRB3	0.069484	0.12084	0.973807	2	-1.9412
PIP5K1B	0.072546	0.12582	0.973807	2	-1.8335
TAOK2	0.066763	0.11652	0.973807	2	-1.7892
HS3ST1	0.094185	0.16075	0.973807	2	-1.7261
VCX3B	0.092674	0.15834	0.973807	2	-1.6943
C11orf52	0.078046	0.13455	0.973807	2	-1.6337
POTEI	0.18643	0.29145	0.973807	2	-1.5118
PHOX2A	0.084366	0.14481	0.973807	2	-1.4434
MPHOSPH6	0.090933	0.1556	0.973807	2	-1.285
EFCAB2	6.6818e-05	6.6414e-05	0.430693	1	-10.708
HOXD9	0.00020045	0.00019619	0.636139	1	-10.645
TSNAX	0.00086864	0.00088628	0.894101	1	-10.251
CTAGE15	0.0010691	0.0010588	0.894101	1	-10.179
CTAGE6	0.0010691	0.0010588	0.894101	1	-10.179
PHLDB2	0.0012695	0.0012481	0.894101	1	-10.148
BAG1	0.0016705	0.0016329	0.894101	1	-10.082
NME1	0.0019377	0.0019413	0.894101	1	-9.8725
SCIN	0.0024723	0.002494	0.894101	1	-9.7287
PLAC8	0.0026059	0.0026237	0.894101	1	-9.7147
SF3B2	0.0035414	0.003494	0.894101	1	-9.5016
KRTAP20-3	0.0039423	0.0038726	0.894101	1	-9.4347
KCNK7	0.0050114	0.0049444	0.894101	1	-9.3082
USPL1	0.0052786	0.0052039	0.894101	1	-9.2886
AP1M2	0.0054123	0.005352	0.894101	1	-9.2659
LYAR	0.0056795	0.0056085	0.894101	1	-9.2257
DHRS3	0.0068823	0.006804	0.894101	1	-9.1193
NUPL1	0.0074168	0.0073093	0.894101	1	-9.0843
MAPK6	0.0082186	0.0080834	0.894101	1	-9.0249
SERPINA9	0.0083523	0.0081842	0.894101	1	-9.0155
S100A7	0.0086195	0.0084269	0.894101	1	-8.9813
PNMA1	0.0087532	0.0085658	0.894101	1	-8.9727
MED28	0.0090204	0.0088376	0.894101	1	-8.9687
CCDC42	0.0091541	0.008975	0.894101	1	-8.9595
hsa-mir-920	0.0092877	0.009117	0.894101	1	-8.9485
TXN2	0.009555	0.0093949	0.894101	1	-8.9222
USP9X	0.010223	0.010085	0.894101	1	-8.8807
EEF1A2	0.01049	0.010341	0.894101	1	-8.8518
NFKBID	0.011426	0.011221	0.894101	1	-8.7941
hsa-mir-1915	0.01156	0.011364	0.894101	1	-8.7935
HDAC8	0.011827	0.011648	0.894101	1	-8.7883
DHODH	0.012629	0.01245	0.894101	1	-8.7661
PITHD1	0.013297	0.013155	0.894101	1	-8.693
BCL11B	0.013564	0.013384	0.894101	1	-8.6889
UAP1L1	0.013698	0.013508	0.894101	1	-8.6805
ETNK1	0.013831	0.013645	0.894101	1	-8.6735
TMEM38A	0.015034	0.014874	0.894101	1	-8.6401
PCDHGA10	0.016638	0.016545	0.894101	1	-8.6386
PCDHGB5	0.016638	0.016545	0.894101	1	-8.6386
PCDHGC4	0.016638	0.016545	0.894101	1	-8.6386
PCDHGA6	0.016638	0.016545	0.894101	1	-8.6386
PCDHGC3	0.016638	0.016545	0.894101	1	-8.6386
PCDHGB4	0.016638	0.016545	0.894101	1	-8.6386
PCDHGA1	0.016638	0.016545	0.894101	1	-8.6386
PCDHGB3	0.016638	0.016545	0.894101	1	-8.6386
PCDHGB6	0.016638	0.016545	0.894101	1	-8.6386
PCDHGB1	0.016638	0.016545	0.894101	1	-8.6386
PCDHGA5	0.016638	0.016545	0.894101	1	-8.6386
PCDHGA12	0.016638	0.016545	0.894101	1	-8.6386
PCDHGA2	0.016638	0.016545	0.894101	1	-8.6386
PCDHGB2	0.016638	0.016545	0.894101	1	-8.6386
PCDHGA9	0.016638	0.016545	0.894101	1	-8.6386
PCDHGA8	0.016638	0.016545	0.894101	1	-8.6386
PCDHGC5	0.016638	0.016545	0.894101	1	-8.6386
PCDHGB7	0.016638	0.016545	0.894101	1	-8.6386
PCDHGA7	0.016638	0.016545	0.894101	1	-8.6386
C14orf119	0.018108	0.018035	0.945545	1	-8.6249
hsa-mir-5689	0.018241	0.018158	0.945545	1	-8.6161
BPIFA3	0.022117	0.022134	0.957289	1	-8.4397
IMMP2L	0.022651	0.022658	0.957289	1	-8.4037
hsa-mir-7155	0.022919	0.022901	0.957289	1	-8.3858
FANCL	0.023186	0.023166	0.957289	1	-8.3763
TNFRSF12A	0.02372	0.02367	0.957289	1	-8.3475
MYH14	0.024255	0.024218	0.957289	1	-8.3351
CRTAC1	0.024522	0.024435	0.957289	1	-8.3253
LIMCH1	0.02499	0.024969	0.957289	1	-8.3199
ELMO2	0.02499	0.024969	0.957289	1	-8.3199
hsa-mir-181c	0.025725	0.02571	0.957289	1	-8.2927
BEGAIN	0.026126	0.026102	0.957289	1	-8.2631
STRADB	0.027195	0.02722	0.957289	1	-8.2118
GJB2	0.028398	0.028414	0.957289	1	-8.1883
FAM19A1	0.028799	0.028762	0.957289	1	-8.1695
RAB15	0.029066	0.029082	0.957289	1	-8.1575
POLA1	0.030269	0.030272	0.957289	1	-8.1301
NBEAL2	0.031338	0.031408	0.957289	1	-8.1105
COMMD2	0.032674	0.032806	0.957289	1	-8.0758
MYO10	0.033209	0.033318	0.957289	1	-8.0565
hsa-mir-1299	0.033877	0.033985	0.957289	1	-8.0337
MIF4GD	0.034411	0.034533	0.959431	1	-8.0227
LOC100130370	0.034679	0.034811	0.959431	1	-8.0194
SAFB	0.036149	0.036254	0.961503	1	-7.9949
IL9R_Y	0.036349	0.036473	0.961503	1	-7.9937
IL9R_X	0.036349	0.036473	0.961503	1	-7.9937
PCGF1	0.038287	0.038431	0.961961	1	-7.9515
CHTF8	0.038554	0.038721	0.961961	1	-7.9491
ASB18	0.038688	0.03886	0.961961	1	-7.948
AGPHD1	0.038955	0.039118	0.961961	1	-7.9433
HIST1H2BL	0.03949	0.039596	0.961961	1	-7.9363
PTPN2	0.044701	0.04479	0.961961	1	-7.8716
TTC1	0.04684	0.046916	0.961961	1	-7.828
OR13H1	0.047641	0.047703	0.961961	1	-7.8153
CD1D	0.049913	0.050103	0.961961	1	-7.7883
C8A	0.050448	0.050593	0.961961	1	-7.7792
MYBPHL	0.050581	0.050723	0.961961	1	-7.7779
TEFM	0.051049	0.051159	0.961961	1	-7.774
TRPM2	0.051049	0.051159	0.961961	1	-7.774
RNF168	0.051383	0.051489	0.961961	1	-7.77
COPS3	0.052185	0.052266	0.961961	1	-7.7488
GUF1	0.052452	0.052513	0.961961	1	-7.7422
SMARCA4	0.054189	0.054228	0.961961	1	-7.7192
LOC100862671	0.056194	0.056207	0.97144	1	-7.7027
LCE2A	0.057397	0.057428	0.97144	1	-7.6833
hsa-mir-4532	0.058199	0.058194	0.97144	1	-7.6735
ADSSL1	0.064479	0.064364	0.97144	1	-7.6044
ASIC2	0.064747	0.064643	0.97144	1	-7.6
NSA2	0.067954	0.067847	0.972677	1	-7.5761
TNRC6B	0.0737	0.073499	0.973807	1	-7.5287
EIF5A2	0.074502	0.074282	0.973807	1	-7.5224
ME3	0.077977	0.07787	0.973807	1	-7.4925
hsa-mir-5690	0.080649	0.080476	0.973807	1	-7.4716
NMNAT1	0.084525	0.084284	0.973807	1	-7.4455
HMGCS2	0.085861	0.085562	0.973807	1	-7.4422
SETX	0.089269	0.088939	0.973807	1	-7.4155
hsa-mir-4705	0.092409	0.092116	0.973807	1	-7.3832
MCOLN2	0.093612	0.093316	0.973807	1	-7.3781
PLA2G4E	0.099091	0.09871	0.973807	1	-7.3431
PTGDR2	0.0057381	0.010941	0.894101	1	-7.3318
C2orf71	0.1023	0.10188	0.973807	1	-7.3182
INSRR	0.10283	0.10241	0.973807	1	-7.3164
OGFOD1	0.1041	0.10362	0.973807	1	-7.3109
FAM50A	0.1041	0.10362	0.973807	1	-7.3109
C9orf173	0.10444	0.10397	0.973807	1	-7.3073
SPIN2A	0.10631	0.10585	0.973807	1	-7.2928
NUDT5	0.10831	0.10787	0.973807	1	-7.2854
EPX	0.10938	0.10898	0.973807	1	-7.2799
MST1	0.11406	0.11359	0.973807	1	-7.2632
AEN	0.11526	0.11477	0.973807	1	-7.2538
UQCRQ	0.12061	0.1201	0.973807	1	-7.2272
NFE2L2	0.12622	0.12579	0.973807	1	-7.1982
CA8	0.12736	0.12693	0.973807	1	-7.1943
CPN1	0.12889	0.12844	0.973807	1	-7.1903
NACC2	0.1317	0.1313	0.973807	1	-7.1706
PNMT	0.13571	0.13529	0.973807	1	-7.1464
SERTAD1	0.13771	0.13726	0.973807	1	-7.1363
LRRC14B	0.14466	0.14436	0.973807	1	-7.0991
TNK2	0.14653	0.14623	0.973807	1	-7.0907
hsa-mir-3131	0.15101	0.15076	0.973807	1	-7.0716
hsa-mir-183	0.15161	0.15134	0.973807	1	-7.0673
FARS2	0.15241	0.15211	0.973807	1	-7.0652
RHAG	0.15949	0.15914	0.973807	1	-7.0327
SHC1	0.1611	0.1607	0.973807	1	-7.0239
PITPNB	0.16885	0.16848	0.973807	1	-6.9813
KCND2	0.17032	0.16987	0.973807	1	-6.9745
DZIP1L	0.17172	0.1713	0.973807	1	-6.963
NFAT5	0.17219	0.17179	0.973807	1	-6.9607
PA2G4	0.17526	0.17487	0.973807	1	-6.9445
SRI	0.1786	0.17825	0.973807	1	-6.9281
SNX7	0.18048	0.18004	0.973807	1	-6.9163
PCBP3	0.18168	0.1812	0.973807	1	-6.9067
TOMM20L	0.18903	0.18854	0.973807	1	-6.8679
LYZL1	0.19304	0.19258	0.973807	1	-6.8381
RAB3IL1	0.19344	0.19295	0.973807	1	-6.8356
MS4A12	0.19624	0.19567	0.973807	1	-6.8179
THUMPD1	0.19771	0.19713	0.973807	1	-6.8128
ERAS	0.19892	0.19823	0.973807	1	-6.8077
IL7R	0.19939	0.1987	0.973807	1	-6.8051
C17orf80	0.19939	0.1987	0.973807	1	-6.8051
CMPK1	0.20106	0.20041	0.973807	1	-6.7923
UBN1	0.20393	0.20322	0.973807	1	-6.7766
EXD3	0.2048	0.20411	0.973807	1	-6.7688
IGDCC3	0.20727	0.20653	0.973807	1	-6.7582
CNIH2	0.20727	0.20653	0.973807	1	-6.7582
CBR4	0.20827	0.2075	0.973807	1	-6.7529
hsa-mir-510	0.20947	0.20865	0.973807	1	-6.7422
ARMC12	0.21195	0.21117	0.973807	1	-6.7233
ZNF99	0.21195	0.21117	0.973807	1	-6.7233
GPHA2	0.21442	0.21359	0.973807	1	-6.7041
CD84	0.21482	0.21399	0.973807	1	-6.7014
SERPINI1	0.22538	0.22457	0.973807	1	-6.6336
CPNE5	0.22618	0.22538	0.973807	1	-6.6249
ACSF2	0.22618	0.22538	0.973807	1	-6.6249
SYCN	0.22952	0.22873	0.973807	1	-6.5866
EIF3B	0.23166	0.23093	0.973807	1	-6.5686
NT5M	0.23299	0.2323	0.973807	1	-6.5564
MYO15A	0.2342	0.2335	0.973807	1	-6.5472
EZH2	0.2346	0.23386	0.973807	1	-6.5442
MOGS	0.0065375	0.012377	0.894101	1	-6.539
CLDN9	0.2356	0.23485	0.973807	1	-6.538
XKRY	0.23734	0.23665	0.973807	1	-6.5225
XKRY2	0.23734	0.23665	0.973807	1	-6.5225
TPD52L3	0.23941	0.2388	0.973807	1	-6.4909
SPON2	0.23968	0.23906	0.973807	1	-6.4877
ITGAD	0.24275	0.24211	0.973807	1	-6.4586
MAP1LC3C	0.24596	0.24537	0.973807	1	-6.4256
AKTIP	0.25144	0.25083	0.973807	1	-6.3781
hsa-mir-4716	0.25317	0.25253	0.973807	1	-6.3642
ETHE1	0.25337	0.25272	0.973807	1	-6.3607
ANKDD1B	0.25337	0.25272	0.973807	1	-6.3607
POLM	0.25438	0.25367	0.973807	1	-6.3432
ARHGEF12	0.25812	0.25763	0.973807	1	-6.3001
C9orf66	0.25945	0.25895	0.973807	1	-6.2855
RNF123	0.26079	0.26027	0.973807	1	-6.2781
MYO1G	0.26133	0.26084	0.973807	1	-6.2707
ZBTB1	0.26213	0.26164	0.973807	1	-6.2595
TSR2	0.26246	0.26195	0.973807	1	-6.2557
TFDP1	0.26246	0.26195	0.973807	1	-6.2557
OXNAD1	0.2628	0.26231	0.973807	1	-6.252
CDKL5	0.26333	0.26287	0.973807	1	-6.2444
TBC1D31	0.2652	0.2648	0.973807	1	-6.2253
RHBDF2	0.26594	0.26555	0.973807	1	-6.2176
TMEM217	0.26594	0.26555	0.973807	1	-6.2176
CRNN	0.26894	0.26858	0.973807	1	-6.1786
GSG1	0.26988	0.26947	0.973807	1	-6.1666
TMEM134	0.27175	0.27136	0.973807	1	-6.1343
ZFAND2B	0.27309	0.27272	0.973807	1	-6.1178
ETV4	0.27389	0.27352	0.973807	1	-6.1137
MLH3	0.27696	0.27662	0.973807	1	-6.0886
TOP2A	0.27803	0.27761	0.973807	1	-6.0674
FAM120C	0.2787	0.27827	0.973807	1	-6.0631
NKAPL	0.2795	0.27903	0.973807	1	-6.0501
KRT13	0.2799	0.27945	0.973807	1	-6.0458
TPD52L2	0.28211	0.28156	0.973807	1	-6.0239
hsa-mir-4803	0.28351	0.2829	0.973807	1	-6.0017
MRGPRX1	0.28458	0.28394	0.973807	1	-5.9746
NDUFV3	0.28565	0.28506	0.973807	1	-5.9515
PEX11A	0.28625	0.28566	0.973807	1	-5.9422
GCN1L1	0.28625	0.28566	0.973807	1	-5.9422
CIZ1	0.29032	0.28968	0.973807	1	-5.9187
PPCDC	0.29113	0.29045	0.973807	1	-5.914
EDF1	0.29233	0.29158	0.973807	1	-5.8996
DAB2	0.29393	0.29323	0.973807	1	-5.8851
hsa-mir-3529	0.29494	0.29431	0.973807	1	-5.8655
CCNB1IP1	0.29674	0.29608	0.973807	1	-5.8307
ALYREF	0.29701	0.29636	0.973807	1	-5.8205
CDKN3	0.29774	0.29712	0.973807	1	-5.8052
PLCXD1_X	0.29774	0.29712	0.973807	1	-5.8052
hsa-mir-6868	0.29774	0.29712	0.973807	1	-5.8052
PLCXD1_Y	0.29774	0.29712	0.973807	1	-5.8052
SIPA1L3	0.29848	0.29784	0.973807	1	-5.7949
IL32	0.29894	0.29831	0.973807	1	-5.7845
C2orf88	0.29894	0.29831	0.973807	1	-5.7845
GPR32	0.29995	0.29936	0.973807	1	-5.7688
GATM	0.30055	0.29999	0.973807	1	-5.7583
PCID2	0.30055	0.29999	0.973807	1	-5.7583
GARS	0.30095	0.30036	0.973807	1	-5.7529
SDCCAG3	0.30095	0.30036	0.973807	1	-5.7529
hsa-mir-6826	0.30128	0.30069	0.973807	1	-5.7423
ERI3	0.30242	0.30184	0.973807	1	-5.7206
RNF169	0.30242	0.30184	0.973807	1	-5.7206
NOP10	0.30275	0.30213	0.973807	1	-5.7152
OR7G1	0.30322	0.30259	0.973807	1	-5.7097
hsa-mir-1178	0.30322	0.30259	0.973807	1	-5.7097
ANO8	0.30509	0.30454	0.973807	1	-5.6708
hsa-mir-3189	0.30509	0.30454	0.973807	1	-5.6708
ZWINT	0.30556	0.30496	0.973807	1	-5.6652
LRRC7	0.30643	0.30579	0.973807	1	-5.6538
SLC41A1	0.30643	0.30579	0.973807	1	-5.6538
EIF4G2	0.30703	0.30643	0.973807	1	-5.6423
P2RX3	0.30723	0.30663	0.973807	1	-5.6308
GPRC5D	0.30723	0.30663	0.973807	1	-5.6308
DYDC2	0.30743	0.30683	0.973807	1	-5.625
TIMM44	0.15627	0.20866	0.973807	1	-5.6127
RGPD2	0.3083	0.30762	0.973807	1	-5.6074
RGPD1	0.3083	0.30762	0.973807	1	-5.6074
RANBP2	0.3083	0.30762	0.973807	1	-5.6074
PCDHGA11	0.032999	0.059967	0.97144	1	-5.5843
CASP8AP2	0.30943	0.30878	0.973807	1	-5.5717
MTMR1	0.0014695	0.0028909	0.894101	1	-5.5491
PLTP	0.0014032	0.0013916	0.894101	1	-5.5455
ZNF493	0.0030713	0.0059536	0.894101	1	-5.468
LZTFL1	0.0018041	0.0017764	0.894101	1	-5.3584
HBD	0.00033409	0.00032596	0.70462	1	-5.3216
DOCK7	0.40842	0.41443	0.973807	1	-5.3205
NDUFA9	0.00093523	0.0018466	0.894101	1	-5.2464
hsa-mir-6884	0.0027395	0.0027306	0.894101	1	-5.0937
DENND2D	0.0030068	0.0029978	0.894101	1	-5.0821
PRPS2	0.0031405	0.0031199	0.894101	1	-5.0062
NALCN	0.48463	0.48559	0.973807	1	-4.9902
NF1	0.012124	0.022801	0.957289	1	-4.964
LRRC30	0.0034077	0.0033718	0.894101	1	-4.9625
EIF2B4	0.051049	0.090591	0.973807	1	-4.9355
MTA2	0.003675	0.0036192	0.894101	1	-4.927
HDDC3	0.23019	0.26557	0.973807	1	-4.9001
PCDHGA3	0.032999	0.059967	0.97144	1	-4.886
DEFB132	0.0040759	0.004007	0.894101	1	-4.8045
NBPF3	0.0043432	0.0042589	0.894101	1	-4.7867
RPS15	0.33983	0.35514	0.973807	1	-4.7507
ZNF687	0.0047441	0.0046513	0.894101	1	-4.7429
hsa-mir-760	0.0169	0.031539	0.957289	1	-4.7374
CHRND	0.005145	0.0050787	0.894101	1	-4.694
hsa-mir-650	0.0055459	0.0054788	0.894101	1	-4.6643
PREX2	0.006615	0.006549	0.894101	1	-4.5505
EME2	0.0067486	0.0066696	0.894101	1	-4.5487
ATF2	0.0075504	0.0074086	0.894101	1	-4.525
ELL	0.0070159	0.00692	0.894101	1	-4.5221
TNKS2	0.0078177	0.0076727	0.894101	1	-4.4859
MLXIPL	0.43263	0.4365	0.973807	1	-4.4744
CXCL9	0.008085	0.0079719	0.894101	1	-4.4721
PTPN3	0.0079514	0.0078177	0.894101	1	-4.4492
CREG2	0.0012024	0.0023611	0.894101	1	-4.4076
OR4K17	0.0088868	0.0087048	0.894101	1	-4.397
TEC	0.23767	0.2715	0.973807	1	-4.3881
OR5B2	0.0094214	0.0092559	0.894101	1	-4.3614
SNAPC3	0.01009	0.0099659	0.894101	1	-4.3175
CIB3	0.010357	0.010213	0.894101	1	-4.2952
SMIM20	0.010758	0.010583	0.894101	1	-4.2712
TMEM55A	0.011025	0.010844	0.894101	1	-4.2638
hsa-mir-592	0.010624	0.010479	0.894101	1	-4.2629
hsa-mir-4717	0.51478	0.51512	0.9951	1	-4.2526
NDNL2	0.011159	0.010952	0.894101	1	-4.2436
DPF3	0.011693	0.011508	0.894101	1	-4.2302
hsa-mir-566	0.012228	0.012048	0.894101	1	-4.2173
GPR156	0.012495	0.01232	0.894101	1	-4.2079
hsa-mir-941-1	0.012094	0.011908	0.894101	1	-4.2078
C2orf82	0.012762	0.012586	0.894101	1	-4.1787
KLF11	0.01303	0.012867	0.894101	1	-4.1694
hsa-mir-3646	0.012896	0.012723	0.894101	1	-4.1562
LIFR	0.02457	0.045075	0.961961	1	-4.1527
SHFM1	0.013163	0.013015	0.894101	1	-4.1265
CTBS	0.12355	0.18412	0.973807	1	-4.11
AFAP1	0.013965	0.013784	0.894101	1	-4.0982
FOXO1	0.014232	0.014068	0.894101	1	-4.0961
RNF152	0.014366	0.014178	0.894101	1	-4.0898
SLC39A6	0.014633	0.014444	0.894101	1	-4.0898
NEUROD1	0.0149	0.014734	0.894101	1	-4.0891
SLC22A5	0.47779	0.47908	0.973807	1	-4.0746
EIF4E1B	0.0145	0.014302	0.894101	1	-4.0722
OR4K13	0.015168	0.015033	0.894101	1	-4.0668
NRD1	0.018776	0.01874	0.950684	1	-4.0289
HIST2H2AC	0.018642	0.0186	0.950684	1	-4.0283
hsa-mir-6511b-1	0.0090666	0.016992	0.903222	1	-4.0216
hsa-mir-6511b-2	0.0090666	0.016992	0.903222	1	-4.0216
MCF2L2	0.019043	0.019061	0.950684	1	-4.0029
SLC38A1	0.019177	0.019204	0.950684	1	-3.9943
KIF15	0.01891	0.018913	0.950684	1	-3.9888
OPRM1	0.020246	0.02029	0.957289	1	-3.98
ANXA9	0.02038	0.020412	0.957289	1	-3.9785
KIAA0753	0.020112	0.020151	0.957289	1	-3.9775
TFAP2C	0.020647	0.020652	0.957289	1	-3.9684
CYTL1	0.021048	0.021032	0.957289	1	-3.9608
F2RL3	0.02078	0.020768	0.957289	1	-3.9598
FGGY	0.020914	0.020902	0.957289	1	-3.9588
TMEM213	0.020513	0.020516	0.957289	1	-3.9553
TMPRSS11D	0.021181	0.021152	0.957289	1	-3.9369
hsa-mir-548f-1	0.021449	0.021417	0.957289	1	-3.9277
ZC3H3	0.021582	0.021559	0.957289	1	-3.9207
DYNLT3	0.021716	0.021704	0.957289	1	-3.8907
ANKRD13B	0.02225	0.022275	0.957289	1	-3.8787
GABRR2	0.022384	0.02241	0.957289	1	-3.8613
PRR18	0.038248	0.069092	0.972677	1	-3.8443
RAB9A	0.023453	0.023415	0.957289	1	-3.8185
ALDH3A1	0.023052	0.023023	0.957289	1	-3.804
SAMD9	0.073822	0.12787	0.973807	1	-3.7988
OR2T11	0.023988	0.023949	0.957289	1	-3.7838
HAUS6	0.024121	0.024072	0.957289	1	-3.7774
STK19	0.023854	0.0238	0.957289	1	-3.7704
USP29	0.024389	0.024328	0.957289	1	-3.7694
CD200	0.0084014	0.01581	0.894101	1	-3.7561
VPS45	0.024656	0.024563	0.957289	1	-3.7517
PSG8	0.02479	0.024739	0.957289	1	-3.7508
OR10C1	0.025591	0.025575	0.957289	1	-3.7464
GOLPH3L	0.02519	0.025192	0.957289	1	-3.7436
UACA	0.46066	0.46284	0.973807	1	-3.7401
hsa-mir-548q	0.12381	0.12335	0.973807	1	-3.7358
ADORA3	0.13317	0.13271	0.973807	1	-3.7122
PITPNA	0.026393	0.026421	0.957289	1	-3.7044
GABRD	0.02626	0.026252	0.957289	1	-3.7018
IL31	0.026527	0.026549	0.957289	1	-3.691
hsa-mir-564	0.02666	0.026705	0.957289	1	-3.6843
NLGN3	0.026794	0.026815	0.957289	1	-3.6841
ZNF318	0.026928	0.026946	0.957289	1	-3.6729
TMSB15B	0.027061	0.027093	0.957289	1	-3.6621
PTGER4	0.027462	0.027432	0.957289	1	-3.6559
NISCH	0.15869	0.15833	0.973807	1	-3.6483
CTDNEP1	0.027596	0.027571	0.957289	1	-3.6451
TRPV5	0.027997	0.028008	0.957289	1	-3.644
RNF215	0.02773	0.027725	0.957289	1	-3.6421
PRX	0.16765	0.16725	0.973807	1	-3.625
CCDC36	0.027863	0.027855	0.957289	1	-3.6248
PDGFD	0.028264	0.028281	0.957289	1	-3.6204
RGS5	0.028665	0.028659	0.957289	1	-3.6187
hsa-mir-6875	0.50354	0.50414	0.99375	1	-3.6173
ZNF740	0.17172	0.1713	0.973807	1	-3.6124
ALAS2	0.029333	0.029339	0.957289	1	-3.6024
PYHIN1	0.0292	0.029226	0.957289	1	-3.6016
ANGPTL6	0.0296	0.029612	0.957289	1	-3.5946
ZSCAN21	0.028932	0.028904	0.957289	1	-3.5901
GUCY2C	0.029734	0.029769	0.957289	1	-3.5813
ZNF584	0.029868	0.029887	0.957289	1	-3.5812
RTKN2	0.030402	0.030426	0.957289	1	-3.5775
NAA30	0.03067	0.030724	0.957289	1	-3.5738
AQP8	0.030803	0.030853	0.957289	1	-3.5636
FKBP3	0.031471	0.03155	0.957289	1	-3.5588
OR4X2	0.030001	0.030023	0.957289	1	-3.5577
MTR	0.030135	0.030156	0.957289	1	-3.5572
URM1	0.031605	0.031692	0.957289	1	-3.5529
DEFB107A	0.031939	0.032035	0.957289	1	-3.5366
DEFB107B	0.031939	0.032035	0.957289	1	-3.5366
MAGEA6	0.03214	0.032238	0.957289	1	-3.5306
HLA-DQB1	0.03254	0.032663	0.957289	1	-3.5272
CNTNAP5	0.031739	0.03183	0.957289	1	-3.5245
WDR81	0.032808	0.032924	0.957289	1	-3.5241
SNAPC4	0.032273	0.032377	0.957289	1	-3.5239
FAM180B	0.032407	0.032516	0.957289	1	-3.5191
SLC25A10	0.032941	0.03307	0.957289	1	-3.5165
CCNA2	0.033342	0.033437	0.957289	1	-3.5021
MICU2	0.033075	0.033183	0.957289	1	-3.4998
MATN2	0.033476	0.033583	0.957289	1	-3.4863
PRKCSH	0.033743	0.033855	0.957289	1	-3.4849
ABCD4	0.03401	0.034099	0.957289	1	-3.4813
AHCYL2	0.03361	0.033721	0.957289	1	-3.4699
GPR183	0.034545	0.034666	0.959431	1	-3.4686
SLC25A23	0.03508	0.035234	0.959431	1	-3.4572
TOMM20	0.03548	0.035655	0.959431	1	-3.4523
RYR2	0.035748	0.035867	0.961153	1	-3.4476
UGP2	0.035347	0.035522	0.959431	1	-3.4437
HELLS	0.034812	0.034956	0.959431	1	-3.4424
MAML1	0.034946	0.035108	0.959431	1	-3.4408
HIPK1	0.03655	0.036728	0.961961	1	-3.4374
hsa-mir-302f	0.035213	0.035371	0.959431	1	-3.4335
ACOT11	0.036817	0.036939	0.961961	1	-3.4332
PROX1	0.03695	0.037102	0.961961	1	-3.429
C1QTNF5	0.037351	0.037504	0.961961	1	-3.4238
PPIL1	0.037084	0.037238	0.961961	1	-3.422
FRZB	0.03802	0.038189	0.961961	1	-3.4103
FAM163B	0.037218	0.037367	0.961961	1	-3.4059
PENK	0.39415	0.40178	0.973807	1	-3.3953
CPOX	0.039356	0.039472	0.961961	1	-3.3867
PPP2R5B	0.039222	0.039348	0.961961	1	-3.3833
CHRDL1	0.012921	0.024233	0.957289	1	-3.3767
hsa-mir-5704	0.040158	0.040214	0.961961	1	-3.3751
ALS2	0.040024	0.040075	0.961961	1	-3.3749
RAB26	0.039623	0.039724	0.961961	1	-3.3686
DPH6	0.040759	0.040799	0.961961	1	-3.3599
ATPBD4	0.040759	0.040799	0.961961	1	-3.3599
KIF20B	0.04096	0.041003	0.961961	1	-3.3584
hsa-mir-5787	0.041093	0.04113	0.961961	1	-3.3551
ACAP2	0.041227	0.041272	0.961961	1	-3.3541
OMD	0.04136	0.041414	0.961961	1	-3.3518
TMEM233	0.041761	0.041849	0.961961	1	-3.346
ARHGEF1	0.041494	0.041548	0.961961	1	-3.345
FBXO18	0.040559	0.040629	0.961961	1	-3.3389
CCDC170	0.042697	0.042812	0.961961	1	-3.3327
QRFPR	0.042563	0.04267	0.961961	1	-3.3326
MXD4	0.04283	0.042957	0.961961	1	-3.3326
ENHO	0.043231	0.043339	0.961961	1	-3.3301
TUBB1	0.043499	0.043616	0.961961	1	-3.3287
GALNT4	0.043031	0.043168	0.961961	1	-3.3277
POC1B-GALNT4	0.043031	0.043168	0.961961	1	-3.3277
MAPK9	0.041628	0.041718	0.961961	1	-3.3263
C7orf55	0.043766	0.043841	0.961961	1	-3.3259
LOC100129636	0.044167	0.044248	0.961961	1	-3.3198
CYP20A1	0.044969	0.0451	0.961961	1	-3.3171
CLNK	0.045236	0.045399	0.961961	1	-3.3153
POLR2C	0.045102	0.045235	0.961961	1	-3.3101
DNAH8	0.04537	0.045525	0.961961	1	-3.308
NELFCD	0.045503	0.04566	0.961961	1	-3.3021
FAT4	0.045637	0.045771	0.961961	1	-3.2973
FBXL4	0.046171	0.046266	0.961961	1	-3.2925
ENDOD1	0.046038	0.046142	0.961961	1	-3.29
PPM1G	0.045904	0.046005	0.961961	1	-3.2879
CHID1	0.046439	0.046555	0.961961	1	-3.2857
ASCC3	0.046572	0.046652	0.961961	1	-3.2817
FN3KRP	0.046973	0.047045	0.961961	1	-3.2743
TERT	0.047508	0.047584	0.961961	1	-3.2627
hsa-mir-1225	0.04724	0.047304	0.961961	1	-3.2626
C15orf54	0.047909	0.04802	0.961961	1	-3.2589
APTX	0.048577	0.0487	0.961961	1	-3.2536
IL23R	0.048443	0.048542	0.961961	1	-3.2533
FOXR1	0.047775	0.047863	0.961961	1	-3.2531
GP2	0.04871	0.048863	0.961961	1	-3.2522
BMP4	0.048844	0.049016	0.961961	1	-3.252
CIB1	0.048978	0.049159	0.961961	1	-3.2512
RABGEF1	0.049111	0.049304	0.961961	1	-3.2492
BMP2K	0.050047	0.050245	0.961961	1	-3.2321
ZMYND10	0.049245	0.049437	0.961961	1	-3.224
AASDHPPT	0.05018	0.050368	0.961961	1	-3.2236
SLC35D3	0.050715	0.050852	0.961961	1	-3.223
C8orf82	0.050849	0.050973	0.961961	1	-3.2214
CNDP2	0.049379	0.049567	0.961961	1	-3.2202
GPX6	0.11728	0.17935	0.973807	1	-3.2185
GLYATL1	0.051249	0.051339	0.961961	1	-3.2139
ARHGAP24	0.051517	0.051629	0.961961	1	-3.2087
IL17D	0.05165	0.051753	0.961961	1	-3.2084
OR1L4	0.15676	0.20902	0.973807	1	-3.2058
PDZD2	0.051918	0.052019	0.961961	1	-3.2024
LRTM2	0.051784	0.051887	0.961961	1	-3.1983
LGR5	0.036412	0.065886	0.97144	1	-3.1912
SLC26A8	0.052319	0.052388	0.961961	1	-3.1893
CASZ1	0.052853	0.052974	0.961961	1	-3.1832
SELM	0.05312	0.053225	0.961961	1	-3.1823
ZDHHC9	0.053388	0.053471	0.961961	1	-3.1724
NKAP	0.053521	0.053605	0.961961	1	-3.1717
SPTLC2	0.053655	0.053742	0.961961	1	-3.1708
GZMB	0.053789	0.053871	0.961961	1	-3.17
hsa-mir-146a	0.053922	0.053991	0.961961	1	-3.1678
EPHB1	0.054323	0.054335	0.961961	1	-3.1633
AIFM3	0.052987	0.053081	0.961961	1	-3.162
FAM171A2	0.054457	0.054452	0.961961	1	-3.1617
TLDC1	0.05459	0.05459	0.961961	1	-3.1591
CXCL11	0.054724	0.054726	0.961961	1	-3.1577
RNF126	0.055526	0.055513	0.967364	1	-3.1543
SLC22A18AS	0.055659	0.05564	0.967364	1	-3.1538
HCRTR1	0.054858	0.054855	0.961961	1	-3.1526
ZNF683	0.052051	0.052135	0.961961	1	-3.1514
FARP1	0.056862	0.056863	0.97144	1	-3.1379
ATRX	0.056461	0.056486	0.97144	1	-3.1376
CLU	0.056996	0.057005	0.97144	1	-3.1333
CC2D1A	0.057129	0.057147	0.97144	1	-3.1311
FTSJD2	0.057597	0.057617	0.97144	1	-3.1264
CMTR1	0.057597	0.057617	0.97144	1	-3.1264
hsa-mir-4300	0.057798	0.057828	0.97144	1	-3.1228
ANKRD34B	0.058065	0.058081	0.97144	1	-3.1192
VWA5B2	0.057931	0.057959	0.97144	1	-3.1152
TRPC3	0.058466	0.058442	0.97144	1	-3.1133
MORF4L1	0.057263	0.057291	0.97144	1	-3.1084
PUM1	0.058733	0.058726	0.97144	1	-3.1077
BTF3	0.51273	0.51313	0.99375	1	-3.1047
GPX3	0.4956	0.49632	0.989431	1	-3.1038
CCDC33	0.059134	0.059107	0.97144	1	-3.102
GSG1L	0.059669	0.059669	0.97144	1	-3.1005
FAM222A	0.059802	0.059801	0.97144	1	-3.1002
UBXN6	0.059936	0.059933	0.97144	1	-3.0988
LRFN4	0.060069	0.060066	0.97144	1	-3.0907
TP53I11	0.061005	0.060972	0.97144	1	-3.0899
ZNF280B	0.061139	0.061108	0.97144	1	-3.0895
VILL	0.061272	0.061234	0.97144	1	-3.0889
ATP10D	0.061406	0.061353	0.97144	1	-3.0877
PTDSS2	0.058867	0.058836	0.97144	1	-3.0844
hsa-mir-5698	0.061673	0.061599	0.97144	1	-3.0844
PCSK9	0.061807	0.061697	0.97144	1	-3.0823
SGMS2	0.061539	0.061469	0.97144	1	-3.0808
SRR	0.062475	0.062352	0.97144	1	-3.0799
STAMBP	0.062609	0.062472	0.97144	1	-3.0792
ERCC6	0.06027	0.060254	0.97144	1	-3.0744
CSB-PGBD3	0.06027	0.060254	0.97144	1	-3.0744
ISYNA1	0.062341	0.062222	0.97144	1	-3.0734
FGF21	0.062742	0.062587	0.97144	1	-3.0721
hsa-mir-7107	0.063143	0.062993	0.97144	1	-3.0702
CMTM7	0.063009	0.062839	0.97144	1	-3.0688
hsa-mir-4456	0.029316	0.05339	0.961961	1	-3.0681
POU5F2	0.37528	0.38514	0.973807	1	-3.0665
CAD	0.063277	0.063132	0.97144	1	-3.0659
hsa-mir-4512	0.039296	0.070929	0.973204	1	-3.0639
KSR2	0.062208	0.062086	0.97144	1	-3.0607
hsa-mir-1255a	0.063678	0.063563	0.97144	1	-3.0597
LSMEM2	0.063544	0.063431	0.97144	1	-3.058
CTXN3	0.064212	0.064092	0.97144	1	-3.0509
CSNK2A3	0.064613	0.06452	0.97144	1	-3.0456
MOV10L1	0.063945	0.063839	0.97144	1	-3.0445
hsa-mir-6816	0.06488	0.064776	0.97144	1	-3.0443
YPEL1	0.064079	0.063964	0.97144	1	-3.0434
TMEM59	0.4012	0.40796	0.973807	1	-3.0426
WASF3	0.065014	0.064901	0.97144	1	-3.042
SDCBP2	0.065415	0.065344	0.97144	1	-3.0398
XYLB	0.065682	0.065619	0.97144	1	-3.039
STOM	0.065549	0.065485	0.97144	1	-3.0386
IL25	0.065816	0.065769	0.97144	1	-3.0355
ZNRF4	0.065949	0.065908	0.97144	1	-3.0343
TMEM43	0.066217	0.066208	0.97144	1	-3.033
IGDCC4	0.066083	0.066059	0.97144	1	-3.0315
PDYN	0.066484	0.066445	0.97144	1	-3.0308
NAGA	0.066751	0.066697	0.97144	1	-3.0308
PSMC6	0.10241	0.16838	0.973807	1	-3.0305
MAFF	0.066885	0.06681	0.97144	1	-3.0291
PNMA2	0.06635	0.066338	0.97144	1	-3.029
SAR1B	0.14444	0.19965	0.973807	1	-3.0284
EFCAB4B	0.066618	0.066566	0.97144	1	-3.0272
GGPS1	0.067152	0.067059	0.972677	1	-3.0269
SMC1A	0.34514	0.35957	0.973807	1	-3.0268
ZNF551	0.067553	0.067427	0.972677	1	-3.0264
KCNQ1	0.067687	0.067563	0.972677	1	-3.0241
RLIM	0.06782	0.067714	0.972677	1	-3.0224
ATG3	0.065148	0.065039	0.97144	1	-3.0219
NAPSA	0.068088	0.067975	0.972677	1	-3.0205
CDKN2D	0.068489	0.068367	0.972677	1	-3.0164
FAM228A	0.068355	0.06823	0.972677	1	-3.0159
BTBD11	0.068756	0.068663	0.972677	1	-3.0158
CREB3L2	0.068889	0.068766	0.972677	1	-3.0156
BCR	0.069023	0.068889	0.972677	1	-3.0141
GOLGA6L1	0.069624	0.069495	0.972677	1	-3.0118
LOC440243	0.069624	0.069495	0.972677	1	-3.0118
FAM3D	0.069424	0.069318	0.972677	1	-3.0106
ACYP1	0.069825	0.06968	0.972677	1	-3.0103
EPHX3	0.22361	0.26041	0.973807	1	-3.0085
MAP3K7	0.011593	0.021733	0.957289	1	-3.0049
SLC9A9	0.070359	0.070195	0.972677	1	-3.0048
hsa-mir-3914-1	0.070694	0.070569	0.973204	1	-3.0032
TEAD3	0.070894	0.070793	0.973204	1	-3.0014
HPSE	0.071429	0.071279	0.973204	1	-2.9954
DCAF11	0.06929	0.069176	0.972677	1	-2.9933
FAM131B	0.070092	0.069947	0.972677	1	-2.9888
hsa-mir-6081	0.071829	0.07167	0.973204	1	-2.9878
USP32	0.071696	0.07155	0.973204	1	-2.9877
KRAS	0.070226	0.070074	0.972677	1	-2.9865
PRRC2A	0.07223	0.072067	0.973204	1	-2.9859
KLLN	0.072364	0.072202	0.973204	1	-2.9859
GCOM1	0.11791	0.17984	0.973807	1	-2.9853
MYZAP	0.11791	0.17984	0.973807	1	-2.9853
IFI6	0.0097317	0.018226	0.945545	1	-2.9846
IGFN1	0.072765	0.07263	0.973807	1	-2.9826
COX11	0.072899	0.072751	0.973807	1	-2.9823
SS18L1	0.073166	0.073004	0.973807	1	-2.9794
TMEM61	0.073299	0.073106	0.973807	1	-2.979
C3orf55	0.073433	0.073235	0.973807	1	-2.9746
SNF8	0.074101	0.07388	0.973807	1	-2.9694
ITPR3	0.072097	0.071926	0.973204	1	-2.9681
WDR7	0.074369	0.074152	0.973807	1	-2.9676
SDHAF1	0.074235	0.074024	0.973807	1	-2.9659
BZW1	0.072498	0.072334	0.973204	1	-2.9658
MAP2K2	0.074636	0.074404	0.973807	1	-2.9651
TYW5	0.075571	0.075317	0.973807	1	-2.9593
CCND1	0.07517	0.074915	0.973807	1	-2.9584
CHAF1A	0.076106	0.075876	0.973807	1	-2.9551
FBXW5	0.075705	0.075462	0.973807	1	-2.9549
SLC6A3	0.076373	0.07616	0.973807	1	-2.9525
PDPN	0.076507	0.0763	0.973807	1	-2.9522
SEC31A	0.07664	0.076444	0.973807	1	-2.9497
VTN	0.075972	0.07572	0.973807	1	-2.949
SOCS2	0.076908	0.076728	0.973807	1	-2.945
TMEM116	0.077041	0.076867	0.973807	1	-2.9448
CTNNAL1	0.077175	0.07701	0.973807	1	-2.9416
MSMB	0.077442	0.0773	0.973807	1	-2.9404
HNRNPH1	0.077576	0.07745	0.973807	1	-2.9394
hsa-mir-3167	0.077309	0.077138	0.973807	1	-2.9374
METTL3	0.077843	0.077754	0.973807	1	-2.9367
ENPP6	0.077709	0.077589	0.973807	1	-2.9345
VCPIP1	0.078378	0.078288	0.973807	1	-2.9337
HINFP	0.078244	0.078155	0.973807	1	-2.9333
C12orf49	0.078645	0.078551	0.973807	1	-2.9325
AGR3	0.078511	0.078416	0.973807	1	-2.9315
KNG1	0.079046	0.078928	0.973807	1	-2.9296
UBE2D4	0.079313	0.0792	0.973807	1	-2.9275
HOXA3	0.079447	0.079363	0.973807	1	-2.9273
LRIT1	0.079179	0.079068	0.973807	1	-2.9269
HEMK1	0.078779	0.078676	0.973807	1	-2.9251
ITGB3	0.23849	0.27211	0.973807	1	-2.9242
ARIH2	0.080115	0.079987	0.973807	1	-2.9213
C19orf40	0.079714	0.079618	0.973807	1	-2.9208
HINT2	0.07958	0.079497	0.973807	1	-2.9198
ZNF35	0.079981	0.079858	0.973807	1	-2.919
FXYD3	0.080516	0.080357	0.973807	1	-2.9156
CCDC90B	0.080783	0.080613	0.973807	1	-2.9153
ADCY10	0.081184	0.08101	0.973807	1	-2.9149
CCDC80	0.080382	0.080245	0.973807	1	-2.9138
COL16A1	0.080917	0.080761	0.973807	1	-2.9116
RPL5	0.081318	0.081137	0.973807	1	-2.9116
OR2S2	0.027998	0.051097	0.961961	1	-2.9074
HMOX2	0.081986	0.081818	0.973807	1	-2.9059
hsa-mir-4478	0.08252	0.082322	0.973807	1	-2.9038
SPATA6	0.082253	0.08207	0.973807	1	-2.9031
SPATA21	0.082387	0.08219	0.973807	1	-2.903
PPWD1	0.082119	0.081942	0.973807	1	-2.9029
GATSL2	0.082788	0.082583	0.973807	1	-2.9004
ZBED4	0.082654	0.082453	0.973807	1	-2.8999
hsa-mir-4666b	0.082921	0.082708	0.973807	1	-2.8997
LOC388849	0.083322	0.083125	0.973807	1	-2.898
AIFM1	0.083857	0.083652	0.973807	1	-2.8956
C3orf67	0.08105	0.080888	0.973807	1	-2.8953
GPR139	0.17604	0.22367	0.973807	1	-2.893
TNFRSF8	0.08399	0.083771	0.973807	1	-2.8919
CPA5	0.084659	0.084406	0.973807	1	-2.8887
MYH7	0.085059	0.084804	0.973807	1	-2.8887
PLCXD2	0.083055	0.082867	0.973807	1	-2.8886
GRASP	0.084926	0.08467	0.973807	1	-2.8883
SH3BGRL	0.085193	0.084954	0.973807	1	-2.8878
GEMIN8	0.084792	0.084536	0.973807	1	-2.8873
FLJ22184	0.085327	0.085071	0.973807	1	-2.8869
RNF32	0.085594	0.085303	0.973807	1	-2.886
PIH1D2	0.085728	0.085436	0.973807	1	-2.886
SLX4IP	0.086129	0.085815	0.973807	1	-2.8835
OR5AC2	0.086262	0.085945	0.973807	1	-2.8835
ANG	0.086663	0.086323	0.973807	1	-2.8802
ATP5B	0.086797	0.086464	0.973807	1	-2.8801
GCG	0.083189	0.082995	0.973807	1	-2.8798
UNC5A	0.23744	0.35179	0.973807	1	-2.8792
CNTF	0.083456	0.083239	0.973807	1	-2.8782
ALMS1	0.083723	0.083499	0.973807	1	-2.8765
hsa-mir-548a-1	0.087465	0.087136	0.973807	1	-2.8737
SDR42E1	0.086529	0.086232	0.973807	1	-2.8736
CXCL5	0.087198	0.086893	0.973807	1	-2.8733
SEC23A	0.087331	0.087	0.973807	1	-2.8725
CCDC148	0.087599	0.087284	0.973807	1	-2.8714
CPSF6	0.087732	0.0874	0.973807	1	-2.8703
ACTB	0.087999	0.087667	0.973807	1	-2.8681
CBY1	0.088133	0.087792	0.973807	1	-2.8668
NDUFS4	0.088267	0.087911	0.973807	1	-2.8661
CCDC140	0.0884	0.088053	0.973807	1	-2.8656
ACOXL	0.088668	0.088316	0.973807	1	-2.8648
FGF3	0.088935	0.088586	0.973807	1	-2.8588
CYP4B1	0.089469	0.089155	0.973807	1	-2.8574
BMP3	0.090004	0.089665	0.973807	1	-2.8551
L1TD1	0.08987	0.089522	0.973807	1	-2.855
SLC27A3	0.090539	0.090253	0.973807	1	-2.8531
hsa-mir-548a-3	0.089069	0.088739	0.973807	1	-2.8522
PSMB3	0.090806	0.090528	0.973807	1	-2.849
OCRL	0.090939	0.09067	0.973807	1	-2.8466
GGCT	0.09134	0.091072	0.973807	1	-2.8406
ATF7IP	0.091073	0.090792	0.973807	1	-2.8405
hsa-mir-641	0.091207	0.090934	0.973807	1	-2.8403
NDUFA5	0.091474	0.091197	0.973807	1	-2.8394
hsa-mir-26b	0.092009	0.091731	0.973807	1	-2.8356
hsa-mir-4687	0.092543	0.092235	0.973807	1	-2.8258
ERCC6L	0.092677	0.092374	0.973807	1	-2.8252
HNRNPUL1	0.09281	0.092513	0.973807	1	-2.8248
AICDA	0.092944	0.092646	0.973807	1	-2.8226
ITGA2B	0.093479	0.09318	0.973807	1	-2.8206
PSMB4	0.093746	0.093467	0.973807	1	-2.8197
MAK16	0.093345	0.093056	0.973807	1	-2.8192
IPO5	0.094013	0.093745	0.973807	1	-2.8181
PRC1	0.09428	0.094003	0.973807	1	-2.8181
RFWD3	0.094414	0.09414	0.973807	1	-2.8171
TRAFD1	0.094548	0.094278	0.973807	1	-2.817
ENAM	0.094681	0.094406	0.973807	1	-2.8156
PHOSPHO2-KLHL23	0.094882	0.09462	0.973807	1	-2.814
KLHL23	0.094882	0.09462	0.973807	1	-2.814
OR4A47	0.095216	0.094924	0.973807	1	-2.8117
GNAQ	0.095617	0.095321	0.973807	1	-2.8093
PRB3	0.095483	0.095201	0.973807	1	-2.809
H2AFX	0.095349	0.095052	0.973807	1	-2.8079
NBEAL1	0.09575	0.095459	0.973807	1	-2.8064
TAF9B	0.096018	0.095707	0.973807	1	-2.8056
ESCO1	0.096419	0.096114	0.973807	1	-2.8043
hsa-mir-4435-2	0.095884	0.09558	0.973807	1	-2.8033
ADIPOR2	0.096686	0.096386	0.973807	1	-2.8033
EXTL1	0.096819	0.096488	0.973807	1	-2.8029
RAPGEF4	0.096552	0.096246	0.973807	1	-2.8025
TP53I3	0.097087	0.09675	0.973807	1	-2.8007
hsa-mir-4649	0.09722	0.096888	0.973807	1	-2.7997
hsa-mir-4691	0.30385	0.32484	0.973807	1	-2.7992
LCN2	0.097354	0.097027	0.973807	1	-2.7975
RFESD	0.097621	0.097261	0.973807	1	-2.7969
CCDC81	0.097488	0.097142	0.973807	1	-2.7959
ZNF347	0.098022	0.097617	0.973807	1	-2.7923
SLC6A7	0.35075	0.36417	0.973807	1	-2.792
FOXD4L6	0.097822	0.097418	0.973807	1	-2.7918
FOXD4L3	0.097822	0.097418	0.973807	1	-2.7918
COL6A1	0.098156	0.097762	0.973807	1	-2.7908
GPR27	0.098423	0.098032	0.973807	1	-2.7894
OAF	0.098289	0.097911	0.973807	1	-2.7893
hsa-mir-4492	0.098557	0.098179	0.973807	1	-2.7873
hsa-mir-513c	0.09869	0.098318	0.973807	1	-2.7871
PGBD3	0.099225	0.098843	0.973807	1	-2.7851
SUPT20HL2	0.098958	0.098585	0.973807	1	-2.7847
BRAP	0.099359	0.099	0.973807	1	-2.7845
ADARB2	0.099492	0.09913	0.973807	1	-2.7834
LIPK	0.099626	0.099278	0.973807	1	-2.7822
hsa-mir-30d	0.099759	0.099427	0.973807	1	-2.7816
AEBP2	0.10003	0.099696	0.973807	1	-2.7798
DPPA3	0.099893	0.099573	0.973807	1	-2.7796
SYCE3	0.10043	0.10008	0.973807	1	-2.7756
UBE3D	0.10096	0.10056	0.973807	1	-2.769
hsa-mir-6165	0.1011	0.10069	0.973807	1	-2.7685
EPHX1	0.10136	0.10095	0.973807	1	-2.7681
WNT7B	0.10163	0.10121	0.973807	1	-2.7645
FNBP1L	0.10176	0.10134	0.973807	1	-2.7632
SLC4A7	0.10216	0.10173	0.973807	1	-2.7594
hsa-mir-3692	0.1027	0.10226	0.973807	1	-2.7585
CUL2	0.10337	0.10291	0.973807	1	-2.7558
EIF4G1	0.1031	0.10266	0.973807	1	-2.755
LARGE	0.1039	0.10346	0.973807	1	-2.7535
SHBG	0.10363	0.1032	0.973807	1	-2.7533
B4GALNT1	0.10484	0.10437	0.973807	1	-2.7484
TMEM30B	0.1043	0.10384	0.973807	1	-2.7478
KIAA1324	0.1051	0.10464	0.973807	1	-2.7469
hsa-mir-3186	0.10497	0.1045	0.973807	1	-2.7466
MTAP	0.10524	0.10478	0.973807	1	-2.7454
TVP23C-CDRT4	0.10196	0.10152	0.973807	1	-2.7449
TVP23C	0.10196	0.10152	0.973807	1	-2.7449
COX16	0.10537	0.10496	0.973807	1	-2.7441
KCNN3	0.10243	0.102	0.973807	1	-2.7413
RFX7	0.10564	0.10522	0.973807	1	-2.7398
hsa-mir-3146	0.10591	0.10549	0.973807	1	-2.7389
MRC2	0.10617	0.10572	0.973807	1	-2.7376
hsa-mir-6761	0.10604	0.1056	0.973807	1	-2.7373
hsa-mir-1208	0.10551	0.10508	0.973807	1	-2.7366
CLDN15	0.10724	0.10678	0.973807	1	-2.7307
LSMD1	0.10738	0.10693	0.973807	1	-2.7306
TRIM11	0.10751	0.10708	0.973807	1	-2.7301
FOXD3	0.10778	0.10736	0.973807	1	-2.7287
SLC13A2	0.10845	0.10803	0.973807	1	-2.7276
HSPA2	0.10791	0.10749	0.973807	1	-2.7273
LRRC72	0.10818	0.10774	0.973807	1	-2.7263
APOBEC4	0.10858	0.10818	0.973807	1	-2.7254
NDUFA13	0.10871	0.10831	0.973807	1	-2.7251
PPP1R7	0.10804	0.10762	0.973807	1	-2.7248
ZIM2	0.10891	0.1085	0.973807	1	-2.7245
PEG3	0.10891	0.1085	0.973807	1	-2.7245
ADIRF	0.10911	0.1087	0.973807	1	-2.7243
CLN6	0.10925	0.10885	0.973807	1	-2.7237
RAB20	0.22125	0.25856	0.973807	1	-2.7193
DCDC1	0.10978	0.10938	0.973807	1	-2.7186
UGT1A1	0.11085	0.11043	0.973807	1	-2.7175
USP1	0.11005	0.10964	0.973807	1	-2.7173
AURKAIP1	0.11018	0.10976	0.973807	1	-2.7173
PSMC1	0.11179	0.11134	0.973807	1	-2.7168
SORBS3	0.11205	0.11164	0.973807	1	-2.7166
MRPL32	0.11165	0.11122	0.973807	1	-2.7165
CLCN4	0.11192	0.1115	0.973807	1	-2.7164
RAB19	0.11245	0.11202	0.973807	1	-2.7151
ST8SIA1	0.11232	0.11189	0.973807	1	-2.715
VANGL2	0.26473	0.29308	0.973807	1	-2.7145
PDZD3	0.11272	0.1123	0.973807	1	-2.7129
NCR3LG1	0.11219	0.11177	0.973807	1	-2.7127
OR4K14	0.11312	0.11271	0.973807	1	-2.7113
hsa-mir-5010	0.11286	0.11242	0.973807	1	-2.711
ACY3	0.11152	0.11108	0.973807	1	-2.7107
OXT	0.11326	0.11284	0.973807	1	-2.7097
CSE1L	0.11339	0.11298	0.973807	1	-2.7075
REEP2	0.11352	0.11309	0.973807	1	-2.7075
KCND1	0.11392	0.11348	0.973807	1	-2.7051
CACNA1G	0.11379	0.11333	0.973807	1	-2.7048
KIAA0020	0.11419	0.11373	0.973807	1	-2.703
FOXJ2	0.11433	0.11383	0.973807	1	-2.7028
SUSD5	0.11446	0.11398	0.973807	1	-2.7022
NMUR2	0.11459	0.11412	0.973807	1	-2.7004
DTD2	0.11473	0.11426	0.973807	1	-2.6993
SGK2	0.11499	0.1145	0.973807	1	-2.6956
MS4A1	0.11259	0.11216	0.973807	1	-2.6955
RFPL1	0.11513	0.11464	0.973807	1	-2.6944
GALC	0.11593	0.11545	0.973807	1	-2.6936
LPIN1	0.11553	0.11505	0.973807	1	-2.6927
ANKRD37	0.1158	0.11531	0.973807	1	-2.6916
LRRC70	0.1162	0.11571	0.973807	1	-2.6916
TBX2	0.11646	0.11596	0.973807	1	-2.6899
ZNF768	0.11566	0.11519	0.973807	1	-2.6897
NAA38	0.11673	0.11622	0.973807	1	-2.687
KIAA1429	0.1166	0.11608	0.973807	1	-2.6854
MAMLD1	0.13751	0.19449	0.973807	1	-2.6839
DDHD1	0.11713	0.11664	0.973807	1	-2.6808
CD177	0.117	0.1165	0.973807	1	-2.6805
CTDSPL	0.11727	0.11678	0.973807	1	-2.678
HRC	0.1174	0.11691	0.973807	1	-2.6778
AP1G2	0.11767	0.11719	0.973807	1	-2.6776
ERAP1	0.1178	0.11731	0.973807	1	-2.6764
ALKBH3	0.11793	0.11745	0.973807	1	-2.6758
DAXX	0.11833	0.1178	0.973807	1	-2.6756
CXorf23	0.11847	0.11794	0.973807	1	-2.6755
WFDC10B	0.11813	0.11763	0.973807	1	-2.6744
WFDC13	0.11813	0.11763	0.973807	1	-2.6744
ASH1L	0.1186	0.11807	0.973807	1	-2.6732
AGPAT9	0.11914	0.11863	0.973807	1	-2.6724
EMC2	0.11927	0.11876	0.973807	1	-2.6714
POTEC	0.11974	0.11927	0.973807	1	-2.6708
USH2A	0.11874	0.11819	0.973807	1	-2.6707
GTF2H4	0.12021	0.1197	0.973807	1	-2.6699
RBM6	0.12101	0.12049	0.973807	1	-2.6672
FAM220A	0.12248	0.122	0.973807	1	-2.6639
ZC3H13	0.11686	0.11636	0.973807	1	-2.6634
SPANXN2	0.12234	0.12185	0.973807	1	-2.6632
TMEM51	0.12274	0.12229	0.973807	1	-2.6613
ASB15	0.12288	0.12241	0.973807	1	-2.6605
ARPC4	0.12308	0.12264	0.973807	1	-2.6572
ARPC4-TTLL3	0.12308	0.12264	0.973807	1	-2.6572
PVRL4	0.119	0.11848	0.973807	1	-2.6548
GABARAPL2	0.12341	0.12296	0.973807	1	-2.6543
PPP2R2A	0.12368	0.12322	0.973807	1	-2.6519
PDP1	0.12114	0.12061	0.973807	1	-2.6491
NUP188	0.12395	0.12348	0.973807	1	-2.6491
FLVCR1	0.12421	0.12375	0.973807	1	-2.6482
SULT4A1	0.12408	0.12363	0.973807	1	-2.6477
hsa-mir-3656	0.12448	0.12398	0.973807	1	-2.6466
hsa-mir-5094	0.12221	0.12172	0.973807	1	-2.6462
RNF19B	0.12488	0.12442	0.973807	1	-2.6449
ABCA4	0.12502	0.12454	0.973807	1	-2.6446
IZUMO2	0.12528	0.1248	0.973807	1	-2.6408
MED21	0.12568	0.12525	0.973807	1	-2.6396
SLC25A30	0.12515	0.12468	0.973807	1	-2.6395
COL1A2	0.12609	0.12565	0.973807	1	-2.6392
hsa-mir-4463	0.12595	0.12552	0.973807	1	-2.6391
RET	0.12582	0.12538	0.973807	1	-2.6381
CKAP2	0.12635	0.12593	0.973807	1	-2.6379
KCNK17	0.12649	0.12607	0.973807	1	-2.6378
ROPN1	0.12782	0.12737	0.973807	1	-2.6331
2024-09-09	0.12702	0.12663	0.973807	1	-2.6323
BEST2	0.12876	0.12831	0.973807	1	-2.6322
RPS17L	0.12842	0.12795	0.973807	1	-2.6319
RPS17	0.12842	0.12795	0.973807	1	-2.6319
hsa-mir-4509-2	0.37802	0.38749	0.973807	1	-2.6312
ZNF468	0.12675	0.12636	0.973807	1	-2.6312
WWTR1	0.10873	0.17292	0.973807	1	-2.6309
hsa-mir-637	0.12475	0.1243	0.973807	1	-2.6268
hsa-mir-8060	0.12929	0.12884	0.973807	1	-2.6267
ATP2B4	0.12956	0.12913	0.973807	1	-2.6252
hsa-mir-4742	0.12983	0.12936	0.973807	1	-2.6252
hsa-mir-4522	0.12969	0.12925	0.973807	1	-2.6246
SNX9	0.3738	0.38392	0.973807	1	-2.624
H2AFY2	0.13023	0.12976	0.973807	1	-2.6232
ZNF737	0.13009	0.12961	0.973807	1	-2.6228
DNAJC13	0.12996	0.12947	0.973807	1	-2.6216
MYLK4	0.12903	0.12858	0.973807	1	-2.6212
MAP2K7	0.13036	0.12989	0.973807	1	-2.6211
SVOP	0.13076	0.13032	0.973807	1	-2.6198
RRAS	0.13063	0.13018	0.973807	1	-2.6158
HMGCL	0.14172	0.19765	0.973807	1	-2.6156
FOXN2	0.13116	0.13071	0.973807	1	-2.6147
CCNI2	0.13143	0.13101	0.973807	1	-2.6143
SLAIN1	0.13156	0.13115	0.973807	1	-2.6139
JSRP1	0.1321	0.13168	0.973807	1	-2.61
MRPL47	0.37232	0.38262	0.973807	1	-2.609
NCBP1	0.31119	0.33083	0.973807	1	-2.6082
OR2A5	0.13223	0.13181	0.973807	1	-2.6078
DRD2	0.13263	0.13223	0.973807	1	-2.6074
TDRD10	0.1325	0.1321	0.973807	1	-2.6065
TRAF4	0.13237	0.13197	0.973807	1	-2.6049
GIF	0.1329	0.13249	0.973807	1	-2.6039
NXT2	0.13277	0.13236	0.973807	1	-2.6036
H2BFM	0.13344	0.13295	0.973807	1	-2.6022
CSNK1G1	0.1333	0.13284	0.973807	1	-2.6004
HYAL1	0.13424	0.13375	0.973807	1	-2.5997
GPR20	0.41232	0.41791	0.973807	1	-2.5994
RNF7	0.1341	0.13362	0.973807	1	-2.5993
HTT	0.13357	0.13307	0.973807	1	-2.5991
UPK1A	0.13397	0.13351	0.973807	1	-2.599
KRT85	0.13384	0.13337	0.973807	1	-2.5981
C12orf54	0.13464	0.13417	0.973807	1	-2.5959
MAPK10	0.13504	0.13457	0.973807	1	-2.5927
SLC25A4	0.13477	0.13431	0.973807	1	-2.5925
HLA-DMB	0.13531	0.13488	0.973807	1	-2.5909
LENG9	0.13517	0.13473	0.973807	1	-2.5896
PRMT3	0.13557	0.13517	0.973807	1	-2.5883
CHRM3	0.13491	0.13445	0.973807	1	-2.5872
ANKZF1	0.13584	0.13542	0.973807	1	-2.5845
SPA17	0.13624	0.1358	0.973807	1	-2.5839
MMEL1	0.13638	0.1359	0.973807	1	-2.5836
RCBTB1	0.13611	0.13566	0.973807	1	-2.5827
ZBED1_X	0.13671	0.13624	0.973807	1	-2.5821
ZBED1_Y	0.13671	0.13624	0.973807	1	-2.5821
DZIP1	0.13651	0.13604	0.973807	1	-2.5816
LONP2	0.36702	0.37797	0.973807	1	-2.581
PPP1R27	0.13691	0.13643	0.973807	1	-2.5797
MAOB	0.13731	0.13685	0.973807	1	-2.5788
TMEM169	0.13785	0.13737	0.973807	1	-2.5762
SPATA31D3	0.13751	0.13705	0.973807	1	-2.5758
SPATA31D4	0.13751	0.13705	0.973807	1	-2.5758
PRR19	0.13811	0.13769	0.973807	1	-2.5753
CRHBP	0.13704	0.13658	0.973807	1	-2.5741
CTTN	0.13798	0.13752	0.973807	1	-2.5735
MAP3K9	0.1313	0.13087	0.973807	1	-2.5731
TMEM44	0.13838	0.13797	0.973807	1	-2.5724
TRMT6	0.13825	0.13785	0.973807	1	-2.5716
REXO1L1	0.13851	0.13814	0.973807	1	-2.5709
DKK1	0.13878	0.13843	0.973807	1	-2.5696
ISX	0.13918	0.13887	0.973807	1	-2.5692
OR51E2	0.13891	0.13856	0.973807	1	-2.5689
PPP1R17	0.13905	0.13872	0.973807	1	-2.5684
ACVR2B	0.13945	0.13912	0.973807	1	-2.567
C2orf68	0.13597	0.13553	0.973807	1	-2.5669
ADCK2	0.13958	0.13923	0.973807	1	-2.5662
MCHR2	0.24953	0.28085	0.973807	1	-2.5655
CYP27C1	0.13932	0.139	0.973807	1	-2.5646
ANKRD34C	0.14052	0.14017	0.973807	1	-2.5619
hsa-mir-6759	0.14038	0.14003	0.973807	1	-2.5616
MOB2	0.14012	0.13974	0.973807	1	-2.5613
ZBTB17	0.14065	0.14031	0.973807	1	-2.5599
DOCK3	0.14079	0.14044	0.973807	1	-2.5597
DEFB104B	0.14112	0.1408	0.973807	1	-2.5588
DEFB104A	0.14112	0.1408	0.973807	1	-2.5588
ATP5G1	0.13998	0.13959	0.973807	1	-2.5575
KIAA0754	0.14159	0.1413	0.973807	1	-2.5569
ARFGEF1	0.14145	0.14115	0.973807	1	-2.5568
IL23A	0.14025	0.13989	0.973807	1	-2.5564
OVOL3	0.14172	0.14141	0.973807	1	-2.5557
SNX15	0.50524	0.50582	0.99375	1	-2.5552
hsa-mir-4788	0.14132	0.14101	0.973807	1	-2.555
FCGR2B	0.13865	0.13826	0.973807	1	-2.5536
RARRES2	0.14185	0.14155	0.973807	1	-2.5536
C9orf152	0.14199	0.14167	0.973807	1	-2.5533
CTDSPL2	0.14212	0.1418	0.973807	1	-2.5531
MID1IP1	0.056249	0.099311	0.973807	1	-2.5515
hsa-mir-412	0.14226	0.14191	0.973807	1	-2.5512
CRYGB	0.14266	0.14233	0.973807	1	-2.5504
C10orf76	0.14239	0.14206	0.973807	1	-2.5482
PTP4A3	0.14306	0.14273	0.973807	1	-2.5481
ORC4	0.14332	0.14302	0.973807	1	-2.5477
GCKR	0.14319	0.14289	0.973807	1	-2.5476
hsa-mir-4781	0.14359	0.14327	0.973807	1	-2.5461
VSNL1	0.14393	0.14361	0.973807	1	-2.5428
FAM159A	0.14393	0.14361	0.973807	1	-2.5428
GPR83	0.14373	0.14342	0.973807	1	-2.5424
CYB561D1	0.14092	0.14057	0.973807	1	-2.5412
CARD6	0.14413	0.14382	0.973807	1	-2.5396
PPM1A	0.14426	0.14398	0.973807	1	-2.5376
C7orf57	0.1452	0.14489	0.973807	1	-2.5364
hsa-mir-4804	0.14493	0.14465	0.973807	1	-2.5363
OR9Q2	0.14506	0.14477	0.973807	1	-2.5356
AK4	0.1456	0.1453	0.973807	1	-2.5346
hsa-mir-516b-2	0.14606	0.14576	0.973807	1	-2.5338
hsa-mir-516b-1	0.14606	0.14576	0.973807	1	-2.5338
PLAGL2	0.14479	0.14452	0.973807	1	-2.5337
C11orf48	0.14573	0.14543	0.973807	1	-2.5328
RALA	0.14533	0.14503	0.973807	1	-2.5326
CDK5R1	0.46516	0.4672	0.973807	1	-2.5315
OR4D9	0.1468	0.14647	0.973807	1	-2.5303
F13B	0.14693	0.14663	0.973807	1	-2.527
CLEC12A	0.14747	0.14719	0.973807	1	-2.523
PDE9A	0.1472	0.14692	0.973807	1	-2.5228
ABCF2	0.14787	0.14758	0.973807	1	-2.5225
WIPF1	0.14733	0.14705	0.973807	1	-2.5207
SLC9A5	0.14814	0.14786	0.973807	1	-2.5202
hsa-mir-3941	0.14907	0.14878	0.973807	1	-2.5196
GTF3A	0.148	0.14773	0.973807	1	-2.5194
ZNF580	0.1488	0.14852	0.973807	1	-2.5191
ANKRD30B	0.1492	0.14891	0.973807	1	-2.519
ARHGAP1	0.14894	0.14863	0.973807	1	-2.5186
hsa-mir-100	0.14854	0.14823	0.973807	1	-2.5183
ATG4C	0.14867	0.14838	0.973807	1	-2.5173
SERINC5	0.14987	0.14958	0.973807	1	-2.5164
KRTAP12-1	0.14961	0.14931	0.973807	1	-2.5161
SLC7A1	0.15014	0.14986	0.973807	1	-2.5151
SRC	0.15027	0.15	0.973807	1	-2.5143
BTN3A2	0.15054	0.1503	0.973807	1	-2.513
ZNF148	0.15067	0.15044	0.973807	1	-2.5129
APH1A	0.15041	0.15016	0.973807	1	-2.5119
ZNF282	0.072021	0.12489	0.973807	1	-2.509
NARS2	0.15081	0.15055	0.973807	1	-2.5076
hsa-mir-4511	0.15121	0.15096	0.973807	1	-2.5057
PTGIR	0.15174	0.15147	0.973807	1	-2.505
CDK15	0.15255	0.15225	0.973807	1	-2.5048
KERA	0.11452	0.17723	0.973807	1	-2.5038
POU3F1	0.15268	0.15238	0.973807	1	-2.5035
KLHL40	0.1484	0.14811	0.973807	1	-2.5034
FTSJ3	0.15214	0.15186	0.973807	1	-2.503
COLQ	0.15295	0.15264	0.973807	1	-2.5027
SEZ6	0.15308	0.15277	0.973807	1	-2.5027
TMEM198	0.14934	0.14905	0.973807	1	-2.5012
MLF2	0.15281	0.15251	0.973807	1	-2.5008
TEX261	0.15348	0.15317	0.973807	1	-2.4999
NR1H2	0.13602	0.19336	0.973807	1	-2.4993
CDH3	0.15361	0.15329	0.973807	1	-2.4985
DENND1B	0.15321	0.1529	0.973807	1	-2.4973
C1orf65	0.15388	0.15357	0.973807	1	-2.4969
GYPE	0.15408	0.15377	0.973807	1	-2.4969
NT5DC1	0.15442	0.15412	0.973807	1	-2.4967
EPC1	0.15201	0.15175	0.973807	1	-2.496
TDG	0.15228	0.15197	0.973807	1	-2.4953
TUBB	0.15482	0.15448	0.973807	1	-2.4936
ZC3H7A	0.15495	0.15459	0.973807	1	-2.4923
hsa-mir-1202	0.15522	0.15484	0.973807	1	-2.4919
PTPRB	0.15134	0.15108	0.973807	1	-2.4916
hsa-mir-4425	0.15535	0.15498	0.973807	1	-2.4911
SULT2A1	0.15562	0.15525	0.973807	1	-2.4891
OR2L5	0.15549	0.15511	0.973807	1	-2.4887
DUSP7	0.15629	0.15587	0.973807	1	-2.4877
ANAPC2	0.15602	0.1556	0.973807	1	-2.4871
MPEG1	0.15655	0.15613	0.973807	1	-2.4866
hsa-mir-326	0.15589	0.15548	0.973807	1	-2.486
QDPR	0.15642	0.15602	0.973807	1	-2.486
SH3GLB1	0.15615	0.15573	0.973807	1	-2.4855
ANXA7	0.045051	0.080577	0.973807	1	-2.4854
RIMBP2	0.15682	0.15642	0.973807	1	-2.4851
EFCC1	0.15575	0.15537	0.973807	1	-2.4847
CLDN2	0.15669	0.15628	0.973807	1	-2.4847
LOC440335	0.15749	0.1571	0.973807	1	-2.4788
SPEM1	0.15736	0.15698	0.973807	1	-2.4781
C2orf72	0.15789	0.15753	0.973807	1	-2.4771
hsa-mir-548ay	0.15802	0.15767	0.973807	1	-2.4768
ASUN	0.19629	0.23922	0.973807	1	-2.4759
POLR2E	0.15829	0.15794	0.973807	1	-2.4754
ERP27	0.15816	0.1578	0.973807	1	-2.4741
SEMA5A	0.15883	0.15847	0.973807	1	-2.4732
CELSR1	0.15843	0.15808	0.973807	1	-2.473
SEC16A	0.15909	0.1587	0.973807	1	-2.4728
AHCYL1	0.15936	0.159	0.973807	1	-2.472
PROM2	0.15963	0.15926	0.973807	1	-2.47
STK17A	0.16003	0.15969	0.973807	1	-2.4679
LAMA2	0.16016	0.15981	0.973807	1	-2.4674
AHCTF1	0.16043	0.16007	0.973807	1	-2.4672
FOXP2	0.1599	0.15956	0.973807	1	-2.4649
IFITM2	0.1607	0.16033	0.973807	1	-2.4649
hsa-mir-6840	0.16096	0.16057	0.973807	1	-2.4633
ETNK2	0.1615	0.16103	0.973807	1	-2.4571
RESP18	0.16137	0.16093	0.973807	1	-2.4561
AK1	0.16163	0.16117	0.973807	1	-2.4557
RARA	0.1619	0.16145	0.973807	1	-2.4557
NFRKB	0.24652	0.27847	0.973807	1	-2.4541
ARHGAP17	0.16177	0.1613	0.973807	1	-2.4531
NANOS3	0.16243	0.16195	0.973807	1	-2.4531
TIRAP	0.16257	0.16211	0.973807	1	-2.4531
SLC5A1	0.1627	0.16225	0.973807	1	-2.4522
CUX1	0.16217	0.16173	0.973807	1	-2.452
NR2C2	0.16297	0.16253	0.973807	1	-2.451
FBXL18	0.16337	0.16295	0.973807	1	-2.45
GUCY1B3	0.1635	0.16308	0.973807	1	-2.4482
TAF1	0.16377	0.16334	0.973807	1	-2.4478
KIF2C	0.16364	0.1632	0.973807	1	-2.4474
ELF1	0.16324	0.16281	0.973807	1	-2.4472
VMAC	0.16457	0.16414	0.973807	1	-2.4444
SPATS2L	0.38475	0.39342	0.973807	1	-2.4438
hsa-mir-6831	0.16417	0.16373	0.973807	1	-2.4434
XBP1	0.16471	0.16428	0.973807	1	-2.4433
C8orf46	0.16404	0.16359	0.973807	1	-2.4432
CIB2	0.16484	0.16443	0.973807	1	-2.4421
OXCT2	0.16444	0.16399	0.973807	1	-2.4419
DST	0.16511	0.16466	0.973807	1	-2.4412
VPS51	0.16524	0.16479	0.973807	1	-2.4372
FAM228B	0.16551	0.16507	0.973807	1	-2.4364
TNFAIP2	0.16591	0.16552	0.973807	1	-2.4354
CCT3	0.16631	0.16592	0.973807	1	-2.435
CHRAC1	0.16578	0.16537	0.973807	1	-2.434
SHF	0.16618	0.16579	0.973807	1	-2.4337
ZFYVE19	0.16658	0.16618	0.973807	1	-2.4333
FIBIN	0.16671	0.16633	0.973807	1	-2.4319
RBM22	0.16604	0.16564	0.973807	1	-2.4318
BBIP1	0.16684	0.16644	0.973807	1	-2.4316
BAMBI	0.16725	0.16684	0.973807	1	-2.4301
hsa-mir-4321	0.16738	0.16698	0.973807	1	-2.429
GYPB	0.39468	0.44884	0.973807	1	-2.4269
hsa-mir-125a	0.16751	0.16711	0.973807	1	-2.4258
DALRD3	0.16778	0.1674	0.973807	1	-2.4238
HMGA1	0.16831	0.16797	0.973807	1	-2.423
VPS13C	0.16845	0.16811	0.973807	1	-2.4223
CDS2	0.16791	0.16754	0.973807	1	-2.4222
FAM13A	0.16898	0.16861	0.973807	1	-2.4194
ABTB2	0.16925	0.16888	0.973807	1	-2.4186
C18orf8	0.16965	0.16926	0.973807	1	-2.4172
JAKMIP2	0.16978	0.16938	0.973807	1	-2.416
MAPRE3	0.16992	0.1695	0.973807	1	-2.4157
ZNF177	0.49189	0.49262	0.982364	1	-2.4134
ZNF559-ZNF177	0.49189	0.49262	0.982364	1	-2.4134
CRTC3	0.10847	0.17273	0.973807	1	-2.4132
SNX21	0.17019	0.16974	0.973807	1	-2.4132
PLA2G2F	0.16952	0.16913	0.973807	1	-2.4128
C16orf86	0.1631	0.16267	0.973807	1	-2.4114
NR3C1	0.17045	0.17001	0.973807	1	-2.4096
NQO2	0.17085	0.1704	0.973807	1	-2.4085
ABHD3	0.17072	0.17028	0.973807	1	-2.4084
BRINP3	0.31959	0.33776	0.973807	1	-2.4057
hsa-mir-499b	0.17139	0.17096	0.973807	1	-2.4027
FARP2	0.14593	0.2008	0.973807	1	-2.3991
SLC6A16	0.17232	0.17193	0.973807	1	-2.3977
ST6GAL1	0.17152	0.17108	0.973807	1	-2.3964
RABEP1	0.17259	0.17222	0.973807	1	-2.3961
JMJD8	0.17272	0.17234	0.973807	1	-2.3958
TNFSF13B	0.17313	0.17275	0.973807	1	-2.3937
PPM1E	0.17326	0.17286	0.973807	1	-2.3931
FOXJ3	0.17246	0.17206	0.973807	1	-2.393
NAT8	0.17339	0.173	0.973807	1	-2.3914
PLCH2	0.17353	0.17311	0.973807	1	-2.3909
C14orf159	0.17393	0.17352	0.973807	1	-2.3909
hsa-mir-7515	0.17206	0.17164	0.973807	1	-2.3902
LETM2	0.17433	0.17393	0.973807	1	-2.3889
PTCD2	0.17419	0.1738	0.973807	1	-2.3886
OPTN	0.17379	0.17339	0.973807	1	-2.3885
DPCR1	0.17406	0.17366	0.973807	1	-2.388
GUCA1B	0.38013	0.38926	0.973807	1	-2.3872
ATF3	0.1746	0.17421	0.973807	1	-2.3865
TMEM8C	0.17446	0.17408	0.973807	1	-2.3856
AGBL2	0.17486	0.17444	0.973807	1	-2.3849
BCL2L2	0.175	0.17457	0.973807	1	-2.3845
OTOL1	0.17566	0.17526	0.973807	1	-2.3814
SAMD4B	0.17546	0.17506	0.973807	1	-2.3813
C10orf62	0.1758	0.17538	0.973807	1	-2.3783
GSTCD	0.17593	0.17551	0.973807	1	-2.3782
DPY19L2	0.17633	0.17593	0.973807	1	-2.3775
ATP2B1	0.17607	0.17565	0.973807	1	-2.3757
NAV2	0.17673	0.17638	0.973807	1	-2.3749
S100A4	0.17687	0.17651	0.973807	1	-2.3747
hsa-mir-18b	0.177	0.17666	0.973807	1	-2.3736
SFTPB	0.17713	0.17681	0.973807	1	-2.3731
ZNF304	0.1762	0.17579	0.973807	1	-2.3725
ASPSCR1	0.13999	0.19636	0.973807	1	-2.3718
RGS14	0.1766	0.17623	0.973807	1	-2.3717
PSMA4	0.17727	0.17694	0.973807	1	-2.3696
SESN1	0.17754	0.1772	0.973807	1	-2.3695
UBE2I	0.1778	0.17749	0.973807	1	-2.369
UBE2D2	0.1774	0.17708	0.973807	1	-2.3689
IGFBP5	0.17794	0.17764	0.973807	1	-2.3683
DYNC2H1	0.17847	0.17814	0.973807	1	-2.3662
ABCB6	0.1782	0.17787	0.973807	1	-2.3659
SREBF2	0.17834	0.178	0.973807	1	-2.365
SYT7	0.17927	0.17889	0.973807	1	-2.3641
TLN2	0.17874	0.17838	0.973807	1	-2.3636
CTBP1	0.17901	0.17864	0.973807	1	-2.3623
INPP5K	0.17941	0.17902	0.973807	1	-2.3621
C10orf129	0.17981	0.17938	0.973807	1	-2.3605
hsa-mir-6784	0.17954	0.17913	0.973807	1	-2.3603
CXorf61	0.17914	0.17877	0.973807	1	-2.3601
ZDHHC22	0.019283	0.035629	0.959431	1	-2.3594
GIPC3	0.17994	0.17952	0.973807	1	-2.3594
DPEP1	0.23183	0.26688	0.973807	1	-2.359
VARS	0.18021	0.17977	0.973807	1	-2.3577
hsa-mir-365a	0.18061	0.18016	0.973807	1	-2.3534
CCDC120	0.17767	0.17736	0.973807	1	-2.3531
DNAJC16	0.18088	0.18044	0.973807	1	-2.3492
GPC1	0.18074	0.1803	0.973807	1	-2.3475
CALM2	0.18101	0.18057	0.973807	1	-2.347
COA3	0.18114	0.18071	0.973807	1	-2.3466
RGS2	0.18128	0.18082	0.973807	1	-2.3464
hsa-mir-548ax	0.18141	0.18094	0.973807	1	-2.3454
DISP1	0.18154	0.18104	0.973807	1	-2.3435
ZNF222	0.18221	0.18171	0.973807	1	-2.3383
NKAIN2	0.18195	0.18144	0.973807	1	-2.337
CCDC177	0.18248	0.18198	0.973807	1	-2.3365
NDUFA6	0.18288	0.18237	0.973807	1	-2.3353
EXOSC6	0.18328	0.18273	0.973807	1	-2.3353
XIAP	0.18261	0.18213	0.973807	1	-2.3352
KATNA1	0.15651	0.20883	0.973807	1	-2.3345
VAV2	0.18301	0.18249	0.973807	1	-2.3307
CDY1B	0.18362	0.18306	0.973807	1	-2.3288
CDY1	0.18362	0.18306	0.973807	1	-2.3288
CDY2B	0.18362	0.18306	0.973807	1	-2.3288
CDY2A	0.18362	0.18306	0.973807	1	-2.3288
GADD45B	0.18422	0.18366	0.973807	1	-2.3287
HEXIM1	0.18395	0.18338	0.973807	1	-2.3268
ZCCHC18	0.33144	0.34783	0.973807	1	-2.3266
hsa-mir-3689a	0.038641	0.069828	0.972677	1	-2.3257
MCIDAS	0.18435	0.18378	0.973807	1	-2.3256
BLZF1	0.18408	0.18351	0.973807	1	-2.3254
ZNF276	0.18489	0.18431	0.973807	1	-2.3254
GRK6	0.18502	0.18445	0.973807	1	-2.3233
CABP2	0.18515	0.18456	0.973807	1	-2.3228
FBLN1	0.18542	0.18484	0.973807	1	-2.3187
LDHB	0.18569	0.1851	0.973807	1	-2.316
NAGLU	0.18529	0.1847	0.973807	1	-2.3154
PLCG1	0.18622	0.18564	0.973807	1	-2.3152
ACO2	0.18689	0.18634	0.973807	1	-2.3146
OR8U1	0.18642	0.18585	0.973807	1	-2.3131
OR8U8	0.18642	0.18585	0.973807	1	-2.3131
PPHLN1	0.18729	0.18677	0.973807	1	-2.3128
HNRNPM	0.18662	0.18606	0.973807	1	-2.3125
RPL7L1	0.18702	0.18648	0.973807	1	-2.3116
ITPKC	0.18783	0.18729	0.973807	1	-2.3086
hsa-mir-378h	0.18823	0.18767	0.973807	1	-2.308
OLFML2A	0.18809	0.18755	0.973807	1	-2.3079
FAM3A	0.18849	0.18796	0.973807	1	-2.3068
AIDA	0.18796	0.18741	0.973807	1	-2.3053
hsa-mir-17	0.06738	0.11748	0.973807	1	-2.3047
IFNGR1	0.18876	0.18825	0.973807	1	-2.3035
LRRC56	0.18916	0.18869	0.973807	1	-2.3029
ACO1	0.1893	0.18884	0.973807	1	-2.3026
WNT3	0.1901	0.18965	0.973807	1	-2.2997
TNPO1	0.19023	0.18976	0.973807	1	-2.2992
OR2AE1	0.18983	0.18941	0.973807	1	-2.2986
ESPL1	0.18943	0.18896	0.973807	1	-2.2982
GJA5	0.18716	0.18664	0.973807	1	-2.2977
AHSP	0.19036	0.18989	0.973807	1	-2.2968
KCTD7	0.1905	0.19001	0.973807	1	-2.2924
hsa-mir-1912	0.19117	0.19067	0.973807	1	-2.2916
TAF13	0.18863	0.1881	0.973807	1	-2.2903
OR1B1	0.47059	0.50134	0.99375	1	-2.2886
QRICH2	0.1917	0.19122	0.973807	1	-2.2878
CSNK2A2	0.19183	0.19136	0.973807	1	-2.2847
MALSU1	0.19157	0.19109	0.973807	1	-2.2844
TMPRSS5	0.1921	0.19166	0.973807	1	-2.2832
FAN1	0.12029	0.18165	0.973807	1	-2.2814
UTRN	0.19224	0.19178	0.973807	1	-2.2802
GPR78	0.19237	0.19191	0.973807	1	-2.28
PALM	0.19264	0.19218	0.973807	1	-2.2759
EPHA8	0.19317	0.19272	0.973807	1	-2.2736
C6orf106	0.1925	0.19203	0.973807	1	-2.2731
C1RL	0.19277	0.19231	0.973807	1	-2.2712
SSX4B	0.19364	0.19314	0.973807	1	-2.2712
CIDEC	0.1933	0.19281	0.973807	1	-2.2708
SPATA12	0.19411	0.19355	0.973807	1	-2.2693
GTF2A1	0.19397	0.19344	0.973807	1	-2.2684
PAK2	0.19464	0.19404	0.973807	1	-2.2633
TARSL2	0.19451	0.19392	0.973807	1	-2.263
PRAMEF7	0.19498	0.19437	0.973807	1	-2.2624
PRAMEF8	0.19498	0.19437	0.973807	1	-2.2624
CCDC169	0.19551	0.19489	0.973807	1	-2.2614
CCDC169-SOHLH2	0.19551	0.19489	0.973807	1	-2.2614
DHRS7C	0.19531	0.19469	0.973807	1	-2.2605
FREM1	0.19518	0.19455	0.973807	1	-2.2601
GRHPR	0.19477	0.19418	0.973807	1	-2.258
ZNF75D	0.19598	0.19538	0.973807	1	-2.2549
SLC35A5	0.19611	0.19553	0.973807	1	-2.2537
KBTBD13	0.19584	0.19525	0.973807	1	-2.2536
KIAA1377	0.19638	0.19577	0.973807	1	-2.2536
WNT1	0.19651	0.19591	0.973807	1	-2.2531
hsa-mir-576	0.19718	0.19657	0.973807	1	-2.2507
GPX5	0.19705	0.19646	0.973807	1	-2.2506
GPR97	0.19678	0.19618	0.973807	1	-2.2498
KRTAP5-4	0.19665	0.19606	0.973807	1	-2.2497
CCDC3	0.19785	0.19726	0.973807	1	-2.2482
PSG6	0.19691	0.19632	0.973807	1	-2.2479
CHP1	0.19731	0.19671	0.973807	1	-2.2472
hsa-mir-3121	0.19825	0.19763	0.973807	1	-2.2466
LRIT2	0.19878	0.19812	0.973807	1	-2.2446
BTK	0.19838	0.19774	0.973807	1	-2.243
C3orf18	0.19905	0.19838	0.973807	1	-2.2355
IFT74	0.20025	0.19956	0.973807	1	-2.2353
KIF21A	0.21321	0.25231	0.973807	1	-2.2348
hsa-mir-4436b-2	0.19985	0.19917	0.973807	1	-2.2341
DMKN	0.20039	0.19969	0.973807	1	-2.2338
LAMTOR3	0.19852	0.19787	0.973807	1	-2.2311
RPS5	0.20092	0.20027	0.973807	1	-2.2311
POU4F2	0.51235	0.51275	0.99375	1	-2.2295
ZBTB3	0.20079	0.20011	0.973807	1	-2.2292
ANKIB1	0.20052	0.19981	0.973807	1	-2.2289
FOXB1	0.20119	0.20054	0.973807	1	-2.2252
GUCY2F	0.20146	0.20078	0.973807	1	-2.2249
hsa-mir-3120	0.20179	0.20112	0.973807	1	-2.2247
hsa-mir-214	0.20179	0.20112	0.973807	1	-2.2247
FCRL5	0.20212	0.20141	0.973807	1	-2.2219
NAT8B	0.20159	0.20091	0.973807	1	-2.2216
ACKR3	0.20246	0.20176	0.973807	1	-2.2199
CXCR7	0.20246	0.20176	0.973807	1	-2.2199
PRKAR2A	0.20279	0.20207	0.973807	1	-2.2173
C10orf128	0.20266	0.20193	0.973807	1	-2.2163
JUNB	0.20293	0.20223	0.973807	1	-2.2148
GPX7	0.20346	0.20278	0.973807	1	-2.2139
ENPEP	0.20319	0.2025	0.973807	1	-2.2134
TGM6	0.20359	0.20292	0.973807	1	-2.2121
SIPA1L1	0.20373	0.20303	0.973807	1	-2.212
ZNF517	0.20426	0.20359	0.973807	1	-2.204
hsa-mir-1204	0.20306	0.20237	0.973807	1	-2.2026
UNC119B	0.20506	0.20435	0.973807	1	-2.2022
CYP4F11	0.20547	0.20476	0.973807	1	-2.2018
UNC93A	0.20573	0.20503	0.973807	1	-2.2012
KIAA1143	0.20493	0.20424	0.973807	1	-2.2002
KIF1C	0.206	0.20526	0.973807	1	-2.1985
CYP2A7	0.20627	0.20551	0.973807	1	-2.1979
BRD3	0.2064	0.20565	0.973807	1	-2.1971
TTC7B	0.20653	0.2058	0.973807	1	-2.1954
CCDC137	0.2068	0.20606	0.973807	1	-2.195
hsa-mir-8074	0.20707	0.20634	0.973807	1	-2.194
AGO3	0.20694	0.20621	0.973807	1	-2.1939
KRTAP12-2	0.20587	0.20514	0.973807	1	-2.1937
SYBU	0.208	0.20727	0.973807	1	-2.1901
NODAL	0.20747	0.20674	0.973807	1	-2.1884
PLXNB1	0.20787	0.20714	0.973807	1	-2.1881
ABCA1	0.2056	0.2049	0.973807	1	-2.1867
TRIM63	0.20854	0.20773	0.973807	1	-2.185
OTOS	0.20613	0.2054	0.973807	1	-2.1841
YES1	0.20814	0.20738	0.973807	1	-2.1833
FAM204A	0.20907	0.20824	0.973807	1	-2.1816
CBX1	0.20667	0.20593	0.973807	1	-2.1814
METTL21A	0.20894	0.20812	0.973807	1	-2.181
ITM2B	0.20921	0.20838	0.973807	1	-2.1804
NLRP10	0.20881	0.20797	0.973807	1	-2.1793
AKAP10	0.2076	0.20688	0.973807	1	-2.1774
NELFB	0.20934	0.20851	0.973807	1	-2.1764
BUB1	0.50648	0.52818	0.996622	1	-2.1748
OR10H4	0.21041	0.20958	0.973807	1	-2.1707
CPM	0.21014	0.20932	0.973807	1	-2.1697
C4orf22	0.42211	0.42691	0.973807	1	-2.1691
PARP2	0.21028	0.20945	0.973807	1	-2.1689
GMNC	0.14073	0.1969	0.973807	1	-2.1675
SLC25A22	0.21054	0.20972	0.973807	1	-2.1675
ASNA1	0.21068	0.20986	0.973807	1	-2.165
G3BP2	0.21108	0.21025	0.973807	1	-2.1639
hsa-mir-4498	0.21161	0.21081	0.973807	1	-2.1639
MECP2	0.21081	0.21001	0.973807	1	-2.1637
SERPINA6	0.21094	0.21013	0.973807	1	-2.1627
DECR1	0.21121	0.21039	0.973807	1	-2.1616
hsa-mir-604	0.21175	0.21094	0.973807	1	-2.1594
UGT3A1	0.14765	0.20215	0.973807	1	-2.1587
SCN7A	0.21228	0.21148	0.973807	1	-2.1565
TAF1D	0.21215	0.21136	0.973807	1	-2.1549
MFSD10	0.21295	0.21214	0.973807	1	-2.1456
UBE2Z	0.21322	0.21238	0.973807	1	-2.1444
ZIM3	0.21348	0.21267	0.973807	1	-2.1431
FAIM2	0.21375	0.21294	0.973807	1	-2.1424
LONRF1	0.21362	0.21281	0.973807	1	-2.1421
USP3	0.21395	0.21314	0.973807	1	-2.1411
COL4A3BP	0.21395	0.21314	0.973807	1	-2.1411
CSK	0.21335	0.21252	0.973807	1	-2.1408
PDCD5	0.21415	0.21333	0.973807	1	-2.1387
SLC26A4	0.30518	0.32597	0.973807	1	-2.1382
POPDC3	0.21455	0.21374	0.973807	1	-2.1376
IRG1	0.21522	0.21439	0.973807	1	-2.1301
ZUFSP	0.21535	0.21452	0.973807	1	-2.1301
AQPEP	0.21602	0.21515	0.973807	1	-2.1279
MFAP2	0.21549	0.21467	0.973807	1	-2.1274
ARSE	0.21629	0.21541	0.973807	1	-2.1259
GML	0.21589	0.21501	0.973807	1	-2.1255
GAGE12B	0.52159	0.53995	0.996622	1	-2.1254
GAGE6	0.52159	0.53995	0.996622	1	-2.1254
GAGE5	0.52159	0.53995	0.996622	1	-2.1254
GAGE2A	0.52159	0.53995	0.996622	1	-2.1254
GAGE7	0.52159	0.53995	0.996622	1	-2.1254
FGF5	0.21656	0.21568	0.973807	1	-2.1254
GSG2	0.21642	0.21555	0.973807	1	-2.1252
MYBPC1	0.21936	0.21854	0.973807	1	-2.1241
PSMD14	0.21469	0.21389	0.973807	1	-2.123
hsa-mir-1184-1	0.2197	0.21883	0.973807	1	-2.1217
hsa-mir-1184-2	0.2197	0.21883	0.973807	1	-2.1217
PPIL6	0.21923	0.2184	0.973807	1	-2.1213
ZNF672	0.2195	0.21865	0.973807	1	-2.12
GRIK2	0.2199	0.21903	0.973807	1	-2.1192
KRTAP7-1	0.11553	0.17801	0.973807	1	-2.1162
ZNF83	0.22003	0.21916	0.973807	1	-2.1132
TALDO1	0.2203	0.21945	0.973807	1	-2.1123
MACROD2	0.22017	0.21931	0.973807	1	-2.1104
C12orf29	0.22057	0.21971	0.973807	1	-2.1075
hsa-mir-7106	0.22043	0.21959	0.973807	1	-2.1063
KCNA6	0.2207	0.21986	0.973807	1	-2.1041
TGM3	0.22083	0.21999	0.973807	1	-2.1037
IZUMO3	0.22097	0.22011	0.973807	1	-2.1028
EPS8	0.2215	0.22073	0.973807	1	-2.1001
ATF6	0.22137	0.22058	0.973807	1	-2.0987
LHX4	0.22217	0.2214	0.973807	1	-2.0977
FAM216B	0.22177	0.221	0.973807	1	-2.0974
OTUD3	0.2223	0.22153	0.973807	1	-2.0966
EMC8	0.22204	0.22127	0.973807	1	-2.0962
SLC16A5	0.22257	0.22181	0.973807	1	-2.0954
MCTP1	0.22244	0.22166	0.973807	1	-2.0943
KLHL13	0.22284	0.22211	0.973807	1	-2.0918
C8orf44	0.22311	0.22236	0.973807	1	-2.0856
IKBKG	0.22324	0.2225	0.973807	1	-2.0855
DDX3Y	0.2219	0.22114	0.973807	1	-2.0837
FAM154B	0.22417	0.22337	0.973807	1	-2.0837
TBL1Y	0.22351	0.22272	0.973807	1	-2.0814
TENM1	0.22431	0.22351	0.973807	1	-2.0791
SMARCB1	0.22484	0.22405	0.973807	1	-2.0718
CDKN1B	0.22471	0.22393	0.973807	1	-2.0714
EDA2R	0.22511	0.22432	0.973807	1	-2.0689
ZNF141	0.22524	0.22443	0.973807	1	-2.0676
hsa-mir-2276	0.40986	0.41571	0.973807	1	-2.0646
HSD17B6	0.22578	0.22499	0.973807	1	-2.0636
PARP8	0.22591	0.22512	0.973807	1	-2.0632
hsa-mir-1301	0.22551	0.2247	0.973807	1	-2.063
CA2	0.26634	0.29431	0.973807	1	-2.0609
NAIP	0.22645	0.22563	0.973807	1	-2.0577
FMN2	0.22671	0.22593	0.973807	1	-2.0553
WDR45	0.22564	0.22485	0.973807	1	-2.052
OR2T4	0.22685	0.22605	0.973807	1	-2.0505
RASGRP4	0.22658	0.22577	0.973807	1	-2.0488
SLC5A8	0.22725	0.22646	0.973807	1	-2.0486
AGTRAP	0.22738	0.2266	0.973807	1	-2.0474
ATOH1	0.22711	0.22631	0.973807	1	-2.0471
WDFY2	0.22752	0.22676	0.973807	1	-2.0459
AKNA	0.22778	0.22699	0.973807	1	-2.0451
ATP5D	0.22765	0.22688	0.973807	1	-2.0438
SLC17A6	0.22792	0.22714	0.973807	1	-2.0406
SEMG2	0.22845	0.2277	0.973807	1	-2.0303
FFAR1	0.22885	0.2281	0.973807	1	-2.0295
ACVR1B	0.22832	0.22758	0.973807	1	-2.029
U2AF2	0.22872	0.228	0.973807	1	-2.0274
TCOF1	0.43082	0.43495	0.973807	1	-2.025
LRRC48	0.22899	0.22823	0.973807	1	-2.025
TMEM225	0.22912	0.22834	0.973807	1	-2.0245
RGS16	0.22818	0.22745	0.973807	1	-2.0226
hsa-mir-6842	0.22965	0.22888	0.973807	1	-2.0187
PRSS42	0.22925	0.22849	0.973807	1	-2.0186
SAMD14	0.22939	0.22861	0.973807	1	-2.0177
DEFB128	0.22979	0.22901	0.973807	1	-2.0168
hsa-mir-4698	0.22992	0.22913	0.973807	1	-2.0154
ARHGEF9	0.23059	0.22985	0.973807	1	-2.0111
CACNA2D2	0.23032	0.22956	0.973807	1	-2.0093
CRIM1	0.23072	0.22998	0.973807	1	-2.0093
SREK1	0.23046	0.22971	0.973807	1	-2.0072
2024-12-01	0.23126	0.23056	0.973807	1	-2.0067
RANBP3	0.23152	0.23082	0.973807	1	-2.0036
IQCA1	0.23139	0.23069	0.973807	1	-2.0035
hsa-mir-3179-2	0.36009	0.37207	0.973807	1	-1.9989
hsa-mir-3179-1	0.36009	0.37207	0.973807	1	-1.9989
APPBP2	0.23099	0.23027	0.973807	1	-1.9971
SLC35A4	0.23193	0.2312	0.973807	1	-1.995
ZNF259	0.33715	0.41163	0.973807	1	-1.9944
GLA	0.23206	0.23132	0.973807	1	-1.9935
OR1C1	0.23233	0.23161	0.973807	1	-1.9923
COL15A1	0.23246	0.23173	0.973807	1	-1.992
CCDC108	0.23259	0.2319	0.973807	1	-1.9913
SLC44A5	0.23219	0.23147	0.973807	1	-1.9901
GPR22	0.23273	0.23203	0.973807	1	-1.9892
hsa-mir-3655	0.23313	0.23244	0.973807	1	-1.9873
TRPM7	0.23326	0.23256	0.973807	1	-1.987
CKMT2	0.23005	0.22928	0.973807	1	-1.9822
TMUB1	0.44504	0.44819	0.973807	1	-1.9819
PRR9	0.23366	0.23295	0.973807	1	-1.981
STK32C	0.23406	0.23338	0.973807	1	-1.9787
MMGT1	0.23286	0.23215	0.973807	1	-1.9773
FZD3	0.23473	0.234	0.973807	1	-1.9757
CAMTA1	0.23487	0.23412	0.973807	1	-1.975
KRTAP5-9	0.235	0.23428	0.973807	1	-1.9745
MADD	0.23433	0.23361	0.973807	1	-1.9738
MALL	0.2338	0.2331	0.973807	1	-1.9712
TCL1A	0.23527	0.23454	0.973807	1	-1.9705
LACRT	0.23393	0.23325	0.973807	1	-1.9697
hsa-mir-6752	0.23446	0.23374	0.973807	1	-1.9694
TSC22D1	0.2358	0.23508	0.973807	1	-1.967
SNAPIN	0.23607	0.23536	0.973807	1	-1.9639
DEFB124	0.2362	0.2355	0.973807	1	-1.9613
CSMD2	0.23513	0.23442	0.973807	1	-1.9604
GNRH2	0.23634	0.23565	0.973807	1	-1.9597
hsa-mir-5191	0.2354	0.23467	0.973807	1	-1.9588
FAM103A1	0.23647	0.23579	0.973807	1	-1.9581
IL18RAP	0.23714	0.23644	0.973807	1	-1.9566
UNC5CL	0.237	0.23633	0.973807	1	-1.9565
hsa-mir-562	0.23687	0.2362	0.973807	1	-1.9558
CTU2	0.23754	0.23687	0.973807	1	-1.9516
IGF2BP2	0.23767	0.237	0.973807	1	-1.947
IQGAP3	0.23794	0.23731	0.973807	1	-1.9448
CCL8	0.23807	0.23745	0.973807	1	-1.944
CFL1	0.23781	0.23714	0.973807	1	-1.9433
MTUS2	0.074336	0.12868	0.973807	1	-1.9397
CHST11	0.38559	0.39418	0.973807	1	-1.9368
EFR3A	0.34536	0.35978	0.973807	1	-1.9367
ZNF143	0.076136	0.13148	0.973807	1	-1.9365
ZNF382	0.23821	0.23757	0.973807	1	-1.9364
C9orf142	0.23834	0.2377	0.973807	1	-1.9336
MKRN1	0.23901	0.23838	0.973807	1	-1.9314
CALHM3	0.23847	0.23782	0.973807	1	-1.9302
ANXA10	0.23874	0.23811	0.973807	1	-1.9291
WFDC2	0.23928	0.23869	0.973807	1	-1.9235
PIGQ	0.25554	0.2857	0.973807	1	-1.9217
ADD1	0.23954	0.23893	0.973807	1	-1.9207
ASB5	0.50411	0.5047	0.99375	1	-1.9166
GARNL3	0.23994	0.23936	0.973807	1	-1.9113
DNAJC21	0.24021	0.23963	0.973807	1	-1.9095
GALP	0.24008	0.23949	0.973807	1	-1.9092
RNF186	0.24061	0.24003	0.973807	1	-1.909
EXOSC2	0.24048	0.23991	0.973807	1	-1.9088
FAHD2B	0.24075	0.24017	0.973807	1	-1.9074
hsa-mir-891b	0.24088	0.24031	0.973807	1	-1.9073
ACAT1	0.084849	0.1456	0.973807	1	-1.9064
ANKRD50	0.44683	0.44994	0.973807	1	-1.9056
KAAG1	0.24101	0.24044	0.973807	1	-1.9055
hsa-mir-3622a	0.24135	0.24078	0.973807	1	-1.903
hsa-mir-3622b	0.24135	0.24078	0.973807	1	-1.903
hsa-mir-217	0.24168	0.2411	0.973807	1	-1.9026
RNF207	0.24115	0.24058	0.973807	1	-1.9024
LINGO1	0.24155	0.24097	0.973807	1	-1.8956
SYCP1	0.24208	0.24147	0.973807	1	-1.8948
RASA3	0.24235	0.24173	0.973807	1	-1.8884
MUC22	0.24181	0.24121	0.973807	1	-1.8872
TMEM207	0.24315	0.24251	0.973807	1	-1.8867
CEP170B	0.24262	0.24198	0.973807	1	-1.8858
ADCY1	0.24302	0.24237	0.973807	1	-1.8851
PDCD2	0.24195	0.24133	0.973807	1	-1.8839
ARL16	0.24382	0.2432	0.973807	1	-1.8793
PTPRN	0.24395	0.24333	0.973807	1	-1.8771
CDH22	0.24355	0.24295	0.973807	1	-1.877
SGPL1	0.24328	0.24267	0.973807	1	-1.8767
CBFA2T2	0.24369	0.24307	0.973807	1	-1.8767
DDR1	0.092504	0.15807	0.973807	1	-1.8734
JMY	0.24435	0.24378	0.973807	1	-1.8715
ABCA10	0.24489	0.24433	0.973807	1	-1.866
ZNF527	0.24409	0.24346	0.973807	1	-1.8658
GLIPR1	0.24449	0.24393	0.973807	1	-1.8644
TSPAN15	0.24502	0.24445	0.973807	1	-1.8628
OR9G4	0.039034	0.070479	0.973204	1	-1.8626
UBALD1	0.24422	0.24362	0.973807	1	-1.8625
BAK1	0.24529	0.24471	0.973807	1	-1.8622
UBE2QL1	0.24516	0.24458	0.973807	1	-1.8619
FANK1	0.24542	0.24484	0.973807	1	-1.8604
XRCC3	0.24569	0.24511	0.973807	1	-1.8592
IBTK	0.45928	0.46149	0.973807	1	-1.8555
INTS2	0.57172	0.58051	0.996622	1	-1.8544
TIMM17B	0.47276	0.47441	0.973807	1	-1.8541
UVSSA	0.24649	0.24588	0.973807	1	-1.8509
MBD3L2	0.24663	0.24603	0.973807	1	-1.8496
ASB6	0.24636	0.24575	0.973807	1	-1.8486
KRTAP4-5	0.24716	0.24662	0.973807	1	-1.8481
SMPDL3A	0.24689	0.24631	0.973807	1	-1.8457
SNTA1	0.24729	0.24677	0.973807	1	-1.844
FBXO48	0.24743	0.24688	0.973807	1	-1.8426
SHD	0.17507	0.22292	0.973807	1	-1.8403
NEU3	0.24783	0.24725	0.973807	1	-1.8397
hsa-mir-4427	0.24769	0.24713	0.973807	1	-1.8323
SMIM9	0.2481	0.24751	0.973807	1	-1.8316
CLIC2	0.24756	0.24701	0.973807	1	-1.8289
TUSC5	0.24823	0.24765	0.973807	1	-1.8285
MTCH2	0.2485	0.24793	0.973807	1	-1.8285
OCIAD2	0.24836	0.24778	0.973807	1	-1.8282
STX17	0.093776	0.16008	0.973807	1	-1.826
ACHE	0.24876	0.24817	0.973807	1	-1.8243
STXBP2	0.2489	0.24831	0.973807	1	-1.8234
COMMD8	0.2493	0.2487	0.973807	1	-1.8234
GRIN1	0.24943	0.24883	0.973807	1	-1.8228
FAM25C	0.24977	0.24913	0.973807	1	-1.8207
FAM25G	0.24977	0.24913	0.973807	1	-1.8207
APOBEC1	0.28001	0.30529	0.973807	1	-1.8198
POGK	0.25023	0.24959	0.973807	1	-1.8116
WDFY3	0.2509	0.2503	0.973807	1	-1.81
DCAF12	0.25037	0.24973	0.973807	1	-1.8097
OR2B3	0.24997	0.24932	0.973807	1	-1.8081
FGF8	0.25077	0.25016	0.973807	1	-1.8079
PRKAR2B	0.2505	0.24987	0.973807	1	-1.8068
SASS6	0.25063	0.25001	0.973807	1	-1.8067
ZDHHC8	0.25104	0.25042	0.973807	1	-1.8063
YBX2	0.2517	0.25111	0.973807	1	-1.8053
KYNU	0.25197	0.25139	0.973807	1	-1.8043
COQ6	0.25157	0.25096	0.973807	1	-1.8033
ATP5S	0.25237	0.25176	0.973807	1	-1.8009
SOD3	0.25224	0.25164	0.973807	1	-1.7979
CYP2U1	0.24863	0.24807	0.973807	1	-1.7972
PCDHB2	0.2513	0.2507	0.973807	1	-1.7963
CUL4B	0.25264	0.25203	0.973807	1	-1.796
ALPPL2	0.043632	0.04373	0.961961	1	-1.7942
UTP6	0.25277	0.25216	0.973807	1	-1.7932
TBC1D13	0.25304	0.2524	0.973807	1	-1.7914
RPAP3	0.2521	0.25152	0.973807	1	-1.791
TRADD	0.25371	0.25303	0.973807	1	-1.7861
CLRN1	0.25357	0.25291	0.973807	1	-1.7849
CHEK1	0.20775	0.24805	0.973807	1	-1.7818
SRCIN1	0.24489	0.27719	0.973807	1	-1.7799
RBPJL	0.31296	0.33229	0.973807	1	-1.7674
BEX2	0.25411	0.25342	0.973807	1	-1.7646
LMO7	0.25424	0.25356	0.973807	1	-1.7629
CXCL14	0.25451	0.2538	0.973807	1	-1.7629
GPR19	0.25478	0.25408	0.973807	1	-1.7614
BEST4	0.25491	0.25423	0.973807	1	-1.7613
OTUB1	0.1263	0.18622	0.973807	1	-1.7607
hsa-mir-5694	0.25531	0.25462	0.973807	1	-1.7541
COX7C	0.25585	0.25518	0.973807	1	-1.7503
CYP3A7	0.049713	0.049913	0.961961	1	-1.7481
CYP3A7-CYP3AP1	0.049713	0.049913	0.961961	1	-1.7481
KRT38	0.25545	0.25476	0.973807	1	-1.7473
ETFA	0.40739	0.41349	0.973807	1	-1.7462
hsa-mir-138-1	0.25651	0.25586	0.973807	1	-1.7454
SFRP2	0.25611	0.25545	0.973807	1	-1.7441
PDXP	0.25732	0.25673	0.973807	1	-1.7433
ARL5C	0.25558	0.2549	0.973807	1	-1.7397
CUL3	0.25705	0.25644	0.973807	1	-1.7383
hsa-mir-6796	0.25638	0.25572	0.973807	1	-1.7375
RGCC	0.25745	0.25687	0.973807	1	-1.7366
DNAJB7	0.138	0.19486	0.973807	1	-1.7358
KPNB1	0.25772	0.25718	0.973807	1	-1.7307
GCC2	0.25798	0.25749	0.973807	1	-1.728
CLEC1A	0.25758	0.25702	0.973807	1	-1.7268
PALM2-AKAP2	0.25859	0.25809	0.973807	1	-1.7172
PALM2	0.25859	0.25809	0.973807	1	-1.7172
WNT2B	0.25959	0.25908	0.973807	1	-1.7132
MPDU1	0.25905	0.25854	0.973807	1	-1.7126
SBK1	0.25972	0.25923	0.973807	1	-1.7122
hsa-mir-328	0.26012	0.25963	0.973807	1	-1.709
NEDD9	0.25879	0.25827	0.973807	1	-1.7085
KRT39	0.25932	0.25882	0.973807	1	-1.7085
MTHFD2L	0.25892	0.25839	0.973807	1	-1.7084
hsa-mir-4677	0.26039	0.2599	0.973807	1	-1.7076
DGKQ	0.26026	0.25978	0.973807	1	-1.7075
COL23A1	0.26066	0.26013	0.973807	1	-1.7069
CNR1	0.25986	0.25935	0.973807	1	-1.7056
WDR77	0.25919	0.25868	0.973807	1	-1.7048
ZNF747	0.26052	0.26002	0.973807	1	-1.7039
hsa-mir-6128	0.26092	0.2604	0.973807	1	-1.7009
YPEL5	0.25999	0.25949	0.973807	1	-1.7004
hsa-mir-4263	0.26119	0.26068	0.973807	1	-1.6994
LOC100288255	0.078061	0.13458	0.973807	1	-1.697
FRG2	0.078061	0.13458	0.973807	1	-1.697
FAM189A1	0.26146	0.26099	0.973807	1	-1.6938
CLPSL2	0.4585	0.46082	0.973807	1	-1.6927
FAM199X	0.26159	0.26111	0.973807	1	-1.6924
TGM4	0.26106	0.26055	0.973807	1	-1.6918
GSAP	0.31893	0.33723	0.973807	1	-1.6902
CACNB3	0.26173	0.26124	0.973807	1	-1.6889
ARPC3	0.26186	0.26136	0.973807	1	-1.6866
GNG11	0.26306	0.26259	0.973807	1	-1.6754
MTG1	0.44345	0.44671	0.973807	1	-1.675
MXRA8	0.2632	0.26272	0.973807	1	-1.6745
hsa-mir-8073	0.16923	0.21854	0.973807	1	-1.6743
POTED	0.22514	0.26159	0.973807	1	-1.673
OR1L8	0.26293	0.26244	0.973807	1	-1.6724
RANGAP1	0.26373	0.26325	0.973807	1	-1.6672
KIAA0317	0.2644	0.26392	0.973807	1	-1.6628
PRELID2	0.264	0.26352	0.973807	1	-1.6577
ERCC4	0.26427	0.26381	0.973807	1	-1.6566
PTPRC	0.062876	0.062715	0.97144	1	-1.6565
MRPL49	0.26493	0.26448	0.973807	1	-1.6542
GJA4	0.26507	0.26464	0.973807	1	-1.6535
TRNT1	0.26453	0.26404	0.973807	1	-1.653
NOP14	0.26533	0.26495	0.973807	1	-1.6521
BIRC5	0.2648	0.26432	0.973807	1	-1.6503
TLR8	0.067419	0.067294	0.972677	1	-1.634
RARB	0.26654	0.26612	0.973807	1	-1.6322
RPRM	0.26694	0.26653	0.973807	1	-1.6299
STMN4	0.2668	0.2664	0.973807	1	-1.6289
DGAT2	0.26707	0.26667	0.973807	1	-1.6272
FLII	0.26734	0.26693	0.973807	1	-1.6255
NUP210L	0.071963	0.071784	0.973204	1	-1.625
ZNF395	0.26747	0.26705	0.973807	1	-1.6237
hsa-mir-4297	0.26761	0.26719	0.973807	1	-1.6235
hsa-mir-8062	0.26774	0.26732	0.973807	1	-1.6167
SLC38A2	0.26854	0.26813	0.973807	1	-1.614
TBC1D7	0.26801	0.26761	0.973807	1	-1.6136
SLC25A13	0.26721	0.26681	0.973807	1	-1.6133
SUSD3	0.26841	0.26801	0.973807	1	-1.6119
hsa-mir-499a	0.26814	0.26776	0.973807	1	-1.6071
PLA2G6	0.26881	0.26844	0.973807	1	-1.6055
C1QL3	0.20704	0.24748	0.973807	1	-1.6013
LTA	0.26908	0.26871	0.973807	1	-1.5956
MROH8	0.26961	0.2692	0.973807	1	-1.5925
TLDC2	0.26827	0.26788	0.973807	1	-1.589
SEMA3A	0.27001	0.2696	0.973807	1	-1.5885
KRTAP9-4	0.27028	0.26985	0.973807	1	-1.5882
NRG3	0.27015	0.26973	0.973807	1	-1.5873
LECT1	0.26948	0.26909	0.973807	1	-1.5851
ITGA11	0.27041	0.26999	0.973807	1	-1.5841
ELFN1	0.45416	0.48968	0.977278	1	-1.58
ZNF641	0.27081	0.2704	0.973807	1	-1.577
CERCAM	0.27095	0.27053	0.973807	1	-1.5745
OR8B4	0.27108	0.27067	0.973807	1	-1.5698
hsa-mir-7-2	0.50288	0.50354	0.99375	1	-1.5679
BEND7	0.27135	0.27093	0.973807	1	-1.5634
TTR	0.23534	0.26963	0.973807	1	-1.5617
ZBTB40	0.24001	0.27331	0.973807	1	-1.558
TWSG1	0.27162	0.27121	0.973807	1	-1.5564
PIGV	0.27188	0.27148	0.973807	1	-1.556
HTR1D	0.27215	0.27176	0.973807	1	-1.5521
PREPL	0.27228	0.2719	0.973807	1	-1.546
ENPP3	0.27255	0.2722	0.973807	1	-1.545
hsa-mir-7846	0.05547	0.098052	0.973807	1	-1.5441
YAE1D1	0.27268	0.27234	0.973807	1	-1.544
ZNF577	0.27282	0.27246	0.973807	1	-1.5439
TMSB15A	0.093879	0.093585	0.973807	1	-1.5407
SDF2L1	0.27362	0.27325	0.973807	1	-1.5366
EPHX4	0.27322	0.27284	0.973807	1	-1.5359
EBPL	0.27349	0.27312	0.973807	1	-1.5352
ZC3HAV1L	0.27415	0.27381	0.973807	1	-1.5342
FAM129C	0.18306	0.22903	0.973807	1	-1.5321
API5	0.27335	0.27297	0.973807	1	-1.5317
hsa-mir-1229	0.27429	0.27394	0.973807	1	-1.5304
WDHD1	0.27456	0.27421	0.973807	1	-1.529
UPRT	0.27442	0.27408	0.973807	1	-1.5263
SUDS3	0.27469	0.27434	0.973807	1	-1.525
NUP43	0.27482	0.27448	0.973807	1	-1.5238
PHB2	0.36829	0.37909	0.973807	1	-1.5208
UGT1A3	0.20941	0.24926	0.973807	1	-1.5168
UGT1A5	0.20941	0.24926	0.973807	1	-1.5168
UGT1A6	0.20941	0.24926	0.973807	1	-1.5168
UGT1A4	0.20941	0.24926	0.973807	1	-1.5168
UGT1A10	0.20941	0.24926	0.973807	1	-1.5168
UGT1A7	0.20941	0.24926	0.973807	1	-1.5168
UGT1A9	0.20941	0.24926	0.973807	1	-1.5168
UGT1A8	0.20941	0.24926	0.973807	1	-1.5168
PEX26	0.27669	0.27637	0.973807	1	-1.5151
CDKN1C	0.27509	0.27477	0.973807	1	-1.5135
BPHL	0.27683	0.27649	0.973807	1	-1.5117
INPP1	0.27522	0.27488	0.973807	1	-1.5087
hsa-mir-3166	0.27709	0.27672	0.973807	1	-1.5072
GOSR1	0.27723	0.27686	0.973807	1	-1.5047
KBTBD6	0.2775	0.27711	0.973807	1	-1.5025
CA10	0.27776	0.27735	0.973807	1	-1.494
ARL4D	0.27763	0.27723	0.973807	1	-1.4927
PLGRKT	0.27843	0.27802	0.973807	1	-1.4863
NADK	0.2783	0.27787	0.973807	1	-1.4846
ALPP	0.21172	0.32494	0.973807	1	-1.4807
MYL2	0.23644	0.35122	0.973807	1	-1.4807
SPANXD	0.28221	0.37816	0.973807	1	-1.4807
GPR65	0.27897	0.27852	0.973807	1	-1.4798
MYBL2	0.2779	0.27749	0.973807	1	-1.479
ARID2	0.2791	0.27864	0.973807	1	-1.4786
NEK4	0.34016	0.35546	0.973807	1	-1.4759
TAOK1	0.27883	0.27838	0.973807	1	-1.4743
KLF1	0.29535	0.31777	0.973807	1	-1.4738
C2orf42	0.27977	0.27931	0.973807	1	-1.4709
hsa-mir-6089-1	0.2801	0.27963	0.973807	1	-1.4642
hsa-mir-6089-2	0.2801	0.27963	0.973807	1	-1.4642
IL3RA_Y	0.35687	0.36935	0.973807	1	-1.4617
IL3RA_X	0.35687	0.36935	0.973807	1	-1.4617
CASC4	0.12074	0.12022	0.973807	1	-1.4616
PAIP1	0.2803	0.27984	0.973807	1	-1.4599
PPIE	0.28044	0.27997	0.973807	1	-1.4569
EIF2B5	0.28124	0.28073	0.973807	1	-1.4544
OR5P3	0.12462	0.12413	0.973807	1	-1.4514
CAND2	0.2811	0.28061	0.973807	1	-1.448
NDC1	0.28157	0.28103	0.973807	1	-1.4458
TMEM48	0.28157	0.28103	0.973807	1	-1.4458
VPS52	0.28231	0.28175	0.973807	1	-1.4432
BTG2	0.28257	0.28199	0.973807	1	-1.4426
OR2A42	0.28244	0.28187	0.973807	1	-1.4417
LBX1	0.28284	0.28222	0.973807	1	-1.4416
hsa-mir-7852	0.28324	0.28261	0.973807	1	-1.4344
PITX1	0.28271	0.28209	0.973807	1	-1.4342
PSMD2	0.28311	0.28248	0.973807	1	-1.432
CKLF-CMTM1	0.32179	0.33959	0.973807	1	-1.4295
CHRFAM7A	0.28338	0.28276	0.973807	1	-1.4247
TRIM29	0.28364	0.28302	0.973807	1	-1.4213
SLC34A2	0.24466	0.27699	0.973807	1	-1.4188
ATM	0.28378	0.28316	0.973807	1	-1.4163
hsa-mir-4714	0.28404	0.28343	0.973807	1	-1.4151
FAM154A	0.28431	0.2837	0.973807	1	-1.4006
DEF6	0.28418	0.28357	0.973807	1	-1.4003
EXOC6	0.1464	0.14607	0.973807	1	-1.3964
hsa-mir-568	0.30897	0.32898	0.973807	1	-1.3955
PRAMEF16	0.28444	0.28383	0.973807	1	-1.386
TMEM74	0.28551	0.28493	0.973807	1	-1.3778
C17orf75	0.28538	0.28478	0.973807	1	-1.3768
NFKBIB	0.06451	0.12458	0.973807	1	-1.374
RNF122	0.28578	0.28517	0.973807	1	-1.366
CANT1	0.28605	0.28545	0.973807	1	-1.366
FGD3	0.28645	0.28588	0.973807	1	-1.3627
TMEM95	0.35934	0.37143	0.973807	1	-1.3602
HORMAD2	0.28591	0.2853	0.973807	1	-1.3591
OR4A16	0.28658	0.28599	0.973807	1	-1.353
DSG2	0.28738	0.28682	0.973807	1	-1.3523
NUS1	0.28698	0.28638	0.973807	1	-1.352
RNPS1	0.39727	0.40455	0.973807	1	-1.3513
CT47A8	0.63964	0.64065	0.996622	1	-1.3481
CT47A4	0.63964	0.64065	0.996622	1	-1.3481
CT47A7	0.63964	0.64065	0.996622	1	-1.3481
CT47A6	0.63964	0.64065	0.996622	1	-1.3481
CT47A12	0.63964	0.64065	0.996622	1	-1.3481
CT47A2	0.63964	0.64065	0.996622	1	-1.3481
CT47A1	0.63964	0.64065	0.996622	1	-1.3481
CT47A11	0.63964	0.64065	0.996622	1	-1.3481
CT47A10	0.63964	0.64065	0.996622	1	-1.3481
CT47A3	0.63964	0.64065	0.996622	1	-1.3481
CT47A5	0.63964	0.64065	0.996622	1	-1.3481
CT47A9	0.63964	0.64065	0.996622	1	-1.3481
INPPL1	0.28939	0.28882	0.973807	1	-1.3462
TMEM132E	0.28926	0.28871	0.973807	1	-1.3449
BRINP2	0.29006	0.28945	0.973807	1	-1.3427
ORC3	0.28966	0.28907	0.973807	1	-1.3417
SCML2	0.29019	0.28956	0.973807	1	-1.3409
CD320	0.28952	0.28895	0.973807	1	-1.3407
hsa-mir-548w	0.31008	0.32986	0.973807	1	-1.3395
MS4A15	0.29059	0.28994	0.973807	1	-1.3388
GAREML	0.28752	0.28697	0.973807	1	-1.3314
FDXACB1	0.29073	0.29005	0.973807	1	-1.3311
SNX8	0.29099	0.29029	0.973807	1	-1.3304
CAPN12	0.29086	0.29017	0.973807	1	-1.3283
hsa-mir-2392	0.29139	0.2907	0.973807	1	-1.3257
hsa-mir-21	0.29153	0.29082	0.973807	1	-1.3247
CRISP3	0.43925	0.44271	0.973807	1	-1.3237
IMP4	0.33537	0.35122	0.973807	1	-1.3233
C17orf59	0.29126	0.29057	0.973807	1	-1.3232
hsa-mir-519b	0.292	0.29127	0.973807	1	-1.3217
hsa-mir-518d	0.292	0.29127	0.973807	1	-1.3217
hsa-mir-520g	0.292	0.29127	0.973807	1	-1.3217
hsa-mir-520h	0.292	0.29127	0.973807	1	-1.3217
SLC12A6	0.28992	0.28932	0.973807	1	-1.3194
POLR3C	0.29246	0.29171	0.973807	1	-1.3179
TMUB2	0.38076	0.38982	0.973807	1	-1.3139
NR2E3	0.29326	0.29251	0.973807	1	-1.31
hsa-mir-4420	0.2934	0.29265	0.973807	1	-1.3078
TCF19	0.29286	0.29212	0.973807	1	-1.3074
TMEM192	0.2926	0.29187	0.973807	1	-1.3067
RAB11FIP5	0.2938	0.29309	0.973807	1	-1.3055
HIST1H2BO	0.6466	0.6472	0.996622	1	-1.3043
MAP2K4	0.29353	0.2928	0.973807	1	-1.3029
GSC2	0.48242	0.48345	0.973807	1	-1.2972
NMNAT2	0.29407	0.29336	0.973807	1	-1.2952
hsa-mir-1302-11	0.18595	0.18539	0.973807	1	-1.2894
hsa-mir-1302-2	0.18595	0.18539	0.973807	1	-1.2894
hsa-mir-1302-10	0.18595	0.18539	0.973807	1	-1.2894
SRGAP1	0.29447	0.29379	0.973807	1	-1.2886
OR4C3	0.29433	0.29365	0.973807	1	-1.2874
AQP10	0.2942	0.2935	0.973807	1	-1.2865
hsa-mir-188	0.29473	0.29411	0.973807	1	-1.2862
hsa-mir-6821	0.29527	0.29464	0.973807	1	-1.2826
TMEM2	0.2946	0.29396	0.973807	1	-1.2817
PRPF18	0.29554	0.29492	0.973807	1	-1.2734
ALG2	0.29567	0.29505	0.973807	1	-1.2689
TRIM16L	0.45574	0.45822	0.973807	1	-1.2643
PET112	0.29607	0.29543	0.973807	1	-1.2567
GPR133	0.29647	0.29582	0.973807	1	-1.2555
HIBCH	0.29594	0.2953	0.973807	1	-1.2536
MUSTN1	0.29634	0.29569	0.973807	1	-1.2516
ZNF518B	0.12455	0.18489	0.973807	1	-1.2444
FAM174A	0.2962	0.29557	0.973807	1	-1.2442
ZNF404	0.29687	0.29623	0.973807	1	-1.2387
ODF1	0.19029	0.23473	0.973807	1	-1.2346
RBAK-LOC389458	0.026681	0.048748	0.961961	1	-1.2246
hsa-mir-19b-2	0.29741	0.2968	0.973807	1	-1.2234
SLC16A3	0.44604	0.44913	0.973807	1	-1.2116
RBM48	0.29808	0.29745	0.973807	1	-1.2047
LMAN2L	0.29861	0.29797	0.973807	1	-1.2026
TNFSF11	0.29874	0.2981	0.973807	1	-1.1992
FAM133B	0.29941	0.29878	0.973807	1	-1.1973
DIDO1	0.29968	0.29908	0.973807	1	-1.19
UROS	0.42678	0.43114	0.973807	1	-1.1839
ASAH2	0.22123	0.22043	0.973807	1	-1.1807
TNK1	0.29955	0.29892	0.973807	1	-1.1804
CADM3	0.30008	0.29949	0.973807	1	-1.179
PLEKHF2	0.30021	0.29963	0.973807	1	-1.1761
DES	0.30075	0.30018	0.973807	1	-1.1752
hsa-mir-128-1	0.30035	0.29976	0.973807	1	-1.1702
TRIM5	0.29981	0.29922	0.973807	1	-1.17
hsa-mir-4505	0.30115	0.30056	0.973807	1	-1.1698
ST6GALNAC4	0.22498	0.22418	0.973807	1	-1.1655
RRAGA	0.30182	0.30123	0.973807	1	-1.141
PPBP	0.30222	0.30164	0.973807	1	-1.1386
MBD3L3	0.47972	0.50796	0.99375	1	-1.1335
FGR	0.30262	0.30203	0.973807	1	-1.1327
hsa-mir-4518	0.30208	0.30151	0.973807	1	-1.1326
CERS3	0.30295	0.30235	0.973807	1	-1.1245
MBD5	0.30355	0.30293	0.973807	1	-1.1202
PPARG	0.18788	0.23283	0.973807	1	-1.1163
hsa-mir-3939	0.30396	0.30337	0.973807	1	-1.1102
SGSH	0.44922	0.45214	0.973807	1	-1.1067
VCY	0.30442	0.30384	0.973807	1	-1.1049
VCX	0.30442	0.30384	0.973807	1	-1.1049
VCY1B	0.30442	0.30384	0.973807	1	-1.1049
VCX2	0.30442	0.30384	0.973807	1	-1.1049
MRPL39	0.30382	0.30321	0.973807	1	-1.1041
PRTN3	0.30369	0.30307	0.973807	1	-1.1035
POLE3	0.23887	0.23825	0.973807	1	-1.0956
TMEM231	0.23914	0.23853	0.973807	1	-1.0934
APMAP	0.30529	0.30472	0.973807	1	-1.0818
OR1A2	0.50109	0.50177	0.99375	1	-1.0751
hsa-mir-95	0.30583	0.3052	0.973807	1	-1.0745
GTF2H2D	0.24342	0.24281	0.973807	1	-1.0693
STARD3	0.30569	0.30509	0.973807	1	-1.0658
OPN4	0.24582	0.24526	0.973807	1	-1.0589
NOP56	0.30676	0.30613	0.973807	1	-1.0552
RPS21	0.30609	0.30546	0.973807	1	-1.0512
RGPD6	0.52155	0.522	0.996622	1	-1.0504
RGPD5	0.52155	0.522	0.996622	1	-1.0504
RGPD8	0.52155	0.522	0.996622	1	-1.0504
DAG1	0.3077	0.30708	0.973807	1	-1.034
NEGR1	0.46164	0.46379	0.973807	1	-1.0337
ZNF732	0.25251	0.2519	0.973807	1	-1.0284
ADCY9	0.30756	0.30697	0.973807	1	-1.0281
EPM2AIP1	0.46926	0.47103	0.973807	1	-1.0234
EPB41L4A	0.16655	0.21655	0.973807	1	-1.0209
HSPB7	0.30877	0.30808	0.973807	1	-1.0152
hsa-mir-4761	0.30917	0.30845	0.973807	1	-1.014
MEX3C	0.25464	0.25394	0.973807	1	-1.0123
[truncated: 1,223 more rows]

## Sheet: MAGeCK (peritoneum vs primary)
Supplementary Table 1. Genes with sgRNA(s) enriched in the primary OC xenograft cells
Gene ID	Score	P value	FDR	Good sgRNA number	Log2 (fold change, Dissminated/Primary OC)
hsa-mir-6715b	0.010672	0.028134	0.957043	3	-7.3629
hsa-mir-6715a	0.010672	0.028134	0.957043	3	-7.3629
ACSM1	0.021971	0.055913	0.978376	3	-6.0187
SSBP2	0.0077195	0.020668	0.926599	3	-5.9532
SLC26A7	0.016752	0.043348	0.973737	3	-5.7861
INTS2	0.033734	0.083565	0.978376	3	-5.1896
HEATR1	0.11274	0.2452	0.978376	3	-3.4727
CCL19	0.0064241	0.012276	0.915794	2	-7.9983
NBL1	0.0055948	0.010743	0.915794	2	-7.1648
C1orf151-NBL1	0.0055948	0.010743	0.915794	2	-7.1648
VCX3B	0.0073334	0.013884	0.915794	2	-6.7253
hsa-mir-3689b	0.032875	0.05983	0.978376	2	-6.5211
TMUB1	0.012514	0.023589	0.947033	2	-6.4852
NOD1	0.025973	0.047724	0.978376	2	-6.4441
ZNF213	0.017134	0.032165	0.957043	2	-6.3952
LAYN	0.0076652	0.014529	0.915794	2	-6.3083
hsa-mir-4684	0.008351	0.015832	0.926599	2	-6.2953
hsa-mir-3689e	0.018939	0.035336	0.95878	2	-6.2551
KISS1	0.011872	0.022401	0.934004	2	-6.1162
TDRD3	0.0062977	0.012043	0.915794	2	-6.0965
FREM3	0.0096023	0.018112	0.926599	2	-6.0565
LTA4H	0.016687	0.031301	0.957043	2	-6.0495
hsa-mir-4453	0.012722	0.023939	0.947033	2	-6.0235
KCNA4	0.014383	0.027007	0.952065	2	-5.9546
PET117	0.0098893	0.018655	0.926599	2	-5.9535
ACAD9	0.023197	0.042846	0.973737	2	-5.9494
AGBL3	0.014927	0.027978	0.957043	2	-5.9123
ANKRD29	0.015251	0.028574	0.957043	2	-5.9047
C9orf47	0.01898	0.035401	0.95878	2	-5.8452
TAOK2	0.017692	0.033131	0.95878	2	-5.8245
ZNF493	0.0048837	0.0094087	0.915794	2	-5.81
PLEKHB1	0.013264	0.024971	0.947033	2	-5.7524
hsa-mir-106a	0.029765	0.054399	0.978376	2	-5.7271
KLK2	0.071544	0.12453	0.978376	2	-5.7259
MID1IP1	0.024038	0.044356	0.977614	2	-5.7205
PCDHGA3	0.01304	0.024525	0.947033	2	-5.7173
GABRB1	0.0035649	0.0068691	0.864718	2	-5.6554
OR5B12	0.022637	0.041863	0.973737	2	-5.6417
OR51A2	0.0051778	0.009938	0.915794	2	-5.6326
LILRB3	0.02348	0.043356	0.973737	2	-5.6074
EPB41L4A	0.036038	0.065271	0.978376	2	-5.4562
MTUS2	0.0067284	0.012819	0.915794	2	-5.4213
GPR33	0.067205	0.1562	0.978376	2	-5.3816
SAR1B	0.057658	0.10169	0.978376	2	-5.3397
OR52K1	0.11082	0.24167	0.978376	2	-5.3143
MPP3	0.03634	0.065782	0.978376	2	-5.3087
LUZP2	0.097287	0.16605	0.978376	2	-5.306
ADH5	0.033525	0.060981	0.978376	2	-5.2903
TEC	0.10455	0.17729	0.978376	2	-5.2734
NDUFA9	0.021686	0.040157	0.973737	2	-5.2437
MDFI	0.031382	0.057179	0.978376	2	-5.2196
DHX57	0.040695	0.073202	0.978376	2	-5.1344
MYZAP	0.062088	0.10889	0.978376	2	-5.0475
GCOM1	0.062088	0.10889	0.978376	2	-5.0475
hsa-mir-512-2	0.062088	0.10889	0.978376	2	-5.0313
hsa-mir-512-1	0.062088	0.10889	0.978376	2	-5.0313
GLB1L2	0.042039	0.0754	0.978376	2	-5.0131
SLC22A5	0.086965	0.14946	0.978376	2	-4.9978
LMTK3	0.036441	0.065944	0.978376	2	-4.9921
SUMF2	0.046886	0.083645	0.978376	2	-4.9425
SCNN1A	0.029719	0.054326	0.978376	2	-4.9356
PLK3	0.03629	0.065688	0.978376	2	-4.8529
WWTR1	0.064346	0.11276	0.978376	2	-4.8362
hsa-mir-5589	0.050918	0.09041	0.978376	2	-4.804
DOCK7	0.045551	0.081378	0.978376	2	-4.8038
CSRP2	0.03705	0.06698	0.978376	2	-4.7753
MEOX2	0.079115	0.13677	0.978376	2	-4.7744
DNAJB9	0.035888	0.065014	0.978376	2	-4.7687
EFCAB13	0.037764	0.068173	0.978376	2	-4.7216
ZNF625	0.060452	0.10625	0.978376	2	-4.7088
C19orf44	0.041769	0.074915	0.978376	2	-4.7024
ODF1	0.045805	0.081804	0.978376	2	-4.6233
TMIE	0.055024	0.097298	0.978376	2	-4.615
CHST11	0.053577	0.094827	0.978376	2	-4.5294
hsa-mir-4711	0.059226	0.10429	0.978376	2	-4.4992
ASUN	0.080954	0.13976	0.978376	2	-4.4967
CTBS	0.047288	0.084262	0.978376	2	-4.4785
hsa-mir-6083	0.054869	0.097038	0.978376	2	-4.4715
APOBEC1	0.036012	0.065216	0.978376	2	-4.459
FAAH2	0.080954	0.13976	0.978376	2	-4.3953
hsa-mir-3689a	0.018939	0.035336	0.95878	2	-4.3444
hsa-mir-128-2	0.061562	0.10801	0.978376	2	-4.2991
FASN	0.065763	0.11514	0.978376	2	-4.2764
BRINP3	0.073537	0.1278	0.978376	2	-4.2743
CHPF	0.1202	0.20136	0.978376	2	-4.257
UGT1A9	0.064113	0.11238	0.978376	2	-4.1975
UGT1A8	0.064113	0.11238	0.978376	2	-4.1975
UGT1A7	0.064113	0.11238	0.978376	2	-4.1975
UGT1A6	0.064113	0.11238	0.978376	2	-4.1975
UGT1A5	0.064113	0.11238	0.978376	2	-4.1975
UGT1A4	0.064113	0.11238	0.978376	2	-4.1975
UGT1A3	0.064113	0.11238	0.978376	2	-4.1975
UGT1A10	0.064113	0.11238	0.978376	2	-4.1975
FARP2	0.09657	0.16488	0.978376	2	-4.1926
hsa-mir-146b	0.20345	0.322	0.978376	2	-4.1787
TBC1D4	0.14033	0.28419	0.978376	2	-4.1676
GOLGA6A	0.081903	0.14129	0.978376	2	-4.1631
ZNF76	0.060973	0.10708	0.978376	2	-4.124
ASPSCR1	0.10169	0.17302	0.978376	2	-4.0771
DET1	0.063323	0.111	0.978376	2	-4.056
TAF4B	0.055024	0.097298	0.978376	2	-4.0405
CDH15	0.069265	0.12079	0.978376	2	-4.0299
HADHB	0.15096	0.2475	0.978376	2	-4.0127
MTMR1	0.1018	0.17319	0.978376	2	-3.9811
FAN1	0.12408	0.20727	0.978376	2	-3.9723
RPL26	0.10805	0.18262	0.978376	2	-3.9619
SYNE3	0.061693	0.10823	0.978376	2	-3.9291
ZDHHC13	0.086965	0.14946	0.978376	2	-3.886
MIEN1	0.085951	0.14784	0.978376	2	-3.8699
NALCN	0.058008	0.10226	0.978376	2	-3.8642
RAPGEF3	0.15928	0.25977	0.978376	2	-3.8605
BTF3	0.23337	0.36254	0.978376	2	-3.7943
CKS1B	0.087214	0.14988	0.978376	2	-3.7647
GAB2	0.1092	0.18446	0.978376	2	-3.7389
PTPLA	0.073537	0.1278	0.978376	2	-3.7367
CXorf36	0.13299	0.2208	0.978376	2	-3.7359
SPAG11B	0.15047	0.24681	0.978376	2	-3.685
SSX5	0.23337	0.36254	0.978376	2	-3.682
ACAT1	0.098291	0.16763	0.978376	2	-3.6751
PRR18	0.088981	0.15275	0.978376	2	-3.6546
NAA25	0.095996	0.16394	0.978376	2	-3.652
OR1J1	0.077339	0.13392	0.978376	2	-3.646
RSG1	0.054745	0.096848	0.978376	2	-3.6458
CEACAM16	0.076104	0.13189	0.978376	2	-3.5774
NUP50	0.071015	0.12362	0.978376	2	-3.5773
CREG2	0.092025	0.15759	0.978376	2	-3.5743
ZNF280D	0.23337	0.36254	0.978376	2	-3.5716
SULT1E1	0.17302	0.27953	0.978376	2	-3.5704
SHD	0.19123	0.30518	0.978376	2	-3.5506
RAB30	0.15928	0.25977	0.978376	2	-3.5303
TSGA10	0.20207	0.32006	0.978376	2	-3.528
DARS	0.1289	0.21467	0.978376	2	-3.5261
DDR1	0.11478	0.19297	0.978376	2	-3.5253
ZNF319	0.16508	0.26834	0.978376	2	-3.5246
MAP3K7	0.076831	0.13309	0.978376	2	-3.4949
RBBP6	0.071544	0.12453	0.978376	2	-3.4929
ASB5	0.18282	0.29322	0.978376	2	-3.4426
IL21R	0.052806	0.093522	0.978376	2	-3.4289
CKLF-CMTM1	0.14608	0.24027	0.978376	2	-3.4128
RSAD1	0.13633	0.22577	0.978376	2	-3.3348
ZBTB40	0.21052	0.33172	0.978376	2	-3.3085
CORO2B	0.068294	0.11921	0.978376	2	-3.3025
ZNF282	0.04817	0.085711	0.978376	2	-3.2864
DAZ4	0.18411	0.33115	0.978376	2	-3.2457
DAZ3	0.18411	0.33115	0.978376	2	-3.2457
DAZ2	0.18411	0.33115	0.978376	2	-3.2457
DAZ1	0.18411	0.33115	0.978376	2	-3.2457
ZNF518B	0.04985	0.08858	0.978376	2	-3.1628
hsa-mir-6738	0.078937	0.1365	0.978376	2	-3.1172
TNS1	0.12911	0.21499	0.978376	2	-3.0911
SPANXE	0.16816	0.27262	0.978376	2	-3.0817
RAB20	0.15421	0.25228	0.978376	2	-3.0399
PLSCR2	0.12246	0.20479	0.978376	2	-3.0233
ADARB1	0.10169	0.17302	0.978376	2	-3.0129
hsa-mir-8077	0.17969	0.28886	0.978376	2	-2.9866
FBXO42	0.089992	0.15436	0.978376	2	-2.9685
hsa-mir-573	0.10169	0.17302	0.978376	2	-2.927
PCNX	0.25	0.38431	0.978376	2	-2.8785
SYT13	0.083112	0.14319	0.978376	2	-2.8571
PIGF	0.1285	0.21402	0.978376	2	-2.8489
GGNBP2	0.10169	0.17302	0.978376	2	-2.8327
TMEM185B	0.077937	0.13484	0.978376	2	-2.8316
ITGB3	0.17772	0.28603	0.978376	2	-2.754
IGSF11	0.11219	0.18897	0.978376	2	-2.7492
PIGQ	0.16951	0.27453	0.978376	2	-2.7269
CNTROB	0.24671	0.38001	0.978376	2	-2.7015
RCL1	0.074652	0.12962	0.978376	2	-2.6933
C4orf22	0.1213	0.20301	0.978376	2	-2.5721
GPAA1	0.11513	0.19352	0.978376	2	-2.5006
BLOC1S6	0.091066	0.15607	0.978376	2	-2.5
MLXIPL	0.12246	0.20479	0.978376	2	-2.4005
FUT6	0.17805	0.28649	0.978376	2	-2.3935
BNIP2	0.091066	0.15607	0.978376	2	-2.3777
CRYBB3	0.15928	0.25977	0.978376	2	-2.376
hsa-mir-17	0.15928	0.25977	0.978376	2	-2.3752
C1orf105	0.080954	0.13976	0.978376	2	-2.3687
ZNF259	0.22698	0.37647	0.978376	2	-2.3471
STK3	0.15358	0.2514	0.978376	2	-2.3237
C3orf80	0.17285	0.27931	0.978376	2	-2.2695
GAGE2A	0.13165	0.27469	0.978376	2	-2.2677
ALPP	0.14268	0.28681	0.978376	2	-2.2131
OR7A17	0.20088	0.31835	0.978376	2	-2.1663
2024-09-12	0.17555	0.28298	0.978376	2	-2.1507
TMEM92	0.14061	0.23226	0.978376	2	-2.1294
NEU4	0.15928	0.25977	0.978376	2	-2.1022
CSF3	0.13299	0.2208	0.978376	2	-2.0815
KRTAP7-1	0.15928	0.25977	0.978376	2	-2.0493
OR2C1	0.13883	0.22959	0.978376	2	-2.0447
ZCCHC18	0.22028	0.34484	0.978376	2	-1.9698
GPR20	0.16471	0.26775	0.978376	2	-1.955
MITD1	0.1075	0.18178	0.978376	2	-1.899
AADACL2	0.122	0.20407	0.978376	2	-1.8337
KNCN	0.12831	0.21373	0.978376	2	-1.8234
MBD3L3	0.35071	0.50483	0.995746	2	-1.7758
MBD3L5	0.15928	0.25977	0.978376	2	-1.7758
MBD3L4	0.15928	0.25977	0.978376	2	-1.7758
EXOC2	0.14375	0.23683	0.978376	2	-1.7406
ZNF808	0.19123	0.30518	0.978376	2	-1.6621
MAPRE1	0.23337	0.36254	0.978376	2	-1.6497
NPIPL3	0.25017	0.40083	0.978376	2	-1.637
NPIPB5	0.25017	0.40083	0.978376	2	-1.637
LOC100132247	0.25017	0.40083	0.978376	2	-1.637
SLC16A3	0.20883	0.3294	0.978376	2	-1.6275
CHMP4A	0.19123	0.30518	0.978376	2	-1.5817
hsa-mir-134	0.13726	0.22723	0.978376	2	-1.5731
UEVLD	0.19993	0.31711	0.978376	2	-1.5662
RASGEF1C	0.19911	0.31595	0.978376	2	-1.5213
TRIM32	0.20589	0.3254	0.978376	2	-1.5212
hsa-mir-4639	0.1202	0.20136	0.978376	2	-1.4978
TSPAN9	0.23337	0.36254	0.978376	2	-1.468
OR4C12	0.15928	0.25977	0.978376	2	-1.4259
TES	0.13785	0.22808	0.978376	2	-1.4063
FTMT	0.2065	0.35493	0.978376	2	-1.3875
hsa-mir-3972	0.1008	0.17159	0.978376	2	-1.3875
ZNF143	0.23337	0.36254	0.978376	2	-1.3654
DNAJC14	0.1667	0.27054	0.978376	2	-1.2629
hsa-mir-7161	0.19934	0.31628	0.978376	2	-1.2582
ECT2	0.2348	0.38492	0.978376	2	-1.193
TJP1	0.24527	0.37819	0.978376	2	-1.1348
hsa-mir-520b	0.15265	0.25005	0.978376	2	-1.1323
DDX23	0.38845	0.54269	0.996114	2	-1.1135
PHOX2A	0.20601	0.32557	0.978376	2	-1.1108
SPTA1	0.16541	0.26875	0.978376	2	-1.0519
PIGU	0.20308	0.32149	0.978376	2	-1.0194
hsa-mir-6884	0.00033038	0.00032595	0.711221	1	-10.716
PSG8	0.00085899	0.00087651	0.833722	1	-10.343
LYAR	0.00099115	0.00098239	0.833722	1	-10.247
NOP14	0.0012555	0.0012289	0.833722	1	-10.221
PLA2G6	0.0019162	0.0019232	0.833722	1	-10.175
CHRM3	0.0020484	0.0020684	0.833722	1	-10.164
OR4X2	0.0021805	0.0022196	0.833722	1	-10.15
MED28	0.0032377	0.0032118	0.833722	1	-9.9893
ST6GAL1	0.003502	0.0034644	0.833722	1	-9.9731
ZMYND10	0.004295	0.0042389	0.833722	1	-9.8158
hsa-mir-1915	0.0044271	0.0043357	0.833722	1	-9.8138
UAP1L1	0.0049557	0.0048787	0.833722	1	-9.7007
TDG	0.0050879	0.0050133	0.833722	1	-9.6617
PCDHGC5	0.0065416	0.0064955	0.833722	1	-9.6588
PCDHGC4	0.0065416	0.0064955	0.833722	1	-9.6588
PCDHGC3	0.0065416	0.0064955	0.833722	1	-9.6588
PCDHGB7	0.0065416	0.0064955	0.833722	1	-9.6588
PCDHGB6	0.0065416	0.0064955	0.833722	1	-9.6588
PCDHGB5	0.0065416	0.0064955	0.833722	1	-9.6588
PCDHGB4	0.0065416	0.0064955	0.833722	1	-9.6588
PCDHGB3	0.0065416	0.0064955	0.833722	1	-9.6588
PCDHGB2	0.0065416	0.0064955	0.833722	1	-9.6588
PCDHGB1	0.0065416	0.0064955	0.833722	1	-9.6588
PCDHGA9	0.0065416	0.0064955	0.833722	1	-9.6588
PCDHGA8	0.0065416	0.0064955	0.833722	1	-9.6588
PCDHGA7	0.0065416	0.0064955	0.833722	1	-9.6588
PCDHGA6	0.0065416	0.0064955	0.833722	1	-9.6588
PCDHGA5	0.0065416	0.0064955	0.833722	1	-9.6588
PCDHGA2	0.0065416	0.0064955	0.833722	1	-9.6588
PCDHGA12	0.0065416	0.0064955	0.833722	1	-9.6588
PCDHGA10	0.0065416	0.0064955	0.833722	1	-9.6588
PCDHGA1	0.0065416	0.0064955	0.833722	1	-9.6588
ITPR3	0.0087882	0.0085995	0.915794	1	-9.5595
hsa-mir-7515	0.0089203	0.0087401	0.915794	1	-9.5564
CANT1	0.0093168	0.0091349	0.915794	1	-9.522
TNFRSF12A	0.01011	0.0099743	0.915794	1	-9.3673
LIMCH1	0.010242	0.010101	0.915794	1	-9.3396
hsa-mir-181c	0.010506	0.010351	0.915794	1	-9.3124
hsa-mir-637	0.011828	0.01165	0.915794	1	-9.2177
C2orf68	0.012753	0.01258	0.915794	1	-9.1577
CYB561D1	0.013281	0.013139	0.915794	1	-9.1319
ENPP3	0.013414	0.013247	0.915794	1	-9.1205
COMMD2	0.01381	0.013617	0.915794	1	-9.0951
KLHL40	0.013942	0.013762	0.915794	1	-9.094
MIF4GD	0.014603	0.01442	0.915794	1	-9.0419
LOC100130370	0.014735	0.01455	0.915794	1	-9.0386
CHTF8	0.017378	0.017313	0.926599	1	-8.9682
ASB18	0.01751	0.017446	0.926599	1	-8.967
AGPHD1	0.017775	0.017717	0.926599	1	-8.9623
CCDC120	0.018039	0.017959	0.926599	1	-8.9435
OR9Q2	0.00019823	0.00019738	0.711221	1	-8.9129
TNNI3	0.019757	0.019786	0.926599	1	-8.8531
TTC1	0.020021	0.020054	0.926599	1	-8.8468
LAMTOR3	0.023457	0.02343	0.947033	1	-8.8213
CD1D	0.023854	0.023805	0.947033	1	-8.807
METTL6	0.024514	0.024434	0.947033	1	-8.7939
TRPM2	0.024779	0.024729	0.947033	1	-8.7926
RNF168	0.024911	0.024889	0.947033	1	-8.7887
ABCA1	0.025175	0.025178	0.947223	1	-8.7768
CBX1	0.025439	0.025469	0.948542	1	-8.7714
COPS3	0.025836	0.025824	0.948542	1	-8.7674
GUF1	0.025968	0.025954	0.948542	1	-8.7607
DES	0.0261	0.026083	0.948542	1	-8.7499
DDX3Y	0.029008	0.028997	0.957043	1	-8.6735
ADSSL1	0.031783	0.031858	0.957043	1	-8.6226
ASIC2	0.031915	0.032	0.957043	1	-8.6182
RGS16	0.032311	0.032411	0.95878	1	-8.6122
MALL	0.033236	0.033326	0.95878	1	-8.5607
TNRC6B	0.034161	0.034267	0.95878	1	-8.5467
hsa-mir-6866	0.03469	0.034815	0.95878	1	-8.5326
INPPL1	0.036012	0.03612	0.958962	1	-8.5104
MUC22	0.037994	0.038144	0.964047	1	-8.4764
HMGCS2	0.038523	0.038671	0.968923	1	-8.46
hsa-mir-4705	0.042091	0.042162	0.973737	1	-8.4008
MCOLN2	0.042487	0.042586	0.973737	1	-8.3956
ATF7IP	0.00059469	0.0006224	0.833722	1	-8.3851
PLA2G4E	0.043676	0.043758	0.973737	1	-8.3606
FAM50A	0.046055	0.046148	0.978376	1	-8.3283
C9orf173	0.04632	0.046408	0.978376	1	-8.3247
NEDD9	0.048698	0.048846	0.978376	1	-8.2972
MST1	0.049756	0.049961	0.978376	1	-8.2804
AEN	0.050152	0.050342	0.978376	1	-8.271
P4HTM	0.051077	0.051183	0.978376	1	-8.2558
PRELID2	0.051474	0.051572	0.978376	1	-8.2462
GNG11	0.0011233	0.0011049	0.833722	1	-8.2161
NFE2L2	0.05339	0.053467	0.978376	1	-8.2152
CA8	0.053852	0.053922	0.978376	1	-8.2112
CPN1	0.054381	0.054391	0.978376	1	-8.2073
NACC2	0.055306	0.055282	0.978376	1	-8.1875
CTAGE6	0.0015858	0.0015496	0.833722	1	-8.1755
CTAGE15	0.0015858	0.0015496	0.833722	1	-8.1755
SERTAD1	0.057024	0.057029	0.978376	1	-8.153
TP53I3	0.0023127	0.0023512	0.833722	1	-8.1412
LRRC14B	0.059006	0.058968	0.978376	1	-8.1157
hsa-mir-183	0.061253	0.061201	0.978376	1	-8.0838
ENPP6	0.002577	0.0026008	0.833722	1	-8.0665
TAOK1	0.063235	0.063076	0.978376	1	-8.0622
CAND2	0.064821	0.064707	0.978376	1	-8.0358
DZIP1L	0.067662	0.06753	0.978376	1	-7.9791
NFAT5	0.06786	0.067741	0.978376	1	-7.9768
NUS1	0.070504	0.070353	0.978376	1	-7.9393
PCBP3	0.071561	0.07138	0.978376	1	-7.9226
RAB26	0.0037664	0.003708	0.833722	1	-7.9208
PRRC2A	0.0038985	0.003835	0.833722	1	-7.8732
CIB3	0.0041628	0.0040967	0.833722	1	-7.8626
LYZL1	0.07579	0.075526	0.978376	1	-7.8537
MS4A12	0.07645	0.076227	0.978376	1	-7.8334
THUMPD1	0.076847	0.076648	0.978376	1	-7.8283
C2orf82	0.0045593	0.0044491	0.833722	1	-7.8226
CMPK1	0.079093	0.078964	0.978376	1	-7.8076
EFCAB2	0.0046914	0.0046019	0.833722	1	-7.7954
LMAN2L	0.079886	0.07978	0.978376	1	-7.7893
CNIH2	0.080811	0.080649	0.978376	1	-7.7734
CBR4	0.081208	0.081019	0.978376	1	-7.7681
VCY1B	0.085635	0.085328	0.978376	1	-7.6912
VCY	0.085635	0.085328	0.978376	1	-7.6912
VCX2	0.085635	0.085328	0.978376	1	-7.6912
VCX	0.085635	0.085328	0.978376	1	-7.6912
POGK	0.0079952	0.0078553	0.915794	1	-7.6763
KYNU	0.0083917	0.0082274	0.915794	1	-7.6689
SERPINI1	0.089005	0.088666	0.978376	1	-7.6482
APH1A	0.008656	0.0084694	0.915794	1	-7.6437
CPNE5	0.089798	0.089444	0.978376	1	-7.6395
ACSF2	0.089798	0.089444	0.978376	1	-7.6395
PSMB4	0.0091846	0.0089942	0.915794	1	-7.6103
NT5M	0.094555	0.09426	0.978376	1	-7.5706
CNBP	0.095216	0.0949	0.978376	1	-7.5645
EZH2	0.095613	0.095297	0.978376	1	-7.5583
CLDN9	0.096273	0.095939	0.978376	1	-7.5521
C1orf74	0.096934	0.096572	0.978376	1	-7.5459
XKRY2	0.097397	0.097052	0.978376	1	-7.5365
XKRY	0.097397	0.097052	0.978376	1	-7.5365
TPD52L3	0.099709	0.099351	0.978376	1	-7.5047
KIAA1377	0.010374	0.010224	0.915794	1	-7.4721
AASDHPPT	0.01077	0.01059	0.915794	1	-7.4472
MAP1LC3C	0.10513	0.10464	0.978376	1	-7.4391
BMP2K	0.0099775	0.0098503	0.915794	1	-7.4083
ETHE1	0.10969	0.10923	0.978376	1	-7.3738
ALDH3A1	0.010638	0.010493	0.915794	1	-7.371
KIAA0020	0.01196	0.011764	0.915794	1	-7.3566
POLM	0.11081	0.11037	0.978376	1	-7.3561
NPPC	0.1116	0.11115	0.978376	1	-7.3454
FAM3D	0.012224	0.012045	0.915794	1	-7.3438
ZCCHC5	0.11226	0.11181	0.978376	1	-7.3382
STK19	0.011035	0.010856	0.915794	1	-7.3373
MYO1G	0.11596	0.11544	0.978376	1	-7.2831
TSR2	0.11682	0.11625	0.978376	1	-7.2681
TFDP1	0.11682	0.11625	0.978376	1	-7.2681
CDKL5	0.1194	0.11887	0.978376	1	-7.2567
TMEM217	0.12132	0.12072	0.978376	1	-7.2298
RHBDF2	0.12132	0.12072	0.978376	1	-7.2298
CCND1	0.016453	0.01633	0.926599	1	-7.2105
PREX2	0.016717	0.016632	0.926599	1	-7.2094
OR10C1	0.014471	0.014265	0.915794	1	-7.2038
FAM180B	0.017642	0.017575	0.926599	1	-7.1627
PCDHB10	0.12733	0.12687	0.978376	1	-7.1581
ZFAND2B	0.12984	0.12934	0.978376	1	-7.1293
DHRS3	0.016585	0.01649	0.926599	1	-7.1147
MLH3	0.13129	0.13084	0.978376	1	-7.0998
CNTNAP5	0.016982	0.016909	0.926599	1	-7.0913
FAM228B	0.019493	0.0195	0.926599	1	-7.0899
FAM120C	0.13314	0.13266	0.978376	1	-7.0741
KRTAP10-3	0.13486	0.13436	0.978376	1	-7.0567
FGF4	0.023589	0.023558	0.947033	1	-7.0414
AHCYL2	0.017907	0.017826	0.926599	1	-7.0367
TPD52L2	0.13579	0.13536	0.978376	1	-7.0346
OPRM1	0.012356	0.012181	0.915794	1	-7.0275
CLU	0.024646	0.024552	0.947033	1	-7.0247
HIPK1	0.017246	0.017179	0.926599	1	-7.0226
hsa-mir-4803	0.13817	0.13772	0.978376	1	-7.0122
SERPINA9	0.018303	0.01821	0.926599	1	-7.0108
HELLS	0.018435	0.018358	0.926599	1	-7.0091
hsa-mir-302f	0.018964	0.018983	0.926599	1	-7.0002
2024-09-07	0.13988	0.1395	0.978376	1	-6.9894
MRGPRX1	0.14015	0.13976	0.978376	1	-6.9849
C11orf48	0.0098454	0.0097354	0.915794	1	-6.984
MSMB	0.019889	0.019919	0.926599	1	-6.9827
NDUFV3	0.14253	0.14219	0.978376	1	-6.9617
PEX11A	0.14345	0.14313	0.978376	1	-6.9523
PNMA2	0.02729	0.027293	0.955393	1	-6.9496
hsa-mir-920	0.020153	0.020188	0.926599	1	-6.9438
GAREML	0.14424	0.14396	0.978376	1	-6.9428
ATP5S	0.02055	0.020541	0.926599	1	-6.9321
PPCDC	0.14583	0.14552	0.978376	1	-6.9237
CTDNEP1	0.028479	0.028489	0.957043	1	-6.9169
SLC25A23	0.02914	0.029162	0.957043	1	-6.9146
HIST2H2AC	0.030329	0.030337	0.957043	1	-6.9058
MYH7	0.018832	0.018809	0.926599	1	-6.8992
hsa-mir-3120	0.030792	0.03084	0.957043	1	-6.8985
hsa-mir-214	0.030792	0.03084	0.957043	1	-6.8985
DAB2	0.14768	0.14739	0.978376	1	-6.8946
hsa-mir-3529	0.14801	0.14772	0.978376	1	-6.8749
ZSCAN23	0.14847	0.14815	0.978376	1	-6.8649
SLC9A9	0.019228	0.019246	0.926599	1	-6.8639
OR2A5	0.032576	0.032689	0.95878	1	-6.8597
EEF1A2	0.026364	0.02639	0.948737	1	-6.8469
ACSBG2	0.031651	0.031732	0.957043	1	-6.8414
CCNB1IP1	0.14966	0.14936	0.978376	1	-6.8397
CCDC80	0.033501	0.033603	0.95878	1	-6.8343
IFNA13	0.02947	0.029462	0.957043	1	-6.8327
IFNA1	0.02947	0.029462	0.957043	1	-6.8327
ALYREF	0.15006	0.14976	0.978376	1	-6.8295
DCDC1	0.011299	0.01108	0.915794	1	-6.8161
SCIN	0.033897	0.033998	0.95878	1	-6.8159
CDKN3	0.15085	0.15057	0.978376	1	-6.814
SIPA1L3	0.15151	0.15123	0.978376	1	-6.8036
IL32	0.1525	0.15219	0.978376	1	-6.7932
C2orf88	0.1525	0.15219	0.978376	1	-6.7932
NFKBID	0.028743	0.028716	0.957043	1	-6.7892
USP17L5	0.02207	0.022082	0.926599	1	-6.7889
USP17L4	0.02207	0.022082	0.926599	1	-6.7889
USP17L30	0.02207	0.022082	0.926599	1	-6.7889
USP17L3	0.02207	0.022082	0.926599	1	-6.7889
USP17L29	0.02207	0.022082	0.926599	1	-6.7889
USP17L28	0.02207	0.022082	0.926599	1	-6.7889
USP17L27	0.02207	0.022082	0.926599	1	-6.7889
USP17L26	0.02207	0.022082	0.926599	1	-6.7889
USP17L25	0.02207	0.022082	0.926599	1	-6.7889
USP17L24	0.02207	0.022082	0.926599	1	-6.7889
USP17L22	0.02207	0.022082	0.926599	1	-6.7889
USP17L21	0.02207	0.022082	0.926599	1	-6.7889
USP17L20	0.02207	0.022082	0.926599	1	-6.7889
USP17L19	0.02207	0.022082	0.926599	1	-6.7889
USP17L18	0.02207	0.022082	0.926599	1	-6.7889
USP17L17	0.02207	0.022082	0.926599	1	-6.7889
USP17L13	0.02207	0.022082	0.926599	1	-6.7889
USP17L12	0.02207	0.022082	0.926599	1	-6.7889
USP17L11	0.02207	0.022082	0.926599	1	-6.7889
CNDP2	0.028875	0.028836	0.957043	1	-6.7866
GPR32	0.15336	0.15302	0.978376	1	-6.7773
FN3KRP	0.014339	0.014141	0.915794	1	-6.7752
SDCCAG3	0.15442	0.1541	0.978376	1	-6.7613
GARS	0.15442	0.1541	0.978376	1	-6.7613
CALCOCO2	0.15442	0.1541	0.978376	1	-6.7613
DHODH	0.030593	0.030629	0.957043	1	-6.7611
ALS2	0.031122	0.031188	0.957043	1	-6.7577
LZTFL1	0.036408	0.036543	0.958962	1	-6.7534
FAM13A	0.033633	0.033732	0.95878	1	-6.7394
RNF169	0.15581	0.1554	0.978376	1	-6.7287
ERI3	0.15581	0.1554	0.978376	1	-6.7287
NOP10	0.1564	0.15599	0.978376	1	-6.7232
OR7G1	0.1566	0.15616	0.978376	1	-6.7176
hsa-mir-1178	0.1566	0.15616	0.978376	1	-6.7176
hsa-mir-4300	0.036144	0.036241	0.958962	1	-6.7079
hsa-mir-513c	0.037333	0.037475	0.960839	1	-6.7069
MYBPC1	0.043016	0.043129	0.973737	1	-6.6913
MOV10L1	0.042355	0.042441	0.973737	1	-6.6879
FAIM2	0.043412	0.04353	0.973737	1	-6.6825
hsa-mir-3189	0.15905	0.15865	0.978376	1	-6.6783
MORF4L1	0.033369	0.033453	0.95878	1	-6.6747
GLYATL1	0.044734	0.04482	0.978376	1	-6.6712
LRRC7	0.15971	0.15935	0.978376	1	-6.6612
WDHD1	0.034426	0.034535	0.95878	1	-6.6599
EIF4G2	0.16063	0.16026	0.978376	1	-6.6496
UNC5CL	0.044073	0.044126	0.975833	1	-6.6459
ERCC6	0.035285	0.035445	0.95878	1	-6.6407
CSB-PGBD3	0.035285	0.035445	0.95878	1	-6.6407
P2RX3	0.16103	0.16064	0.978376	1	-6.6379
PTGIR	0.014074	0.013871	0.915794	1	-6.6373
ZIM3	0.047641	0.047695	0.978376	1	-6.6312
hsa-mir-4522	0.04817	0.048264	0.978376	1	-6.6291
KSR2	0.03654	0.036708	0.958962	1	-6.627
AK8	0.036805	0.036917	0.958962	1	-6.6205
RGPD2	0.16268	0.16221	0.978376	1	-6.6143
RGPD1	0.16268	0.16221	0.978376	1	-6.6143
RANBP2	0.16268	0.16221	0.978376	1	-6.6143
CCT3	0.047377	0.047429	0.978376	1	-6.6111
PDZD2	0.033104	0.033205	0.95878	1	-6.6084
ALDH2	0.16314	0.16268	0.978376	1	-6.6084
VTN	0.049227	0.049419	0.978376	1	-6.5923
QRFPR	0.042751	0.042864	0.973737	1	-6.5904
SF3B2	0.049623	0.049823	0.978376	1	-6.5887
SRGAP3	0.026497	0.026523	0.948737	1	-6.5862
CASP8AP2	0.16433	0.16388	0.978376	1	-6.5782
KCTD14	0.031386	0.03144	0.957043	1	-6.5715
HEMK1	0.050813	0.050937	0.978376	1	-6.5684
DCAF11	0.040637	0.04068	0.973737	1	-6.5595
IGFN1	0.036276	0.036366	0.958962	1	-6.5563
KRAS	0.041033	0.04106	0.973737	1	-6.5527
OSBPL10	0.16512	0.16466	0.978376	1	-6.5474
PRR9	0.042223	0.042294	0.973737	1	-6.5319
C12orf76	0.16605	0.16563	0.978376	1	-6.5222
PTPN3	0.050681	0.05081	0.978376	1	-6.5213
GGPS1	0.056495	0.056501	0.978376	1	-6.5194
EXTL1	0.035615	0.035754	0.958962	1	-6.5156
CLCA4	0.16651	0.1661	0.978376	1	-6.5095
WDR81	0.026232	0.026231	0.948663	1	-6.505
ITGA2	0.16777	0.16736	0.978376	1	-6.4901
SESN1	0.056363	0.056376	0.978376	1	-6.4813
hsa-mir-328	0.059931	0.059906	0.978376	1	-6.4764
GTF2H4	0.055174	0.055173	0.978376	1	-6.4711
FLNA	0.16843	0.16807	0.978376	1	-6.4706
C3orf67	0.046187	0.046264	0.978376	1	-6.4614
BAMBI	0.027025	0.027052	0.952065	1	-6.461
PCBP4	0.046452	0.046555	0.978376	1	-6.4557
BEST2	0.059535	0.059511	0.978376	1	-6.4527
AQPEP	0.060063	0.060045	0.978376	1	-6.4494
ZDHHC9	0.063103	0.062944	0.978376	1	-6.444
ALMS1	0.048038	0.048128	0.978376	1	-6.4425
TNPO1	0.063367	0.063221	0.978376	1	-6.4406
EXOC8	0.17081	0.17036	0.978376	1	-6.4373
CLDN15	0.057949	0.057956	0.978376	1	-6.4327
ALS2CR12	0.17134	0.17089	0.978376	1	-6.4306
ANKRD13B	0.054909	0.054901	0.978376	1	-6.4205
FAM222A	0.031518	0.031599	0.957043	1	-6.4158
GPX7	0.053059	0.053151	0.978376	1	-6.4078
NME1	0.065614	0.065525	0.978376	1	-6.4067
KTI12	0.172	0.17156	0.978376	1	-6.4033
SRC	0.049491	0.049668	0.978376	1	-6.4024
hsa-mir-4441	0.056892	0.056879	0.978376	1	-6.3906
CHRND	0.064292	0.064162	0.978376	1	-6.3824
ANKRD55	0.17266	0.17227	0.978376	1	-6.3755
FANCL	0.052134	0.052213	0.978376	1	-6.3708
LDHB	0.047905	0.048008	0.978376	1	-6.3619
ASH1L	0.069975	0.06982	0.978376	1	-6.3572
RFPL1	0.02425	0.024219	0.947033	1	-6.3552
FGF21	0.071032	0.070897	0.978376	1	-6.3436
HMOX2	0.068257	0.068132	0.978376	1	-6.3419
RNF215	0.070239	0.070065	0.978376	1	-6.3406
HOXA1	0.17411	0.1737	0.978376	1	-6.3399
F2RL3	0.070371	0.070196	0.978376	1	-6.3395
BTBD11	0.037862	0.038003	0.964047	1	-6.3314
GPR156	0.069182	0.069034	0.978376	1	-6.3312
CRTAC1	0.056099	0.056099	0.978376	1	-6.3197
SSTR3	0.17596	0.17553	0.978376	1	-6.3182
IFITM2	0.072486	0.072304	0.978376	1	-6.3179
HOXA3	0.061649	0.061567	0.978376	1	-6.3155
FAM117B	0.17609	0.17567	0.978376	1	-6.3108
hsa-mir-564	0.06601	0.065965	0.978376	1	-6.3072
SDHAF1	0.0029734	0.0029577	0.833722	1	-6.3064
TMSB15B	0.061121	0.06107	0.978376	1	-6.3051
RET	0.013017	0.012859	0.915794	1	-6.2993
SOGA2	0.068918	0.068771	0.978376	1	-6.2986
G3BP2	0.038655	0.038796	0.968923	1	-6.2962
hsa-mir-5004	0.0048236	0.0047274	0.833722	1	-6.2957
KLF11	0.072089	0.071905	0.978376	1	-6.2927
UNCX	0.17669	0.17631	0.978376	1	-6.2886
NAA30	0.058213	0.058186	0.978376	1	-6.2885
MAP2K2	0.071693	0.07153	0.978376	1	-6.2882
PHLDB2	0.075525	0.075252	0.978376	1	-6.2834
GADD45B	0.075261	0.074986	0.978376	1	-6.2831
HTR2B	0.17689	0.17653	0.978376	1	-6.2812
ENAM	0.01936	0.019381	0.926599	1	-6.2783
PPP4R1	0.17728	0.17693	0.978376	1	-6.2737
CCDC170	0.013678	0.013491	0.915794	1	-6.2719
SPANXN2	0.038787	0.038929	0.968923	1	-6.2718
IL31	0.064028	0.063903	0.978376	1	-6.2677
SPPL2A	0.17775	0.17744	0.978376	1	-6.2661
NTM	0.17775	0.17744	0.978376	1	-6.2661
SORBS3	0.067332	0.06721	0.978376	1	-6.2649
HCRTR1	0.076979	0.07679	0.978376	1	-6.2596
EDA2R	0.077375	0.077202	0.978376	1	-6.2588
BEGAIN	0.059667	0.059653	0.978376	1	-6.2575
hsa-mir-576	0.078036	0.077932	0.978376	1	-6.255
DDX41	0.1786	0.17824	0.978376	1	-6.2509
LRRC48	0.073411	0.073181	0.978376	1	-6.2479
BIN2	0.078697	0.078602	0.978376	1	-6.2474
AKR1A1	0.053588	0.053674	0.978376	1	-6.2419
hsa-mir-5698	0.047112	0.04717	0.978376	1	-6.2368
BTK	0.026629	0.02668	0.949177	1	-6.2347
ZC3H13	0.061914	0.061771	0.978376	1	-6.2291
TSNAX	0.080415	0.080266	0.978376	1	-6.2217
RNF152	0.079622	0.079526	0.978376	1	-6.213
TIRAP	0.055438	0.055414	0.978376	1	-6.2121
FMR1	0.17966	0.17922	0.978376	1	-6.2121
hsa-mir-5094	0.063499	0.063371	0.978376	1	-6.2118
PPP2R5B	0.080547	0.080378	0.978376	1	-6.2089
RGS8	0.069314	0.069188	0.978376	1	-6.2077
STRADB	0.063896	0.063761	0.978376	1	-6.206
UBE3D	0.068125	0.068004	0.978376	1	-6.2054
PRB2	0.17993	0.17949	0.978376	1	-6.2042
PTGER4	0.043544	0.043637	0.973737	1	-6.1978
hsa-mir-3187	0.18019	0.17975	0.978376	1	-6.1963
TCTN2	0.070768	0.070634	0.978376	1	-6.196
COL6A1	0.024118	0.024076	0.947033	1	-6.1958
SHOX_Y	0.082067	0.081877	0.978376	1	-6.1852
SHOX_X	0.082067	0.081877	0.978376	1	-6.1852
ADCY10	0.04883	0.049007	0.978376	1	-6.1828
hsa-mir-6761	0.029668	0.02969	0.957043	1	-6.1714
ANG	0.039844	0.039898	0.973737	1	-6.1658
AHCYL1	0.084247	0.08402	0.978376	1	-6.1643
OR4C45	0.18191	0.1814	0.978376	1	-6.1641
CTU1	0.029272	0.02928	0.957043	1	-6.1636
HAUS6	0.084908	0.08464	0.978376	1	-6.157
HSF5	0.019096	0.019116	0.926599	1	-6.1563
MTOR	0.045262	0.045405	0.978376	1	-6.1525
BMX	0.017114	0.01705	0.926599	1	-6.1523
IRX1	0.083322	0.083106	0.978376	1	-6.152
CYTL1	0.070636	0.07048	0.978376	1	-6.148
GPR88	0.049359	0.049548	0.978376	1	-6.1451
HNRNPUL1	0.035087	0.035224	0.95878	1	-6.139
RNF32	0.045791	0.04588	0.978376	1	-6.1385
KRTAP9-4	0.067464	0.067332	0.978376	1	-6.1385
DPF3	0.084115	0.083884	0.978376	1	-6.1358
UGP2	0.087816	0.087446	0.978376	1	-6.1353
CYP4Z1	0.0027091	0.0026976	0.833722	1	-6.1293
PDPN	0.06231	0.062173	0.978376	1	-6.1253
POLA1	0.068653	0.068527	0.978376	1	-6.1242
BMP3	0.080944	0.080782	0.978376	1	-6.1241
hsa-mir-346	0.18297	0.18244	0.978376	1	-6.1229
FCGR2B	0.06905	0.068904	0.978376	1	-6.1191
TUBB1	0.056627	0.056595	0.978376	1	-6.1183
GSG1L	0.073279	0.073077	0.978376	1	-6.1147
ANXA9	0.062442	0.0623	0.978376	1	-6.1138
LRRC30	0.089534	0.089191	0.978376	1	-6.1009
MSRB1	0.045394	0.045532	0.978376	1	-6.0994
AP1G2	0.055702	0.055692	0.978376	1	-6.0994
TAPBPL	0.079226	0.079106	0.978376	1	-6.0984
PDCD1	0.0709	0.070779	0.978376	1	-6.0983
TKTL2	0.18389	0.18332	0.978376	1	-6.0976
ABCD4	0.055835	0.05582	0.978376	1	-6.0971
ATRX	0.091251	0.090967	0.978376	1	-6.097
hsa-mir-8074	0.081472	0.081316	0.978376	1	-6.0963
USP32	0.09178	0.091492	0.978376	1	-6.0947
DNAJC13	0.014206	0.014035	0.915794	1	-6.0937
ATP10D	0.052531	0.052611	0.978376	1	-6.0913
ACTR1B	0.036672	0.036822	0.958962	1	-6.0901
MBL2	0.18468	0.1841	0.978376	1	-6.089
COX11	0.072618	0.072449	0.978376	1	-6.088
hsa-mir-3121	0.092705	0.092392	0.978376	1	-6.0864
HSD17B14	0.090459	0.090161	0.978376	1	-6.0862
SENP6	0.050945	0.051064	0.978376	1	-6.0786
MRPS22	0.064424	0.064286	0.978376	1	-6.0723
IFT140	0.18521	0.18462	0.978376	1	-6.0718
KRT38	0.052663	0.052744	0.978376	1	-6.0711
OR5B2	0.093895	0.093575	0.978376	1	-6.0681
TMEM198	0.072221	0.072036	0.978376	1	-6.0666
NAGA	0.090194	0.089852	0.978376	1	-6.06
HTT	0.094423	0.094125	0.978376	1	-6.056
A2ML1	0.052399	0.052454	0.978376	1	-6.0523
SYT2	0.071296	0.071135	0.978376	1	-6.0516
MYO10	0.073147	0.072962	0.978376	1	-6.0505
hsa-mir-4714	0.088741	0.088367	0.978376	1	-6.0502
FTSJ3	0.041298	0.041335	0.973737	1	-6.0481
C1QTNF5	0.090855	0.090572	0.978376	1	-6.0467
CDS2	0.030461	0.030477	0.957043	1	-6.0446
hsa-mir-3167	0.096802	0.096456	0.978376	1	-6.0444
PIGV	0.096405	0.096072	0.978376	1	-6.0438
LRRC70	0.065217	0.065126	0.978376	1	-6.0422
KIFC3	0.0746	0.074375	0.978376	1	-6.0407
GLT1D1	0.097066	0.096707	0.978376	1	-6.0393
TACC1	0.18614	0.18556	0.978376	1	-6.0367
FOXJ3	0.090062	0.089709	0.978376	1	-6.0358
MRC2	0.083719	0.083482	0.978376	1	-6.0355
CLCA1	0.096538	0.096205	0.978376	1	-6.0337
BMP4	0.058478	0.058452	0.978376	1	-6.0337
DPH6	0.073609	0.07339	0.978376	1	-6.0335
ATPBD4	0.073609	0.07339	0.978376	1	-6.0335
PLXNB1	0.060328	0.060301	0.978376	1	-6.0296
LYN	0.18653	0.18597	0.978376	1	-6.0278
CD177	0.040241	0.040288	0.973737	1	-6.0234
TMEM30B	0.099049	0.098643	0.978376	1	-6.0191
WASF3	0.090591	0.090282	0.978376	1	-6.0163
TMEM17	0.033765	0.033863	0.95878	1	-6.0129
APOBEC4	0.052927	0.053034	0.978376	1	-6.0129
hsa-mir-7107	0.058742	0.058725	0.978376	1	-6.0128
RARA	0.060196	0.060169	0.978376	1	-6.0127
RAB9A	0.087419	0.087069	0.978376	1	-6.0115
hsa-mir-376a-1	0.18746	0.18692	0.978376	1	-6.0098
FOXD3	0.050284	0.050462	0.978376	1	-6.009
SCN7A	0.092837	0.09251	0.978376	1	-6.0089
TXN2	0.092309	0.092023	0.978376	1	-6.0088
POLR2C	0.099974	0.099629	0.978376	1	-6.0085
CPOX	0.080283	0.080146	0.978376	1	-6.0045
EIF2B5	0.076318	0.076087	0.978376	1	-6.0044
FOXN2	0.043809	0.043882	0.973737	1	-6.0026
IRG1	0.054645	0.054641	0.978376	1	-6.002
SLC25A35	0.043214	0.043312	0.973737	1	-6.0019
RANGRF	0.043214	0.043312	0.973737	1	-6.0019
hsa-mir-548x-2	0.18786	0.1873	0.978376	1	-6.0008
ATF2	0.093498	0.093186	0.978376	1	-5.9975
hsa-mir-4788	0.035879	0.035984	0.958962	1	-5.994
VPS52	0.07764	0.077513	0.978376	1	-5.9932
ENDOD1	0.10037	0.099997	0.978376	1	-5.993
SELM	0.081604	0.081417	0.978376	1	-5.9922
SAFB	0.077772	0.077657	0.978376	1	-5.9887
IL9R_Y	0.078301	0.078203	0.978376	1	-5.9876
IL9R_X	0.078301	0.078203	0.978376	1	-5.9876
ADIPOR2	0.086758	0.086399	0.978376	1	-5.9871
PPM1G	0.10143	0.10098	0.978376	1	-5.9794
AP3S2	0.077177	0.077005	0.978376	1	-5.9794
EPHB1	0.025043	0.025029	0.947033	1	-5.9777
2024-09-09	0.0085239	0.0083333	0.915794	1	-5.9763
CASZ1	0.032047	0.032134	0.957043	1	-5.9749
hsa-mir-4263	0.10182	0.10137	0.978376	1	-5.9746
RAB11FIP5	0.10077	0.10037	0.978376	1	-5.9703
DEFB128	0.10011	0.099719	0.978376	1	-5.9691
USP9X	0.095348	0.095027	0.978376	1	-5.9673
SUPT20HL2	0.029933	0.02995	0.957043	1	-5.9638
FAM228A	0.040901	0.040934	0.973737	1	-5.9606
LIMK2	0.093234	0.092923	0.978376	1	-5.9586
ANAPC2	0.038258	0.038387	0.96647	1	-5.9576
TOR1AIP2	0.012885	0.012712	0.915794	1	-5.9571
TBXA2R	0.1013	0.10086	0.978376	1	-5.957
ROPN1	0.10222	0.10177	0.978376	1	-5.9561
RHOXF1	0.18957	0.18909	0.978376	1	-5.9545
FKBP10	0.045659	0.045776	0.978376	1	-5.9544
ERN1	0.10566	0.10521	0.978376	1	-5.9542
OLFML2A	0.072948	0.072779	0.978376	1	-5.9539
ZIM2	0.069512	0.069391	0.978376	1	-5.952
PEG3	0.069512	0.069391	0.978376	1	-5.952
SS18L1	0.019625	0.019655	0.926599	1	-5.9516
hsa-mir-6165	0.066275	0.066246	0.978376	1	-5.9478
H2AFY2	0.10526	0.10478	0.978376	1	-5.9461
hsa-mir-217	0.10645	0.10596	0.978376	1	-5.9446
URM1	0.10235	0.1019	0.978376	1	-5.9406
OR4K17	0.10685	0.10636	0.978376	1	-5.9394
ZNF737	0.058081	0.05808	0.978376	1	-5.937
SULT2A1	0.057288	0.057297	0.978376	1	-5.9368
NEUROD1	0.083983	0.083743	0.978376	1	-5.9356
CLASRP	0.19076	0.19026	0.978376	1	-5.9356
ANO9	0.054249	0.054267	0.978376	1	-5.9345
GGCT	0.080019	0.079891	0.978376	1	-5.9341
HIST1H2BL	0.081869	0.081698	0.978376	1	-5.93
TRADD	0.10777	0.10731	0.978376	1	-5.9274
FBXL4	0.065878	0.065829	0.978376	1	-5.9261
GNAQ	0.10724	0.10675	0.978376	1	-5.9248
hsa-mir-4526	0.028347	0.028362	0.957043	1	-5.9239
RNF122	0.082794	0.082571	0.978376	1	-5.9159
LAMA2	0.059799	0.05978	0.978376	1	-5.9151
C1RL	0.10024	0.099867	0.978376	1	-5.9139
SEC23A	0.037597	0.037723	0.960839	1	-5.9101
hsa-mir-6796	0.030197	0.030209	0.957043	1	-5.9055
ZNF578	0.077904	0.077794	0.978376	1	-5.9051
RCBTB1	0.04513	0.045254	0.978376	1	-5.9027
ZBTB17	0.08504	0.084767	0.978376	1	-5.9026
ATP2B1	0.048963	0.049138	0.978376	1	-5.9019
HPGD	0.0298	0.029825	0.957043	1	-5.9014
C3orf18	0.0082595	0.0081049	0.915794	1	-5.8982
IL23A	0.10618	0.10571	0.978376	1	-5.8965
INPP5J	0.032444	0.032555	0.95878	1	-5.8955
hsa-mir-4436b-2	0.047245	0.047305	0.978376	1	-5.8954
GRASP	0.056231	0.056227	0.978376	1	-5.8954
CNST	0.072354	0.072174	0.978376	1	-5.8951
hsa-mir-5694	0.10632	0.10585	0.978376	1	-5.8949
USP29	0.11068	0.11022	0.978376	1	-5.8925
SLC35A5	0.087683	0.087345	0.978376	1	-5.8855
B4GALNT1	0.065085	0.06495	0.978376	1	-5.8844
TRAF4	0.018567	0.018503	0.926599	1	-5.88
HIBCH	0.0672	0.067096	0.978376	1	-5.8784
GP2	0.075657	0.075403	0.978376	1	-5.8777
TEX261	0.061781	0.061671	0.978376	1	-5.8752
AKNA	0.11266	0.11221	0.978376	1	-5.8742
COL16A1	0.11306	0.11261	0.978376	1	-5.8709
ADRA2A	0.039712	0.039782	0.973737	1	-5.8708
B4GALT1	0.048302	0.048408	0.978376	1	-5.8686
hsa-mir-30c-2	0.039051	0.039178	0.971441	1	-5.8655
AGO3	0.09363	0.093322	0.978376	1	-5.8638
GJA5	0.08623	0.085893	0.978376	1	-5.8627
LSMD1	0.09667	0.096349	0.978376	1	-5.8616
JUNB	0.046848	0.046921	0.978376	1	-5.8609
AQP10	0.10658	0.10608	0.978376	1	-5.8585
INO80B	0.19314	0.19266	0.978376	1	-5.8573
ZNF580	0.082265	0.082064	0.978376	1	-5.8561
ZBTB3	0.062574	0.062423	0.978376	1	-5.8556
hsa-mir-188	0.11372	0.11323	0.978376	1	-5.853
TXNDC12	0.19347	0.19297	0.978376	1	-5.8472
DUSP28	0.19347	0.19297	0.978376	1	-5.8472
POPDC3	0.10922	0.1088	0.978376	1	-5.8468
KCNK7	0.11253	0.11207	0.978376	1	-5.842
SIGLEC1	0.0090525	0.0088717	0.915794	1	-5.8415
NSFL1C	0.058345	0.058315	0.978376	1	-5.8403
FAT4	0.112	0.11156	0.978376	1	-5.8389
PDE9A	0.086098	0.085765	0.978376	1	-5.838
USP1	0.11451	0.11398	0.978376	1	-5.8379
CDK5RAP1	0.19393	0.19338	0.978376	1	-5.837
CPA5	0.062839	0.062654	0.978376	1	-5.836
TNFRSF8	0.11319	0.11273	0.978376	1	-5.8351
ZNF747	0.099841	0.099475	0.978376	1	-5.8334
ARHGEF1	0.1157	0.11517	0.978376	1	-5.8304
SOCS2	0.05187	0.051967	0.978376	1	-5.8271
RFESD	0.10103	0.1006	0.978376	1	-5.8247
ZC3H7A	0.053984	0.054043	0.978376	1	-5.8246
GFER	0.065482	0.065396	0.978376	1	-5.8212
EME1	0.074468	0.074237	0.978376	1	-5.8196
TWISTNB	0.06416	0.064026	0.978376	1	-5.817
HEXIM1	0.03099	0.031045	0.957043	1	-5.8165
GCM2	0.19466	0.19404	0.978376	1	-5.8165
CHRM4	0.066539	0.066482	0.978376	1	-5.8155
hsa-mir-4425	0.11755	0.11703	0.978376	1	-5.814
CLRN1	0.099313	0.098917	0.978376	1	-5.8136
RBMXL1	0.083851	0.083627	0.978376	1	-5.8112
FOLR2	0.092441	0.092136	0.978376	1	-5.811
CARD6	0.11914	0.11859	0.978376	1	-5.8108
hsa-mir-764	0.011167	0.010965	0.915794	1	-5.8099
NRD1	0.11028	0.1098	0.978376	1	-5.8093
TRIM5	0.023721	0.023676	0.947033	1	-5.8074
AGPAT9	0.085172	0.084908	0.978376	1	-5.8069
MECP2	0.10936	0.10893	0.978376	1	-5.8063
MYH14	0.10156	0.10111	0.978376	1	-5.8049
FOXP2	0.11385	0.11336	0.978376	1	-5.8049
AFAP1	0.11953	0.11901	0.978376	1	-5.8048
CDKN1C	0.090723	0.090398	0.978376	1	-5.8042
hsa-mir-650	0.11557	0.11504	0.978376	1	-5.8037
FOXO1	0.1198	0.11932	0.978376	1	-5.8027
hsa-mir-342	0.10539	0.10495	0.978376	1	-5.8016
FARP1	0.037201	0.037342	0.960839	1	-5.8014
ANKRD37	0.037465	0.037598	0.960839	1	-5.8002
TDRD10	0.064953	0.06484	0.978376	1	-5.7954
SNX13	0.10883	0.10838	0.978376	1	-5.7946
SPTLC2	0.10579	0.10535	0.978376	1	-5.7885
hsa-mir-378h	0.1009	0.10049	0.978376	1	-5.7872
LINGO1	0.040108	0.040149	0.973737	1	-5.7867
CCNA2	0.10856	0.10814	0.978376	1	-5.7867
MAPRE2	0.063632	0.06351	0.978376	1	-5.7852
IL23R	0.11094	0.11049	0.978376	1	-5.7847
MCF2L2	0.11332	0.11286	0.978376	1	-5.7833
LRFN4	0.12165	0.12105	0.978376	1	-5.7821
BCL11B	0.11213	0.1117	0.978376	1	-5.7752
hsa-mir-5096	0.19526	0.19461	0.978376	1	-5.7745
TRAFD1	0.083587	0.083355	0.978376	1	-5.772
RNF126	0.10698	0.10648	0.978376	1	-5.772
hsa-mir-3941	0.11544	0.11489	0.978376	1	-5.7719
CCDC169-SOHLH2	0.11484	0.11433	0.978376	1	-5.7716
CCDC169	0.11484	0.11433	0.978376	1	-5.7716
DKK1	0.069843	0.06968	0.978376	1	-5.7704
TEFM	0.093762	0.093454	0.978376	1	-5.7673
FAHD2B	0.12033	0.11977	0.978376	1	-5.7663
ORC4	0.12336	0.12286	0.978376	1	-5.7659
UPK1A	0.058874	0.058827	0.978376	1	-5.764
WNT7B	0.12085	0.1203	0.978376	1	-5.7635
SEC16A	0.10169	0.10124	0.978376	1	-5.7611
FAM163B	0.11662	0.11607	0.978376	1	-5.7611
VMAC	0.10592	0.10548	0.978376	1	-5.7604
ETNK1	0.11359	0.1131	0.978376	1	-5.7598
TRPC3	0.097595	0.097215	0.978376	1	-5.7588
HORMAD2	0.070107	0.069946	0.978376	1	-5.754
FOXD4L6	0.12621	0.12573	0.978376	1	-5.751
FOXD4L3	0.12621	0.12573	0.978376	1	-5.751
BCMO1	0.10605	0.10559	0.978376	1	-5.749
SPEG	0.034822	0.03496	0.95878	1	-5.7489
TNKS2	0.12693	0.12651	0.978376	1	-5.7467
SOCS7	0.1272	0.12675	0.978376	1	-5.7459
hsa-mir-4687	0.076583	0.076367	0.978376	1	-5.7459
hsa-mir-1184-2	0.10837	0.1079	0.978376	1	-5.7444
hsa-mir-1184-1	0.10837	0.1079	0.978376	1	-5.7444
DZIP1	0.079754	0.079646	0.978376	1	-5.742
C9orf152	0.068521	0.068393	0.978376	1	-5.7402
ZNF83	0.091119	0.090834	0.978376	1	-5.7394
OR2B3	0.016849	0.016764	0.926599	1	-5.7393
ABCB6	0.083058	0.082854	0.978376	1	-5.7386
ZFYVE19	0.08689	0.08654	0.978376	1	-5.7385
RLIM	0.11702	0.11649	0.978376	1	-5.737
LPIN1	0.036937	0.037073	0.959202	1	-5.7356
NAA38	0.12323	0.12275	0.978376	1	-5.7342
SLC24A3	0.063764	0.063636	0.978376	1	-5.7337
FBXW5	0.025572	0.025561	0.948542	1	-5.7333
CXCL9	0.12865	0.12815	0.978376	1	-5.7329
ESPL1	0.055042	0.055042	0.978376	1	-5.7314
DEFB133	0.19605	0.19543	0.978376	1	-5.7313
CCDC36	0.12376	0.12326	0.978376	1	-5.7299
NMUR2	0.065746	0.065678	0.978376	1	-5.7295
TMEM51	0.12799	0.12749	0.978376	1	-5.7282
TFDP3	0.041166	0.041202	0.973737	1	-5.7279
MICU2	0.12892	0.12844	0.978376	1	-5.7241
LSM12	0.095084	0.094789	0.978376	1	-5.7234
ANKRD34C	0.12191	0.12135	0.978376	1	-5.7214
ZNF468	0.12429	0.12378	0.978376	1	-5.7211
AGA	0.19638	0.19575	0.978376	1	-5.7203
hsa-mir-4505	0.097859	0.097442	0.978376	1	-5.7192
TMEM8C	0.090326	0.089988	0.978376	1	-5.7186
PI15	0.025704	0.025691	0.948542	1	-5.7173
CA10	0.11649	0.11595	0.978376	1	-5.7162
CCDC140	0.12416	0.12366	0.978376	1	-5.7148
ZNF304	0.12257	0.12205	0.978376	1	-5.7124
TOMM20	0.074072	0.073836	0.978376	1	-5.7107
hsa-mir-6774	0.013149	0.012987	0.915794	1	-5.7082
hsa-mir-604	0.12667	0.12623	0.978376	1	-5.7075
SUSD5	0.097727	0.097309	0.978376	1	-5.7058
NAT8	0.054513	0.054509	0.978376	1	-5.7045
VN1R1	0.048566	0.04868	0.978376	1	-5.7039
hsa-mir-19b-2	0.1305	0.13002	0.978376	1	-5.701
ABCA4	0.12019	0.11966	0.978376	1	-5.6922
PDE6H	0.12046	0.1199	0.978376	1	-5.6905
TRPM7	0.13156	0.13111	0.978376	1	-5.6888
C8orf44	0.12099	0.12043	0.978376	1	-5.6884
hsa-mir-4492	0.05676	0.05672	0.978376	1	-5.6875
SURF1	0.19717	0.19654	0.978376	1	-5.6867
hsa-mir-6840	0.1161	0.11556	0.978376	1	-5.6846
RAPGEF4	0.047773	0.047854	0.978376	1	-5.6836
GCKR	0.092044	0.091752	0.978376	1	-5.6833
CXCR7	0.11629	0.11578	0.978376	1	-5.6818
ACKR3	0.11629	0.11578	0.978376	1	-5.6818
ELF1	0.048434	0.048527	0.978376	1	-5.6796
hsa-mir-3613	0.069711	0.069566	0.978376	1	-5.6759
MAGED4B	0.19796	0.19734	0.978376	1	-5.6754
MAGED4	0.19796	0.19734	0.978376	1	-5.6754
METTL7B	0.095877	0.095545	0.978376	1	-5.6697
CCDC90B	0.1079	0.10745	0.978376	1	-5.6695
MAOB	0.1153	0.11476	0.978376	1	-5.668
ERCC4	0.094027	0.093735	0.978376	1	-5.666
ZFP69B	0.19836	0.19769	0.978376	1	-5.6639
CYP4F22	0.19836	0.19769	0.978376	1	-5.6639
TMEM55A	0.13063	0.13015	0.978376	1	-5.6633
TP53I11	0.098123	0.097701	0.978376	1	-5.6622
ADARB2	0.11583	0.1153	0.978376	1	-5.6615
AICDA	0.12971	0.12924	0.978376	1	-5.6612
GYPC	0.087023	0.086668	0.978376	1	-5.659
CD320	0.11729	0.11677	0.978376	1	-5.6554
PDYN	0.1338	0.1333	0.978376	1	-5.6535
ASB15	0.086626	0.086275	0.978376	1	-5.6528
JMJD8	0.092177	0.091891	0.978376	1	-5.651
EMC8	0.11464	0.11412	0.978376	1	-5.6484
CUL4B	0.1231	0.12262	0.978376	1	-5.6482
KIAA1429	0.13592	0.13546	0.978376	1	-5.6446
hsa-mir-4649	0.12006	0.11955	0.978376	1	-5.6427
TBL1Y	0.077508	0.07736	0.978376	1	-5.6406
LOC440243	0.073873	0.073638	0.978376	1	-5.6405
GOLGA6L1	0.073873	0.073638	0.978376	1	-5.6405
SLAIN1	0.091912	0.091623	0.978376	1	-5.6378
ST8SIA1	0.098652	0.098256	0.978376	1	-5.6352
CSNK2A2	0.074997	0.074739	0.978376	1	-5.634
CDKN1B	0.084512	0.084256	0.978376	1	-5.6337
IQCC	0.19902	0.19833	0.978376	1	-5.629
hsa-mir-4674	0.19902	0.19833	0.978376	1	-5.629
TEAD3	0.13684	0.13635	0.978376	1	-5.6241
hsa-mir-6816	0.10063	0.10024	0.978376	1	-5.6227
STK32C	0.12654	0.12607	0.978376	1	-5.621
KIF2C	0.097198	0.096842	0.978376	1	-5.6208
FAM171A2	0.040505	0.040568	0.973737	1	-5.6208
ASPG	0.13737	0.13689	0.978376	1	-5.6204
REEP2	0.12112	0.12055	0.978376	1	-5.6181
PRMT3	0.1383	0.13785	0.978376	1	-5.6174
F13B	0.092969	0.092652	0.978376	1	-5.6162
DST	0.094952	0.094653	0.978376	1	-5.613
hsa-mir-891b	0.14002	0.13962	0.978376	1	-5.6091
TMED8	0.19955	0.19884	0.978376	1	-5.6052
MED21	0.084776	0.084503	0.978376	1	-5.6043
OR2L5	0.066803	0.066733	0.978376	1	-5.6034
USP3	0.12746	0.12698	0.978376	1	-5.603
BRD3	0.12759	0.1271	0.978376	1	-5.6025
hsa-mir-1225	0.13222	0.13177	0.978376	1	-5.6011
LRIT2	0.12244	0.12191	0.978376	1	-5.5993
SVOP	0.12944	0.12898	0.978376	1	-5.5991
CCNI2	0.10764	0.10716	0.978376	1	-5.5977
XYLB	0.092573	0.092263	0.978376	1	-5.5969
ATXN1L	0.039976	0.040013	0.973737	1	-5.5968
hsa-mir-4321	0.11411	0.11362	0.978376	1	-5.5957
LIPK	0.13024	0.12974	0.978376	1	-5.5921
HYOU1	0.098784	0.098397	0.978376	1	-5.5815
ERAP1	0.071825	0.071651	0.978376	1	-5.5801
DMKN	0.14107	0.14072	0.978376	1	-5.5795
P2RY1	0.14385	0.14352	0.978376	1	-5.5794
hsa-mir-6876	0.13764	0.13716	0.978376	1	-5.5793
ZNFX1	0.1005	0.10012	0.978376	1	-5.5789
CERCAM	0.14173	0.1414	0.978376	1	-5.5785
MMEL1	0.12931	0.12884	0.978376	1	-5.5783
SNAPC3	0.14398	0.14366	0.978376	1	-5.5782
EFCC1	0.13843	0.13802	0.978376	1	-5.5744
GZMB	0.057553	0.057554	0.978376	1	-5.5723
CLCN4	0.10989	0.10944	0.978376	1	-5.572
ACYP1	0.14041	0.14003	0.978376	1	-5.5712
OVGP1	0.19995	0.19923	0.978376	1	-5.5689
hsa-mir-4664	0.19995	0.19923	0.978376	1	-5.5689
DTD2	0.096141	0.095813	0.978376	1	-5.5688
PLCXD2	0.13909	0.13875	0.978376	1	-5.5684
ZNF687	0.14491	0.14461	0.978376	1	-5.5659
MFSD10	0.11398	0.11349	0.978376	1	-5.5655
FCF1	0.042619	0.042721	0.973737	1	-5.5648
MBD3L2	0.13883	0.13846	0.978376	1	-5.5616
APBB2	0.052795	0.052906	0.978376	1	-5.5612
MS4A15	0.13143	0.13097	0.978376	1	-5.5609
GUCY2C	0.14213	0.14179	0.978376	1	-5.5606
CTNNAL1	0.13328	0.13278	0.978376	1	-5.5593
hsa-mir-365a	0.14477	0.14448	0.978376	1	-5.5585
PSMD2	0.142	0.14167	0.978376	1	-5.5562
hsa-mir-6770-3	0.13275	0.1323	0.978376	1	-5.5559
hsa-mir-6770-2	0.13275	0.1323	0.978376	1	-5.5559
hsa-mir-6770-1	0.13275	0.1323	0.978376	1	-5.5559
SMIM1	0.13671	0.13623	0.978376	1	-5.5549
MYLK4	0.13711	0.13662	0.978376	1	-5.5509
RPL7L1	0.094159	0.093868	0.978376	1	-5.548
CCDC101	0.20054	0.19981	0.978376	1	-5.5441
NAV2	0.12403	0.12354	0.978376	1	-5.5434
GPR27	0.12284	0.12231	0.978376	1	-5.5424
MMGT1	0.11174	0.11127	0.978376	1	-5.5415
PLAC8	0.14755	0.14726	0.978376	1	-5.5378
hsa-mir-548ay	0.14358	0.14326	0.978376	1	-5.537
CNTF	0.13367	0.13316	0.978376	1	-5.5356
TLDC1	0.13341	0.13289	0.978376	1	-5.534
PTPRB	0.1268	0.12638	0.978376	1	-5.5323
NCK1	0.20094	0.20026	0.978376	1	-5.5315
VPS13C	0.11438	0.11385	0.978376	1	-5.5298
OR4D9	0.14411	0.1438	0.978376	1	-5.5272
hsa-mir-566	0.13539	0.13495	0.978376	1	-5.5262
BPIFA3	0.13473	0.13424	0.978376	1	-5.5257
hsa-mir-3656	0.12455	0.12402	0.978376	1	-5.5249
CSMD2	0.11292	0.11246	0.978376	1	-5.5245
NOXA1	0.051606	0.051711	0.978376	1	-5.5219
EPS8	0.14543	0.14512	0.978376	1	-5.5219
hsa-mir-4282	0.090987	0.090701	0.978376	1	-5.5127
PDGFD	0.14702	0.14671	0.978376	1	-5.5124
MCIDAS	0.093102	0.092785	0.978376	1	-5.5091
LCN2	0.149	0.14869	0.978376	1	-5.5061
C17orf59	0.10909	0.10865	0.978376	1	-5.5053
hsa-mir-1255a	0.14094	0.14057	0.978376	1	-5.5042
MCTP1	0.11504	0.11451	0.978376	1	-5.4993
UGT1A1	0.12535	0.12484	0.978376	1	-5.499
ACTB	0.13698	0.13649	0.978376	1	-5.499
PPM1E	0.089401	0.089069	0.978376	1	-5.4956
ZBED4	0.046716	0.046794	0.978376	1	-5.4951
UVSSA	0.13724	0.13676	0.978376	1	-5.4931
TK2	0.10116	0.10071	0.978376	1	-5.4906
FAM25G	0.14669	0.14637	0.978376	1	-5.4902
FAM25C	0.14669	0.14637	0.978376	1	-5.4902
KRTAP2-3	0.11107	0.1106	0.978376	1	-5.4899
IMMP2L	0.1375	0.13703	0.978376	1	-5.4897
BTN3A2	0.14887	0.14855	0.978376	1	-5.4871
CTDSPL	0.060592	0.060565	0.978376	1	-5.482
hsa-mir-4784	0.20285	0.20211	0.978376	1	-5.4802
COPB2	0.20285	0.20211	0.978376	1	-5.4802
F3	0.081736	0.081565	0.978376	1	-5.4799
SPATA21	0.14834	0.14804	0.978376	1	-5.4795
OXT	0.083454	0.08322	0.978376	1	-5.4789
TRPV5	0.13658	0.1361	0.978376	1	-5.478
GATSL2	0.13209	0.13164	0.978376	1	-5.476
METTL21A	0.12812	0.12764	0.978376	1	-5.4752
ZNF517	0.1494	0.14908	0.978376	1	-5.475
PRR19	0.12958	0.1291	0.978376	1	-5.4721
TRIM63	0.14372	0.1434	0.978376	1	-5.4703
COX16	0.089137	0.088778	0.978376	1	-5.4674
C8orf46	0.032972	0.033086	0.95878	1	-5.4674
EIF4E1B	0.15098	0.15072	0.978376	1	-5.4667
LRRC72	0.080679	0.08049	0.978376	1	-5.4644
hsa-mir-4661	0.15032	0.15003	0.978376	1	-5.4636
TSC22D1	0.1342	0.13368	0.978376	1	-5.463
OR4A16	0.12905	0.12857	0.978376	1	-5.4574
ZNF618	0.20345	0.20274	0.978376	1	-5.4539
CCDC33	0.15217	0.15187	0.978376	1	-5.452
FBXL18	0.15019	0.14988	0.978376	1	-5.4469
hsa-mir-1301	0.10209	0.10164	0.978376	1	-5.4441
FAM65B	0.13949	0.13913	0.978376	1	-5.443
DGKZ	0.20385	0.20313	0.978376	1	-5.4405
NMNAT1	0.12059	0.12005	0.978376	1	-5.438
RNF19B	0.14081	0.14044	0.978376	1	-5.4377
CYP2A7	0.13803	0.13756	0.978376	1	-5.4312
PPP1R14B	0.12442	0.1239	0.978376	1	-5.4301
ZBED1_Y	0.13625	0.13579	0.978376	1	-5.4273
ZBED1_X	0.13625	0.13579	0.978376	1	-5.4273
NDUFA6	0.12706	0.12663	0.978376	1	-5.4187
ZNF222	0.12997	0.12945	0.978376	1	-5.4184
C12orf54	0.14054	0.14017	0.978376	1	-5.4171
2024-12-01	0.15138	0.15109	0.978376	1	-5.4122
NLGN3	0.13526	0.1348	0.978376	1	-5.4071
PRSS37	0.1568	0.15639	0.978376	1	-5.4036
TAF1D	0.11015	0.1097	0.978376	1	-5.4032
VSNL1	0.15059	0.15033	0.978376	1	-5.4011
AP1M2	0.15508	0.15469	0.978376	1	-5.4009
C2orf61	0.2047	0.20397	0.978376	1	-5.3997
CPSF6	0.086494	0.086175	0.978376	1	-5.3995
KCNN3	0.14623	0.14591	0.978376	1	-5.3986
EXOSC2	0.14953	0.14922	0.978376	1	-5.388
POC1B-GALNT4	0.15805	0.15769	0.978376	1	-5.3799
GALNT4	0.15805	0.15769	0.978376	1	-5.3799
PLAGL2	0.15759	0.15722	0.978376	1	-5.3793
HIST1H3B	0.15125	0.15099	0.978376	1	-5.3793
KIAA0753	0.15786	0.15749	0.978376	1	-5.377
MRPS11	0.1346	0.13409	0.978376	1	-5.374
PPIL6	0.11121	0.11073	0.978376	1	-5.3728
SYBU	0.15376	0.15342	0.978376	1	-5.3694
ARHGAP10	0.14927	0.14895	0.978376	1	-5.3691
MAP2K7	0.12773	0.12723	0.978376	1	-5.3658
LDHD	0.12178	0.12119	0.978376	1	-5.3649
C6orf106	0.15468	0.15436	0.978376	1	-5.3627
PLA2G5	0.20556	0.20483	0.978376	1	-5.3576
hsa-mir-5787	0.15839	0.15803	0.978376	1	-5.3563
RPAP3	0.12839	0.12789	0.978376	1	-5.3547
SMIM20	0.15772	0.15735	0.978376	1	-5.3528
RBMS3	0.08438	0.084152	0.978376	1	-5.3527
SRGAP1	0.1609	0.16051	0.978376	1	-5.3518
SLC6A3	0.15165	0.15135	0.978376	1	-5.3497
hsa-mir-548ax	0.1457	0.14538	0.978376	1	-5.3489
PROX1	0.13605	0.13559	0.978376	1	-5.3446
FAM131B	0.15297	0.15264	0.978376	1	-5.3435
CDK15	0.15283	0.15251	0.978376	1	-5.3414
GPX5	0.1535	0.15317	0.978376	1	-5.3398
HSD17B6	0.15944	0.15907	0.978376	1	-5.3345
GABRD	0.16182	0.16136	0.978376	1	-5.3321
APTX	0.14438	0.14409	0.978376	1	-5.3318
CRYGB	0.13975	0.13938	0.978376	1	-5.3223
KCNK17	0.12363	0.12312	0.978376	1	-5.3209
PCSK9	0.12825	0.12779	0.978376	1	-5.3199
GPR152	0.042884	0.042997	0.973737	1	-5.3199
TAF9B	0.15389	0.15355	0.978376	1	-5.3154
MPEG1	0.14517	0.14486	0.978376	1	-5.3143
C2orf71	0.13116	0.13068	0.978376	1	-5.3103
UBE2D2	0.14292	0.14258	0.978376	1	-5.3085
ASCC3	0.13433	0.13383	0.978376	1	-5.3045
LHX4	0.16394	0.16349	0.978376	1	-5.3027
SOWAHB	0.15601	0.15558	0.978376	1	-5.3025
WWP1	0.15891	0.15853	0.978376	1	-5.3007
hsa-mir-5701-2	0.20748	0.20673	0.978376	1	-5.2996
hsa-mir-5701-1	0.20748	0.20673	0.978376	1	-5.2996
hsa-mir-3646	0.16446	0.16401	0.978376	1	-5.2943
KLC2	0.13248	0.13205	0.978376	1	-5.2939
UBE2D4	0.15363	0.15328	0.978376	1	-5.2902
C6	0.20774	0.20699	0.978376	1	-5.2847
EME2	0.16499	0.16455	0.978376	1	-5.2802
CCDC42	0.16156	0.16109	0.978376	1	-5.2799
PRKAR2B	0.1453	0.14499	0.978376	1	-5.2794
NUDT5	0.13407	0.13357	0.978376	1	-5.2774
HIST1H3D	0.16024	0.15986	0.978376	1	-5.2741
SLC17A6	0.14451	0.1442	0.978376	1	-5.2713
NDUFA5	0.13394	0.13344	0.978376	1	-5.2704
ZBP1	0.20854	0.2077	0.978376	1	-5.2697
STK4	0.20854	0.2077	0.978376	1	-5.2697
MYLPF	0.15997	0.15961	0.978376	1	-5.2635
TGM4	0.13552	0.13509	0.978376	1	-5.2551
ASNA1	0.16129	0.16085	0.978376	1	-5.2545
SDR42E1	0.16526	0.16479	0.978376	1	-5.2527
HYAL1	0.15865	0.15829	0.978376	1	-5.2452
CST9L	0.20926	0.20841	0.978376	1	-5.2392
hsa-mir-6808	0.1642	0.16375	0.978376	1	-5.2383
COL4A3BP	0.15918	0.15878	0.978376	1	-5.2382
S100A4	0.16684	0.16642	0.978376	1	-5.2366
LSAMP	0.15957	0.15922	0.978376	1	-5.2362
PGRMC1	0.16764	0.16722	0.978376	1	-5.2299
SLC25A3	0.20986	0.20902	0.978376	1	-5.2236
CHDC2	0.20986	0.20902	0.978376	1	-5.2236
OR1C1	0.14913	0.14882	0.978376	1	-5.223
PHF15	0.13869	0.1383	0.978376	1	-5.2229
MTAP	0.13077	0.13029	0.978376	1	-5.2229
ASB6	0.11055	0.11007	0.978376	1	-5.2229
NUPL1	0.16579	0.16536	0.978376	1	-5.2191
UQCRQ	0.13896	0.13858	0.978376	1	-5.219
AK1	0.11927	0.11872	0.978376	1	-5.2079
SPINK2	0.16618	0.16577	0.978376	1	-5.2057
FGF8	0.16209	0.16162	0.978376	1	-5.2041
MATN2	0.17015	0.16969	0.978376	1	-5.2025
CCDC177	0.15191	0.15162	0.978376	1	-5.1998
CDH3	0.14609	0.14578	0.978376	1	-5.1997
POU3F1	0.15402	0.15369	0.978376	1	-5.1984
LRP4	0.14068	0.14031	0.978376	1	-5.1979
SPATA31D4	0.1081	0.10763	0.978376	1	-5.1968
SPATA31D3	0.1081	0.10763	0.978376	1	-5.1968
SLC13A2	0.16142	0.16096	0.978376	1	-5.1916
KRTAP5-9	0.16869	0.16832	0.978376	1	-5.19
CCDC108	0.16565	0.16522	0.978376	1	-5.1871
EHBP1L1	0.16367	0.16323	0.978376	1	-5.1844
TDRD6	0.13182	0.13136	0.978376	1	-5.1777
BRMS1L	0.21045	0.2096	0.978376	1	-5.1761
hsa-mir-499a	0.14325	0.14294	0.978376	1	-5.1701
SCARF1	0.1605	0.16013	0.978376	1	-5.1666
GJA4	0.17213	0.1717	0.978376	1	-5.1661
NDNL2	0.17226	0.17185	0.978376	1	-5.164
SFRP2	0.15548	0.15509	0.978376	1	-5.1614
IGF2BP2	0.16671	0.16631	0.978376	1	-5.1614
UNC119B	0.17292	0.17253	0.978376	1	-5.1451
TERT	0.16486	0.16443	0.978376	1	-5.1434
NF1	0.0027733	0.0053793	0.833722	1	-5.1374
TMEM61	0.14649	0.14616	0.978376	1	-5.1355
ATF3	0.16222	0.16175	0.978376	1	-5.1352
SNAPC1	0.21131	0.21046	0.978376	1	-5.1269
KDM6B	0.21131	0.21046	0.978376	1	-5.1269
AGBL2	0.14028	0.1399	0.978376	1	-5.1243
OR6A2	0.17173	0.17129	0.978376	1	-5.1228
hsa-mir-1299	0.16341	0.16296	0.978376	1	-5.1191
AZI1	0.15072	0.15046	0.978376	1	-5.1164
OAF	0.17424	0.17383	0.978376	1	-5.1116
hsa-mir-665	0.21177	0.21095	0.978376	1	-5.1101
PARP8	0.17371	0.17329	0.978376	1	-5.1091
TALDO1	0.16724	0.16681	0.978376	1	-5.1057
ALK	0.1753	0.17488	0.978376	1	-5.1049
TAX1BP3	0.21237	0.21152	0.978376	1	-5.0931
hsa-mir-6777	0.21237	0.21152	0.978376	1	-5.0931
ATP5G1	0.17385	0.17341	0.978376	1	-5.0839
MAGEA6	0.1749	0.17446	0.978376	1	-5.0822
TNK2	0.14861	0.14829	0.978376	1	-5.082
SCGB1A1	0.16473	0.16428	0.978376	1	-5.0817
HAPLN4	0.17147	0.171	0.978376	1	-5.0795
C14orf159	0.1683	0.16794	0.978376	1	-5.0786
NRG3	0.17107	0.1706	0.978376	1	-5.0772
TSPO	0.21277	0.21194	0.978376	1	-5.0759
hsa-mir-4648	0.21277	0.21194	0.978376	1	-5.0759
PTPRC	0.0081274	0.007999	0.915794	1	-5.0662
FBXO48	0.17464	0.17424	0.978376	1	-5.0638
COA3	0.17623	0.1758	0.978376	1	-5.0627
DPT	0.1638	0.16335	0.978376	1	-5.0615
AIFM1	0.16354	0.1631	0.978376	1	-5.0565
FARS2	0.14993	0.14962	0.978376	1	-5.0564
DGKQ	0.17847	0.17813	0.978376	1	-5.0529
API5	0.14715	0.14684	0.978376	1	-5.0471
WNT1	0.17319	0.17278	0.978376	1	-5.0458
CHUK	0.17808	0.17773	0.978376	1	-5.0448
STXBP2	0.16195	0.16149	0.978376	1	-5.0426
HINT2	0.17821	0.17787	0.978376	1	-5.0425
FOXD2	0.21343	0.21257	0.978376	1	-5.0409
ITGA7	0.16631	0.16591	0.978376	1	-5.0378
hsa-mir-3166	0.17358	0.17317	0.978376	1	-5.0324
PCBD2	0.17702	0.17667	0.978376	1	-5.0295
ACOXL	0.16883	0.16845	0.978376	1	-5.029
RHAG	0.15204	0.15175	0.978376	1	-5.0238
LIPG	0.1527	0.15238	0.978376	1	-5.0171
SFTPB	0.17979	0.17936	0.978376	1	-5.0157
GPR97	0.14728	0.14698	0.978376	1	-5.0149
ZNF148	0.16922	0.16884	0.978376	1	-5.0122
TBX1	0.16076	0.16039	0.978376	1	-5.0023
BAG1	0.18098	0.18053	0.978376	1	-4.9985
hsa-mir-592	0.18151	0.181	0.978376	1	-4.9943
SEMA4D	0.17028	0.16981	0.978376	1	-4.9921
MTCP1	0.16975	0.16933	0.978376	1	-4.9858
OR10H4	0.17477	0.17435	0.978376	1	-4.9802
OTP	0.12601	0.12554	0.978376	1	-4.9779
PITPNB	0.15521	0.15482	0.978376	1	-4.9722
PEX6	0.16856	0.16817	0.978376	1	-4.9692
TBC1D3F	0.21481	0.21397	0.978376	1	-4.9683
PLSCR4	0.21481	0.21397	0.978376	1	-4.9683
LHPP	0.21481	0.21397	0.978376	1	-4.9683
CPVL	0.21481	0.21397	0.978376	1	-4.9683
COL17A1	0.21481	0.21397	0.978376	1	-4.9683
SNAPIN	0.17649	0.1761	0.978376	1	-4.9673
KCND2	0.15535	0.15496	0.978376	1	-4.9654
DNAH14	0.15482	0.15446	0.978376	1	-4.9648
C2	0.17305	0.17266	0.978376	1	-4.9643
CAPN12	0.17345	0.17304	0.978376	1	-4.9642
PTPN2	0.1716	0.17113	0.978376	1	-4.9566
SEMA4A	0.21548	0.21463	0.978376	1	-4.9496
RPL21	0.21548	0.21463	0.978376	1	-4.9496
AHNAK2	0.1712	0.17076	0.978376	1	-4.9477
COL1A2	0.1675	0.16708	0.978376	1	-4.9472
TAF13	0.17186	0.17143	0.978376	1	-4.9467
SCXB	0.18078	0.18033	0.978376	1	-4.9438
SCXA	0.18078	0.18033	0.978376	1	-4.9438
COMMD8	0.18045	0.18	0.978376	1	-4.9374
GUCY2F	0.18402	0.18343	0.978376	1	-4.9369
ACO2	0.1827	0.18221	0.978376	1	-4.9322
TBC1D7	0.17927	0.17887	0.978376	1	-4.9283
KIAA1210	0.18112	0.18066	0.978376	1	-4.9276
RPS5	0.17742	0.17709	0.978376	1	-4.9234
SNAPC4	0.18508	0.18449	0.978376	1	-4.9232
SRI	0.15852	0.15816	0.978376	1	-4.9188
YAE1D1	0.18482	0.18423	0.978376	1	-4.9106
hsa-mir-1229	0.18059	0.18012	0.978376	1	-4.9102
SNX7	0.15931	0.15894	0.978376	1	-4.9069
NPIPA5	0.11834	0.11777	0.978376	1	-4.9033
CRIM1	0.17398	0.17357	0.978376	1	-4.901
UHRF1BP1L	0.18495	0.18437	0.978376	1	-4.8996
AHSP	0.16327	0.16283	0.978376	1	-4.8948
hsa-mir-4297	0.18257	0.18208	0.978376	1	-4.8939
ZNF235	0.21713	0.21624	0.978376	1	-4.8918
CUBN	0.21713	0.21624	0.978376	1	-4.8918
hsa-mir-2392	0.1601	0.15974	0.978376	1	-4.8877
SETX	0.16935	0.16897	0.978376	1	-4.8833
COLQ	0.18363	0.18306	0.978376	1	-4.8814
TBL1X	0.17054	0.17008	0.978376	1	-4.8714
NKAPL	0.13447	0.13397	0.978376	1	-4.8686
AIFM3	0.18349	0.18291	0.978376	1	-4.8678
HNRNPM	0.14557	0.14525	0.978376	1	-4.8646
C8A	0.17583	0.17539	0.978376	1	-4.864
hsa-mir-1208	0.18667	0.18611	0.978376	1	-4.8591
TOMM20L	0.16169	0.16122	0.978376	1	-4.8584
ABTB2	0.18587	0.18531	0.978376	1	-4.8572
ELMO2	0.18178	0.18127	0.978376	1	-4.8526
UPRT	0.18455	0.18395	0.978376	1	-4.8525
ZDHHC19	0.21805	0.21721	0.978376	1	-4.852
TRIM74	0.21805	0.21721	0.978376	1	-4.852
TRIM73	0.21805	0.21721	0.978376	1	-4.852
SPINK1	0.21805	0.21721	0.978376	1	-4.852
GPATCH8	0.21805	0.21721	0.978376	1	-4.852
AKAP7	0.21805	0.21721	0.978376	1	-4.852
CPLX4	0.18825	0.18769	0.978376	1	-4.8431
C9orf131	0.18918	0.18869	0.978376	1	-4.8429
H2AFX	0.18891	0.18841	0.978376	1	-4.8428
UBE2QL1	0.18812	0.18756	0.978376	1	-4.841
FAM204A	0.18904	0.18855	0.978376	1	-4.8378
MAML1	0.18693	0.18638	0.978376	1	-4.8348
NACA2	0.21884	0.21802	0.978376	1	-4.8317
GDF3	0.21884	0.21802	0.978376	1	-4.8317
OMD	0.1868	0.18624	0.978376	1	-4.8271
hsa-mir-4677	0.18865	0.18811	0.978376	1	-4.8224
PPM1A	0.10552	0.10508	0.978376	1	-4.8196
MTR	0.18852	0.18797	0.978376	1	-4.8173
C9orf169	0.18601	0.18542	0.978376	1	-4.8113
SCARF2	0.21931	0.21847	0.978376	1	-4.8111
SMARCA4	0.17834	0.178	0.978376	1	-4.8038
SGMS2	0.19116	0.19065	0.978376	1	-4.8003
ERAS	0.1646	0.16416	0.978376	1	-4.7979
DPCR1	0.14147	0.14115	0.978376	1	-4.7954
BEND7	0.17887	0.17848	0.978376	1	-4.7943
PRKCSH	0.19037	0.18988	0.978376	1	-4.7936
hsa-mir-548aj-2	0.21984	0.21897	0.978376	1	-4.7901
ATP6V0C	0.18429	0.18371	0.978376	1	-4.7885
ACTA1	0.19142	0.19094	0.978376	1	-4.7877
LOC100862671	0.17913	0.17875	0.978376	1	-4.7874
KRTAP20-3	0.19129	0.19078	0.978376	1	-4.7835
LSMEM2	0.19195	0.19148	0.978376	1	-4.7774
XBP1	0.1794	0.179	0.978376	1	-4.7765
EXD3	0.16592	0.16551	0.978376	1	-4.7587
PITX1	0.17953	0.17911	0.978376	1	-4.7474
NPR2	0.22083	0.21996	0.978376	1	-4.7474
GALP	0.17794	0.17763	0.978376	1	-4.7415
hsa-mir-510	0.16737	0.16695	0.978376	1	-4.732
ITPRIPL2	0.18997	0.18952	0.978376	1	-4.7312
SLC38A1	0.1938	0.19326	0.978376	1	-4.7232
hsa-mir-4498	0.19261	0.19213	0.978376	1	-4.7226
MADD	0.16896	0.16857	0.978376	1	-4.7217
GJB2	0.18706	0.18651	0.978376	1	-4.7208
hsa-mir-95	0.1823	0.1818	0.978376	1	-4.7151
ZNF99	0.1681	0.16771	0.978376	1	-4.7131
ARMC12	0.1681	0.16771	0.978376	1	-4.7131
TXNL4B	0.18534	0.18476	0.978376	1	-4.7122
SUPT4H1	0.19512	0.19449	0.978376	1	-4.6954
GPHA2	0.16962	0.16922	0.978376	1	-4.6938
RNF186	0.19539	0.19476	0.978376	1	-4.6769
AP2A2	0.18336	0.18279	0.978376	1	-4.6754
SYCE3	0.18561	0.18502	0.978376	1	-4.6736
SLC5A8	0.18574	0.18516	0.978376	1	-4.6591
USP17L15	0.22294	0.22218	0.978376	1	-4.6578
BAK1	0.19671	0.19609	0.978376	1	-4.6469
SERPINA11	0.19658	0.19596	0.978376	1	-4.6465
BAX	0.19103	0.19051	0.978376	1	-4.6449
SLC19A2	0.22354	0.22272	0.978376	1	-4.6346
TLX1	0.0062015	0.011839	0.915794	1	-4.6244
SUDS3	0.19169	0.1912	0.978376	1	-4.6134
PDK2	0.22387	0.22306	0.978376	1	-4.6109
IFNA2	0.1975	0.19688	0.978376	1	-4.6014
TNFSF11	0.19856	0.19788	0.978376	1	-4.5924
SYCN	0.17451	0.1741	0.978376	1	-4.5757
EIF2B3	0.19486	0.19425	0.978376	1	-4.5687
RUFY1	0.22525	0.22441	0.978376	1	-4.5624
hsa-mir-5690	0.18878	0.18826	0.978376	1	-4.5556
RMND1	0.18442	0.18383	0.978376	1	-4.5425
XRCC6BP1	0.22565	0.22483	0.978376	1	-4.5375
TIMM23	0.22565	0.22483	0.978376	1	-4.5375
SMPDL3A	0.19235	0.19187	0.978376	1	-4.5349
METTL3	0.19975	0.19902	0.978376	1	-4.5223
ZNF527	0.19023	0.18975	0.978376	1	-4.5211
OR8D2	0.22611	0.22529	0.978376	1	-4.5122
MRPS6	0.22611	0.22529	0.978376	1	-4.5122
hsa-mir-376b	0.2271	0.22627	0.978376	1	-4.4864
CLIC2	0.19156	0.19106	0.978376	1	-4.4841
TMEM48	0.18634	0.18576	0.978376	1	-4.4836
NDC1	0.18634	0.18576	0.978376	1	-4.4836
CA12	0.22743	0.22664	0.978376	1	-4.4602
ITGA11	0.20213	0.20139	0.978376	1	-4.4557
ITGAD	0.18006	0.17961	0.978376	1	-4.447
MCF2L	0.18032	0.17987	0.978376	1	-4.4437
HBD	0.00072684	0.00074189	0.833722	1	-4.4336
NCAN	0.22816	0.22741	0.978376	1	-4.4334
RAMP1	0.19592	0.1953	0.978376	1	-4.4307
TMEM222	0.00092486	0.0018218	0.833722	1	-4.4285
LMO7	0.1942	0.19361	0.978376	1	-4.4179
ATG3	0.20133	0.20064	0.978376	1	-4.4154
SPINK5	0.18211	0.18158	0.978376	1	-4.4071
KDM5D	0.22862	0.22787	0.978376	1	-4.4062
hsa-mir-2053	0.22862	0.22787	0.978376	1	-4.4062
DMWD	0.22862	0.22787	0.978376	1	-4.4062
U2AF2	0.20186	0.20115	0.978376	1	-4.4057
NDUFV1	0.22922	0.22843	0.978376	1	-4.3784
HIVEP2	0.22922	0.22843	0.978376	1	-4.3784
CLIC6	0.22922	0.22843	0.978376	1	-4.3784
AKTIP	0.18323	0.18268	0.978376	1	-4.366
PVRL4	0.2016	0.2009	0.978376	1	-4.3599
SLC34A2	0.00013215	0.00026847	0.711221	1	-4.3578
PDP1	0.202	0.20127	0.978376	1	-4.3541
WDR33	0.22995	0.22914	0.978376	1	-4.3501
ANKDD1B	0.18415	0.18357	0.978376	1	-4.3485
EPC1	0.2049	0.20418	0.978376	1	-4.3305
SREBF1	0.23067	0.22991	0.978376	1	-4.3213
PRSS27	0.23067	0.22991	0.978376	1	-4.3213
NUMB	0.23067	0.22991	0.978376	1	-4.3213
CCDC135	0.23067	0.22991	0.978376	1	-4.3213
C9orf72	0.23067	0.22991	0.978376	1	-4.3213
hsa-mir-6821	0.20874	0.20789	0.978376	1	-4.3176
MYBPHL	0.20041	0.19968	0.978376	1	-4.3096
ZNF425	0.16704	0.1666	0.978376	1	-4.3042
AFF4	0.23147	0.23075	0.978376	1	-4.2918
IRF2BPL	0.20821	0.20741	0.978376	1	-4.2776
SUV420H2	0.2057	0.20497	0.978376	1	-4.2775
C9orf66	0.18719	0.18666	0.978376	1	-4.2727
hsa-mir-128-1	0.20239	0.20166	0.978376	1	-4.2719
RNF123	0.18759	0.18705	0.978376	1	-4.2653
ARL6IP6	0.20015	0.19943	0.978376	1	-4.2624
SFXN2	0.23252	0.2318	0.978376	1	-4.2617
ASMT_Y	0.23252	0.2318	0.978376	1	-4.2617
ASMT_X	0.23252	0.2318	0.978376	1	-4.2617
ABHD2	0.23252	0.2318	0.978376	1	-4.2617
CPZ	0.20371	0.20299	0.978376	1	-4.261
ZBTB1	0.18838	0.18785	0.978376	1	-4.2466
IFT46	0.064601	0.11322	0.978376	1	-4.2389
NUDT2	0.23351	0.2328	0.978376	1	-4.231
IARS	0.23351	0.2328	0.978376	1	-4.231
BLZF1	0.17332	0.17291	0.978376	1	-4.2309
LCE2A	0.20358	0.20287	0.978376	1	-4.2147
TBC1D31	0.18971	0.18925	0.978376	1	-4.2122
OSBP2	0.23457	0.2338	0.978376	1	-4.1996
KIF19	0.23457	0.2338	0.978376	1	-4.1996
SNX8	0.21072	0.20988	0.978376	1	-4.1935
hsa-mir-548a-1	0.20451	0.20381	0.978376	1	-4.1843
hsa-mir-548a-3	0.21191	0.21109	0.978376	1	-4.1816
USP22	0.21111	0.21027	0.978376	1	-4.1725
NEU3	0.21296	0.21212	0.978376	1	-4.1714
NODAL	0.18283	0.18232	0.978376	1	-4.166
NUP43	0.21257	0.21174	0.978376	1	-4.1659
hsa-mir-3131	0.20067	0.19995	0.978376	1	-4.1543
GSG1	0.19182	0.19134	0.978376	1	-4.1531
YDJC	0.23682	0.23614	0.978376	1	-4.1348
PDE11A	0.19248	0.19199	0.978376	1	-4.1328
hsa-mir-4666b	0.19869	0.19802	0.978376	1	-4.126
CYP2C9	0.20305	0.20233	0.978376	1	-4.1259
TMEM134	0.19301	0.19254	0.978376	1	-4.1205
CALML4	0.21442	0.21356	0.978376	1	-4.1116
hsa-mir-125a	0.19618	0.1956	0.978376	1	-4.1088
NSA2	0.20689	0.20614	0.978376	1	-4.1072
SHC1	0.20266	0.2019	0.978376	1	-4.1064
hsa-mir-301a	0.21429	0.21343	0.978376	1	-4.1062
RBM27	0.23768	0.23698	0.978376	1	-4.1012
FBXO27	0.23768	0.23698	0.978376	1	-4.1012
ATM	0.20715	0.2064	0.978376	1	-4.0936
VCX3A	0.085635	0.085328	0.978376	1	-4.0904
FA2H	0.21574	0.21487	0.978376	1	-4.0811
SLC22A16	0.23887	0.23822	0.978376	1	-4.0668
hsa-mir-4780	0.23887	0.23822	0.978376	1	-4.0668
CALHM3	0.19288	0.19241	0.978376	1	-4.0596
hsa-mir-34b	0.20398	0.20324	0.978376	1	-4.0568
TOP2A	0.19499	0.19438	0.978376	1	-4.0531
RPS17L	0.20418	0.20347	0.978376	1	-4.0443
RPS17	0.20418	0.20347	0.978376	1	-4.0443
TMEM50B	0.24012	0.23949	0.978376	1	-4.0316
PARP14	0.24012	0.23949	0.978376	1	-4.0316
MMP10	0.24012	0.23949	0.978376	1	-4.0316
ME3	0.20953	0.20867	0.978376	1	-4.0234
KCTD7	0.19407	0.19349	0.978376	1	-4.0182
GAL3ST1	0.19274	0.19226	0.978376	1	-4.0159
OTOL1	0.21587	0.21499	0.978376	1	-4.0034
CNOT7	0.21865	0.21781	0.978376	1	-3.9962
POU5F1B	0.24164	0.24104	0.978376	1	-3.9955
NYX	0.24164	0.24104	0.978376	1	-3.9955
NEK7	0.24164	0.24104	0.978376	1	-3.9955
GOLGA6L6	0.24164	0.24104	0.978376	1	-3.9955
CSF2RA_Y	0.24164	0.24104	0.978376	1	-3.9955
CSF2RA_X	0.24164	0.24104	0.978376	1	-3.9955
RAB15	0.21389	0.21305	0.978376	1	-3.979
UBALD1	0.21059	0.20974	0.978376	1	-3.9647
hsa-mir-3668	0.24303	0.24238	0.978376	1	-3.9585
RASGRP4	0.1498	0.14948	0.978376	1	-3.9573
hsa-mir-6831	0.19922	0.19853	0.978376	1	-3.9507
ANKIB1	0.21759	0.21672	0.978376	1	-3.9441
LECT1	0.21006	0.20921	0.978376	1	-3.9366
ZDHHC8	0.2168	0.21592	0.978376	1	-3.9277
ARHGAP25	0.21957	0.2187	0.978376	1	-3.927
RNF213	0.24369	0.24306	0.978376	1	-3.9205
MAT2A	0.24369	0.24306	0.978376	1	-3.9205
hsa-mir-3165	0.24369	0.24306	0.978376	1	-3.9205
GIPC2	0.24369	0.24306	0.978376	1	-3.9205
WDFY3	0.22129	0.22046	0.978376	1	-3.9146
MUTYH	0.2197	0.21882	0.978376	1	-3.9124
RIMBP2	0.22063	0.21976	0.978376	1	-3.9118
PET112	0.20834	0.20754	0.978376	1	-3.9098
CIZ1	0.19882	0.19812	0.978376	1	-3.9033
PCDHB2	0.21217	0.21135	0.978376	1	-3.8982
CSE1L	0.19777	0.19716	0.978376	1	-3.8958
C17orf80	0.209	0.20815	0.978376	1	-3.8867
KPNB1	0.21851	0.21769	0.978376	1	-3.8841
EDF1	0.19935	0.19865	0.978376	1	-3.884
USP7	0.24587	0.24529	0.978376	1	-3.8815
SLC9A3R2	0.24587	0.24529	0.978376	1	-3.8815
MDGA1	0.24587	0.24529	0.978376	1	-3.8815
LPCAT1	0.24587	0.24529	0.978376	1	-3.8815
ILF2	0.24587	0.24529	0.978376	1	-3.8815
IGBP1	0.24587	0.24529	0.978376	1	-3.8815
GRIN2B	0.24587	0.24529	0.978376	1	-3.8815
GMEB2	0.24587	0.24529	0.978376	1	-3.8815
CAMSAP1	0.24587	0.24529	0.978376	1	-3.8815
PPAP2A	0.22248	0.22169	0.978376	1	-3.8779
OR52N1	0.18548	0.18489	0.978376	1	-3.8707
ARHGAP17	0.17874	0.17837	0.978376	1	-3.8485
INSRR	0.21362	0.21279	0.978376	1	-3.8468
UQCRH	0.24713	0.24657	0.978376	1	-3.8414
LY9	0.24713	0.24657	0.978376	1	-3.8414
COL15A1	0.22274	0.22198	0.978376	1	-3.8348
TMEM43	0.20807	0.20731	0.978376	1	-3.8312
UTP6	0.21376	0.21292	0.978376	1	-3.822
TMPRSS11D	0.22407	0.22324	0.978376	1	-3.8212
SLC6A11	0.24917	0.24855	0.978376	1	-3.8001
PDCD1LG2	0.24917	0.24855	0.978376	1	-3.8001
MRPL9	0.24917	0.24855	0.978376	1	-3.8001
MAML2	0.24917	0.24855	0.978376	1	-3.8001
hsa-mir-6806	0.24917	0.24855	0.978376	1	-3.8001
ARHGEF38	0.24917	0.24855	0.978376	1	-3.8001
IZUMO3	0.21666	0.21578	0.978376	1	-3.7999
MYH9	0.2053	0.20456	0.978376	1	-3.7966
VPS45	0.22446	0.22362	0.978376	1	-3.7918
ARHGEF12	0.20887	0.20802	0.978376	1	-3.7628
SLC30A1	0.25083	0.2502	0.978376	1	-3.7577
RDH8	0.25083	0.2502	0.978376	1	-3.7577
KIAA1009	0.25083	0.2502	0.978376	1	-3.7577
hsa-mir-6882	0.25083	0.2502	0.978376	1	-3.7577
ELP5	0.25083	0.2502	0.978376	1	-3.7577
PCID2	0.20325	0.20254	0.978376	1	-3.7414
GATM	0.20325	0.20254	0.978376	1	-3.7414
VPS33A	0.25235	0.25172	0.978376	1	-3.7139
SCEL	0.25235	0.25172	0.978376	1	-3.7139
MMP1	0.25235	0.25172	0.978376	1	-3.7139
KHDRBS2	0.25235	0.25172	0.978376	1	-3.7139
POLR3C	0.22235	0.22155	0.978376	1	-3.6949
RALY	0.21693	0.21605	0.978376	1	-3.6861
STPG2	0.25439	0.25366	0.978376	1	-3.6688
RINL	0.25439	0.25366	0.978376	1	-3.6688
MTERFD1	0.25439	0.25366	0.978376	1	-3.6688
OXCT2	0.20028	0.19955	0.978376	1	-3.6668
ANO8	0.20517	0.20442	0.978376	1	-3.6531
hsa-mir-3674	0.22948	0.22868	0.978376	1	-3.6445
LIN54	0.22962	0.22882	0.978376	1	-3.6416
SLC41A1	0.20543	0.20471	0.978376	1	-3.6359
NKX1-2	0.25578	0.25509	0.978376	1	-3.6222
IL17RE	0.25578	0.25509	0.978376	1	-3.6222
C4orf3	0.25578	0.25509	0.978376	1	-3.6222
MOB2	0.21204	0.21122	0.978376	1	-3.617
RAB3IL1	0.21733	0.21643	0.978376	1	-3.6144
DYDC2	0.20596	0.2052	0.978376	1	-3.6068
EPX	0.22169	0.22089	0.978376	1	-3.597
PPP1CB	0.20794	0.20718	0.978376	1	-3.5964
PCSK2	0.22314	0.22236	0.978376	1	-3.5922
CYBA	0.20734	0.32736	0.978376	1	-3.5743
ZFYVE26	0.2575	0.2569	0.978376	1	-3.5741
ZFP57	0.2575	0.2569	0.978376	1	-3.5741
KCNJ15	0.2575	0.2569	0.978376	1	-3.5741
HSD17B3	0.2575	0.2569	0.978376	1	-3.5741
hsa-mir-4537	0.2575	0.2569	0.978376	1	-3.5741
HILPDA	0.2575	0.2569	0.978376	1	-3.5741
ZNF683	0.22539	0.22455	0.978376	1	-3.5734
NRIP3	0.2164	0.21552	0.978376	1	-3.5677
MRPS12	0.22142	0.22061	0.978376	1	-3.5655
ZNF430	0.21032	0.20946	0.978376	1	-3.5569
hsa-mir-3942	0.23199	0.23126	0.978376	1	-3.5499
SRP68	0.22433	0.2235	0.978376	1	-3.5372
QTRT1	0.25975	0.25925	0.978376	1	-3.5243
hsa-mir-498	0.25975	0.25925	0.978376	1	-3.5243
GJA3	0.25975	0.25925	0.978376	1	-3.5243
C17orf105	0.25975	0.25925	0.978376	1	-3.5243
BCL6	0.25975	0.25925	0.978376	1	-3.5243
BCL2L11	0.25975	0.25925	0.978376	1	-3.5243
GLOD5	0.23186	0.23112	0.978376	1	-3.5134
hsa-mir-5010	0.20107	0.2004	0.978376	1	-3.5025
ZNF592	0.26213	0.26163	0.978376	1	-3.4727
SMG1	0.26213	0.26163	0.978376	1	-3.4727
PALB2	0.26213	0.26163	0.978376	1	-3.4727
OR51D1	0.26213	0.26163	0.978376	1	-3.4727
MEF2A	0.26213	0.26163	0.978376	1	-3.4727
IFNA5	0.26213	0.26163	0.978376	1	-3.4727
hsa-mir-520f	0.26213	0.26163	0.978376	1	-3.4727
GNGT2	0.26213	0.26163	0.978376	1	-3.4727
CDKN2D	0.2242	0.22336	0.978376	1	-3.461
SPIN2A	0.22724	0.22642	0.978376	1	-3.4242
MEX3C	0.059403	0.059384	0.978376	1	-3.4203
ZNF14	0.2651	0.26465	0.978376	1	-3.4192
TMEM52B	0.2651	0.26465	0.978376	1	-3.4192
STMND1	0.2651	0.26465	0.978376	1	-3.4192
SMAD4	0.2651	0.26465	0.978376	1	-3.4192
RBMY1J	0.2651	0.26465	0.978376	1	-3.4192
RBMY1F	0.2651	0.26465	0.978376	1	-3.4192
OPHN1	0.2651	0.26465	0.978376	1	-3.4192
KLHDC7A	0.2651	0.26465	0.978376	1	-3.4192
KIF11	0.2651	0.26465	0.978376	1	-3.4192
JAK3	0.2651	0.26465	0.978376	1	-3.4192
ILK	0.2651	0.26465	0.978376	1	-3.4192
hsa-mir-3713	0.2651	0.26465	0.978376	1	-3.4192
ADSS	0.2651	0.26465	0.978376	1	-3.4192
SF3A3	0.21151	0.21067	0.978376	1	-3.4053
TMSB15A	0.060856	0.060803	0.978376	1	-3.3987
MAP2K3	0.21164	0.21082	0.978376	1	-3.3917
SUPT7L	0.091753	0.15715	0.978376	1	-3.3845
SSNA1	0.22155	0.22076	0.978376	1	-3.3753
ZNF133	0.22116	0.22031	0.978376	1	-3.3637
SYT12	0.26748	0.26704	0.978376	1	-3.3636
SPAM1	0.26748	0.26704	0.978376	1	-3.3636
MYOM2	0.26748	0.26704	0.978376	1	-3.3636
FN1	0.26748	0.26704	0.978376	1	-3.3636
FGF23	0.26748	0.26704	0.978376	1	-3.3636
CCDC38	0.26748	0.26704	0.978376	1	-3.3636
C22orf26	0.26748	0.26704	0.978376	1	-3.3636
MUSTN1	0.22697	0.22615	0.978376	1	-3.3515
CDKN2A	0.33029	0.43171	0.978376	1	-3.3309
OXNAD1	0.22261	0.22183	0.978376	1	-3.3305
SUSD3	0.23384	0.23313	0.978376	1	-3.3223
LRP6	0.2423	0.24167	0.978376	1	-3.3174
SLC25A52	0.27118	0.27074	0.978376	1	-3.3059
PTX4	0.27118	0.27074	0.978376	1	-3.3059
PKD2L2	0.27118	0.27074	0.978376	1	-3.3059
KLRF2	0.27118	0.27074	0.978376	1	-3.3059
GSTT2B	0.27118	0.27074	0.978376	1	-3.3059
GSTT2	0.27118	0.27074	0.978376	1	-3.3059
FAM65C	0.27118	0.27074	0.978376	1	-3.3059
FAM5C	0.27118	0.27074	0.978376	1	-3.3059
CYP26A1	0.27118	0.27074	0.978376	1	-3.3059
CXorf49B	0.27118	0.27074	0.978376	1	-3.3059
CXorf49	0.27118	0.27074	0.978376	1	-3.3059
CLEC14A	0.27118	0.27074	0.978376	1	-3.3059
HLA-G	0.24468	0.2441	0.978376	1	-3.2981
C20orf141	0.23834	0.23767	0.978376	1	-3.2871
IGDCC3	0.2279	0.2271	0.978376	1	-3.2864
DDX52	0.23807	0.23743	0.978376	1	-3.2864
CXXC4	0.24072	0.24012	0.978376	1	-3.2854
AFAP1L1	0.22367	0.22285	0.978376	1	-3.2842
hsa-mir-1285-1	0.056404	0.099579	0.978376	1	-3.2806
AP5S1	0.21415	0.21331	0.978376	1	-3.2782
FAM216B	0.24442	0.24384	0.978376	1	-3.2772
KIF4A	0.22777	0.22696	0.978376	1	-3.2579
ARL16	0.24759	0.24702	0.978376	1	-3.2527
DEFB132	0.24746	0.24689	0.978376	1	-3.2522
TBL1XR1	0.21521	0.21436	0.978376	1	-3.2484
SLC6A5	0.27402	0.27362	0.978376	1	-3.2457
PLD5	0.27402	0.27362	0.978376	1	-3.2457
PLAC1	0.27402	0.27362	0.978376	1	-3.2457
HIST1H1D	0.27402	0.27362	0.978376	1	-3.2457
C15orf38-AP3S2	0.1484	0.24374	0.978376	1	-3.2345
TMEM132E	0.23107	0.23031	0.978376	1	-3.232
UBXN6	0.23371	0.23298	0.978376	1	-3.2117
IHH	0.21627	0.21538	0.978376	1	-3.2102
PQLC2	0.2047	0.20397	0.978376	1	-3.2072
MYBL2	0.21085	0.21002	0.978376	1	-3.1991
hsa-mir-4456	0.069707	0.12148	0.978376	1	-3.1986
GABARAPL2	0.23821	0.23755	0.978376	1	-3.1942
SMCR7	0.27726	0.27687	0.978376	1	-3.1829
RNF149	0.27726	0.27687	0.978376	1	-3.1829
RASGRP1	0.27726	0.27687	0.978376	1	-3.1829
PGAP2	0.27726	0.27687	0.978376	1	-3.1829
PCDH11Y	0.27726	0.27687	0.978376	1	-3.1829
MIEF2	0.27726	0.27687	0.978376	1	-3.1829
MAP3K10	0.27726	0.27687	0.978376	1	-3.1829
hsa-mir-6859-3	0.27726	0.27687	0.978376	1	-3.1829
hsa-mir-6859-2	0.27726	0.27687	0.978376	1	-3.1829
hsa-mir-6859-1	0.27726	0.27687	0.978376	1	-3.1829
hsa-mir-1-2	0.27726	0.27687	0.978376	1	-3.1829
FGFR1OP2	0.27726	0.27687	0.978376	1	-3.1829
ELF2	0.27726	0.27687	0.978376	1	-3.1829
CNPY2	0.27726	0.27687	0.978376	1	-3.1829
ATXN10	0.27726	0.27687	0.978376	1	-3.1829
FAM129C	0.025082	0.04619	0.978376	1	-3.1754
ERP27	0.22763	0.22684	0.978376	1	-3.1704
OPN4	0.10196	0.10148	0.978376	1	-3.1324
OR4K15	0.28096	0.28045	0.978376	1	-3.1172
MDGA2	0.28096	0.28045	0.978376	1	-3.1172
JDP2	0.28096	0.28045	0.978376	1	-3.1172
ARL14EPL	0.28096	0.28045	0.978376	1	-3.1172
OR14J1	0.21904	0.21819	0.978376	1	-3.1142
MAN2B1	0.11041	0.10995	0.978376	1	-3.1114
CKMT2	0.23305	0.23233	0.978376	1	-3.111
SUCLG1	0.089737	0.15396	0.978376	1	-3.1073
DRAXIN	0.21918	0.21834	0.978376	1	-3.1059
MBP	0.22486	0.22403	0.978376	1	-3.102
DIDO1	0.24428	0.24368	0.978376	1	-3.0926
PDCD10	0.21997	0.21909	0.978376	1	-3.0723
hsa-mir-6081	0.20728	0.20651	0.978376	1	-3.059
ZNF835	0.28452	0.2839	0.978376	1	-3.0484
PALM3	0.28452	0.2839	0.978376	1	-3.0484
NDST2	0.28452	0.2839	0.978376	1	-3.0484
NDC80	0.28452	0.2839	0.978376	1	-3.0484
HSPB6	0.28452	0.2839	0.978376	1	-3.0484
hsa-mir-4431	0.28452	0.2839	0.978376	1	-3.0484
hsa-mir-153-2	0.28452	0.2839	0.978376	1	-3.0484
FYN	0.28452	0.2839	0.978376	1	-3.0484
F7	0.28452	0.2839	0.978376	1	-3.0484
C1orf63	0.28452	0.2839	0.978376	1	-3.0484
AHSA2	0.28452	0.2839	0.978376	1	-3.0484
MYO1D	0.24415	0.24352	0.978376	1	-3.048
SIRPD	0.20926	0.20841	0.978376	1	-3.0467
PAK1	0.20926	0.20841	0.978376	1	-3.0467
TEX2	0.25142	0.2508	0.978376	1	-3.0424
NDUFAF5	0.23292	0.23219	0.978376	1	-3.0313
DYM	0.23622	0.23551	0.978376	1	-3.0242
GCN1L1	0.23028	0.22949	0.978376	1	-3.0184
HNRNPH1	0.24111	0.24053	0.978376	1	-3.0038
TMEM59	0.17153	0.27741	0.978376	1	-2.9862
TNFRSF11A	0.28994	0.28935	0.978376	1	-2.9762
RNASEH2B	0.28994	0.28935	0.978376	1	-2.9762
KRTAP5-5	0.28994	0.28935	0.978376	1	-2.9762
ITIH4	0.28994	0.28935	0.978376	1	-2.9762
GTF2IRD2B	0.28994	0.28935	0.978376	1	-2.9762
GTF2IRD2	0.28994	0.28935	0.978376	1	-2.9762
EFCAB9	0.28994	0.28935	0.978376	1	-2.9762
CTSH	0.28994	0.28935	0.978376	1	-2.9762
CDNF	0.28994	0.28935	0.978376	1	-2.9762
C11orf65	0.28994	0.28935	0.978376	1	-2.9762
ARRB2	0.28994	0.28935	0.978376	1	-2.9762
CTAG2	0.11105	0.18725	0.978376	1	-2.9705
hsa-mir-4717	0.28946	0.40716	0.978376	1	-2.9695
CXorf21	0.23794	0.2373	0.978376	1	-2.9688
PDE4A	0.26361	0.39197	0.978376	1	-2.9458
TM4SF1	0.20558	0.32495	0.978376	1	-2.9408
CDH24	0.12049	0.20179	0.978376	1	-2.9322
HLA-DMB	0.24098	0.24038	0.978376	1	-2.9286
C16orf59	0.23926	0.23866	0.978376	1	-2.9284
FAM103A1	0.24732	0.24677	0.978376	1	-2.9221
COMMD6	0.11776	0.1977	0.978376	1	-2.9196
PRAMEF11	0.20642	0.20565	0.978376	1	-2.9093
hsa-mir-6852	0.25291	0.38592	0.978376	1	-2.9022
OR7C2	0.24825	0.24766	0.978376	1	-2.9003
TP63	0.2949	0.29428	0.978376	1	-2.9001
STAG3	0.2949	0.29428	0.978376	1	-2.9001
SENP2	0.2949	0.29428	0.978376	1	-2.9001
S100A16	0.2949	0.29428	0.978376	1	-2.9001
RASSF5	0.2949	0.29428	0.978376	1	-2.9001
PMM1	0.2949	0.29428	0.978376	1	-2.9001
PDIA3	0.2949	0.29428	0.978376	1	-2.9001
NCOA7	0.2949	0.29428	0.978376	1	-2.9001
HAPLN1	0.2949	0.29428	0.978376	1	-2.9001
DDX3X	0.13776	0.22794	0.978376	1	-2.896
MGAT1	0.081397	0.14045	0.978376	1	-2.8957
C8orf82	0.22459	0.22377	0.978376	1	-2.8921
PSMB3	0.26107	0.26055	0.978376	1	-2.8906
HRC	0.23213	0.23138	0.978376	1	-2.8811
hsa-mir-6868	0.23411	0.23339	0.978376	1	-2.8802
ZXDB	0.15416	0.15384	0.978376	1	-2.8711
ZNF620	0.23503	0.2343	0.978376	1	-2.8488
CMTM7	0.2205	0.21963	0.978376	1	-2.834
CELSR1	0.24257	0.24191	0.978376	1	-2.8289
SHANK1	0.24785	0.24725	0.978376	1	-2.8216
SPATA9	0.29999	0.29942	0.978376	1	-2.8199
SLC26A10	0.29999	0.29942	0.978376	1	-2.8199
MSTO1	0.29999	0.29942	0.978376	1	-2.8199
KRT27	0.29999	0.29942	0.978376	1	-2.8199
CHRM1	0.29999	0.29942	0.978376	1	-2.8199
C5orf38	0.29999	0.29942	0.978376	1	-2.8199
ATG2A	0.29999	0.29942	0.978376	1	-2.8199
RIMS4	0.26041	0.2599	0.978376	1	-2.8075
TMEM116	0.27283	0.27245	0.978376	1	-2.7912
RNPS1	0.15849	0.25863	0.978376	1	-2.7795
SH3GLB1	0.2349	0.23414	0.978376	1	-2.7675
PGLYRP3	0.2386	0.23793	0.978376	1	-2.7644
GRIA4	0.066901	0.117	0.978376	1	-2.7639
hsa-mir-644a	0.20204	0.32	0.978376	1	-2.7543
LGR5	0.074036	0.12861	0.978376	1	-2.7447
ZWINT	0.23913	0.23849	0.978376	1	-2.7388
TYRO3	0.30613	0.30551	0.978376	1	-2.7348
TREM1	0.30613	0.30551	0.978376	1	-2.7348
TMPRSS11A	0.30613	0.30551	0.978376	1	-2.7348
SRSF10	0.30613	0.30551	0.978376	1	-2.7348
SMAD2	0.30613	0.30551	0.978376	1	-2.7348
RPL3L	0.30613	0.30551	0.978376	1	-2.7348
PPP1R16B	0.30613	0.30551	0.978376	1	-2.7348
MAN2A1	0.30613	0.30551	0.978376	1	-2.7348
KCNK5	0.30613	0.30551	0.978376	1	-2.7348
KCNIP3	0.30613	0.30551	0.978376	1	-2.7348
HTR3E	0.30613	0.30551	0.978376	1	-2.7348
hsa-mir-4438	0.30613	0.30551	0.978376	1	-2.7348
hsa-mir-3921	0.30613	0.30551	0.978376	1	-2.7348
hsa-mir-302a	0.30613	0.30551	0.978376	1	-2.7348
hsa-mir-129-1	0.30613	0.30551	0.978376	1	-2.7348
hsa-mir-1286	0.30613	0.30551	0.978376	1	-2.7348
hsa-mir-1269a	0.30613	0.30551	0.978376	1	-2.7348
GPR137B	0.30613	0.30551	0.978376	1	-2.7348
FBP2	0.30613	0.30551	0.978376	1	-2.7348
C5orf22	0.30613	0.30551	0.978376	1	-2.7348
BATF2	0.30613	0.30551	0.978376	1	-2.7348
ARNT	0.30613	0.30551	0.978376	1	-2.7348
ACP5	0.30613	0.30551	0.978376	1	-2.7348
PRX	0.15495	0.15457	0.978376	1	-2.7343
SEZ6	0.27851	0.27808	0.978376	1	-2.7227
RGS14	0.22592	0.2251	0.978376	1	-2.7125
C11orf52	0.23383	0.36316	0.978376	1	-2.7109
WIPF1	0.24243	0.24178	0.978376	1	-2.6865
POTEM	0.054862	0.097031	0.978376	1	-2.6743
POTEJ	0.054862	0.097031	0.978376	1	-2.6743
POTEH	0.054862	0.097031	0.978376	1	-2.6743
POTEF	0.054862	0.097031	0.978376	1	-2.6743
POTEE	0.054862	0.097031	0.978376	1	-2.6743
ZNF558	0.22687	0.35395	0.978376	1	-2.6677
EFNA5	0.24217	0.24153	0.978376	1	-2.6625
PMP2	0.24489	0.37771	0.978376	1	-2.6562
DMRTC2	0.026908	0.04938	0.978376	1	-2.6523
UTP14C	0.31076	0.31016	0.978376	1	-2.6445
RCAN2	0.31076	0.31016	0.978376	1	-2.6445
KIF3C	0.31076	0.31016	0.978376	1	-2.6445
hsa-mir-548i-1	0.31076	0.31016	0.978376	1	-2.6445
ETV5	0.31076	0.31016	0.978376	1	-2.6445
EP400	0.31076	0.31016	0.978376	1	-2.6445
CHST12	0.31076	0.31016	0.978376	1	-2.6445
ACSM2A	0.31076	0.31016	0.978376	1	-2.6445
hsa-mir-9-1	0.22975	0.22895	0.978376	1	-2.6386
USP17L1P	0.043652	0.078167	0.978376	1	-2.6329
UBP1	0.2834	0.28277	0.978376	1	-2.6316
hsa-mir-4644	0.23609	0.23536	0.978376	1	-2.6265
GUCA1B	0.30342	0.41564	0.978376	1	-2.6189
KLHDC1	0.22083	0.21996	0.978376	1	-2.6185
RTKN2	0.27296	0.27257	0.978376	1	-2.6177
MT3	0.25155	0.25093	0.978376	1	-2.6128
LARGE	0.2797	0.27924	0.978376	1	-2.5976
CD200	0.30959	0.41927	0.978376	1	-2.5858
ARHGAP35	0.23173	0.23098	0.978376	1	-2.5679
PTGDR2	0.34042	0.4381	0.978376	1	-2.5612
YME1L1	0.31888	0.31846	0.978376	1	-2.5481
USH1C	0.31888	0.31846	0.978376	1	-2.5481
TUFT1	0.31888	0.31846	0.978376	1	-2.5481
SMIM11	0.31888	0.31846	0.978376	1	-2.5481
SLC6A9	0.31888	0.31846	0.978376	1	-2.5481
SLC30A9	0.31888	0.31846	0.978376	1	-2.5481
SGMS1	0.31888	0.31846	0.978376	1	-2.5481
RS1	0.31888	0.31846	0.978376	1	-2.5481
RRAGB	0.31888	0.31846	0.978376	1	-2.5481
RMI1	0.31888	0.31846	0.978376	1	-2.5481
RIOK2	0.31888	0.31846	0.978376	1	-2.5481
OSBPL2	0.31888	0.31846	0.978376	1	-2.5481
OR4N4	0.31888	0.31846	0.978376	1	-2.5481
OR11H4	0.31888	0.31846	0.978376	1	-2.5481
OC90	0.31888	0.31846	0.978376	1	-2.5481
MAPK15	0.31888	0.31846	0.978376	1	-2.5481
LDB1	0.31888	0.31846	0.978376	1	-2.5481
KCNJ16	0.31888	0.31846	0.978376	1	-2.5481
hsa-mir-4798	0.31888	0.31846	0.978376	1	-2.5481
hsa-mir-4797	0.31888	0.31846	0.978376	1	-2.5481
hsa-mir-4488	0.31888	0.31846	0.978376	1	-2.5481
hsa-mir-4443	0.31888	0.31846	0.978376	1	-2.5481
hsa-mir-379	0.31888	0.31846	0.978376	1	-2.5481
FAHD1	0.31888	0.31846	0.978376	1	-2.5481
EHMT2	0.31888	0.31846	0.978376	1	-2.5481
EFHC1	0.31888	0.31846	0.978376	1	-2.5481
DUSP11	0.31888	0.31846	0.978376	1	-2.5481
DNASE1	0.31888	0.31846	0.978376	1	-2.5481
CCM2L	0.31888	0.31846	0.978376	1	-2.5481
CAST	0.31888	0.31846	0.978376	1	-2.5481
C18orf32	0.31888	0.31846	0.978376	1	-2.5481
ANKRD52	0.31888	0.31846	0.978376	1	-2.5481
ADM	0.31888	0.31846	0.978376	1	-2.5481
AADAC	0.31888	0.31846	0.978376	1	-2.5481
VN1R5	0.26622	0.26578	0.978376	1	-2.5474
MMP7	0.27983	0.27937	0.978376	1	-2.5469
RPL5	0.29371	0.293	0.978376	1	-2.5456
SAMD9	0.23937	0.37055	0.978376	1	-2.5325
TXNDC16	0.23325	0.23253	0.978376	1	-2.5312
PNLIP	0.23325	0.23253	0.978376	1	-2.5312
hsa-mir-647	0.25792	0.38875	0.978376	1	-2.5184
FAM174A	0.25869	0.25818	0.978376	1	-2.5178
TNFSF13B	0.26926	0.26886	0.978376	1	-2.5155
RBAK-LOC389458	0.19447	0.30963	0.978376	1	-2.5063
PA2G4	0.26913	0.26872	0.978376	1	-2.5061
CRNN	0.25895	0.25842	0.978376	1	-2.4902
PENK	0.35547	0.44736	0.978376	1	-2.4878
C1orf106	0.28248	0.28189	0.978376	1	-2.4735
ZNF740	0.13075	0.21756	0.978376	1	-2.4594
hsa-mir-30d	0.29358	0.29286	0.978376	1	-2.4586
WDR18	0.32787	0.32765	0.978376	1	-2.4448
UXT	0.32787	0.32765	0.978376	1	-2.4448
UNC13A	0.32787	0.32765	0.978376	1	-2.4448
SNRPC	0.32787	0.32765	0.978376	1	-2.4448
SNED1	0.32787	0.32765	0.978376	1	-2.4448
RCE1	0.32787	0.32765	0.978376	1	-2.4448
PRY2	0.32787	0.32765	0.978376	1	-2.4448
PRY	0.32787	0.32765	0.978376	1	-2.4448
POM121L12	0.32787	0.32765	0.978376	1	-2.4448
LOC730159	0.32787	0.32765	0.978376	1	-2.4448
HDAC4	0.32787	0.32765	0.978376	1	-2.4448
GRIK2	0.30415	0.30359	0.978376	1	-2.4448
DNAL1	0.32787	0.32765	0.978376	1	-2.4448
CMPK2	0.32787	0.32765	0.978376	1	-2.4448
ASRGL1	0.32787	0.32765	0.978376	1	-2.4448
KIAA1191	0.23636	0.23564	0.978376	1	-2.4418
SRCIN1	0.26599	0.39345	0.978376	1	-2.4414
TUBG1	0.27336	0.27295	0.978376	1	-2.4379
ZNF600	0.31025	0.41967	0.978376	1	-2.4222
ZNF775	0.2468	0.24619	0.978376	1	-2.4124
KNG1	0.28155	0.28099	0.978376	1	-2.4069
hsa-mir-5681b	0.25175	0.25116	0.978376	1	-2.4061
hsa-mir-5681a	0.25175	0.25116	0.978376	1	-2.4061
GPR160	0.39618	0.47299	0.978376	1	-2.4057
RBM48	0.26094	0.2604	0.978376	1	-2.4052
hsa-mir-548q	0.19684	0.19623	0.978376	1	-2.3913
KATNA1	0.040936	0.07359	0.978376	1	-2.3722
MAMLD1	0.11204	0.18877	0.978376	1	-2.3637
RFNG	0.25393	0.25322	0.978376	1	-2.3622
KRTAP12-2	0.23728	0.23657	0.978376	1	-2.3556
ACOT12	0.269	0.26861	0.978376	1	-2.3555
TMEM145	0.25829	0.25778	0.978376	1	-2.3536
FIBIN	0.2793	0.27882	0.978376	1	-2.3361
ZNF408	0.3393	0.33915	0.978376	1	-2.3336
VWA2	0.3393	0.33915	0.978376	1	-2.3336
USB1	0.3393	0.33915	0.978376	1	-2.3336
UBE2O	0.3393	0.33915	0.978376	1	-2.3336
TMF1	0.3393	0.33915	0.978376	1	-2.3336
SYVN1	0.26886	0.26848	0.978376	1	-2.3336
SLC39A3	0.3393	0.33915	0.978376	1	-2.3336
PRRG1	0.3393	0.33915	0.978376	1	-2.3336
PPP2R2C	0.3393	0.33915	0.978376	1	-2.3336
PPIAL4G	0.3393	0.33915	0.978376	1	-2.3336
PNMAL2	0.3393	0.33915	0.978376	1	-2.3336
PHF16	0.3393	0.33915	0.978376	1	-2.3336
PGF	0.3393	0.33915	0.978376	1	-2.3336
OR56A1	0.3393	0.33915	0.978376	1	-2.3336
NFYC	0.3393	0.33915	0.978376	1	-2.3336
NFIX	0.3393	0.33915	0.978376	1	-2.3336
NEDD4L	0.3393	0.33915	0.978376	1	-2.3336
MESDC2	0.3393	0.33915	0.978376	1	-2.3336
LRRTM1	0.3393	0.33915	0.978376	1	-2.3336
KRTAP10-2	0.3393	0.33915	0.978376	1	-2.3336
HSP90B1	0.3393	0.33915	0.978376	1	-2.3336
hsa-mir-4255	0.3393	0.33915	0.978376	1	-2.3336
HOGA1	0.3393	0.33915	0.978376	1	-2.3336
HIST1H3C	0.3393	0.33915	0.978376	1	-2.3336
GABRA5	0.3393	0.33915	0.978376	1	-2.3336
FOXP3	0.3393	0.33915	0.978376	1	-2.3336
FFAR3	0.3393	0.33915	0.978376	1	-2.3336
EXOC5	0.3393	0.33915	0.978376	1	-2.3336
EBF2	0.3393	0.33915	0.978376	1	-2.3336
CLCC1	0.3393	0.33915	0.978376	1	-2.3336
CASS4	0.3393	0.33915	0.978376	1	-2.3336
C18orf54	0.3393	0.33915	0.978376	1	-2.3336
ASAP1	0.3393	0.33915	0.978376	1	-2.3336
ADAMTS13	0.3393	0.33915	0.978376	1	-2.3336
ABCA9	0.3393	0.33915	0.978376	1	-2.3336
FAM72B	0.23959	0.23897	0.978376	1	-2.3323
FAM72A	0.23959	0.23897	0.978376	1	-2.3323
hsa-mir-409	0.32357	0.42759	0.978376	1	-2.3238
SPEM1	0.2727	0.27232	0.978376	1	-2.3201
TTYH1	0.24052	0.23992	0.978376	1	-2.3181
SRCAP	0.24052	0.23992	0.978376	1	-2.3181
FRMPD4	0.28776	0.28722	0.978376	1	-2.3085
SUSD2	0.2682	0.2678	0.978376	1	-2.3066
NPS	0.17801	0.28644	0.978376	1	-2.2955
SHMT1	0.25631	0.25562	0.978376	1	-2.2939
SIPA1L1	0.31433	0.31381	0.978376	1	-2.2897
NCR3LG1	0.24997	0.2493	0.978376	1	-2.2896
NMNAT3	0.22036	0.2195	0.978376	1	-2.2754
EIF4G1	0.2501	0.24944	0.978376	1	-2.2749
MGAM	0.26873	0.26834	0.978376	1	-2.2735
NARS2	0.23939	0.23876	0.978376	1	-2.2731
EMC1	0.38545	0.46613	0.978376	1	-2.2624
VTA1	0.2427	0.24204	0.978376	1	-2.2594
LNPEP	0.24402	0.24338	0.978376	1	-2.2522
LDHC	0.29252	0.29177	0.978376	1	-2.2481
BBIP1	0.30111	0.30052	0.978376	1	-2.2444
TPM1	0.30071	0.30016	0.978376	1	-2.2171
ZSCAN25	0.35225	0.35192	0.978376	1	-2.2131
ZNF660	0.35225	0.35192	0.978376	1	-2.2131
ZC3H12B	0.35225	0.35192	0.978376	1	-2.2131
UTS2R	0.35225	0.35192	0.978376	1	-2.2131
TBRG4	0.35225	0.35192	0.978376	1	-2.2131
SLC2A4RG	0.35225	0.35192	0.978376	1	-2.2131
OR6C65	0.35225	0.35192	0.978376	1	-2.2131
MYH10	0.35225	0.35192	0.978376	1	-2.2131
MILR1	0.35225	0.35192	0.978376	1	-2.2131
MDFIC	0.35225	0.35192	0.978376	1	-2.2131
hsa-mir-3714	0.35225	0.35192	0.978376	1	-2.2131
GLT8D2	0.35225	0.35192	0.978376	1	-2.2131
ERBB3	0.35225	0.35192	0.978376	1	-2.2131
CHST4	0.35225	0.35192	0.978376	1	-2.2131
CCRL1	0.35225	0.35192	0.978376	1	-2.2131
C5orf42	0.35225	0.35192	0.978376	1	-2.2131
BSCL2	0.35225	0.35192	0.978376	1	-2.2131
ACSL5	0.35225	0.35192	0.978376	1	-2.2131
ACKR4	0.35225	0.35192	0.978376	1	-2.2131
GABRR2	0.2756	0.27524	0.978376	1	-2.2093
SLC5A1	0.31459	0.3141	0.978376	1	-2.2054
MFAP1	0.24455	0.24398	0.978376	1	-2.1827
TNK1	0.29794	0.2973	0.978376	1	-2.1761
RDH14	0.24495	0.24436	0.978376	1	-2.1668
UGT3A2	0.22058	0.34525	0.978376	1	-2.1623
HIST1H4G	0.2612	0.26068	0.978376	1	-2.1552
VANGL2	0.43626	0.49937	0.995746	1	-2.1323
hsa-mir-4781	0.32595	0.32575	0.978376	1	-2.13
SHISA3	0.30243	0.30186	0.978376	1	-2.1226
HMGCL	0.31965	0.42531	0.978376	1	-2.1223
MUC20	0.41098	0.48255	0.978856	1	-2.1175
H2AFB3	0.2899	0.40741	0.978376	1	-2.1159
H2AFB2	0.2899	0.40741	0.978376	1	-2.1159
H2AFB1	0.2899	0.40741	0.978376	1	-2.1159
PPP2R2A	0.32424	0.32401	0.978376	1	-2.11
NKAP	0.31353	0.313	0.978376	1	-2.1017
SYCP1	0.33428	0.33402	0.978376	1	-2.101
MX2	0.23147	0.23075	0.978376	1	-2.0994
EMD	0.23147	0.23075	0.978376	1	-2.0994
SIRT2	0.35281	0.44565	0.978376	1	-2.0989
RPS27	0.092761	0.15873	0.978376	1	-2.0955
XPNPEP2	0.34498	0.34487	0.978376	1	-2.0858
PDCD5	0.32173	0.32134	0.978376	1	-2.0844
ZMPSTE24	0.36468	0.36411	0.978376	1	-2.0815
UGDH	0.36468	0.36411	0.978376	1	-2.0815
UCHL1	0.36468	0.36411	0.978376	1	-2.0815
TTC24	0.36468	0.36411	0.978376	1	-2.0815
TGDS	0.36468	0.36411	0.978376	1	-2.0815
TEAD1	0.36468	0.36411	0.978376	1	-2.0815
STAM	0.36468	0.36411	0.978376	1	-2.0815
SMIM3	0.36468	0.36411	0.978376	1	-2.0815
SLC9A7	0.36468	0.36411	0.978376	1	-2.0815
[truncated: 572 more rows]

## Sheet: MAGeCK (omentum vs primary)
Supplementary Table 1. Genes with sgRNA(s) enriched in the primary OC xenograft cells
Gene ID	Score	P value	FDR	Good sgRNA number	Log2 (fold change, Dissminated/Primary OC)
SSBP2	0.029947	0.074805	0.953186	3	-4.4715
RBP4	0.028921	0.0724	0.953186	3	-4.2831
hsa-mir-6715b	0.0057764	0.015438	0.929821	3	-3.7741
hsa-mir-6715a	0.0057764	0.015438	0.929821	3	-3.7741
SPAG11B	0.0060246	0.011482	0.929821	2	-6.2569
LAYN	0.018652	0.034562	0.929821	2	-6.0318
MEOX2	0.013416	0.02516	0.929821	2	-5.8815
DOCK7	0.09304	0.15891	0.969469	2	-5.6844
NBL1	0.032433	0.058996	0.953186	2	-5.5852
C1orf151-NBL1	0.032433	0.058996	0.953186	2	-5.5852
hsa-mir-6083	0.028761	0.052548	0.953186	2	-5.5707
OR9G4	0.037217	0.06735	0.953186	2	-5.4839
TMUB1	0.036299	0.065782	0.953186	2	-5.4627
PCNX	0.0089424	0.016791	0.929821	2	-4.9187
ZNF518B	0.072436	0.12563	0.969469	2	-4.8334
TICRR	0.0042673	0.0081814	0.929821	2	-4.7446
RBAK-LOC389458	0.0026524	0.0051891	0.929821	2	-4.7244
OR52K1	0.015272	0.039504	0.929821	2	-4.6882
TAF4B	0.018389	0.034138	0.929821	2	-4.6577
OR51A2	0.004425	0.008455	0.929821	2	-4.5745
GAB2	0.0035374	0.0067924	0.929821	2	-4.484
PET117	0.0088671	0.016631	0.929821	2	-4.4798
PDE4A	0.012184	0.02293	0.929821	2	-4.4417
CTBS	0.069112	0.1203	0.969469	2	-4.4363
SAR1B	0.024962	0.045767	0.95048	2	-4.4273
NFKBIB	0.013338	0.034784	0.929821	2	-4.3978
PENK	0.078868	0.13598	0.969469	2	-4.3765
UBR5	0.0063486	0.012063	0.929821	2	-4.3065
C19orf44	0.0092977	0.017429	0.929821	2	-4.3009
PTGDR2	0.072794	0.12625	0.969469	2	-4.2834
INTS2	0.18598	0.2948	0.97378	2	-4.2583
IFI6	0.10768	0.18188	0.97378	2	-4.2524
TMEM222	0.01549	0.028936	0.929821	2	-4.2417
AGBL3	0.015792	0.029509	0.929821	2	-4.2304
CDH15	0.025078	0.045953	0.95048	2	-4.1921
GOLGA6A	0.01458	0.027258	0.929821	2	-4.1849
hsa-mir-516a-2	0.027095	0.049594	0.953186	2	-4.1754
MBOAT2	0.037422	0.067717	0.953186	2	-4.1699
GNG4	0.013726	0.025727	0.929821	2	-4.1508
GPR33	0.046883	0.11149	0.969469	2	-4.1469
SIRT2	0.09606	0.16385	0.969469	2	-4.145
TDRD3	0.020853	0.038486	0.929821	2	-4.1431
hsa-mir-3914-2	0.025395	0.046524	0.95048	2	-4.1297
NOD1	0.016672	0.031128	0.929821	2	-4.1283
DNAJB9	0.019642	0.036298	0.929821	2	-4.1124
KISS1	0.029191	0.053252	0.953186	2	-4.1073
NF1	0.038666	0.06994	0.953186	2	-4.0637
MDFI	0.015959	0.02983	0.929821	2	-4.0082
GABRB1	0.025224	0.046234	0.95048	2	-3.9675
hsa-mir-106a	0.039086	0.070642	0.953186	2	-3.9668
OR5D18	0.089308	0.15296	0.969469	2	-3.9391
PIP5K1B	0.028469	0.052027	0.953186	2	-3.9319
SLC34A2	0.023912	0.043977	0.95048	2	-3.888
POU5F2	0.09627	0.16419	0.969469	2	-3.8658
hsa-mir-6134	0.024326	0.044676	0.95048	2	-3.7499
hsa-mir-1285-1	0.042193	0.075788	0.953186	2	-3.7212
hsa-mir-4490	0.12202	0.21263	0.97378	2	-3.6914
STX17	0.062268	0.10917	0.969469	2	-3.6892
CT47A4	0.088581	0.16793	0.969469	2	-3.6709
CT47A6	0.088581	0.16793	0.969469	2	-3.6709
CT47A9	0.088581	0.16793	0.969469	2	-3.6709
CT47A11	0.088581	0.16793	0.969469	2	-3.6709
CT47A2	0.088581	0.16793	0.969469	2	-3.6709
CT47A10	0.088581	0.16793	0.969469	2	-3.6709
CT47A12	0.088581	0.16793	0.969469	2	-3.6709
CT47A7	0.088581	0.16793	0.969469	2	-3.6709
CT47A5	0.088581	0.16793	0.969469	2	-3.6709
CT47A1	0.088581	0.16793	0.969469	2	-3.6709
CT47A8	0.088581	0.16793	0.969469	2	-3.6709
CT47A3	0.088581	0.16793	0.969469	2	-3.6709
SMC1A	0.10111	0.17169	0.969469	2	-3.6511
MPP3	0.045136	0.080806	0.953887	2	-3.6507
USP17L1P	0.045788	0.081845	0.953887	2	-3.6489
POTEM	0.036884	0.066811	0.953186	2	-3.6411
POTEH	0.036884	0.066811	0.953186	2	-3.6411
POTEF	0.036884	0.066811	0.953186	2	-3.6411
POTEJ	0.036884	0.066811	0.953186	2	-3.6411
POTEE	0.036884	0.066811	0.953186	2	-3.6411
DDX23	0.080788	0.15744	0.969469	2	-3.6275
ADH5	0.039507	0.071362	0.953186	2	-3.609
ACAD9	0.044029	0.078868	0.953186	2	-3.5913
POTEI	0.096485	0.17878	0.969469	2	-3.5676
TBC1D4	0.26747	0.39657	0.97378	2	-3.5658
ZNF177	0.12107	0.20243	0.97378	2	-3.5435
ZNF559-ZNF177	0.12107	0.20243	0.97378	2	-3.5435
hsa-mir-4999	0.055498	0.098154	0.969469	2	-3.5353
C3orf80	0.10078	0.17122	0.969469	2	-3.4641
NEK4	0.069357	0.12069	0.969469	2	-3.4206
LTA4H	0.039345	0.071086	0.953186	2	-3.3936
PLEKHN1	0.059254	0.10434	0.969469	2	-3.3608
CLRN3	0.056315	0.09947	0.969469	2	-3.3503
NALCN	0.09627	0.16419	0.969469	2	-3.3007
hsa-let-7b	0.07507	0.12984	0.969469	2	-3.2988
SULT1E1	0.073477	0.12729	0.969469	2	-3.2936
DPP7	0.052655	0.093362	0.969469	2	-3.2903
RNPS1	0.08368	0.14366	0.969469	2	-3.2189
SUCLG1	0.071686	0.12439	0.969469	2	-3.2043
RNLS	0.054129	0.095877	0.969469	2	-3.1935
hsa-mir-4509-2	0.12664	0.21108	0.97378	2	-3.1908
ANKRD20A1	0.0708	0.12299	0.969469	2	-3.1726
NMRK1	0.12751	0.21963	0.97378	2	-3.1659
TMEM59	0.06	0.10545	0.969469	2	-3.1516
FASN	0.061606	0.10805	0.969469	2	-3.1214
hsa-mir-516a-1	0.087726	0.15036	0.969469	2	-3.0913
IRS1	0.13877	0.2345	0.97378	2	-3.0849
hsa-mir-568	0.077124	0.13308	0.969469	2	-3.0743
ZNF493	0.093567	0.15973	0.969469	2	-2.9975
EPB41L4A	0.088436	0.1515	0.969469	2	-2.9674
C8orf31	0.074852	0.12953	0.969469	2	-2.9455
RSG1	0.11014	0.18561	0.97378	2	-2.937
RCL1	0.082361	0.14154	0.969469	2	-2.9296
IFT46	0.062666	0.10985	0.969469	2	-2.9186
CLNS1A	0.10469	0.17723	0.969469	2	-2.8973
GLB1L2	0.079804	0.13743	0.969469	2	-2.8966
NEGR1	0.085691	0.14701	0.969469	2	-2.8747
ZNF76	0.072973	0.12653	0.969469	2	-2.8569
LOC100996331	0.076204	0.13162	0.969469	2	-2.8324
POTEB2	0.076204	0.13162	0.969469	2	-2.8324
POTEB	0.076204	0.13162	0.969469	2	-2.8324
LOC100287399	0.076204	0.13162	0.969469	2	-2.8324
MPHOSPH6	0.071544	0.12417	0.969469	2	-2.7852
C9orf47	0.099094	0.16857	0.969469	2	-2.7818
GPR160	0.10392	0.17602	0.969469	2	-2.6609
ANKRD29	0.11818	0.19802	0.97378	2	-2.642
NMBR	0.075216	0.13003	0.969469	2	-2.578
ANKRD20A3	0.17472	0.28076	0.97378	2	-2.546
ANKRD20A4	0.17472	0.28076	0.97378	2	-2.546
ANKRD20A2	0.17472	0.28076	0.97378	2	-2.546
IMP4	0.075874	0.13109	0.969469	2	-2.4859
PMP22	0.11401	0.19163	0.97378	2	-2.452
UGT3A2	0.12121	0.20263	0.97378	2	-2.4329
TMEM185B	0.087647	0.15023	0.969469	2	-2.4242
hsa-mir-4453	0.078756	0.13578	0.969469	2	-2.3677
GOLGA2	0.080105	0.13788	0.969469	2	-2.2614
hsa-mir-409	0.11455	0.19247	0.97378	2	-2.2511
LRRN4CL	0.10886	0.18373	0.97378	2	-2.2206
NUP50	0.095037	0.16222	0.969469	2	-2.0553
MIEN1	0.11045	0.18606	0.97378	2	-1.9902
SPDYE2L	0.42737	0.57542	0.992794	2	-1.89
SPDYE6	0.42737	0.57542	0.992794	2	-1.89
SPDYE2	0.42737	0.57542	0.992794	2	-1.89
SPDYE2B	0.42737	0.57542	0.992794	2	-1.89
TAOK2	0.098927	0.1683	0.969469	2	-1.4781
OR2C1	0.12447	0.20772	0.97378	2	-1.4053
hsa-mir-3976	0.11307	0.19017	0.97378	2	-1.1595
PPP2R5B	6.6454e-05	6.6108e-05	0.430693	1	-10.895
ATF7IP	0.00019936	0.0001968	0.641089	1	-10.764
TNKS2	0.00046518	0.00047795	0.929821	1	-10.433
CCDC137	0.00073099	0.0007515	0.929821	1	-10.119
KRTAP20-3	0.0012626	0.0012393	0.929821	1	-9.8098
CHRM3	0.0020601	0.0020828	0.929821	1	-9.5183
OR4X2	0.002193	0.0022332	0.929821	1	-9.504
IL23A	0.0023259	0.0023685	0.929821	1	-9.4875
FOXP2	0.0049841	0.004914	0.929821	1	-9.396
USP9X	0.0056486	0.0055827	0.929821	1	-9.2556
C1RL	0.0059144	0.0058319	0.929821	1	-9.2022
MYLK4	0.0063131	0.0062559	0.929821	1	-9.1422
AIFM3	0.0065789	0.0065204	0.929821	1	-9.1082
BCL11B	0.0069777	0.0068927	0.929821	1	-9.0636
MORF4L1	0.0072435	0.0071298	0.929821	1	-9.0546
KSR2	0.0075093	0.0073866	0.929821	1	-9.0068
AK8	0.0076422	0.0075067	0.929821	1	-9.0003
PRR9	0.0085726	0.0083911	0.929821	1	-8.9118
CANT1	0.0091042	0.0089261	0.929821	1	-8.8766
CNTF	0.0095029	0.0093455	0.929821	1	-8.8242
BPIFA3	0.0096358	0.009496	0.929821	1	-8.8143
TBC1D13	0.010566	0.010414	0.929821	1	-8.7221
FAM189A1	0.011762	0.011592	0.929821	1	-8.6245
RAB15	0.012959	0.012807	0.929821	1	-8.5319
C2orf68	0.01349	0.013339	0.929821	1	-8.5127
FCGR2B	0.013889	0.013722	0.929821	1	-8.4994
CYB561D1	0.014288	0.014116	0.929821	1	-8.487
WTH3DI	0.014421	0.014233	0.929821	1	-8.4765
ENPP3	0.014553	0.014361	0.929821	1	-8.4755
SCARF1	0.015218	0.015101	0.929821	1	-8.4555
KLHL40	0.015484	0.01537	0.929821	1	-8.4491
TMEM198	0.01575	0.015634	0.929821	1	-8.447
MYO10	0.016148	0.016011	0.929821	1	-8.4309
hsa-mir-1299	0.016547	0.016449	0.929821	1	-8.408
ASB18	0.020667	0.020678	0.929821	1	-8.3222
AGPHD1	0.0208	0.020795	0.929821	1	-8.3175
SERPINF1	0.021996	0.022023	0.929821	1	-8.2785
TNNI3	0.025186	0.025208	0.929821	1	-8.2084
TTC1	0.025718	0.025724	0.929821	1	-8.2021
LAMTOR3	0.026648	0.026713	0.929821	1	-8.1766
MYBPHL	0.02811	0.028154	0.929821	1	-8.152
TRPM2	0.028309	0.028347	0.929821	1	-8.148
hsa-mir-1204	0.028309	0.028347	0.929821	1	-8.148
ABCA1	0.029306	0.029331	0.929821	1	-8.1322
COPS3	0.029971	0.030008	0.929821	1	-8.1229
GUF1	0.030237	0.030268	0.929821	1	-8.1162
SMARCA4	0.031167	0.031261	0.929821	1	-8.0932
DDX3Y	0.035819	0.035953	0.929821	1	-8.029
hsa-mir-95	0.041268	0.041355	0.95048	1	-8.0046
AP2A2	0.043262	0.04341	0.95048	1	-7.9649
NSA2	0.044591	0.044714	0.95048	1	-7.9499
MALL	0.047382	0.047478	0.95048	1	-7.9164
ME3	0.050704	0.050875	0.953186	1	-7.8662
hsa-mir-5690	0.052166	0.052273	0.953186	1	-7.8453
MUC22	0.053894	0.054	0.953186	1	-7.8323
NMNAT1	0.056021	0.056051	0.953186	1	-7.8191
HMGCS2	0.056419	0.05648	0.953186	1	-7.8158
hsa-mir-4705	0.0624	0.062309	0.953186	1	-7.7568
RPAP3	0.06466	0.064597	0.953186	1	-7.736
PLA2G4E	0.066388	0.066391	0.953186	1	-7.7166
BEX2	0.067318	0.067239	0.953186	1	-7.7095
C2orf71	0.070109	0.069993	0.953186	1	-7.6916
FAM50A	0.071239	0.071125	0.953186	1	-7.6844
OGFOD1	0.071239	0.071125	0.953186	1	-7.6844
C9orf173	0.071704	0.071584	0.953186	1	-7.6808
SPIN2A	0.073166	0.073037	0.953186	1	-7.6662
NUDT5	0.07383	0.073642	0.953186	1	-7.6588
NEDD9	0.074761	0.074564	0.953186	1	-7.6533
AEN	0.076887	0.076738	0.953186	1	-7.6272
CA8	0.085128	0.084908	0.961831	1	-7.5676
CPN1	0.085792	0.085541	0.962506	1	-7.5636
SERTAD1	0.093368	0.093111	0.969469	1	-7.5095
LRRC14B	0.098684	0.098348	0.969469	1	-7.4722
TNK2	0.099349	0.099018	0.969469	1	-7.4638
hsa-mir-3131	0.103	0.10259	0.969469	1	-7.4447
hsa-mir-183	0.10347	0.10305	0.969469	1	-7.4404
FARS2	0.1036	0.1032	0.969469	1	-7.4383
RHAG	0.10732	0.1069	0.969469	1	-7.4057
SHC1	0.10852	0.10815	0.969469	1	-7.3969
CAND2	0.11011	0.10973	0.969469	1	-7.3924
C16orf86	0.11091	0.11053	0.969469	1	-7.3858
PLA2G4C	0.11623	0.11577	0.969469	1	-7.3565
KCND2	0.11703	0.11655	0.969469	1	-7.3474
DZIP1L	0.11829	0.11779	0.969469	1	-7.3359
NFAT5	0.11875	0.11823	0.969469	1	-7.3336
SRI	0.12314	0.12271	0.969469	1	-7.3009
SNX7	0.12473	0.1243	0.969469	1	-7.2891
PCBP3	0.12527	0.12481	0.969469	1	-7.2795
TOMM20L	0.13018	0.12974	0.969469	1	-7.2407
MS4A12	0.1359	0.13549	0.969469	1	-7.1906
THUMPD1	0.13616	0.13575	0.969469	1	-7.1854
ERAS	0.13696	0.13652	0.969469	1	-7.1803
C17orf80	0.13736	0.13692	0.969469	1	-7.1777
CMPK1	0.13909	0.13878	0.969469	1	-7.1648
LMAN2L	0.14068	0.14035	0.969469	1	-7.1465
IGDCC3	0.14215	0.14184	0.969469	1	-7.1307
CBR4	0.14308	0.14279	0.969469	1	-7.1254
ZNF99	0.14779	0.14754	0.969469	1	-7.0957
ARMC12	0.14779	0.14754	0.969469	1	-7.0957
GPHA2	0.14972	0.14947	0.969469	1	-7.0765
TMEM30B	0.00059809	0.00062385	0.929821	1	-7.0738
VCX	0.15311	0.15281	0.969469	1	-7.0487
VCY1B	0.15311	0.15281	0.969469	1	-7.0487
VCY	0.15311	0.15281	0.969469	1	-7.0487
VCX2	0.15311	0.15281	0.969469	1	-7.0487
ACSF2	0.16009	0.15976	0.969469	1	-6.9971
SYCN	0.16421	0.16378	0.969469	1	-6.9587
NT5M	0.16726	0.16688	0.969469	1	-6.9285
CNBP	0.1682	0.16786	0.969469	1	-6.9223
CLDN9	0.16959	0.16923	0.969469	1	-6.91
SPON2	0.17471	0.17433	0.969469	1	-6.8596
MAP1LC3C	0.17963	0.17922	0.970334	1	-6.7973
SPINK5	0.18102	0.18059	0.972363	1	-6.7906
AKTIP	0.18627	0.18571	0.97378	1	-6.7497
hsa-mir-4716	0.1868	0.18626	0.97378	1	-6.7358
ANKDD1B	0.18727	0.18675	0.97378	1	-6.7323
POLM	0.18966	0.18922	0.97378	1	-6.7147
OR6B2	0.18966	0.18922	0.97378	1	-6.7147
NPPC	0.19012	0.18968	0.97378	1	-6.704
ZCCHC5	0.19066	0.19017	0.97378	1	-6.6968
ARHGEF12	0.19385	0.19332	0.97378	1	-6.6715
C9orf66	0.19544	0.19484	0.97378	1	-6.6568
RNF123	0.19611	0.19553	0.97378	1	-6.6494
MYO1G	0.1965	0.19591	0.97378	1	-6.6419
AASDHPPT	0.0013955	0.0013837	0.929821	1	-6.6312
ZBTB1	0.19743	0.19684	0.97378	1	-6.6307
TSR2	0.19757	0.19697	0.97378	1	-6.6269
CDKL5	0.19863	0.19798	0.97378	1	-6.6156
AHCYL1	0.0015284	0.0014977	0.929821	1	-6.6125
TBC1D31	0.20023	0.19955	0.97378	1	-6.5965
ZFP36	0.20195	0.20127	0.97378	1	-6.5732
GSG1	0.20395	0.20325	0.97378	1	-6.5376
STK19	0.0016614	0.0016299	0.929821	1	-6.5316
OTP	0.20488	0.2042	0.97378	1	-6.5295
PCDHB10	0.20594	0.20522	0.97378	1	-6.5174
TMEM134	0.20754	0.20683	0.97378	1	-6.5051
RALGAPA2	0.209	0.20818	0.97378	1	-6.4886
FGF21	0.0017943	0.0017728	0.929821	1	-6.4798
MLH3	0.21093	0.21011	0.97378	1	-6.4593
NF2	0.21093	0.21011	0.97378	1	-6.4593
GPR133	0.0019272	0.0019338	0.929821	1	-6.4511
ZNF781	0.21578	0.21493	0.97378	1	-6.4207
KRT13	0.21624	0.21539	0.97378	1	-6.4164
KRTAP10-3	0.21624	0.21539	0.97378	1	-6.4164
TPD52L2	0.21843	0.21766	0.97378	1	-6.3944
hsa-mir-4803	0.21963	0.21878	0.97378	1	-6.3721
2024-09-07	0.22096	0.22012	0.97378	1	-6.3494
MRGPRX1	0.22136	0.22057	0.97378	1	-6.3448
NDUFV3	0.22229	0.22153	0.97378	1	-6.3218
MAP7D1	0.22362	0.22285	0.97378	1	-6.2935
CIZ1	0.22415	0.22335	0.97378	1	-6.2888
DAB2	0.22535	0.22455	0.97378	1	-6.2551
hsa-mir-3529	0.22621	0.22542	0.97378	1	-6.2354
ZSCAN23	0.22694	0.22617	0.97378	1	-6.2255
CCNB1IP1	0.2284	0.22767	0.97378	1	-6.2004
ALYREF	0.2296	0.22884	0.97378	1	-6.1902
CDKN3	0.23033	0.22959	0.97378	1	-6.1748
hsa-mir-6868	0.23033	0.22959	0.97378	1	-6.1748
SIPA1L3	0.23093	0.23023	0.97378	1	-6.1645
SNAPC3	0.0053828	0.0053289	0.929821	1	-6.1605
C2orf88	0.23166	0.23095	0.97378	1	-6.1541
IL32	0.23166	0.23095	0.97378	1	-6.1541
GPR32	0.23226	0.23155	0.97378	1	-6.1383
GATM	0.23339	0.23272	0.97378	1	-6.1277
PCID2	0.23339	0.23272	0.97378	1	-6.1277
GARS	0.23365	0.23296	0.97378	1	-6.1224
SDCCAG3	0.23365	0.23296	0.97378	1	-6.1224
AHCY	0.23438	0.23368	0.97378	1	-6.1116
RNF169	0.23538	0.23466	0.97378	1	-6.0899
ERI3	0.23538	0.23466	0.97378	1	-6.0899
HMOX2	0.0055157	0.0054566	0.929821	1	-6.0891
NOP10	0.23638	0.23571	0.97378	1	-6.0844
hsa-mir-1178	0.23711	0.23644	0.97378	1	-6.0789
OR7G1	0.23711	0.23644	0.97378	1	-6.0789
BEST2	0.0057815	0.0057119	0.929821	1	-6.0774
ANO8	0.23923	0.23866	0.97378	1	-6.0399
hsa-mir-3189	0.23923	0.23866	0.97378	1	-6.0399
ZWINT	0.23997	0.2394	0.97378	1	-6.0342
FLI1	0.24056	0.24001	0.97378	1	-6.0228
SLC41A1	0.24056	0.24001	0.97378	1	-6.0228
EIF4G2	0.24116	0.24063	0.97378	1	-6.0113
GPRC5D	0.24163	0.24106	0.97378	1	-5.9997
P2RX3	0.24163	0.24106	0.97378	1	-5.9997
DYDC2	0.24222	0.24163	0.97378	1	-5.9938
FBLN1	0.0061802	0.0060956	0.929821	1	-5.9855
RGPD2	0.24296	0.24234	0.97378	1	-5.9762
RGPD1	0.24296	0.24234	0.97378	1	-5.9762
RANBP2	0.24296	0.24234	0.97378	1	-5.9762
ALDH2	0.24369	0.24309	0.97378	1	-5.9703
EFNA5	0.24435	0.2438	0.97378	1	-5.9583
VWA5B2	0.0067119	0.0066389	0.929821	1	-5.9429
CASP8AP2	0.24528	0.24472	0.97378	1	-5.9403
GNG11	0.0068448	0.0067574	0.929821	1	-5.9349
OSBPL10	0.24728	0.24677	0.97378	1	-5.9096
CCDC140	0.0071106	0.0070204	0.929821	1	-5.8725
CLCA4	0.24847	0.24792	0.97378	1	-5.872
ZNF425	0.2492	0.24862	0.97378	1	-5.8592
CD38	0.2492	0.24862	0.97378	1	-5.8592
ITGA2	0.24967	0.24906	0.97378	1	-5.8528
hsa-mir-576	0.0080409	0.0079246	0.929821	1	-5.8345
FLNA	0.25086	0.25028	0.97378	1	-5.8333
F2RL3	0.007908	0.0077726	0.929821	1	-5.8302
RABEP1	0.0084397	0.0082863	0.929821	1	-5.8036
EXOC8	0.25179	0.25123	0.97378	1	-5.8003
ALS2CR12	0.25219	0.25162	0.97378	1	-5.7936
MAP2K3	0.25272	0.25213	0.97378	1	-5.7801
INHA	0.25272	0.25213	0.97378	1	-5.7801
PRKCZ	0.25272	0.25213	0.97378	1	-5.7801
SF3B2	0.0087055	0.0085218	0.929821	1	-5.773
KTI12	0.25352	0.25287	0.97378	1	-5.7665
ACSBG2	0.0081738	0.0080416	0.929821	1	-5.7616
SLC38A2	0.0089713	0.008803	0.929821	1	-5.7543
ACYP1	0.0088384	0.0086586	0.929821	1	-5.7289
hsa-mir-5681a	0.25591	0.25527	0.97378	1	-5.7035
hsa-mir-5681b	0.25591	0.25527	0.97378	1	-5.7035
HOXA1	0.25591	0.25527	0.97378	1	-5.7035
KCNE3	0.25645	0.25581	0.97378	1	-5.6964
PLAGL2	0.0097687	0.009651	0.929821	1	-5.6802
FAM117B	0.25724	0.25666	0.97378	1	-5.6747
AP5S1	0.25764	0.25713	0.97378	1	-5.6673
GLYATL1	0.0099016	0.0097878	0.929821	1	-5.6642
HTR2B	0.25857	0.2581	0.97378	1	-5.6452
PPP4R1	0.25871	0.25823	0.97378	1	-5.6377
DDX41	0.25937	0.25889	0.97378	1	-5.6151
NAA35	0.25964	0.25917	0.97378	1	-5.6075
PSG8	0.010699	0.010542	0.929821	1	-5.5936
NFRKB	0.025487	0.046687	0.95048	1	-5.5808
KCNK7	0.010832	0.010656	0.929821	1	-5.5796
FMR1	0.2599	0.25944	0.97378	1	-5.5766
PRB2	0.26043	0.25997	0.97378	1	-5.5688
CACNA1G	0.010965	0.010792	0.929821	1	-5.5675
hsa-mir-3187	0.26123	0.26077	0.97378	1	-5.5609
AP1M2	0.011364	0.011148	0.929821	1	-5.5373
OR4C45	0.26289	0.26244	0.97378	1	-5.529
SPATA6	0.011098	0.010909	0.929821	1	-5.5158
KRTAP4-5	0.011497	0.011309	0.929821	1	-5.5148
POLR2C	0.011629	0.011443	0.929821	1	-5.4993
LYAR	0.011895	0.011713	0.929821	1	-5.4971
DRAXIN	0.26376	0.26331	0.97378	1	-5.4964
hsa-mir-346	0.26402	0.26358	0.97378	1	-5.4881
FERMT1	0.26449	0.26404	0.97378	1	-5.4798
TKTL2	0.26535	0.265	0.97378	1	-5.463
PHLDB2	0.012294	0.012131	0.929821	1	-5.4621
PLTP	0.012427	0.012271	0.929821	1	-5.4611
MBL2	0.26562	0.26526	0.97378	1	-5.4545
IFT140	0.26695	0.26657	0.97378	1	-5.4374
OR52N1	0.26734	0.26697	0.97378	1	-5.4288
TACC1	0.26814	0.26779	0.97378	1	-5.4027
MTR	0.013357	0.013207	0.929821	1	-5.3999
LYN	0.26841	0.26804	0.97378	1	-5.3938
GLT1D1	0.013623	0.013446	0.929821	1	-5.3825
hsa-mir-5694	0.013756	0.013576	0.929821	1	-5.3823
NR2E3	0.014155	0.013972	0.929821	1	-5.3773
hsa-mir-376a-1	0.26914	0.26879	0.97378	1	-5.376
SORBS3	0.012161	0.011975	0.929821	1	-5.3671
hsa-mir-548x-2	0.2698	0.26943	0.97378	1	-5.367
CRTAM	0.2704	0.27	0.97378	1	-5.3488
A2ML1	0.0103	0.010172	0.929821	1	-5.3456
FAM133B	0.015351	0.015225	0.929821	1	-5.3375
PTPN3	0.016015	0.015874	0.929821	1	-5.3219
RHOXF1	0.2712	0.27082	0.97378	1	-5.3212
hsa-mir-3120	0.014886	0.014736	0.929821	1	-5.321
hsa-mir-214	0.014886	0.014736	0.929821	1	-5.321
UBE2QL1	0.015085	0.014947	0.929821	1	-5.3198
HMGN3	0.27153	0.27115	0.97378	1	-5.3118
MMADHC	0.27153	0.27115	0.97378	1	-5.3118
PLCXD2	0.016281	0.016127	0.929821	1	-5.3061
CLASRP	0.27186	0.27149	0.97378	1	-5.3024
ASB1	0.272	0.27163	0.97378	1	-5.2929
MAML1	0.016946	0.016874	0.929821	1	-5.2835
hsa-mir-302f	0.017344	0.017297	0.929821	1	-5.2762
RNF215	0.01668	0.016599	0.929821	1	-5.2609
S100A7	0.018275	0.018187	0.929821	1	-5.2525
MED28	0.018806	0.0188	0.929821	1	-5.24
RAB26	0.019072	0.019104	0.929821	1	-5.239
CCDC42	0.019737	0.019783	0.929821	1	-5.2308
ZC3H3	0.018408	0.018335	0.929821	1	-5.2206
AHCTF1	0.018674	0.018636	0.929821	1	-5.2168
TXNDC12	0.27472	0.2744	0.97378	1	-5.2149
DUSP28	0.27472	0.2744	0.97378	1	-5.2149
CLCA1	0.019471	0.019499	0.929821	1	-5.2105
CDK5RAP1	0.27519	0.27487	0.97378	1	-5.2048
ZNF304	0.021066	0.021066	0.929821	1	-5.1999
IL9R_X	0.018009	0.017943	0.929821	1	-5.1828
IL9R_Y	0.018009	0.017943	0.929821	1	-5.1828
MAP2K2	0.020401	0.020446	0.929821	1	-5.1701
ZNF395	0.02173	0.021733	0.929821	1	-5.1692
PNMA2	0.021863	0.021874	0.929821	1	-5.166
MCF2L2	0.018939	0.018971	0.929821	1	-5.1575
RNF126	0.017212	0.017168	0.929821	1	-5.151
hsa-mir-5096	0.27745	0.27707	0.97378	1	-5.1429
KIAA1429	0.024256	0.024239	0.929821	1	-5.1355
COX11	0.016813	0.01675	0.929821	1	-5.1215
DEFB132	0.023724	0.023692	0.929821	1	-5.1196
SLC25A23	0.023325	0.02333	0.929821	1	-5.1188
MICU2	0.02399	0.023971	0.929821	1	-5.1185
DEFB133	0.27851	0.27812	0.97378	1	-5.1001
AGA	0.27904	0.27861	0.97378	1	-5.0892
C2orf82	0.024654	0.024579	0.929821	1	-5.071
STAMBP	0.020933	0.020927	0.929821	1	-5.0633
CNDP2	0.026781	0.026825	0.929821	1	-5.0627
CYP4B1	0.02492	0.024912	0.929821	1	-5.0624
KIAA0753	0.025984	0.025986	0.929821	1	-5.0592
ZNF687	0.026515	0.026561	0.929821	1	-5.058
SURF1	0.28083	0.28037	0.97378	1	-5.056
HTT	0.028509	0.028538	0.929821	1	-5.0492
SLC9A9	0.020268	0.020322	0.929821	1	-5.0491
KRT85	0.028642	0.02866	0.929821	1	-5.0482
CHST11	0.065478	0.11444	0.969469	1	-5.0467
HAVCR1	0.027047	0.0271	0.929821	1	-5.0463
CXCL9	0.027977	0.028002	0.929821	1	-5.0445
SCIN	0.028907	0.028897	0.929821	1	-5.0428
GNPAT	0.029173	0.029219	0.929821	1	-5.037
ZFP69B	0.28163	0.28111	0.97378	1	-5.0335
CYP4F22	0.28163	0.28111	0.97378	1	-5.0335
hsa-mir-4297	0.02904	0.029073	0.929821	1	-5.0306
PLAC8	0.029838	0.02988	0.929821	1	-5.0288
ERN1	0.029705	0.029751	0.929821	1	-5.0085
NLRP10	0.030502	0.030553	0.929821	1	-5.0066
NKAP	0.018541	0.018493	0.929821	1	-5.0046
hsa-mir-4674	0.2827	0.2821	0.97378	1	-4.9989
IQCC	0.2827	0.2821	0.97378	1	-4.9989
SST	0.28329	0.28269	0.97378	1	-4.9872
ERCC6L	0.015617	0.015496	0.929821	1	-4.9771
TMED8	0.28363	0.28303	0.97378	1	-4.9755
IBTK	0.15741	0.23286	0.97378	1	-4.975
MTUS2	0.010472	0.019598	0.929821	1	-4.9715
PPP1R17	0.017477	0.017421	0.929821	1	-4.9684
ASH1L	0.03223	0.032359	0.929821	1	-4.9654
RNF168	0.028775	0.028766	0.929821	1	-4.9589
OCRL	0.027844	0.027863	0.929821	1	-4.9576
ARHGAP24	0.030635	0.030702	0.929821	1	-4.9448
ETNK1	0.033958	0.034071	0.929821	1	-4.9446
CPA4	0.034755	0.034921	0.929821	1	-4.9444
CBX1	0.029572	0.029599	0.929821	1	-4.9417
OVGP1	0.28482	0.2842	0.97378	1	-4.9395
hsa-mir-4664	0.28482	0.2842	0.97378	1	-4.9395
OR5B2	0.035553	0.035737	0.929821	1	-4.9337
TXNDC16	0.28549	0.28493	0.97378	1	-4.9273
CTHRC1	0.28549	0.28493	0.97378	1	-4.9273
CTAGE6	0.035354	0.035552	0.929821	1	-4.9232
CTAGE15	0.035354	0.035552	0.929821	1	-4.9232
NAGA	0.032097	0.032207	0.929821	1	-4.9182
ERCC6	0.036816	0.036963	0.929821	1	-4.9169
CSB-PGBD3	0.036816	0.036963	0.929821	1	-4.9169
PDYN	0.033825	0.033945	0.929821	1	-4.9153
CCDC101	0.28595	0.28536	0.97378	1	-4.915
TDG	0.037945	0.038137	0.929821	1	-4.9126
PCDHGB3	0.03954	0.039676	0.929821	1	-4.9097
PCDHGA10	0.03954	0.039676	0.929821	1	-4.9097
PCDHGB5	0.03954	0.039676	0.929821	1	-4.9097
PCDHGC3	0.03954	0.039676	0.929821	1	-4.9097
PCDHGB4	0.03954	0.039676	0.929821	1	-4.9097
PCDHGB6	0.03954	0.039676	0.929821	1	-4.9097
PCDHGA1	0.03954	0.039676	0.929821	1	-4.9097
PCDHGA6	0.03954	0.039676	0.929821	1	-4.9097
PCDHGA2	0.03954	0.039676	0.929821	1	-4.9097
PCDHGA5	0.03954	0.039676	0.929821	1	-4.9097
PCDHGB2	0.03954	0.039676	0.929821	1	-4.9097
PCDHGA12	0.03954	0.039676	0.929821	1	-4.9097
PCDHGB1	0.03954	0.039676	0.929821	1	-4.9097
PCDHGB7	0.03954	0.039676	0.929821	1	-4.9097
PCDHGC5	0.03954	0.039676	0.929821	1	-4.9097
PCDHGA9	0.03954	0.039676	0.929821	1	-4.9097
PCDHGA8	0.03954	0.039676	0.929821	1	-4.9097
PCDHGC4	0.03954	0.039676	0.929821	1	-4.9097
PCDHGA7	0.03954	0.039676	0.929821	1	-4.9097
TMEM51	0.036085	0.036217	0.929821	1	-4.9044
TMEM144	0.28721	0.28665	0.97378	1	-4.9026
NCK1	0.28721	0.28665	0.97378	1	-4.9026
OR10C1	0.032895	0.033032	0.929821	1	-4.901
CUL2	0.033559	0.033696	0.929821	1	-4.8844
SIPA1L1	0.04273	0.04288	0.95048	1	-4.883
FAM174A	0.017743	0.017678	0.929821	1	-4.8798
hsa-mir-125a	0.021332	0.021321	0.929821	1	-4.8772
SEC31A	0.016414	0.016291	0.929821	1	-4.8767
QRFPR	0.031566	0.031676	0.929821	1	-4.8767
KIF15	0.043793	0.043915	0.95048	1	-4.8742
FAM154A	0.031831	0.031938	0.929821	1	-4.8733
USP32	0.042464	0.042612	0.95048	1	-4.8674
FAM19A2	0.28868	0.28816	0.97378	1	-4.8648
FAT4	0.037148	0.037333	0.929821	1	-4.8643
EME2	0.042863	0.043026	0.95048	1	-4.8638
hsa-mir-3916	0.042996	0.043158	0.95048	1	-4.863
BTBD11	0.024389	0.024348	0.929821	1	-4.8603
OR5AC2	0.014686	0.014516	0.929821	1	-4.8521
hsa-mir-4784	0.28947	0.28893	0.97378	1	-4.8519
CLDN15	0.036616	0.036813	0.929821	1	-4.8417
UNC5CL	0.041534	0.041627	0.95048	1	-4.8409
ATF2	0.037547	0.037719	0.929821	1	-4.8396
ROPN1	0.043394	0.043565	0.95048	1	-4.838
hsa-mir-146a	0.03449	0.034628	0.929821	1	-4.8369
FOXN2	0.021465	0.021446	0.929821	1	-4.8325
MSMB	0.035021	0.035205	0.929821	1	-4.8312
ARHGAP1	0.025452	0.025496	0.929821	1	-4.8284
MBP	0.019205	0.01924	0.929821	1	-4.8281
CLU	0.044458	0.044595	0.95048	1	-4.8263
CLPSL2	0.35866	0.38327	0.97378	1	-4.8262
ZNF618	0.2902	0.2896	0.97378	1	-4.8259
CCL8	0.044724	0.044857	0.95048	1	-4.8247
SNF8	0.024123	0.024093	0.929821	1	-4.8234
CXCL11	0.020003	0.020044	0.929821	1	-4.8219
IRX1	0.042597	0.042738	0.95048	1	-4.8211
VTN	0.048711	0.048904	0.953186	1	-4.8192
hsa-mir-3167	0.047249	0.047351	0.95048	1	-4.8171
ITPR3	0.047913	0.048065	0.951804	1	-4.8105
hsa-mir-7515	0.048312	0.048466	0.953186	1	-4.8074
SLC44A5	0.020534	0.020541	0.929821	1	-4.8072
CCT3	0.044059	0.044153	0.95048	1	-4.806
DPF3	0.044192	0.044311	0.95048	1	-4.8049
CRLF2_X	0.027512	0.027512	0.929821	1	-4.8048
CRLF2_Y	0.027512	0.027512	0.929821	1	-4.8048
SAMD4B	0.034091	0.034228	0.929821	1	-4.8033
CTDNEP1	0.044989	0.045153	0.95048	1	-4.7997
PDZD3	0.024522	0.024455	0.929821	1	-4.7871
CD320	0.037679	0.03786	0.929821	1	-4.7869
RNF7	0.025585	0.025588	0.929821	1	-4.7843
DIS3L2	0.049641	0.049878	0.953186	1	-4.7833
GPR156	0.046318	0.04645	0.95048	1	-4.7826
AQPEP	0.046584	0.046709	0.95048	1	-4.7783
SEMA4D	0.03635	0.036503	0.929821	1	-4.7724
GTF2H4	0.045122	0.045293	0.95048	1	-4.7658
OR4D9	0.046983	0.047088	0.95048	1	-4.7655
hsa-mir-6876	0.052964	0.053103	0.953186	1	-4.7603
SULT2A1	0.026382	0.026433	0.929821	1	-4.7601
RYR2	0.024787	0.024751	0.929821	1	-4.7597
CERCAM	0.053628	0.053755	0.953186	1	-4.7574
LRRC56	0.054027	0.054123	0.953186	1	-4.7529
TMEM207	0.054957	0.054987	0.953186	1	-4.7491
TCTN2	0.042198	0.042304	0.95048	1	-4.7485
SRGAP1	0.053097	0.053231	0.953186	1	-4.7464
CCDC90B	0.037414	0.037588	0.929821	1	-4.7421
LUZP2	0.14737	0.22576	0.97378	1	-4.7376
JSRP1	0.043926	0.044035	0.95048	1	-4.7361
GLA	0.034357	0.034485	0.929821	1	-4.7348
PCBP4	0.054293	0.054346	0.953186	1	-4.732
PLA2G5	0.29313	0.2924	0.97378	1	-4.7309
WDR81	0.030369	0.030413	0.929821	1	-4.7257
hsa-mir-548a-3	0.058014	0.058045	0.953186	1	-4.7223
ARPC3	0.043129	0.043279	0.95048	1	-4.7156
OR4K17	0.057881	0.057937	0.953186	1	-4.7121
MMEL1	0.046451	0.046597	0.95048	1	-4.7097
ETNK2	0.041135	0.041217	0.95048	1	-4.7071
CC2D1A	0.019338	0.019367	0.929821	1	-4.7068
TEC	0.16252	0.23647	0.97378	1	-4.705
hsa-mir-4436b-2	0.026116	0.026117	0.929821	1	-4.705
APITD1	0.29386	0.29318	0.97378	1	-4.7026
APITD1-CORT	0.29386	0.29318	0.97378	1	-4.7026
LRRC30	0.055356	0.055373	0.953186	1	-4.7024
PIH1D2	0.045388	0.045574	0.95048	1	-4.7011
EXOSC6	0.046186	0.046307	0.95048	1	-4.7009
CCND1	0.054692	0.054726	0.953186	1	-4.6945
ALDH3A1	0.061603	0.061548	0.953186	1	-4.6894
AQP10	0.050439	0.050623	0.953186	1	-4.6889
TP53I3	0.055888	0.055916	0.953186	1	-4.6881
METTL7B	0.037015	0.037194	0.929821	1	-4.6864
hsa-mir-4435-2	0.015883	0.015754	0.929821	1	-4.6851
PLGRKT	0.061071	0.061063	0.953186	1	-4.6817
hsa-mir-5701-1	0.29519	0.2946	0.97378	1	-4.6737
hsa-mir-5701-2	0.29519	0.2946	0.97378	1	-4.6737
GSG1L	0.047648	0.047747	0.95048	1	-4.6725
DENND2D	0.057749	0.057794	0.953186	1	-4.672
FOXD4L3	0.062068	0.061963	0.953186	1	-4.6714
FOXD4L6	0.062068	0.061963	0.953186	1	-4.6714
ZNF441	0.060141	0.06016	0.953186	1	-4.6693
SLC5A1	0.048179	0.048317	0.953186	1	-4.6667
MBLAC1	0.034888	0.035082	0.929821	1	-4.6633
MSRB1	0.032629	0.032778	0.929821	1	-4.6624
BTG4	0.29579	0.29519	0.97378	1	-4.6591
VTA1	0.29579	0.29519	0.97378	1	-4.6591
FAHD2B	0.058546	0.058556	0.953186	1	-4.6558
HSD17B14	0.059875	0.059893	0.953186	1	-4.6506
ZBP1	0.29685	0.29624	0.97378	1	-4.6442
STK4	0.29685	0.29624	0.97378	1	-4.6442
TENM3	0.29685	0.29624	0.97378	1	-4.6442
CUL4B	0.051901	0.052031	0.953186	1	-4.6433
TNPO1	0.063729	0.063638	0.953186	1	-4.641
VPS45	0.067584	0.067481	0.953186	1	-4.637
ZDHHC8	0.065191	0.065125	0.953186	1	-4.6333
FAM13A	0.055223	0.055253	0.953186	1	-4.6323
GOLPH3L	0.069245	0.069151	0.953186	1	-4.629
LAMA2	0.034623	0.034774	0.929821	1	-4.6263
PDPN	0.045521	0.045712	0.95048	1	-4.625
HCRTR1	0.06559	0.065545	0.953186	1	-4.6246
CDCA5	0.031433	0.03153	0.929821	1	-4.6244
ZBTB17	0.048844	0.049056	0.953186	1	-4.6237
USP9Y	0.012851	0.024125	0.929821	1	-4.6178
TALDO1	0.056287	0.056332	0.953186	1	-4.6162
ZNF578	0.045787	0.045925	0.95048	1	-4.6155
RCBTB1	0.031034	0.031116	0.929821	1	-4.6143
CST9L	0.29751	0.29693	0.97378	1	-4.6142
CHRND	0.071837	0.071706	0.953186	1	-4.6094
BAG1	0.069577	0.069485	0.953186	1	-4.6079
hsa-mir-1208	0.072368	0.072235	0.953186	1	-4.6067
MYH14	0.06878	0.068721	0.953186	1	-4.606
SLC25A3	0.29798	0.29736	0.97378	1	-4.5989
CHDC2	0.29798	0.29736	0.97378	1	-4.5989
CRTAC1	0.070641	0.070536	0.953186	1	-4.5962
ENPP6	0.071438	0.071315	0.953186	1	-4.596
LIMCH1	0.071571	0.071441	0.953186	1	-4.5908
PPM1G	0.073299	0.073137	0.953186	1	-4.5877
CSNK2A3	0.046717	0.046839	0.95048	1	-4.5854
PSMB4	0.065989	0.065979	0.953186	1	-4.5839
TLDC1	0.059211	0.059209	0.953186	1	-4.5835
C2orf72	0.05828	0.058297	0.953186	1	-4.5811
S100A4	0.072103	0.071964	0.953186	1	-4.5796
hsa-mir-592	0.074362	0.074178	0.953186	1	-4.578
TIRAP	0.049508	0.049722	0.953186	1	-4.5773
EPHB1	0.027711	0.027727	0.929821	1	-4.5672
GP2	0.048578	0.048741	0.953186	1	-4.5637
hsa-mir-181c	0.073963	0.073779	0.953186	1	-4.5636
FMN2	0.063065	0.062932	0.953186	1	-4.5592
BRMS1L	0.30024	0.2997	0.97378	1	-4.552
ZSCAN2	0.30024	0.2997	0.97378	1	-4.552
FKBP10	0.038078	0.038254	0.929821	1	-4.5517
BTBD3	0.036483	0.036685	0.929821	1	-4.5514
H2BFM	0.054825	0.054851	0.953186	1	-4.5512
MXD4	0.056818	0.056834	0.953186	1	-4.5502
CCNA2	0.063464	0.063378	0.953186	1	-4.5494
BMP2K	0.060805	0.060806	0.953186	1	-4.5421
hsa-mir-6774	0.021199	0.021189	0.929821	1	-4.5373
C20orf141	0.06147	0.061445	0.953186	1	-4.537
TMPRSS5	0.051236	0.051357	0.953186	1	-4.5357
BEGAIN	0.077286	0.077145	0.953186	1	-4.534
AGR3	0.074495	0.074305	0.953186	1	-4.5316
hsa-mir-4687	0.047515	0.047624	0.95048	1	-4.5295
hsa-mir-6081	0.023192	0.023189	0.929821	1	-4.5274
hsa-mir-3166	0.068514	0.068429	0.953186	1	-4.5261
POLR2E	0.066786	0.066764	0.953186	1	-4.5197
TNFRSF8	0.075027	0.074817	0.953186	1	-4.5192
hsa-mir-3939	0.079147	0.079052	0.953186	1	-4.517
ITGA9	0.047116	0.047219	0.95048	1	-4.5155
NOP14	0.084064	0.083886	0.956977	1	-4.5145
C1QTNF5	0.073565	0.073393	0.953186	1	-4.5105
hsa-mir-328	0.078881	0.078815	0.953186	1	-4.5094
BCR	0.050837	0.050997	0.953186	1	-4.5084
PDGFD	0.08526	0.085037	0.961831	1	-4.5057
CYTL1	0.063596	0.063515	0.953186	1	-4.5054
SNAPC1	0.3017	0.30115	0.97378	1	-4.5036
REM1	0.3017	0.30115	0.97378	1	-4.5036
hsa-mir-4526	0.031964	0.032076	0.929821	1	-4.5032
hsa-mir-8074	0.070242	0.070122	0.953186	1	-4.5007
SLC25A22	0.05416	0.054249	0.953186	1	-4.4988
PSMB3	0.069843	0.069726	0.953186	1	-4.4945
MKRN1	0.079944	0.079861	0.953186	1	-4.4945
hsa-mir-6840	0.068381	0.068305	0.953186	1	-4.4937
PDP1	0.083799	0.083607	0.955611	1	-4.4913
hsa-mir-30c-2	0.037812	0.038006	0.929821	1	-4.489
hsa-mir-665	0.30263	0.30208	0.97378	1	-4.4871
MAPK4	0.30263	0.30208	0.97378	1	-4.4871
NDUFA13	0.081406	0.081274	0.953887	1	-4.4766
MYH7	0.064793	0.06472	0.953186	1	-4.4757
RTKN2	0.061204	0.061195	0.953186	1	-4.4748
MLF2	0.044856	0.045015	0.95048	1	-4.4743
TAX1BP3	0.3033	0.30271	0.97378	1	-4.4704
FIBP	0.3033	0.30271	0.97378	1	-4.4704
EFCAB2	0.082337	0.082178	0.95408	1	-4.4661
OPRM1	0.06054	0.060551	0.953186	1	-4.4636
PF4V1	0.041002	0.041073	0.95048	1	-4.4616
FARP1	0.037281	0.037468	0.929821	1	-4.4611
GJB2	0.087786	0.087471	0.962506	1	-4.4591
FKBP3	0.05097	0.051124	0.953186	1	-4.4567
SRGAP3	0.058812	0.058828	0.953186	1	-4.4559
AP1G2	0.057084	0.057136	0.953186	1	-4.4551
TSPO	0.30376	0.30318	0.97378	1	-4.4535
hsa-mir-4648	0.30376	0.30318	0.97378	1	-4.4535
SAC3D1	0.30376	0.30318	0.97378	1	-4.4535
TFAP2C	0.062533	0.062432	0.953186	1	-4.452
UBE3D	0.072767	0.072665	0.953186	1	-4.4517
FZD3	0.081273	0.081125	0.953887	1	-4.4499
URGCP	0.084662	0.084435	0.958352	1	-4.4492
URGCP-MRPS24	0.084662	0.084435	0.958352	1	-4.4492
EMC8	0.071039	0.070949	0.953186	1	-4.4491
POPDC3	0.08114	0.081003	0.953887	1	-4.4429
IZUMO3	0.06785	0.06777	0.953186	1	-4.4377
PIGV	0.094032	0.093796	0.969469	1	-4.4339
SDR42E1	0.096691	0.096424	0.969469	1	-4.4305
ELL	0.093235	0.092977	0.969469	1	-4.4295
ATP5G1	0.097488	0.097178	0.969469	1	-4.4275
RBAK	0.051502	0.051642	0.953186	1	-4.4262
RBAK-RBAKDN	0.051502	0.051642	0.953186	1	-4.4262
POGK	0.097089	0.096792	0.969469	1	-4.4241
OR4K14	0.081938	0.081795	0.953887	1	-4.4233
hsa-mir-516b-2	0.091441	0.091195	0.969469	1	-4.4211
hsa-mir-516b-1	0.091441	0.091195	0.969469	1	-4.4211
hsa-mir-6761	0.048977	0.049199	0.953186	1	-4.4204
OR9Q2	0.09483	0.094587	0.969469	1	-4.42
KRTAP9-4	0.094298	0.094055	0.969469	1	-4.4151
HTR1D	0.098817	0.098485	0.969469	1	-4.4145
ERAP1	0.049774	0.050018	0.953186	1	-4.4131
hsa-mir-564	0.083001	0.082824	0.955611	1	-4.4112
FAM180B	0.096558	0.096286	0.969469	1	-4.4112
GNB1L	0.056552	0.056591	0.953186	1	-4.4109
CNTNAP5	0.099216	0.098865	0.969469	1	-4.4098
PTGER4	0.059742	0.059773	0.953186	1	-4.4096
DZIP1	0.060274	0.060281	0.953186	1	-4.4076
SLC22A5	0.3783	0.399	0.97378	1	-4.407
MYO1D	0.068647	0.068566	0.953186	1	-4.4064
RNF152	0.091108	0.090871	0.969469	1	-4.4044
WDR7	0.078615	0.078555	0.953186	1	-4.403
MROH8	0.094963	0.094727	0.969469	1	-4.403
GABARAPL2	0.070774	0.070685	0.953186	1	-4.4029
POLA1	0.096956	0.096649	0.969469	1	-4.4009
C7orf55	0.04911	0.049342	0.953186	1	-4.3989
AGPS	0.086855	0.08656	0.962506	1	-4.394
TWISTNB	0.056685	0.056697	0.953186	1	-4.3927
CYP4Z1	0.023857	0.023824	0.929821	1	-4.3926
APH1A	0.10121	0.10082	0.969469	1	-4.3915
IZUMO2	0.05004	0.050275	0.953186	1	-4.3887
TDRD10	0.056951	0.056992	0.953186	1	-4.3855
COL16A1	0.10028	0.09996	0.969469	1	-4.3836
DUSP7	0.089912	0.089594	0.964776	1	-4.3795
FAM3A	0.091906	0.091669	0.969469	1	-4.3781
CLCN4	0.0729	0.072786	0.953186	1	-4.3752
PDCD1	0.099747	0.099451	0.969469	1	-4.375
CMTM7	0.033426	0.033532	0.929821	1	-4.3749
hsa-mir-4321	0.076489	0.076315	0.953186	1	-4.3728
hsa-mir-6128	0.085659	0.085397	0.962506	1	-4.3708
NBPF3	0.086988	0.086683	0.962506	1	-4.3703
hsa-mir-19b-2	0.09988	0.099582	0.969469	1	-4.3702
MRPS22	0.07197	0.071817	0.953186	1	-4.3691
hsa-mir-1255a	0.088849	0.088522	0.962506	1	-4.369
KIF20B	0.070508	0.070403	0.953186	1	-4.3682
hsa-mir-6894	0.30695	0.30639	0.97378	1	-4.3659
LURAP1L	0.30695	0.30639	0.97378	1	-4.3659
SLC26A8	0.077951	0.077882	0.953186	1	-4.3657
TMEM43	0.063995	0.063907	0.953186	1	-4.3608
OCIAD2	0.079545	0.0795	0.953186	1	-4.3596
APOBEC4	0.062799	0.06266	0.953186	1	-4.3593
BCL2L2	0.092438	0.092186	0.969469	1	-4.3589
SRC	0.080476	0.080362	0.953186	1	-4.3547
LIPK	0.088716	0.088403	0.962506	1	-4.3543
hsa-mir-650	0.098285	0.097941	0.969469	1	-4.3487
hsa-mir-7107	0.067451	0.067358	0.953186	1	-4.3484
SPATA12	0.073432	0.07326	0.953186	1	-4.3478
TBC1D3F	0.30762	0.30704	0.97378	1	-4.3477
CPVL	0.30762	0.30704	0.97378	1	-4.3477
PLSCR4	0.30762	0.30704	0.97378	1	-4.3477
COMMD2	0.10467	0.10424	0.969469	1	-4.3465
FOXD3	0.062666	0.062542	0.953186	1	-4.3457
TAPBPL	0.088052	0.087753	0.962506	1	-4.3446
USP1	0.10134	0.10097	0.969469	1	-4.3446
CELSR1	0.059609	0.059632	0.953186	1	-4.344
OR2A5	0.1048	0.10437	0.969469	1	-4.3438
HIST2H2AC	0.10201	0.10161	0.969469	1	-4.3429
CRHBP	0.02718	0.027228	0.929821	1	-4.3421
GPR65	0.10985	0.10947	0.969469	1	-4.3421
HINFP	0.099083	0.098734	0.969469	1	-4.3404
GALC	0.093102	0.092839	0.969469	1	-4.3392
PTPRB	0.10613	0.10572	0.969469	1	-4.3337
SERPINA9	0.11144	0.11105	0.969469	1	-4.3294
SEMA4A	0.30941	0.30878	0.97378	1	-4.3293
RPL21	0.30941	0.30878	0.97378	1	-4.3293
COQ3	0.30941	0.30878	0.97378	1	-4.3293
HELLS	0.11171	0.11131	0.969469	1	-4.3277
LOC440335	0.083267	0.083085	0.955611	1	-4.3251
DPPA3	0.10241	0.102	0.969469	1	-4.3235
FAM65B	0.090045	0.089746	0.964776	1	-4.3191
CHID1	0.095893	0.09562	0.969469	1	-4.3189
ANKRD13B	0.092836	0.092562	0.969469	1	-4.318
hsa-mir-6784	0.069046	0.068943	0.953186	1	-4.3158
FBXL4	0.072501	0.07237	0.953186	1	-4.3156
RAB19	0.087653	0.087371	0.962506	1	-4.3149
OVOL3	0.072634	0.072517	0.953186	1	-4.3148
hsa-mir-624	0.053363	0.053492	0.953186	1	-4.313
CATSPER2	0.31027	0.30969	0.97378	1	-4.3106
LOC388849	0.056154	0.056188	0.953186	1	-4.3104
STAT6	0.058945	0.058954	0.953186	1	-4.3088
SDCBP2	0.081007	0.08088	0.953887	1	-4.3084
hsa-mir-1282	0.087919	0.087607	0.962506	1	-4.3068
ACTB	0.096026	0.095752	0.969469	1	-4.3035
HOXA3	0.095362	0.095096	0.969469	1	-4.2989
EMC2	0.10785	0.10746	0.969469	1	-4.2987
ADIRF	0.087387	0.087088	0.962506	1	-4.2981
BAMBI	0.073033	0.0729	0.953186	1	-4.2957
hsa-mir-6770-3	0.09802	0.097646	0.969469	1	-4.295
hsa-mir-6770-2	0.09802	0.097646	0.969469	1	-4.295
hsa-mir-6770-1	0.09802	0.097646	0.969469	1	-4.295
ANXA9	0.082469	0.082301	0.95408	1	-4.2928
HPCAL4	0.31127	0.31071	0.97378	1	-4.2917
EIF2A	0.31127	0.31071	0.97378	1	-4.2917
CFHR3	0.0313	0.031386	0.929821	1	-4.2903
LOC100130370	0.11237	0.11196	0.969469	1	-4.2901
ZNF580	0.083134	0.08297	0.955611	1	-4.2896
DCDC1	0.068913	0.068812	0.953186	1	-4.2872
UNC45B	0.069444	0.069373	0.953186	1	-4.2866
PDE9A	0.085526	0.085294	0.962506	1	-4.2853
SPANXN2	0.075292	0.075057	0.953186	1	-4.2844
VMAC	0.094431	0.094195	0.969469	1	-4.2825
FBXW5	0.04592	0.046053	0.95048	1	-4.2824
EIF2B5	0.11543	0.11494	0.969469	1	-4.2812
GSG2	0.10174	0.10134	0.969469	1	-4.2809
NAPSA	0.078349	0.078292	0.953186	1	-4.2802
KCNK17	0.077818	0.07776	0.953186	1	-4.2781
BMP4	0.077419	0.077308	0.953186	1	-4.2752
ZNF235	0.31174	0.3112	0.97378	1	-4.2726
CUBN	0.31174	0.3112	0.97378	1	-4.2726
TIE1	0.31174	0.3112	0.97378	1	-4.2726
APBB2	0.054426	0.054458	0.953186	1	-4.2723
NDUFA6	0.087121	0.086829	0.962506	1	-4.2716
ALS2	0.098418	0.098064	0.969469	1	-4.2716
SLC25A35	0.066986	0.06694	0.953186	1	-4.271
RANGRF	0.066986	0.06694	0.953186	1	-4.271
PRAMEF16	0.072236	0.072104	0.953186	1	-4.2689
CCDC170	0.054559	0.0546	0.953186	1	-4.265
UBE2D2	0.090843	0.090611	0.969346	1	-4.2643
FOXJ3	0.12247	0.12201	0.969469	1	-4.2629
TUBB1	0.0834	0.083219	0.955611	1	-4.2611
ABHD16B	0.061736	0.061671	0.953186	1	-4.2597
CSNK1G1	0.052565	0.052683	0.953186	1	-4.2544
SLC39A5	0.075159	0.074938	0.953186	1	-4.254
ZBTB3	0.074229	0.074048	0.953186	1	-4.2538
CDK8	0.31213	0.31158	0.97378	1	-4.2532
SNAPC4	0.12115	0.12063	0.969469	1	-4.2485
ZNF318	0.11995	0.1195	0.969469	1	-4.2475
ZNF775	0.051103	0.051243	0.953186	1	-4.2427
XYLB	0.080609	0.080469	0.953186	1	-4.2398
ARHGEF1	0.11902	0.11851	0.969469	1	-4.2394
RGS2	0.11596	0.1155	0.969469	1	-4.2376
KIF2C	0.086191	0.0859	0.962506	1	-4.2368
TXN2	0.125	0.12454	0.969469	1	-4.236
GPATCH8	0.31313	0.31261	0.97378	1	-4.2335
AKAP7	0.31313	0.31261	0.97378	1	-4.2335
LRIT1	0.052033	0.052158	0.953186	1	-4.2328
OR4A47	0.066122	0.066124	0.953186	1	-4.2321
XIAP	0.079413	0.079352	0.953186	1	-4.232
hsa-mir-6808	0.1254	0.12495	0.969469	1	-4.2318
SPTLC2	0.10506	0.10462	0.969469	1	-4.2306
FCF1	0.055489	0.055515	0.953186	1	-4.2284
C14orf1	0.11742	0.11696	0.969469	1	-4.2261
ANKRD34B	0.11184	0.11146	0.969469	1	-4.2259
B4GALT1	0.070375	0.070248	0.953186	1	-4.2258
FXYD3	0.10972	0.10933	0.969469	1	-4.2256
SOGA2	0.1149	0.11445	0.969469	1	-4.2252
ADIPOR2	0.10573	0.10534	0.969469	1	-4.2247
IFNA13	0.11058	0.11016	0.969469	1	-4.2229
IFNA1	0.11058	0.11016	0.969469	1	-4.2229
FAM203A	0.31426	0.31378	0.97378	1	-4.2136
NACA2	0.31426	0.31378	0.97378	1	-4.2136
GDF3	0.31426	0.31378	0.97378	1	-4.2136
GRASP	0.077153	0.07702	0.953186	1	-4.2133
RBM6	0.095627	0.095362	0.969469	1	-4.2121
USP3	0.10998	0.1096	0.969469	1	-4.2117
NME1	0.12673	0.12636	0.969469	1	-4.2084
MRPL32	0.082204	0.082051	0.95408	1	-4.2077
HIST1H2BL	0.1246	0.12414	0.969469	1	-4.2069
TPPP2	0.055755	0.055778	0.953186	1	-4.2008
SPEG	0.061337	0.061306	0.953186	1	-4.1968
MRPL49	0.12341	0.12297	0.969469	1	-4.1954
FMNL1	0.31546	0.31501	0.97378	1	-4.1934
TGFB1	0.31546	0.31501	0.97378	1	-4.1934
SCARF2	0.31546	0.31501	0.97378	1	-4.1934
GGCT	0.10041	0.10009	0.969469	1	-4.1928
GPR27	0.1056	0.10522	0.969469	1	-4.1908
UBXN6	0.094697	0.094455	0.969469	1	-4.1889
OR8U1	0.076289	0.076102	0.953186	1	-4.1884
OR8U8	0.076289	0.076102	0.953186	1	-4.1884
CDK15	0.1161	0.11562	0.969469	1	-4.1874
KRTAP10-5	0.47272	0.47973	0.992794	1	-4.1865
ZNF672	0.089248	0.088944	0.962506	1	-4.1864
LPIN1	0.063198	0.063083	0.953186	1	-4.1863
C9orf116	0.13111	0.1307	0.969469	1	-4.1846
NLRP1	0.097222	0.096926	0.969469	1	-4.1823
SNX21	0.11516	0.11469	0.969469	1	-4.1821
TMEM42	0.08752	0.087225	0.962506	1	-4.1815
MAPRE2	0.08021	0.080102	0.953186	1	-4.1796
PPP2R2A	0.10639	0.10596	0.969469	1	-4.1785
ORC4	0.12726	0.12686	0.969469	1	-4.1749
SMIM20	0.12407	0.12364	0.969469	1	-4.1745
hsa-mir-6890	0.31619	0.31577	0.97378	1	-4.1729
NAT14	0.31619	0.31577	0.97378	1	-4.1729
hsa-mir-1912	0.13271	0.13232	0.969469	1	-4.1712
NAV2	0.10879	0.10841	0.969469	1	-4.1706
CCNI2	0.10187	0.10147	0.969469	1	-4.1697
RGPD8	0.42688	0.43953	0.97378	1	-4.1676
RGPD5	0.42688	0.43953	0.97378	1	-4.1676
RGPD6	0.42688	0.43953	0.97378	1	-4.1676
OLFML2A	0.10015	0.09983	0.969469	1	-4.1676
SLC9A5	0.091773	0.091535	0.969469	1	-4.1657
EEF1A2	0.13364	0.13318	0.969469	1	-4.1656
PDE6H	0.11915	0.11867	0.969469	1	-4.1655
CTU1	0.07702	0.07688	0.953186	1	-4.1651
NAA38	0.12487	0.12443	0.969469	1	-4.165
PROM2	0.089646	0.08936	0.963879	1	-4.1627
SEC16A	0.11078	0.11038	0.969469	1	-4.1618
CCDC148	0.081805	0.081666	0.953887	1	-4.1615
OR4A16	0.10666	0.10623	0.969469	1	-4.1603
TERT	0.11782	0.11736	0.969469	1	-4.1595
SUSD5	0.10413	0.10369	0.969469	1	-4.1582
VPS13C	0.10427	0.10382	0.969469	1	-4.158
CYP27C1	0.043527	0.043665	0.95048	1	-4.1571
SHOX_Y	0.12799	0.12755	0.969469	1	-4.1563
SHOX_X	0.12799	0.12755	0.969469	1	-4.1563
LDHD	0.097754	0.097386	0.969469	1	-4.1562
ISYNA1	0.13484	0.13438	0.969469	1	-4.1549
STK17A	0.081539	0.081414	0.953887	1	-4.1539
ACAP2	0.11264	0.11224	0.969469	1	-4.1521
NCDN	0.31685	0.31641	0.97378	1	-4.1521
SNX13	0.12048	0.11999	0.969469	1	-4.1519
COL6A1	0.075957	0.075744	0.953186	1	-4.1499
TEX261	0.088583	0.088283	0.962506	1	-4.1492
ANKZF1	0.088184	0.08788	0.962506	1	-4.1474
PHOSPHO2-KLHL23	0.10925	0.10889	0.969469	1	-4.1466
KLHL23	0.10925	0.10889	0.969469	1	-4.1466
RABGEF1	0.11796	0.1175	0.969469	1	-4.1461
SPAG11A	0.077618	0.077525	0.953186	1	-4.1459
C12orf54	0.11689	0.11641	0.969469	1	-4.1435
C6orf106	0.1367	0.13625	0.969469	1	-4.1431
PTPN2	0.13151	0.13111	0.969469	1	-4.1421
RIMS4	0.10759	0.10718	0.969469	1	-4.142
SIGLEC6	0.13178	0.13138	0.969469	1	-4.1409
SLC35D3	0.078083	0.07802	0.953186	1	-4.1404
PREX2	0.13404	0.13359	0.969469	1	-4.1403
GJA5	0.13191	0.13151	0.969469	1	-4.1396
TMEM61	0.10054	0.1002	0.969469	1	-4.1394
B4GALNT1	0.093634	0.09338	0.969469	1	-4.1388
PALM	0.1044	0.10397	0.969469	1	-4.1374
EIF4G1	0.058679	0.0587	0.953186	1	-4.1336
FTSJ3	0.08659	0.086303	0.962506	1	-4.133
AICDA	0.12739	0.12699	0.969469	1	-4.1319
ZNF584	0.11849	0.11798	0.969469	1	-4.1316
NPR2	0.31745	0.31698	0.97378	1	-4.131
C10orf12	0.31745	0.31698	0.97378	1	-4.131
SLC25A10	0.10719	0.10677	0.969469	1	-4.1294
ARPC4	0.13756	0.13712	0.969469	1	-4.1291
ARPC4-TTLL3	0.13756	0.13712	0.969469	1	-4.1291
MYBPC1	0.13351	0.13303	0.969469	1	-4.1284
OXT	0.086324	0.086046	0.962506	1	-4.1263
SAMD14	0.10945	0.10907	0.969469	1	-4.125
MCTP1	0.10653	0.10609	0.969469	1	-4.1246
PARP2	0.09895	0.098611	0.969469	1	-4.1211
ATP4B	0.097355	0.097065	0.969469	1	-4.1208
TRIM5	0.064261	0.064165	0.953186	1	-4.1193
hsa-mir-1184-2	0.12135	0.12081	0.969469	1	-4.116
hsa-mir-1184-1	0.12135	0.12081	0.969469	1	-4.116
CSE1L	0.084197	0.08402	0.956977	1	-4.1159
RGS5	0.064394	0.064297	0.953186	1	-4.1156
SLX4IP	0.065723	0.065698	0.953186	1	-4.1144
LNPEP	0.05509	0.055132	0.953186	1	-4.1143
DRD2	0.11131	0.11088	0.969469	1	-4.114
GUCY1B3	0.10453	0.10412	0.969469	1	-4.1124
NBEAL1	0.13922	0.13892	0.969469	1	-4.1109
RLIM	0.12779	0.12735	0.969469	1	-4.1107
KIAA0020	0.13444	0.13398	0.969469	1	-4.11
TRPV5	0.12301	0.12256	0.969469	1	-4.1096
AZI1	0.10825	0.10785	0.969469	1	-4.1074
hsa-mir-1915	0.14082	0.1405	0.969469	1	-4.1073
TAF1D	0.10081	0.10047	0.969469	1	-4.1062
SLAIN1	0.10373	0.10331	0.969469	1	-4.1057
SDF2L1	0.1343	0.13385	0.969469	1	-4.1043
hsa-mir-518d	0.1353	0.13489	0.969469	1	-4.1034
hsa-mir-519b	0.1353	0.13489	0.969469	1	-4.1034
hsa-mir-520g	0.1353	0.13489	0.969469	1	-4.1034
hsa-mir-520h	0.1353	0.13489	0.969469	1	-4.1034
DPY19L2	0.12394	0.12349	0.969469	1	-4.1026
LONRF1	0.12885	0.12843	0.969469	1	-4.1026
DSG2	0.13842	0.13805	0.969469	1	-4.1006
hsa-mir-6816	0.10905	0.10866	0.969469	1	-4.1005
EHBP1L1	0.12686	0.1265	0.969469	1	-4.0968
NKAIN2	0.073698	0.073526	0.953186	1	-4.096
SH3GLB1	0.078216	0.078157	0.953186	1	-4.0939
KIF1C	0.12221	0.12173	0.969469	1	-4.0938
ATP10D	0.10387	0.10345	0.969469	1	-4.0924
MAP2K7	0.11118	0.11076	0.969469	1	-4.0917
KCNQ1	0.11503	0.11456	0.969469	1	-4.0876
OR13H1	0.13882	0.1385	0.969469	1	-4.0858
SMIM1	0.14361	0.14332	0.969469	1	-4.0851
hsa-mir-2392	0.12606	0.12565	0.969469	1	-4.0847
PYHIN1	0.13603	0.13561	0.969469	1	-4.0847
ZNFX1	0.10892	0.10854	0.969469	1	-4.0827
ENAM	0.086457	0.086183	0.962506	1	-4.0823
ZNF35	0.058413	0.058414	0.953186	1	-4.0806
hsa-mir-4300	0.13032	0.12987	0.969469	1	-4.0806
DHODH	0.14427	0.14402	0.969469	1	-4.0798
DGKQ	0.14148	0.14121	0.969469	1	-4.0785
hsa-mir-924	0.11928	0.11879	0.969469	1	-4.0778
TMSB15B	0.12646	0.12606	0.969469	1	-4.0755
KLF11	0.13789	0.13744	0.969469	1	-4.0727
NAT8B	0.099482	0.099144	0.969469	1	-4.0716
hsa-mir-670	0.14587	0.14559	0.969469	1	-4.0703
ENDOD1	0.14028	0.13995	0.969469	1	-4.07
CCDC80	0.14334	0.14307	0.969469	1	-4.0682
KPNB1	0.13045	0.13002	0.969469	1	-4.068
CBY1	0.10227	0.10188	0.969469	1	-4.0672
2024-09-09	0.052432	0.052519	0.953186	1	-4.0669
GUCY2C	0.13896	0.13862	0.969469	1	-4.0644
FAM228B	0.14161	0.14133	0.969469	1	-4.0636
SOCS2	0.093767	0.093515	0.969469	1	-4.0599
CD1D	0.14121	0.14093	0.969469	1	-4.0588
ANAPC2	0.090444	0.090196	0.966495	1	-4.0584
NRD1	0.13457	0.13411	0.969469	1	-4.0556
PTCD2	0.10799	0.10759	0.969469	1	-4.0544
IL31	0.12899	0.12857	0.969469	1	-4.054
KRT38	0.10772	0.10733	0.969469	1	-4.0525
hsa-mir-5004	0.062932	0.062788	0.953186	1	-4.0524
NOXA1	0.079014	0.078921	0.953186	1	-4.052
RALA	0.070906	0.07083	0.953186	1	-4.0511
C8A	0.14254	0.14225	0.969469	1	-4.0496
MAPK10	0.12327	0.12284	0.969469	1	-4.0487
ADCY10	0.11437	0.1139	0.969469	1	-4.047
CARD8	0.14294	0.14265	0.969469	1	-4.047
USP17L15	0.31984	0.31947	0.97378	1	-4.0434
KCTD12	0.31984	0.31947	0.97378	1	-4.0434
LOC100129480	0.075492	0.075271	0.953186	1	-4.0418
C3orf83	0.075492	0.075271	0.953186	1	-4.0418
EFCC1	0.15065	0.15044	0.969469	1	-4.0414
FNBP1L	0.10679	0.10637	0.969469	1	-4.0394
SENP6	0.10958	0.10918	0.969469	1	-4.0382
GCOM1	0.065093	0.11388	0.969469	1	-4.0378
MYZAP	0.065093	0.11388	0.969469	1	-4.0378
URM1	0.14188	0.1416	0.969469	1	-4.0359
COL4A3BP	0.13377	0.13331	0.969469	1	-4.0357
SELM	0.12859	0.12814	0.969469	1	-4.0355
PDXP	0.15145	0.1512	0.969469	1	-4.0353
ASNA1	0.15092	0.15069	0.969469	1	-4.0349
H2AFY2	0.14613	0.14586	0.969469	1	-4.0302
OR2AE1	0.12035	0.11985	0.969469	1	-4.0293
KIAA1377	0.1472	0.14694	0.969469	1	-4.0285
GPR88	0.1153	0.11481	0.969469	1	-4.0281
ACTR1B	0.10094	0.10058	0.969469	1	-4.0277
RFWD3	0.11769	0.11723	0.969469	1	-4.025
GJA4	0.14999	0.14973	0.969469	1	-4.0245
hsa-mir-1225	0.13949	0.13917	0.969469	1	-4.0222
hsa-mir-548f-1	0.14706	0.1468	0.969469	1	-4.022
MALSU1	0.083666	0.083476	0.955611	1	-4.0212
DLGAP1	0.3215	0.32117	0.97378	1	-4.0206
PRPF6	0.3215	0.32117	0.97378	1	-4.0206
SLC19A2	0.3215	0.32117	0.97378	1	-4.0206
KCNJ10	0.3215	0.32117	0.97378	1	-4.0206
MFN1	0.3215	0.32117	0.97378	1	-4.0206
MPEG1	0.12832	0.12789	0.969469	1	-4.0203
GZMB	0.090178	0.089888	0.964776	1	-4.0202
ZNF347	0.08845	0.088129	0.962506	1	-4.0186
DIDO1	0.14799	0.14774	0.969469	1	-4.0165
TNFSF13B	0.11556	0.11509	0.969469	1	-4.0127
CPSF6	0.10108	0.1007	0.969469	1	-4.0123
ERP27	0.10626	0.10584	0.969469	1	-4.0122
ST8SIA1	0.12261	0.12214	0.969469	1	-4.0119
ACY3	0.15464	0.15435	0.969469	1	-4.0103
KYNU	0.15397	0.15367	0.969469	1	-4.009
SEMA5A	0.12447	0.12399	0.969469	1	-4.0075
GTF3A	0.089115	0.08881	0.962506	1	-4.0074
ENHO	0.13656	0.13612	0.969469	1	-4.0056
COL1A2	0.12846	0.128	0.969469	1	-4.0055
SYCE3	0.13125	0.13082	0.969469	1	-4.0025
DES	0.14946	0.14916	0.969469	1	-4.0017
FAM220A	0.13776	0.13732	0.969469	1	-4.0004
SCXA	0.14553	0.14526	0.969469	1	-4.0001
SCXB	0.14553	0.14526	0.969469	1	-4.0001
TXNDC11	0.14906	0.14879	0.969469	1	-3.9998
MYH9	0.10812	0.10772	0.969469	1	-3.9996
hsa-mir-4677	0.15557	0.15521	0.969469	1	-3.9996
CHUK	0.14985	0.14958	0.969469	1	-3.9993
GADD45B	0.15025	0.14999	0.969469	1	-3.9977
MLXIP	0.32257	0.32228	0.97378	1	-3.9975
CCDC33	0.15039	0.15014	0.969469	1	-3.9971
AKR1A1	0.12659	0.1262	0.969469	1	-3.9968
METTL21A	0.13072	0.1303	0.969469	1	-3.9968
TBX2	0.15198	0.15173	0.969469	1	-3.9967
EPS8	0.14746	0.14721	0.969469	1	-3.9926
TGM6	0.12287	0.12241	0.969469	1	-3.9911
BTN3A2	0.14932	0.14906	0.969469	1	-3.9909
hsa-mir-4666b	0.11955	0.11909	0.969469	1	-3.9902
HNRNPH1	0.12154	0.12101	0.969469	1	-3.9892
C18orf8	0.1464	0.1461	0.969469	1	-3.9892
ATG4C	0.1561	0.1557	0.969469	1	-3.9892
hsa-mir-100	0.10533	0.10493	0.969469	1	-3.9888
KNG1	0.12274	0.12229	0.969469	1	-3.9794
GUCA1B	0.060847	0.10683	0.969469	1	-3.979
FAM154B	0.14347	0.1432	0.969469	1	-3.9779
FAM163B	0.15902	0.15866	0.969469	1	-3.9779
AQP8	0.15264	0.15237	0.969469	1	-3.9767
CYP4F11	0.15424	0.15397	0.969469	1	-3.9767
RIIAD1	0.32343	0.32319	0.97378	1	-3.974
PTGIR	0.11251	0.1121	0.969469	1	-3.9738
MXRA8	0.15743	0.15706	0.969469	1	-3.9738
FGF4	0.1569	0.15652	0.969469	1	-3.9724
PTDSS2	0.15995	0.15962	0.969469	1	-3.9695
C3orf55	0.10267	0.10227	0.969469	1	-3.9682
ZNF747	0.13989	0.13954	0.969469	1	-3.9665
ATP6V0C	0.14228	0.14197	0.969469	1	-3.9621
HLA-DRA	0.13417	0.1337	0.969469	1	-3.9613
hsa-mir-4742	0.14055	0.14022	0.969469	1	-3.9595
TSPAN15	0.1565	0.15611	0.969469	1	-3.9586
F3	0.11104	0.11063	0.969469	1	-3.9576
hsa-mir-548q	0.083533	0.083344	0.955611	1	-3.9572
PTPRE	0.10148	0.1011	0.969469	1	-3.9548
TUBB	0.11982	0.11939	0.969469	1	-3.9538
FAM171A2	0.092172	0.091936	0.969469	1	-3.9535
UBE2U	0.3243	0.3241	0.97378	1	-3.9501
TRAK1	0.3243	0.3241	0.97378	1	-3.9501
ANPEP	0.13204	0.13163	0.969469	1	-3.9498
ABTB2	0.15358	0.15327	0.969469	1	-3.9496
ZC3H13	0.16142	0.16099	0.969469	1	-3.9489
WNT7B	0.15371	0.15341	0.969469	1	-3.9487
ALKBH3	0.13802	0.13759	0.969469	1	-3.9481
ADRA2A	0.10546	0.10508	0.969469	1	-3.9478
CHRM4	0.12168	0.12114	0.969469	1	-3.9467
TSC22D1	0.14042	0.14008	0.969469	1	-3.9449
CA10	0.16341	0.163	0.969469	1	-3.9436
VPS51	0.13577	0.13537	0.969469	1	-3.9417
CCDC36	0.16381	0.16339	0.969469	1	-3.9396
hsa-mir-6776	0.11636	0.11589	0.969469	1	-3.939
hsa-mir-764	0.074096	0.073908	0.953186	1	-3.9382
hsa-mir-1202	0.12181	0.12128	0.969469	1	-3.9382
MGAM	0.104	0.10356	0.969469	1	-3.9378
MOV10L1	0.16354	0.16314	0.969469	1	-3.9365
PUM1	0.15251	0.15224	0.969469	1	-3.934
SIGLEC1	0.066653	0.066633	0.953186	1	-3.9339
DMKN	0.15716	0.1568	0.969469	1	-3.9334
BBIP1	0.13138	0.13097	0.969469	1	-3.9328
CTBP1	0.1242	0.12375	0.969469	1	-3.9322
hsa-mir-5094	0.16328	0.16287	0.969469	1	-3.9317
hsa-mir-4478	0.14387	0.14358	0.969469	1	-3.9264
hsa-mir-5698	0.13098	0.13056	0.969469	1	-3.9259
FXYD7	0.32529	0.32514	0.97378	1	-3.9258
MRGPRX3	0.32529	0.32514	0.97378	1	-3.9258
SLC51A	0.32529	0.32514	0.97378	1	-3.9258
TRAF3IP1	0.32529	0.32514	0.97378	1	-3.9258
ABHD14B	0.32529	0.32514	0.97378	1	-3.9258
GPR83	0.12208	0.12162	0.969469	1	-3.9256
PCSK9	0.13165	0.13126	0.969469	1	-3.9238
hsa-mir-365a	0.16035	0.16001	0.969469	1	-3.9237
TIMM44	0.10262	0.17409	0.969469	1	-3.9232
LRTM2	0.16474	0.16433	0.969469	1	-3.9229
CPOX	0.14201	0.14172	0.969469	1	-3.9227
GGPS1	0.16182	0.16138	0.969469	1	-3.9219
EFCAB4B	0.16407	0.16366	0.969469	1	-3.9206
UBE2D4	0.14839	0.14812	0.969469	1	-3.9175
AGBL2	0.12978	0.12934	0.969469	1	-3.9162
FAM159A	0.15437	0.1541	0.969469	1	-3.9144
NODAL	0.11463	0.11417	0.969469	1	-3.9122
ARV1	0.1339	0.13346	0.969469	1	-3.9102
SLC25A13	0.07928	0.079209	0.953186	1	-3.9082
OR1L8	0.14959	0.14932	0.969469	1	-3.9082
RBM22	0.10254	0.10215	0.969469	1	-3.9062
FAM3D	0.16235	0.16191	0.969469	1	-3.9061
ZSCAN21	0.16753	0.16715	0.969469	1	-3.905
OTOL1	0.15663	0.15624	0.969469	1	-3.904
OR8D2	0.32669	0.32652	0.97378	1	-3.9011
GNE	0.32669	0.32652	0.97378	1	-3.9011
NRM	0.32669	0.32652	0.97378	1	-3.9011
ARHGEF40	0.32669	0.32652	0.97378	1	-3.9011
VGLL2	0.32669	0.32652	0.97378	1	-3.9011
hsa-mir-6752	0.09257	0.092312	0.969469	1	-3.9
SH3BGRL	0.14653	0.14626	0.969469	1	-3.8976
PLA2G6	0.16886	0.16851	0.969469	1	-3.8974
U2AF2	0.16846	0.16814	0.969469	1	-3.8972
hsa-mir-4498	0.16102	0.16067	0.969469	1	-3.8967
TSNAX	0.1654	0.16498	0.969469	1	-3.8947
IRG1	0.12952	0.12911	0.969469	1	-3.89
ANGPTL6	0.12434	0.12387	0.969469	1	-3.8897
SLC27A3	0.13218	0.13177	0.969469	1	-3.8885
TMEM169	0.15052	0.1503	0.969469	1	-3.8876
PRRC2A	0.15477	0.15446	0.969469	1	-3.883
RGS11	0.13816	0.13776	0.969469	1	-3.8817
FA2H	0.16899	0.16864	0.969469	1	-3.8816
ISM2	0.17045	0.17003	0.969469	1	-3.8794
PPP1R7	0.16939	0.16905	0.969469	1	-3.8792
hsa-mir-19a	0.32815	0.32796	0.97378	1	-3.8759
FFAR1	0.15451	0.15422	0.969469	1	-3.8758
GATSL2	0.15012	0.14985	0.969469	1	-3.8757
NEUROD1	0.14826	0.14801	0.969469	1	-3.8749
ADSSL1	0.16554	0.16513	0.969469	1	-3.8746
FAM131B	0.17059	0.17017	0.969469	1	-3.8738
C8orf46	0.092703	0.092444	0.969469	1	-3.8722
CYP2A7	0.15158	0.15133	0.969469	1	-3.8715
KRAS	0.17072	0.1703	0.969469	1	-3.8715
NDUFAB1	0.12713	0.12674	0.969469	1	-3.8707
PPHLN1	0.16062	0.16028	0.969469	1	-3.8706
ASIC2	0.16567	0.16527	0.969469	1	-3.8702
LSM12	0.14241	0.14211	0.969469	1	-3.8701
KRTAP2-3	0.13962	0.13928	0.969469	1	-3.8686
RBMS3	0.12101	0.12051	0.969469	1	-3.868
ZNF517	0.17178	0.17136	0.969469	1	-3.8653
ZFYVE19	0.14002	0.13966	0.969469	1	-3.8612
ZNF737	0.13244	0.13206	0.969469	1	-3.8595
OR7C2	0.13975	0.13942	0.969469	1	-3.856
CAMTA1	0.17364	0.17327	0.969469	1	-3.8544
SPATA31D3	0.12586	0.12545	0.969469	1	-3.8537
SPATA31D4	0.12586	0.12545	0.969469	1	-3.8537
KIAA1143	0.12925	0.12883	0.969469	1	-3.8535
AP5M1	0.32961	0.32944	0.97378	1	-3.8503
CA12	0.32961	0.32944	0.97378	1	-3.8503
hsa-mir-3914-1	0.15936	0.15902	0.969469	1	-3.8499
STK32C	0.17351	0.17312	0.969469	1	-3.8485
TMEM55A	0.16594	0.16556	0.969469	1	-3.8473
JAKMIP2	0.17232	0.17193	0.969469	1	-3.8469
PRX	0.1157	0.11523	0.969469	1	-3.8462
FOXJ2	0.14175	0.14145	0.969469	1	-3.8456
FGF8	0.16049	0.16015	0.969469	1	-3.8447
LRRC72	0.1262	0.12578	0.969469	1	-3.8422
DYNC2H1	0.17205	0.17164	0.969469	1	-3.8421
ZNF75D	0.15916	0.1588	0.969469	1	-3.8403
GPR22	0.15982	0.15952	0.969469	1	-3.8373
FOXO1	0.17497	0.17458	0.969469	1	-3.8359
LDHC	0.13709	0.13664	0.969469	1	-3.8343
ZNF740	0.11829	0.11779	0.969469	1	-3.8336
NDNL2	0.17431	0.17394	0.969469	1	-3.8334
hsa-mir-5704	0.15504	0.15468	0.969469	1	-3.8333
DALRD3	0.13284	0.13246	0.969469	1	-3.8286
C1orf65	0.13258	0.1322	0.969469	1	-3.8285
SERPINA6	0.12513	0.12469	0.969469	1	-3.828
GFER	0.13563	0.13525	0.969469	1	-3.8277
hsa-mir-5680	0.33048	0.33027	0.97378	1	-3.8243
SLC6A16	0.14919	0.14891	0.969469	1	-3.821
hsa-mir-4781	0.16155	0.16111	0.969469	1	-3.8147
NDUFA5	0.14733	0.14707	0.969469	1	-3.8139
FAM167B	0.15132	0.15108	0.969469	1	-3.8124
HINT2	0.17776	0.17748	0.969469	1	-3.8118
SLC6A6	0.12008	0.11963	0.969469	1	-3.8045
FAAH2	0.47926	0.48541	0.992794	1	-3.8041
hsa-mir-4282	0.13935	0.13906	0.969469	1	-3.802
OR2B3	0.099615	0.099301	0.969469	1	-3.8018
NMNAT3	0.068115	0.068034	0.953186	1	-3.8009
hsa-mir-5191	0.17311	0.17275	0.969469	1	-3.8004
ADARB2	0.16301	0.16259	0.969469	1	-3.7992
TNRC6B	0.17325	0.17286	0.969469	1	-3.7988
QDPR	0.14866	0.14838	0.969469	1	-3.7986
RNF207	0.15823	0.15791	0.969469	1	-3.7986
COX16	0.13683	0.13638	0.969469	1	-3.798
hsa-mir-4439	0.33187	0.33162	0.97378	1	-3.7977
hsa-mir-569	0.33187	0.33162	0.97378	1	-3.7977
SS18L1	0.11676	0.11626	0.969469	1	-3.7963
GABRD	0.17657	0.17622	0.969469	1	-3.796
DYNLT3	0.17524	0.17486	0.969469	1	-3.7939
hsa-mir-217	0.17697	0.17665	0.969469	1	-3.7932
RNF20	0.15225	0.15196	0.969469	1	-3.7901
OR1C1	0.15703	0.15669	0.969469	1	-3.7893
LRRC70	0.15171	0.15145	0.969469	1	-3.7887
GRHPR	0.089381	0.089085	0.962506	1	-3.7876
ZNRF4	0.16687	0.16648	0.969469	1	-3.7852
hsa-mir-6866	0.17511	0.17471	0.969469	1	-3.7847
AHCYL2	0.18042	0.18001	0.971622	1	-3.7847
FOLR2	0.15783	0.1575	0.969469	1	-3.7836
MRPS11	0.15756	0.15722	0.969469	1	-3.7816
AK1	0.14095	0.14063	0.969469	1	-3.7782
TMEM233	0.17218	0.1718	0.969469	1	-3.7708
PLXNB1	0.15078	0.15055	0.969469	1	-3.7694
MAGEA6	0.17683	0.1765	0.969469	1	-3.7675
LHX4	0.17896	0.17861	0.969469	1	-3.7667
INPP5K	0.16514	0.16471	0.969469	1	-3.7657
AP3S2	0.16122	0.16082	0.969469	1	-3.7654
BIRC5	0.15876	0.15843	0.969469	1	-3.765
USP29	0.17869	0.17836	0.969469	1	-3.7649
INPPL1	0.17737	0.17707	0.969469	1	-3.7626
ALMS1	0.18202	0.18152	0.97378	1	-3.7615
C10orf62	0.16487	0.16448	0.969469	1	-3.7606
APTX	0.16368	0.16327	0.969469	1	-3.7599
EPHX1	0.16275	0.16231	0.969469	1	-3.7589
SGMS2	0.17989	0.17947	0.970334	1	-3.7549
SLC17A6	0.16288	0.16245	0.969469	1	-3.7448
PROX1	0.16314	0.16272	0.969469	1	-3.7432
WDR33	0.33466	0.3345	0.97378	1	-3.7432
SPHKAP	0.33466	0.3345	0.97378	1	-3.7432
CCT7	0.33466	0.3345	0.97378	1	-3.7432
CCDC177	0.16447	0.16406	0.969469	1	-3.7417
CPM	0.16022	0.15989	0.969469	1	-3.7383
ANKRD30B	0.17192	0.17151	0.969469	1	-3.7375
TMEM8C	0.15863	0.1583	0.969469	1	-3.7356
UNC93A	0.18029	0.17987	0.971622	1	-3.732
LSMEM2	0.18255	0.18207	0.97378	1	-3.732
SLC38A1	0.18082	0.1804	0.972119	1	-3.7288
CPLX4	0.18707	0.18654	0.97378	1	-3.7254
UVSSA	0.18694	0.18641	0.97378	1	-3.7206
HMG20A	0.1783	0.17799	0.969469	1	-3.72
MRC2	0.17404	0.17366	0.969469	1	-3.7173
CTXN3	0.16673	0.16637	0.969469	1	-3.7166
SHFM1	0.1876	0.18708	0.97378	1	-3.7162
MRPL47	0.27227	0.3164	0.97378	1	-3.716
ZIM2	0.16082	0.16048	0.969469	1	-3.7156
PEG3	0.16082	0.16048	0.969469	1	-3.7156
NUMB	0.33626	0.3361	0.97378	1	-3.7151
PRSS27	0.33626	0.3361	0.97378	1	-3.7151
ZDHHC5	0.33626	0.3361	0.97378	1	-3.7151
CCDC135	0.33626	0.3361	0.97378	1	-3.7151
SREBF1	0.33626	0.3361	0.97378	1	-3.7151
C2orf44	0.33626	0.3361	0.97378	1	-3.7151
CD177	0.14401	0.14372	0.969469	1	-3.7149
CENPV	0.14565	0.22452	0.97378	1	-3.7134
hsa-mir-6884	0.188	0.18746	0.97378	1	-3.7134
ABCF2	0.17617	0.17578	0.969469	1	-3.7127
NFU1	0.16833	0.168	0.969469	1	-3.7097
SEMG2	0.15185	0.15159	0.969469	1	-3.7087
C10orf76	0.12992	0.12947	0.969469	1	-3.7061
TBL1Y	0.15105	0.15082	0.969469	1	-3.7054
hsa-mir-6796	0.13297	0.13258	0.969469	1	-3.7048
H2AFX	0.18933	0.18888	0.97378	1	-3.7013
WWTR1	0.063679	0.11151	0.969469	1	-3.7012
CARKD	0.1775	0.17719	0.969469	1	-3.6997
DOCK3	0.17032	0.16989	0.969469	1	-3.698
ATP5B	0.17537	0.17498	0.969469	1	-3.6953
TAF1	0.17112	0.17069	0.969469	1	-3.6929
VCX3A	0.15311	0.15281	0.969469	1	-3.69
CENPC1	0.33805	0.33799	0.97378	1	-3.6864
ANKRD32	0.33805	0.33799	0.97378	1	-3.6864
ADCY8	0.33805	0.33799	0.97378	1	-3.6864
NLRP11	0.33805	0.33799	0.97378	1	-3.6864
LRRC48	0.19132	0.19084	0.97378	1	-3.6862
SETX	0.18547	0.1849	0.97378	1	-3.6855
ATP10B	0.16394	0.16353	0.969469	1	-3.6853
NR3C1	0.17444	0.17408	0.969469	1	-3.6851
OAF	0.18787	0.18733	0.97378	1	-3.6848
PPIL6	0.15956	0.15923	0.969469	1	-3.6819
BRAP	0.17923	0.17886	0.969469	1	-3.6817
ZNF222	0.17006	0.16964	0.969469	1	-3.6792
PGRMC1	0.18986	0.18943	0.97378	1	-3.6763
ADCK2	0.17338	0.173	0.969469	1	-3.6722
OR51B2	0.19331	0.19283	0.97378	1	-3.6722
MPI	0.17803	0.17774	0.969469	1	-3.672
RIC8A	0.17723	0.17692	0.969469	1	-3.6679
SLC25A47	0.17298	0.17263	0.969469	1	-3.6669
RPS17	0.16653	0.16616	0.969469	1	-3.6632
RPS17L	0.16653	0.16616	0.969469	1	-3.6632
TMEM44	0.17271	0.17235	0.969469	1	-3.6627
ASPA	0.18481	0.18425	0.97378	1	-3.6621
EIF4E1B	0.19398	0.19345	0.97378	1	-3.662
TNFRSF12A	0.19358	0.19309	0.97378	1	-3.661
ATHL1	0.33918	0.33908	0.97378	1	-3.6572
SKAP1	0.33918	0.33908	0.97378	1	-3.6572
POPDC2	0.1771	0.17679	0.969469	1	-3.6567
ZDHHC9	0.19079	0.19031	0.97378	1	-3.6554
FBXO18	0.19584	0.19524	0.97378	1	-3.6536
GPC1	0.1557	0.15535	0.969469	1	-3.6525
STAT2	0.17391	0.17351	0.969469	1	-3.6494
MCOLN2	0.18919	0.18874	0.97378	1	-3.648
WDFY2	0.19518	0.19456	0.97378	1	-3.6459
hsa-mir-6165	0.167	0.16661	0.969469	1	-3.6451
MCF2L	0.1779	0.17762	0.969469	1	-3.642
GLIPR1	0.15384	0.15354	0.969469	1	-3.6407
POLR2J2	0.19491	0.19432	0.97378	1	-3.6394
POLR2J3	0.19491	0.19432	0.97378	1	-3.6394
POLR2J	0.19491	0.19432	0.97378	1	-3.6394
hsa-mir-7852	0.19677	0.19618	0.97378	1	-3.639
PDCD5	0.17152	0.17109	0.969469	1	-3.6375
HIPK1	0.17976	0.17936	0.970334	1	-3.6365
COQ6	0.17763	0.17734	0.969469	1	-3.6357
WFDC10B	0.15803	0.1577	0.969469	1	-3.6356
WFDC13	0.15803	0.1577	0.969469	1	-3.6356
ASTL	0.18667	0.18613	0.97378	1	-3.6337
RAB9A	0.18441	0.18384	0.97378	1	-3.6325
LETM2	0.19039	0.18992	0.97378	1	-3.6321
GUCY2F	0.19531	0.1947	0.97378	1	-3.6318
ABCA4	0.186	0.18544	0.97378	1	-3.6292
MBD3L2	0.1888	0.1883	0.97378	1	-3.6288
SKOR1	0.34131	0.34128	0.97378	1	-3.6274
NUDT2	0.34131	0.34128	0.97378	1	-3.6274
hsa-mir-542	0.34131	0.34128	0.97378	1	-3.6274
hsa-mir-6511a-4	0.34131	0.34128	0.97378	1	-3.6274
USPL1	0.19797	0.19737	0.97378	1	-3.6243
OR10H4	0.18507	0.18451	0.97378	1	-3.6234
hsa-mir-4804	0.19624	0.19568	0.97378	1	-3.6229
KLLN	0.18454	0.18396	0.97378	1	-3.6211
ATRX	0.19557	0.19497	0.97378	1	-3.6206
RNF19B	0.18428	0.18373	0.97378	1	-3.6163
CEP170B	0.16859	0.16825	0.969469	1	-3.6159
IFT74	0.19411	0.19356	0.97378	1	-3.6152
GOLGA6L1	0.16255	0.16211	0.969469	1	-3.6123
LOC440243	0.16255	0.16211	0.969469	1	-3.6123
OMD	0.19119	0.1907	0.97378	1	-3.6075
KBTBD6	0.18813	0.18759	0.97378	1	-3.607
CXCL14	0.17843	0.17811	0.969469	1	-3.6043
LMO7	0.19371	0.19321	0.97378	1	-3.6041
NUP188	0.17909	0.17874	0.969469	1	-3.6036
P4HB	0.3427	0.34267	0.97378	1	-3.5969
CD14	0.18149	0.181	0.973776	1	-3.5952
KERA	0.069073	0.12025	0.969469	1	-3.5902
SFTPB	0.19823	0.19761	0.97378	1	-3.5889
AKNA	0.1993	0.19863	0.97378	1	-3.5889
SHBG	0.1658	0.16541	0.969469	1	-3.5863
RBM48	0.15677	0.1564	0.969469	1	-3.5862
KRTAP12-2	0.13005	0.12957	0.969469	1	-3.5861
SNCG	0.20129	0.20063	0.97378	1	-3.5857
LIMK2	0.19026	0.18979	0.97378	1	-3.5797
CLRN1	0.18614	0.18558	0.97378	1	-3.5795
CKAP2	0.17604	0.17564	0.969469	1	-3.5779
SPEM1	0.16168	0.16124	0.969469	1	-3.5758
BMP8A	0.1759	0.1755	0.969469	1	-3.5722
KLC2	0.1969	0.19632	0.97378	1	-3.5717
hsa-mir-30d	0.18853	0.18801	0.97378	1	-3.5699
SREBF2	0.17378	0.17339	0.969469	1	-3.5697
OPTN	0.16434	0.16393	0.969469	1	-3.5686
FBXL18	0.19704	0.19646	0.97378	1	-3.5683
CLEC1A	0.19717	0.19657	0.97378	1	-3.5681
FOXR1	0.20182	0.20114	0.97378	1	-3.5675
FOLR3	0.34456	0.34455	0.97378	1	-3.5658
CDKN1C	0.18228	0.18179	0.97378	1	-3.5597
ATF6	0.17883	0.17846	0.969469	1	-3.5589
XRCC3	0.20116	0.20051	0.97378	1	-3.5588
DTD2	0.1763	0.17591	0.969469	1	-3.5582
CCDC3	0.20049	0.19979	0.97378	1	-3.5574
VCX3B	0.28278	0.32415	0.97378	1	-3.5572
PPP1R14B	0.18188	0.18141	0.97378	1	-3.5563
MRGPRX2	0.20328	0.2026	0.97378	1	-3.5506
WDR77	0.19903	0.19837	0.97378	1	-3.546
hsa-mir-1301	0.17551	0.17511	0.969469	1	-3.5458
hsa-mir-3656	0.18826	0.18774	0.97378	1	-3.5445
ACOXL	0.19092	0.19043	0.97378	1	-3.5407
ZMYND10	0.20474	0.20405	0.97378	1	-3.5387
hsa-mir-4425	0.20209	0.20139	0.97378	1	-3.5383
UGP2	0.20288	0.20218	0.97378	1	-3.5379
HSD17B6	0.20514	0.20443	0.97378	1	-3.5353
METTL23	0.34689	0.34676	0.97378	1	-3.534
ARID3B	0.34689	0.34676	0.97378	1	-3.534
GP1BB	0.34689	0.34676	0.97378	1	-3.534
UGT2A3	0.34689	0.34676	0.97378	1	-3.534
SLC3A1	0.34689	0.34676	0.97378	1	-3.534
TMEM249	0.34689	0.34676	0.97378	1	-3.534
hsa-mir-544a	0.34689	0.34676	0.97378	1	-3.534
MST1	0.19996	0.19928	0.97378	1	-3.5329
RFX7	0.17019	0.16976	0.969469	1	-3.5327
C15orf54	0.1981	0.19749	0.97378	1	-3.5261
C8orf82	0.15411	0.15381	0.969469	1	-3.526
FREM1	0.17484	0.17444	0.969469	1	-3.5244
hsa-mir-6831	0.17245	0.17206	0.969469	1	-3.5232
ACKR2	0.21153	0.27148	0.97378	1	-3.5196
CCBP2	0.21153	0.27148	0.97378	1	-3.5196
SLC16A5	0.20302	0.20233	0.97378	1	-3.5196
GIPC3	0.20249	0.20179	0.97378	1	-3.5176
hsa-mir-6842	0.19983	0.19915	0.97378	1	-3.5158
SYT2	0.18893	0.18845	0.97378	1	-3.513
hsa-mir-637	0.20647	0.20574	0.97378	1	-3.5115
ATP5D	0.19425	0.19367	0.97378	1	-3.5047
TAF7L	0.34928	0.34909	0.97378	1	-3.5015
hsa-mir-6071	0.34928	0.34909	0.97378	1	-3.5015
SLC23A1	0.34928	0.34909	0.97378	1	-3.5015
KCTD19	0.34928	0.34909	0.97378	1	-3.5015
FBXO25	0.34928	0.34909	0.97378	1	-3.5015
TSPAN31	0.34928	0.34909	0.97378	1	-3.5015
LTC4S	0.34928	0.34909	0.97378	1	-3.5015
BTAF1	0.34928	0.34909	0.97378	1	-3.5015
SPAG7	0.34928	0.34909	0.97378	1	-3.5015
LRRC4C	0.34928	0.34909	0.97378	1	-3.5015
FGFR1OP	0.049479	0.088031	0.962506	1	-3.5006
HEMK1	0.20833	0.20756	0.97378	1	-3.4995
MKKS	0.50968	0.51319	0.992794	1	-3.4988
hsa-mir-566	0.19837	0.19772	0.97378	1	-3.4973
SREK1	0.17258	0.17222	0.969469	1	-3.4948
HBD	0.0011297	0.0011102	0.929821	1	-3.4922
FAM204A	0.20621	0.20547	0.97378	1	-3.4908
FCRL5	0.20036	0.19966	0.97378	1	-3.4904
LARGE	0.19597	0.19539	0.97378	1	-3.4894
TMEM192	0.19278	0.19232	0.97378	1	-3.4882
TENM1	0.2082	0.20743	0.97378	1	-3.486
ACOT11	0.18654	0.18599	0.97378	1	-3.4848
SEMA3A	0.20262	0.2019	0.97378	1	-3.4833
CFL1	0.19106	0.19056	0.97378	1	-3.4816
NDUFS4	0.18999	0.18955	0.97378	1	-3.4753
QRICH2	0.19451	0.19392	0.97378	1	-3.4749
IL17D	0.20368	0.20299	0.97378	1	-3.4705
SNX8	0.20421	0.20354	0.97378	1	-3.4698
RUNX1	0.35154	0.3513	0.97378	1	-3.4682
hsa-mir-4780	0.35154	0.3513	0.97378	1	-3.4682
LRMP	0.35154	0.3513	0.97378	1	-3.4682
OR5AS1	0.35154	0.3513	0.97378	1	-3.4682
XKR8	0.35154	0.3513	0.97378	1	-3.4682
RCAN1	0.19637	0.19577	0.97378	1	-3.4671
PCDHB12	0.23228	0.28666	0.97378	1	-3.467
SCAMP5	0.20568	0.20499	0.97378	1	-3.4611
ZNF133	0.18069	0.18024	0.97208	1	-3.4562
DHRS3	0.21205	0.21127	0.97378	1	-3.455
SYT13	0.20265	0.26501	0.97378	1	-3.4518
GPR97	0.1864	0.18584	0.97378	1	-3.4497
CDHR1	0.20661	0.20588	0.97378	1	-3.4474
LCN2	0.21059	0.20978	0.97378	1	-3.4468
SHD	0.014698	0.027458	0.929821	1	-3.4455
MYLPF	0.20408	0.20339	0.97378	1	-3.4429
CAPN12	0.20169	0.20101	0.97378	1	-3.442
NACC2	0.20767	0.20694	0.97378	1	-3.4402
BTG2	0.21219	0.2114	0.97378	1	-3.439
hsa-mir-891b	0.21139	0.21057	0.97378	1	-3.4382
HLA-G	0.21232	0.21151	0.97378	1	-3.4374
PITHD1	0.21604	0.21518	0.97378	1	-3.4363
FGF5	0.20793	0.20721	0.97378	1	-3.4362
FDXACB1	0.20581	0.20509	0.97378	1	-3.4356
hsa-mir-4509-3	0.35586	0.35562	0.97378	1	-3.4342
hsa-mir-1253	0.35586	0.35562	0.97378	1	-3.4342
DOPEY1	0.35586	0.35562	0.97378	1	-3.4342
WNT2	0.35586	0.35562	0.97378	1	-3.4342
ANAPC4	0.35586	0.35562	0.97378	1	-3.4342
DBNL	0.35586	0.35562	0.97378	1	-3.4342
KIAA0513	0.35586	0.35562	0.97378	1	-3.4342
hsa-mir-4509-1	0.35586	0.35562	0.97378	1	-3.4342
SVIL	0.35586	0.35562	0.97378	1	-3.4342
TGM3	0.20009	0.19941	0.97378	1	-3.4299
LECT1	0.20886	0.20804	0.97378	1	-3.4261
UAP1L1	0.21737	0.2165	0.97378	1	-3.4237
SGK2	0.20966	0.20884	0.97378	1	-3.4231
PNMT	0.2098	0.20898	0.97378	1	-3.416
SLC12A6	0.1032	0.10279	0.969469	1	-3.4152
OTUD3	0.20607	0.20532	0.97378	1	-3.4085
WDHD1	0.21883	0.21803	0.97378	1	-3.4082
LRFN4	0.21857	0.21776	0.97378	1	-3.4051
NUTMF	0.21784	0.217	0.97378	1	-3.4049
NUTM2F	0.21784	0.217	0.97378	1	-3.4049
SCGB1A1	0.20315	0.20248	0.97378	1	-3.3984
SUDS3	0.2187	0.2179	0.97378	1	-3.3944
DEFB107B	0.21013	0.2093	0.97378	1	-3.3935
DEFB107A	0.21013	0.2093	0.97378	1	-3.3935
ISX	0.20142	0.20074	0.97378	1	-3.3922
RSC1A1	0.19318	0.19273	0.97378	1	-3.391
TYW5	0.20435	0.20367	0.97378	1	-3.3842
NADK	0.2078	0.20708	0.97378	1	-3.3809
hsa-mir-922	0.20275	0.20204	0.97378	1	-3.3798
LSAMP	0.2094	0.20859	0.97378	1	-3.3783
EDA2R	0.2195	0.21866	0.97378	1	-3.3771
TEAD3	0.21711	0.21625	0.97378	1	-3.3767
CD1E	0.53576	0.53782	0.992794	1	-3.3743
RALY	0.19969	0.19901	0.97378	1	-3.37
hsa-mir-181a-2	0.12588	0.2099	0.97378	1	-3.3697
COMMD6	0.19385	0.25884	0.97378	1	-3.3647
ALK	0.21936	0.21855	0.97378	1	-3.3625
TUBG1	0.19464	0.19405	0.97378	1	-3.362
KIFC3	0.22043	0.2196	0.97378	1	-3.3601
hsa-mir-5689	0.22162	0.22087	0.97378	1	-3.3593
AEBP2	0.21126	0.21043	0.97378	1	-3.3563
KIAA1210	0.21591	0.21504	0.97378	1	-3.3534
ATPBD4	0.20455	0.20387	0.97378	1	-3.3529
DPH6	0.20455	0.20387	0.97378	1	-3.3529
INPP1	0.21671	0.21585	0.97378	1	-3.3496
TBC1D7	0.21179	0.21099	0.97378	1	-3.3492
PSMC1	0.20674	0.206	0.97378	1	-3.3424
IGF2BP2	0.21644	0.21558	0.97378	1	-3.3408
ADCY1	0.20847	0.20767	0.97378	1	-3.3326
DPCR1	0.18946	0.18899	0.97378	1	-3.3304
SMPDL3A	0.20926	0.20844	0.97378	1	-3.328
LTA	0.21697	0.21612	0.97378	1	-3.3266
NUDT4	0.2199	0.21904	0.97378	1	-3.3199
STK35	0.20102	0.20038	0.97378	1	-3.3169
OR2M5	0.21551	0.21471	0.97378	1	-3.316
TAOK1	0.21923	0.21841	0.97378	1	-3.3152
SNAPIN	0.2175	0.21665	0.97378	1	-3.3105
hsa-mir-5787	0.22123	0.22043	0.97378	1	-3.3087
BIN2	0.22255	0.2218	0.97378	1	-3.3037
RHOF	0.22388	0.22311	0.97378	1	-3.2979
LIPG	0.2203	0.21947	0.97378	1	-3.2954
AK4	0.21804	0.21723	0.97378	1	-3.2952
ITPKC	0.20156	0.20087	0.97378	1	-3.2928
ST6GAL1	0.22508	0.2243	0.97378	1	-3.2882
hsa-mir-604	0.22202	0.22127	0.97378	1	-3.2853
TMEM213	0.22481	0.22405	0.97378	1	-3.2849
ZNF551	0.21764	0.21678	0.97378	1	-3.2819
NOVA1	0.22109	0.22027	0.97378	1	-3.2809
LONP2	0.39268	0.41091	0.97378	1	-3.2753
hsa-mir-548ay	0.22242	0.22166	0.97378	1	-3.2746
NR1H2	0.18307	0.25105	0.97378	1	-3.2737
OR2T4	0.20235	0.20165	0.97378	1	-3.2653
MADD	0.20554	0.20484	0.97378	1	-3.2636
CHTF8	0.22561	0.22483	0.97378	1	-3.2623
USP17L28	0.21398	0.21318	0.97378	1	-3.2565
USP17L20	0.21398	0.21318	0.97378	1	-3.2565
USP17L11	0.21398	0.21318	0.97378	1	-3.2565
USP17L22	0.21398	0.21318	0.97378	1	-3.2565
USP17L21	0.21398	0.21318	0.97378	1	-3.2565
USP17L26	0.21398	0.21318	0.97378	1	-3.2565
USP17L30	0.21398	0.21318	0.97378	1	-3.2565
USP17L24	0.21398	0.21318	0.97378	1	-3.2565
USP17L5	0.21398	0.21318	0.97378	1	-3.2565
USP17L19	0.21398	0.21318	0.97378	1	-3.2565
USP17L17	0.21398	0.21318	0.97378	1	-3.2565
USP17L27	0.21398	0.21318	0.97378	1	-3.2565
USP17L29	0.21398	0.21318	0.97378	1	-3.2565
USP17L12	0.21398	0.21318	0.97378	1	-3.2565
USP17L25	0.21398	0.21318	0.97378	1	-3.2565
USP17L13	0.21398	0.21318	0.97378	1	-3.2565
USP17L4	0.21398	0.21318	0.97378	1	-3.2565
USP17L3	0.21398	0.21318	0.97378	1	-3.2565
USP17L18	0.21398	0.21318	0.97378	1	-3.2565
2024-12-01	0.22309	0.22236	0.97378	1	-3.2511
OR51E2	0.20913	0.20832	0.97378	1	-3.2507
TWSG1	0.21564	0.21482	0.97378	1	-3.2491
CHAF1A	0.21897	0.21815	0.97378	1	-3.2443
ASPG	0.228	0.22729	0.97378	1	-3.2434
CADM3	0.22721	0.22643	0.97378	1	-3.2401
WNT3	0.22335	0.22261	0.97378	1	-3.2356
RNF122	0.22707	0.22629	0.97378	1	-3.2353
TBX1	0.21259	0.2118	0.97378	1	-3.2344
WFDC2	0.22747	0.22672	0.97378	1	-3.2326
BRINP2	0.22867	0.22796	0.97378	1	-3.2318
ZNF382	0.22269	0.22195	0.97378	1	-3.2307
PTPRN	0.22442	0.22362	0.97378	1	-3.2292
OR2S2	0.38895	0.40784	0.97378	1	-3.2268
MLXIPL	0.32927	0.36	0.97378	1	-3.2262
C4orf22	0.29767	0.33559	0.97378	1	-3.2243
RANGAP1	0.2288	0.22809	0.97378	1	-3.2235
hsa-mir-1469	0.21192	0.21114	0.97378	1	-3.2146
NCR3LG1	0.18521	0.18463	0.97378	1	-3.2138
MTCP1	0.22827	0.22755	0.97378	1	-3.2138
STRADB	0.22986	0.22911	0.97378	1	-3.2119
SCML2	0.22893	0.2282	0.97378	1	-3.2102
DENND1B	0.17564	0.17526	0.969469	1	-3.2073
ZNF468	0.23079	0.23007	0.97378	1	-3.2055
C11orf48	0.20687	0.20615	0.97378	1	-3.205
EXOC2	0.30677	0.34262	0.97378	1	-3.2041
EIF2B3	0.22322	0.22249	0.97378	1	-3.2032
EIF2B4	0.14369	0.22314	0.97378	1	-3.2011
C14orf159	0.22428	0.2235	0.97378	1	-3.1938
COA3	0.22774	0.22698	0.97378	1	-3.1931
NUS1	0.22574	0.22497	0.97378	1	-3.1926
RPS5	0.22455	0.22375	0.97378	1	-3.1878
SLC39A2	0.23	0.22924	0.97378	1	-3.1808
KCTD7	0.20528	0.20457	0.97378	1	-3.1805
ABCD4	0.21684	0.21599	0.97378	1	-3.1799
C12orf49	0.22495	0.22416	0.97378	1	-3.1798
GPT2	0.56796	0.56904	0.992794	1	-3.1683
CTTN	0.20222	0.20152	0.97378	1	-3.1681
HAUS6	0.23146	0.23078	0.97378	1	-3.1604
MFSD10	0.22216	0.22139	0.97378	1	-3.1592
METTL3	0.22973	0.22898	0.97378	1	-3.1582
OR6A2	0.23425	0.23356	0.97378	1	-3.1562
ABHD13	0.2191	0.21828	0.97378	1	-3.1541
BRD3	0.22601	0.22523	0.97378	1	-3.1537
PTPLA	0.5704	0.5715	0.992794	1	-3.1527
ZIM3	0.23199	0.23129	0.97378	1	-3.1465
COL15A1	0.23452	0.23379	0.97378	1	-3.1462
MCHR2	0.37368	0.39536	0.97378	1	-3.1432
CYBA	0.33947	0.3683	0.97378	1	-3.1429
EFR3A	0.12489	0.20839	0.97378	1	-3.1385
ZNF280D	0.45009	0.45978	0.991313	1	-3.1266
hsa-mir-941-1	0.23505	0.23436	0.97378	1	-3.1261
SAMD11	0.26682	0.3123	0.97378	1	-3.1239
SASS6	0.22548	0.22467	0.97378	1	-3.1195
FANCL	0.23691	0.23625	0.97378	1	-3.1193
RALGPS2	0.23757	0.23691	0.97378	1	-3.1159
NEU3	0.23571	0.23502	0.97378	1	-3.1129
hsa-mir-892a	0.23518	0.23447	0.97378	1	-3.1078
LYZL1	0.23106	0.23035	0.97378	1	-3.1072
STARD3	0.23013	0.22937	0.97378	1	-3.1052
TRIM29	0.23624	0.23557	0.97378	1	-3.1038
PEX6	0.22641	0.22561	0.97378	1	-3.1017
OR4C3	0.23279	0.23209	0.97378	1	-3.1007
COLQ	0.23239	0.23169	0.97378	1	-3.0984
PET112	0.23186	0.23116	0.97378	1	-3.0971
C17orf59	0.22375	0.22296	0.97378	1	-3.0898
TEFM	0.2381	0.23749	0.97378	1	-3.087
VSNL1	0.23305	0.23237	0.97378	1	-3.0838
RPRM	0.2385	0.23785	0.97378	1	-3.0832
TUSC5	0.22907	0.22832	0.97378	1	-3.0742
TMEM225	0.23465	0.23393	0.97378	1	-3.0736
hsa-mir-4524b	0.23963	0.23905	0.97378	1	-3.0709
hsa-mir-4524a	0.23963	0.23905	0.97378	1	-3.0709
OTOS	0.23864	0.238	0.97378	1	-3.0685
IRF2BPL	0.23611	0.23542	0.97378	1	-3.0642
AKAP10	0.2389	0.2383	0.97378	1	-3.0618
hsa-mir-326	0.20381	0.20315	0.97378	1	-3.0538
KRTAP5-9	0.23837	0.23774	0.97378	1	-3.0517
GPR112	0.23943	0.23885	0.97378	1	-3.0513
RANBP3	0.24103	0.24047	0.97378	1	-3.0507
TRO	0.24076	0.24021	0.97378	1	-3.0403
ANXA7	0.10186	0.17297	0.969469	1	-3.0397
hsa-mir-4505	0.2409	0.24034	0.97378	1	-3.0389
ITGA11	0.23877	0.23816	0.97378	1	-3.0366
IGFN1	0.23119	0.2305	0.97378	1	-3.0343
CNIH2	0.23664	0.23598	0.97378	1	-3.027
GALNT10	0.22814	0.22743	0.97378	1	-3.0253
PLEKHF2	0.23784	0.23721	0.97378	1	-3.0164
PRSS37	0.24355	0.24297	0.97378	1	-3.015
ARL5C	0.1985	0.19786	0.97378	1	-3.0089
ARFGEF1	0.24143	0.24089	0.97378	1	-3.008
TXNL4B	0.23491	0.2342	0.97378	1	-2.9949
MTHFD2L	0.22189	0.22115	0.97378	1	-2.9915
hsa-mir-3137	0.24595	0.24538	0.97378	1	-2.9915
ARID2	0.24568	0.24511	0.97378	1	-2.9913
MBD5	0.24395	0.24335	0.97378	1	-2.9892
OR4K13	0.24581	0.24526	0.97378	1	-2.9851
MAK16	0.24541	0.24485	0.97378	1	-2.9824
C7orf26	0.00066443	0.0013609	0.929821	1	-2.981
PPM1E	0.22588	0.2251	0.97378	1	-2.9808
FAM25G	0.24694	0.24639	0.97378	1	-2.9747
FAM25C	0.24694	0.24639	0.97378	1	-2.9747
CD84	0.24036	0.23981	0.97378	1	-2.9701
hsa-mir-6759	0.23292	0.23223	0.97378	1	-2.9658
PRR19	0.23678	0.23613	0.97378	1	-2.9652
NFKBID	0.24767	0.24712	0.97378	1	-2.9622
PCBD2	0.24422	0.24364	0.97378	1	-2.9553
C9orf131	0.24741	0.24688	0.97378	1	-2.9541
PALM2	0.23591	0.23522	0.97378	1	-2.9343
PALM2-AKAP2	0.23591	0.23522	0.97378	1	-2.9343
CDKN2A	0.45599	0.46491	0.992794	1	-2.9342
ITGA2B	0.24555	0.24499	0.97378	1	-2.932
ASUN	0.38437	0.40399	0.97378	1	-2.9149
LBX1	0.24993	0.24931	0.97378	1	-2.913
FAM19A1	0.2494	0.24882	0.97378	1	-2.9124
GLOD5	0.25047	0.24985	0.97378	1	-2.9088
hsa-mir-3622b	0.24468	0.24413	0.97378	1	-2.9076
hsa-mir-3622a	0.24468	0.24413	0.97378	1	-2.9076
CLEC12A	0.24382	0.24323	0.97378	1	-2.9074
PITX1	0.24023	0.23967	0.97378	1	-2.9052
HEATR1	0.68322	0.68612	0.993717	1	-2.8979
CPNE5	0.24495	0.2444	0.97378	1	-2.8935
CSRP2	0.33568	0.36518	0.97378	1	-2.8927
ATM	0.25007	0.24944	0.97378	1	-2.8752
POLR3C	0.25126	0.25068	0.97378	1	-2.8739
BZW1	0.25166	0.25108	0.97378	1	-2.8726
RFESD	0.24648	0.24589	0.97378	1	-2.8665
RPS21	0.23133	0.23064	0.97378	1	-2.8643
MMGT1	0.251	0.25039	0.97378	1	-2.8615
hsa-mir-3689b	0.19885	0.26235	0.97378	1	-2.8611
KBTBD13	0.23398	0.23331	0.97378	1	-2.8588
API5	0.23824	0.23762	0.97378	1	-2.8566
hsa-mir-3613	0.23385	0.23318	0.97378	1	-2.8525
AFAP1	0.25233	0.25174	0.97378	1	-2.8478
NUPL1	0.25326	0.25262	0.97378	1	-2.8423
GATAD2A	0.24714	0.24663	0.97378	1	-2.8411
UPRT	0.2498	0.24918	0.97378	1	-2.8386
EIF3B	0.24794	0.24738	0.97378	1	-2.837
ACO1	0.24448	0.24395	0.97378	1	-2.8322
hsa-mir-6867	0.24781	0.24724	0.97378	1	-2.8301
C10orf129	0.24409	0.24349	0.97378	1	-2.8295
MOB2	0.23797	0.23737	0.97378	1	-2.8272
hsa-mir-146b	0.33525	0.36483	0.97378	1	-2.826
NCBP1	0.46302	0.4711	0.992794	1	-2.8181
FLII	0.25432	0.25365	0.97378	1	-2.8177
F13A1	0.25365	0.253	0.97378	1	-2.8165
HNRNPM	0.23744	0.23678	0.97378	1	-2.8137
EZH2	0.24887	0.24831	0.97378	1	-2.8125
RPL5	0.25206	0.2515	0.97378	1	-2.8123
IKBKG	0.25419	0.25352	0.97378	1	-2.8121
ZC3HAV1L	0.25445	0.25376	0.97378	1	-2.8074
RASA4B	0.24189	0.2413	0.97378	1	-2.8071
CRTC3	0.31582	0.34947	0.97378	1	-2.8042
SUPT4H1	0.25485	0.25418	0.97378	1	-2.7997
SALL4	0.24621	0.24563	0.97378	1	-2.7961
ZBTB40	0.049997	0.088895	0.962506	1	-2.7958
SYCP1	0.25193	0.25137	0.97378	1	-2.7927
BMPR1A	0.55733	0.55847	0.992794	1	-2.7918
XKRY2	0.25066	0.25006	0.97378	1	-2.7908
XKRY	0.25066	0.25006	0.97378	1	-2.7908
hsa-mir-4420	0.25498	0.25433	0.97378	1	-2.7876
ZNF641	0.25552	0.25484	0.97378	1	-2.7874
GCG	0.25565	0.255	0.97378	1	-2.7865
PRAMEF13	0.48728	0.49267	0.992794	1	-2.7821
hsa-mir-3942	0.25631	0.25566	0.97378	1	-2.7789
DEF6	0.2502	0.24958	0.97378	1	-2.7781
UNC119B	0.25525	0.25458	0.97378	1	-2.7781
RET	0.23252	0.23184	0.97378	1	-2.7718
MIF4GD	0.25618	0.25554	0.97378	1	-2.7655
ATG3	0.25684	0.25624	0.97378	1	-2.7612
EPHX4	0.249	0.24843	0.97378	1	-2.756
hsa-mir-128-1	0.2514	0.2508	0.97378	1	-2.7505
ZNF527	0.25538	0.25472	0.97378	1	-2.7498
LIN54	0.25738	0.25682	0.97378	1	-2.7459
CEP57	0.25778	0.25727	0.97378	1	-2.7441
VPS52	0.25698	0.25639	0.97378	1	-2.7421
PDZD7	0.25339	0.25275	0.97378	1	-2.7416
MANEAL	0.2486	0.24807	0.97378	1	-2.7407
NUP43	0.25831	0.25783	0.97378	1	-2.7394
FOXB1	0.24834	0.24778	0.97378	1	-2.738
DNAJB7	0.08287	0.14237	0.969469	1	-2.7342
ZNF143	0.081597	0.14034	0.969469	1	-2.7312
TNFSF11	0.25751	0.25696	0.97378	1	-2.7257
MTMR1	0.1773	0.24695	0.97378	1	-2.7227
ZNF611	0.25392	0.25326	0.97378	1	-2.717
HAPLN4	0.25884	0.25836	0.97378	1	-2.7143
GSC2	0.27182	0.31604	0.97378	1	-2.7116
STMN4	0.25512	0.25446	0.97378	1	-2.7019
C12orf76	0.24807	0.24752	0.97378	1	-2.6994
ZNF276	0.25924	0.25876	0.97378	1	-2.6938
MUTYH	0.25977	0.25932	0.97378	1	-2.6783
MAPK9	0.2611	0.26062	0.97378	1	-2.6556
ARHGAP25	0.26136	0.2609	0.97378	1	-2.6553
ELMO2	0.26003	0.25958	0.97378	1	-2.6552
ZNF573	0.28363	0.28303	0.97378	1	-2.6534
TVP23C	0.26063	0.26014	0.97378	1	-2.6516
TVP23C-CDRT4	0.26063	0.26014	0.97378	1	-2.6516
hsa-mir-7-2	0.40125	0.41793	0.97378	1	-2.651
OR13C8	0.2615	0.26106	0.97378	1	-2.6493
EPHA8	0.26096	0.26048	0.97378	1	-2.642
TM4SF1	0.081852	0.14072	0.969469	1	-2.6208
NAA25	0.033866	0.061537	0.953186	1	-2.6198
ITPRIPL2	0.26322	0.26279	0.97378	1	-2.6149
DDR1	0.091505	0.15647	0.969469	1	-2.6146
PTPRC	0.041401	0.041498	0.95048	1	-2.6125
DERL1	0.28755	0.28702	0.97378	1	-2.6107
IMP3	0.10413	0.17634	0.969469	1	-2.6048
GNL2	0.55058	0.55201	0.992794	1	-2.6001
DPT	0.25817	0.25772	0.97378	1	-2.5998
UGT3A1	0.36142	0.38547	0.97378	1	-2.5964
OR10G9	0.26389	0.26344	0.97378	1	-2.5944
DHX57	0.15887	0.23386	0.97378	1	-2.5856
ZNF213	0.37705	0.39802	0.97378	1	-2.5852
hsa-mir-4788	0.25113	0.25055	0.97378	1	-2.5799
PET100	0.25897	0.25848	0.97378	1	-2.5787
KLHL13	0.26269	0.26223	0.97378	1	-2.5754
ACTN4	0.2591	0.25862	0.97378	1	-2.5751
TMEM116	0.26203	0.26156	0.97378	1	-2.5728
THADA	0.11517	0.19341	0.97378	1	-2.5625
PVRL4	0.26482	0.26439	0.97378	1	-2.5614
hsa-mir-4491	0.26349	0.26305	0.97378	1	-2.5601
ACAT1	0.13085	0.21431	0.97378	1	-2.5571
CALML4	0.26509	0.26469	0.97378	1	-2.5529
KRTAP7-1	0.32524	0.35677	0.97378	1	-2.5491
TEX10	0.26469	0.26422	0.97378	1	-2.5476
PRELID2	0.26362	0.26318	0.97378	1	-2.5414
RGS8	0.26229	0.26184	0.97378	1	-2.534
RNF32	0.25658	0.25597	0.97378	1	-2.5334
NDUFAF5	0.26023	0.25978	0.97378	1	-2.5233
TFDP1	0.26023	0.25978	0.97378	1	-2.5233
PARP8	0.26788	0.26749	0.97378	1	-2.5207
OXNAD1	0.26083	0.26035	0.97378	1	-2.5195
RYR3	0.22504	0.28135	0.97378	1	-2.5178
PRAMEF11	0.29386	0.29318	0.97378	1	-2.517
hsa-mir-3689e	0.0018598	0.0036481	0.929821	1	-2.5139
NFE2L2	0.26495	0.26454	0.97378	1	-2.5104
PNMA1	0.26827	0.26791	0.97378	1	-2.5104
CYP3A7	0.057283	0.057331	0.953186	1	-2.4984
CYP3A7-CYP3AP1	0.057283	0.057331	0.953186	1	-2.4984
C1QL3	0.10086	0.17134	0.969469	1	-2.4973
MAP3K9	0.26668	0.26632	0.97378	1	-2.4867
TMEM217	0.26256	0.26209	0.97378	1	-2.4851
NMUR2	0.25791	0.25744	0.97378	1	-2.475
CHRNA6	0.26934	0.26899	0.97378	1	-2.4724
MEX3C	0.055622	0.055639	0.953186	1	-2.4722
UBE2Z	0.26681	0.26644	0.97378	1	-2.4585
CUX1	0.25711	0.25652	0.97378	1	-2.4565
LIFR	0.022335	0.041214	0.95048	1	-2.4502
ATAD3A	0.2708	0.27042	0.97378	1	-2.4487
CD300LF	0.26708	0.2667	0.97378	1	-2.4468
RPL7L1	0.2619	0.26143	0.97378	1	-2.4284
RESP18	0.25804	0.25758	0.97378	1	-2.425
IMMP2L	0.27173	0.27136	0.97378	1	-2.4215
hsa-mir-4532	0.27093	0.27054	0.97378	1	-2.4159
PRR18	0.06445	0.11281	0.969469	1	-2.4146
C15orf60	0.2696	0.26923	0.97378	1	-2.4144
PDE11A	0.26548	0.26512	0.97378	1	-2.4137
ZNF208	0.26641	0.26603	0.97378	1	-2.4056
HADHB	0.37642	0.39752	0.97378	1	-2.4055
TPBGL	0.27253	0.27221	0.97378	1	-2.4047
hsa-mir-7155	0.27213	0.27177	0.97378	1	-2.4035
hsa-mir-8077	0.070098	0.12184	0.969469	1	-2.3987
POLH	0.40382	0.42006	0.97378	1	-2.3971
LRIT2	0.26854	0.26816	0.97378	1	-2.3967
WNT2B	0.27279	0.27247	0.97378	1	-2.3883
ACTA1	0.2724	0.27207	0.97378	1	-2.3875
COL23A1	0.27306	0.27271	0.97378	1	-2.3821
ETV4	0.26761	0.26724	0.97378	1	-2.3808
PPARG	0.059301	0.1044	0.969469	1	-2.3806
OPN4	0.075824	0.075611	0.953186	1	-2.3717
HLA-DMA	0.27439	0.27406	0.97378	1	-2.3656
ADORA3	0.088982	0.08869	0.962506	1	-2.3409
PPIE	0.27226	0.27191	0.97378	1	-2.3402
HRC	0.26216	0.26171	0.97378	1	-2.3372
TOP2A	0.26894	0.2686	0.97378	1	-2.3343
CD200	0.020232	0.037325	0.929821	1	-2.3221
DDT	0.16082	0.23524	0.97378	1	-2.3206
CKLF-CMTM1	0.23181	0.28628	0.97378	1	-2.3191
ZNF121	0.25153	0.25093	0.97378	1	-2.3139
AURKAIP1	0.26801	0.26764	0.97378	1	-2.3108
MAN2B1	0.23983	0.23921	0.97378	1	-2.3071
2024-09-12	0.37579	0.39701	0.97378	1	-2.3049
hsa-mir-6131	0.11889	0.11838	0.969469	1	-2.3044
KLK2	0.1954	0.25992	0.97378	1	-2.3037
LDHB	0.27133	0.27094	0.97378	1	-2.303
PCGF1	0.27652	0.27621	0.97378	1	-2.2864
CDON	0.31313	0.31261	0.97378	1	-2.2824
KLF1	0.19289	0.25819	0.97378	1	-2.2818
RPS15	0.51321	0.51644	0.992794	1	-2.2818
TMEM231	0.12088	0.12039	0.969469	1	-2.2796
EIF5A2	0.27678	0.27646	0.97378	1	-2.2647
hsa-mir-518e	0.22902	0.28422	0.97378	1	-2.2615
CCDC120	0.27731	0.27696	0.97378	1	-2.2594
XBP1	0.27333	0.27296	0.97378	1	-2.2585
SLC22A18AS	0.26522	0.26484	0.97378	1	-2.2508
SEC62	0.12872	0.12829	0.969469	1	-2.2495
MEA1	0.012058	0.02267	0.929821	1	-2.2453
VANGL2	0.53304	0.53523	0.992794	1	-2.2403
C8orf44	0.27691	0.2766	0.97378	1	-2.2365
hsa-mir-7846	0.096313	0.16427	0.969469	1	-2.2346
TMEM132E	0.27665	0.27635	0.97378	1	-2.228
TLK1	0.27957	0.27913	0.97378	1	-2.2247
HLA-DQB1	0.27266	0.27233	0.97378	1	-2.2189
FREM3	0.18235	0.25055	0.97378	1	-2.2164
RASGEF1C	0.28581	0.3264	0.97378	1	-2.2121
SUSD2	0.26867	0.26831	0.97378	1	-2.2103
GABRR2	0.26881	0.26847	0.97378	1	-2.2099
STON1-GTF2A1L	0.2866	0.32697	0.97378	1	-2.2092
STON1	0.2866	0.32697	0.97378	1	-2.2092
PEX11A	0.27346	0.2731	0.97378	1	-2.2088
SLC16A3	0.33156	0.36187	0.97378	1	-2.2053
MAP2K4	0.27864	0.27824	0.97378	1	-2.2009
NAT8	0.27	0.26963	0.97378	1	-2.196
MAST1	0.27452	0.27419	0.97378	1	-2.1946
hsa-mir-3674	0.2813	0.2808	0.97378	1	-2.1896
MAPRE3	0.27718	0.27683	0.97378	1	-2.1877
EDF1	0.27505	0.27476	0.97378	1	-2.166
ANGPTL2	0.32851	0.35941	0.97378	1	-2.158
CHCHD7	0.28236	0.28183	0.97378	1	-2.158
GPR139	0.56112	0.56211	0.992794	1	-2.153
ST6GALNAC4	0.13856	0.1382	0.969469	1	-2.148
RAB3IL1	0.27877	0.27835	0.97378	1	-2.1472
NUP210L	0.10746	0.10705	0.969469	1	-2.1433
CLIC2	0.28117	0.28068	0.97378	1	-2.1424
CHPF	0.20075	0.26365	0.97378	1	-2.1409
IL25	0.27532	0.275	0.97378	1	-2.1283
PLA2R1	0.13643	0.13598	0.969469	1	-2.1247
CCDC81	0.27412	0.27379	0.97378	1	-2.1208
IL7R	0.28037	0.27993	0.97378	1	-2.1167
CTNNAL1	0.28196	0.28145	0.97378	1	-2.1113
TLR8	0.16913	0.16878	0.969469	1	-2.1112
RGS14	0.26947	0.26912	0.97378	1	-2.1101
UROS	0.30633	0.34228	0.97378	1	-2.1099
WDFY4	0.28422	0.28364	0.97378	1	-2.1056
ASAH2	0.14414	0.14386	0.969469	1	-2.0981
POTEC	0.27605	0.27573	0.97378	1	-2.0972
FBXO21	0.43381	0.44548	0.981828	1	-2.0963
ACOX1	0.5795	0.58034	0.992794	1	-2.0857
C10orf32	0.48022	0.48624	0.992794	1	-2.0796
ZXDB	0.15889	0.15855	0.969469	1	-2.0773
PLCXD1_X	0.27818	0.27778	0.97378	1	-2.0712
PLCXD1_Y	0.27818	0.27778	0.97378	1	-2.0712
CHEK2	0.28582	0.28523	0.97378	1	-2.0676
ZUFSP	0.2797	0.27928	0.97378	1	-2.0575
SLC35A4	0.28316	0.28255	0.97378	1	-2.053
MRPL39	0.28675	0.28617	0.97378	1	-2.0525
PHB2	0.37116	0.39332	0.97378	1	-2.0521
STXBP5	0.57657	0.57755	0.992794	1	-2.051
C12orf29	0.2805	0.28004	0.97378	1	-2.05
C15orf38-AP3S2	0.29644	0.33465	0.97378	1	-2.0484
RNF111	0.28449	0.2839	0.97378	1	-2.0474
SIVA1	0.28688	0.28631	0.97378	1	-2.0426
ZNF620	0.27944	0.27899	0.97378	1	-2.0399
HLA-E	0.33466	0.3345	0.97378	1	-2.0372
BRINP3	0.53612	0.53817	0.992794	1	-2.0356
DCUN1D2	0.020758	0.038311	0.929821	1	-2.0346
PCDH1	0.28383	0.28323	0.97378	1	-2.0328
hsa-mir-548w	0.29388	0.33263	0.97378	1	-2.0305
SYNE3	0.32065	0.35321	0.97378	1	-2.0295
CIDEC	0.27984	0.27941	0.97378	1	-2.0195
CALCOCO2	0.28024	0.27979	0.97378	1	-2.0187
MRGPRF	0.28967	0.28912	0.97378	1	-2.0186
LCE2A	0.28768	0.28717	0.97378	1	-2.018
hsa-mir-7156	0.58509	0.58593	0.992794	1	-2.0174
hsa-mir-6852	0.28154	0.32325	0.97378	1	-2.0152
hsa-mir-3941	0.28795	0.28743	0.97378	1	-2.0109
hsa-mir-644a	0.093278	0.15931	0.969469	1	-2.0089
hsa-mir-6826	0.28103	0.28056	0.97378	1	-2.008
FGF3	0.27492	0.27462	0.97378	1	-2.0042
TRPM7	0.28981	0.28921	0.97378	1	-1.9938
PLSCR2	0.55192	0.5533	0.992794	1	-1.9886
CALHM3	0.2801	0.27966	0.97378	1	-1.9862
OR1J1	0.066249	0.11569	0.969469	1	-1.9837
PLEKHB1	0.27068	0.31512	0.97378	1	-1.9811
SUMF2	0.32174	0.35407	0.97378	1	-1.977
PRKCSH	0.29047	0.28986	0.97378	1	-1.9762
DGCR2	0.2914	0.29074	0.97378	1	-1.9751
PHF15	0.28848	0.28795	0.97378	1	-1.9728
UQCRQ	0.28888	0.28834	0.97378	1	-1.969
UTP6	0.28569	0.28511	0.97378	1	-1.9634
OR2C3	0.27319	0.27285	0.97378	1	-1.9622
CTAG2	0.16155	0.23576	0.97378	1	-1.9471
SERPINI1	0.28821	0.28771	0.97378	1	-1.9448
PMP2	0.20052	0.2635	0.97378	1	-1.944
CXorf61	0.27931	0.27886	0.97378	1	-1.9409
[truncated: 962 more rows]
