# Supplementary material for: Hyaluronan catabolism supports the peritoneal disseminated metastasis of cancer through the glucuronic acid pathway
Source: Research Square preprint supplement (doi:10.21203/rs.3.rs-7691213/v1), 2025-11-19
Supplement: Supplementary file 2 [file 33945423c571f55576fce1f5.docx]

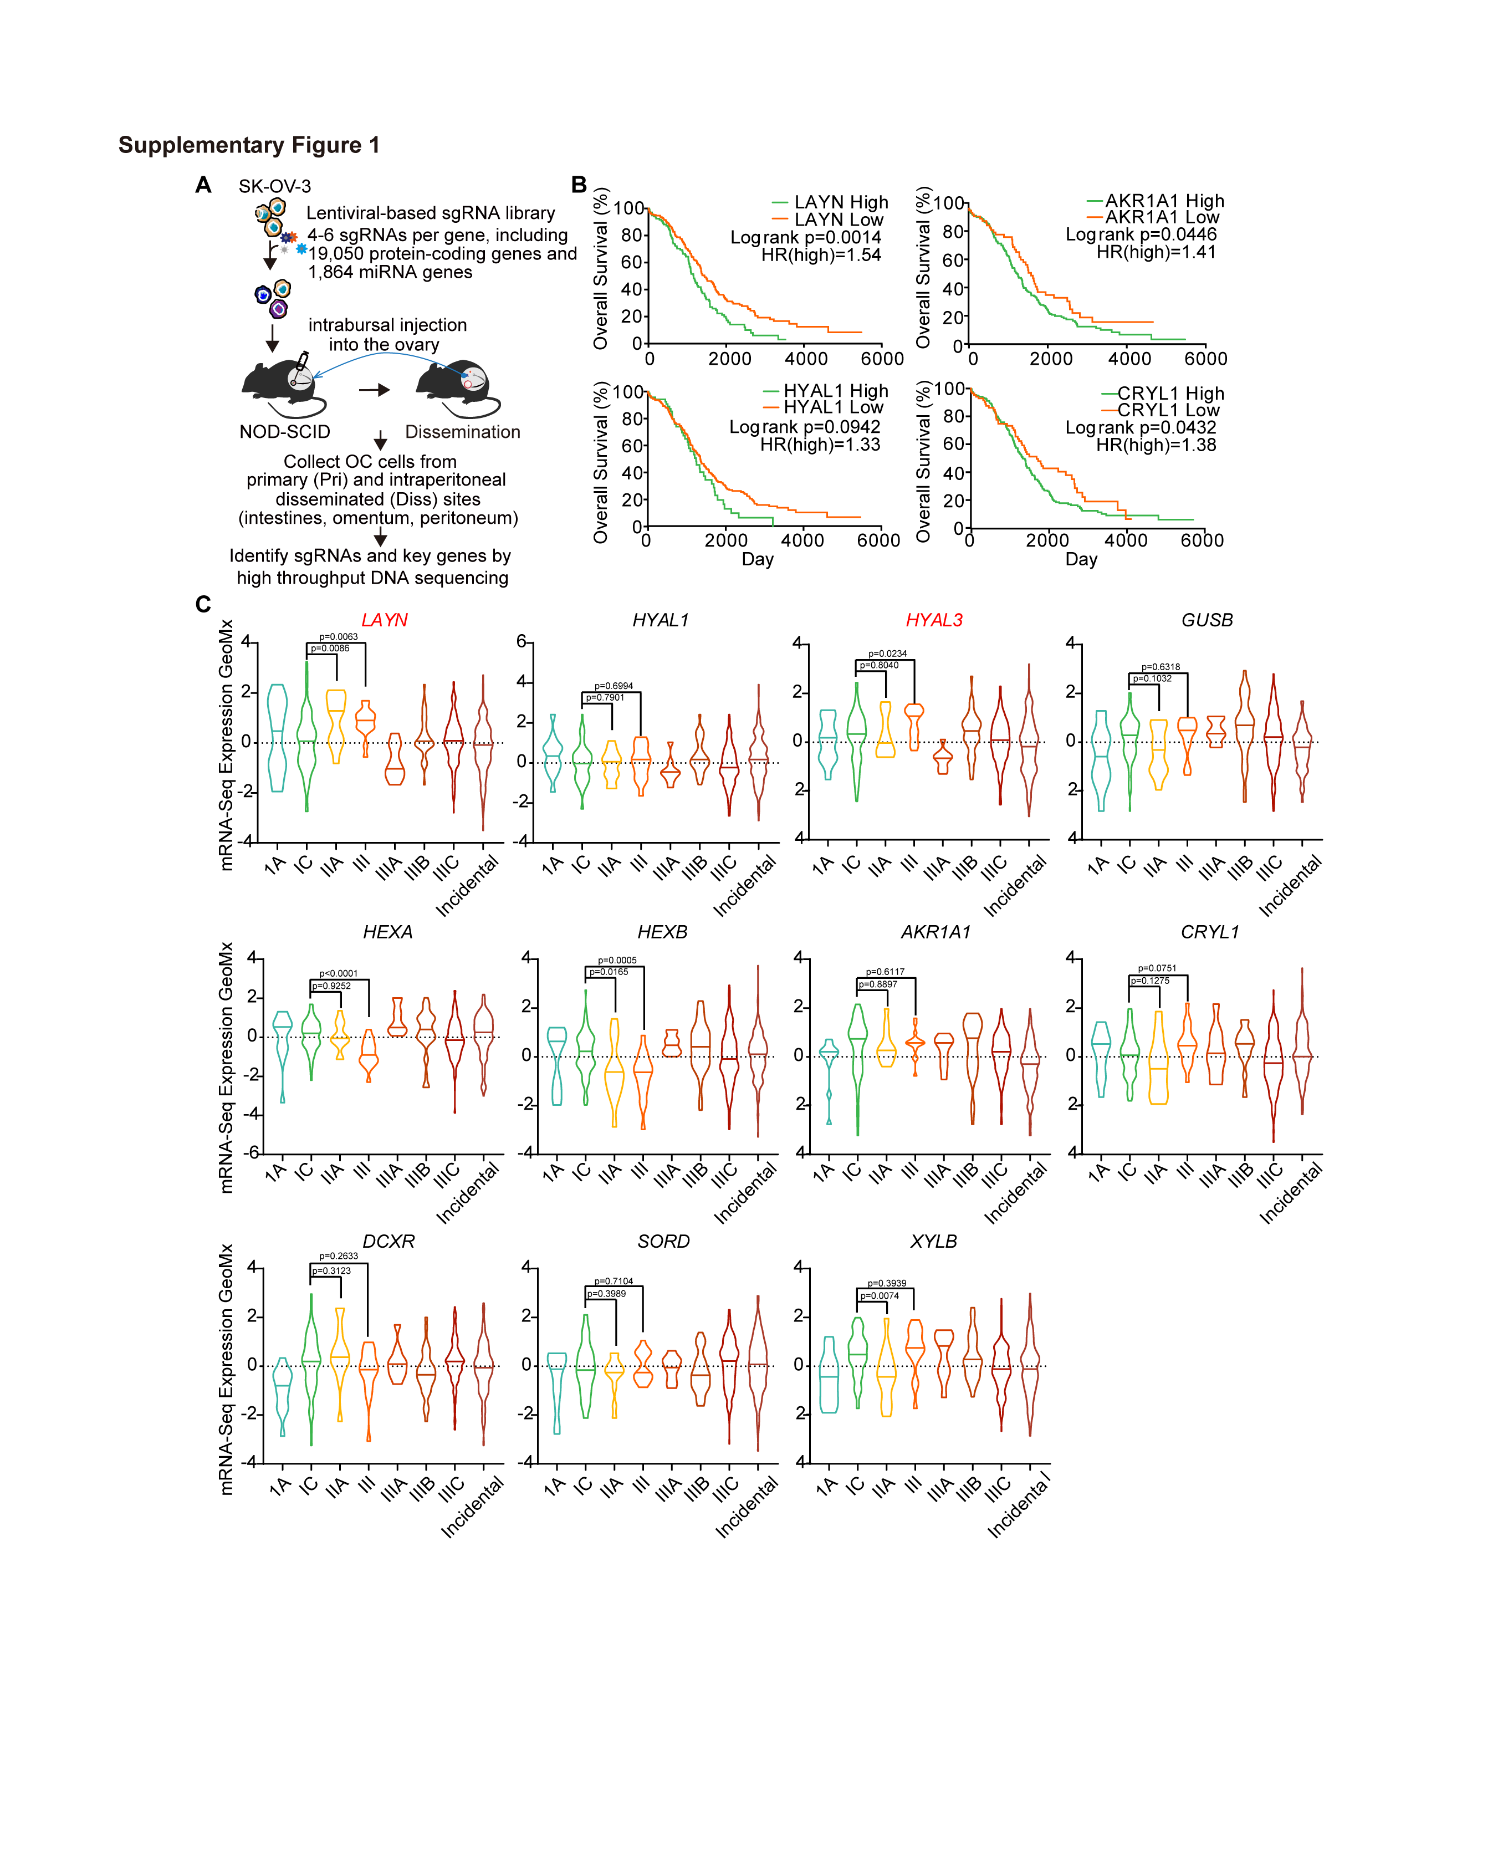


**Supplementary Figure 1. HA catabolism and GlcA pathway genes identified by CRISPR/Cas9-based systematic screen correlate with the progression and survival of OC patients.**

**A** The schematic diagram of CRISPR/Cas9 library-based screen of key genes regulating peritoneal dissemination in the orthotopic murine model of OC. **B** Survival curves to show the overall survival (OS) of OC patients with different indicated gene expression from the TCGA database (n=349, *p < 0.05, **p < 0.01). **C** The mRNA expression profiles of HA metabolism and GlcA pathway genes across different stages of an OC cohort from TCGA database.


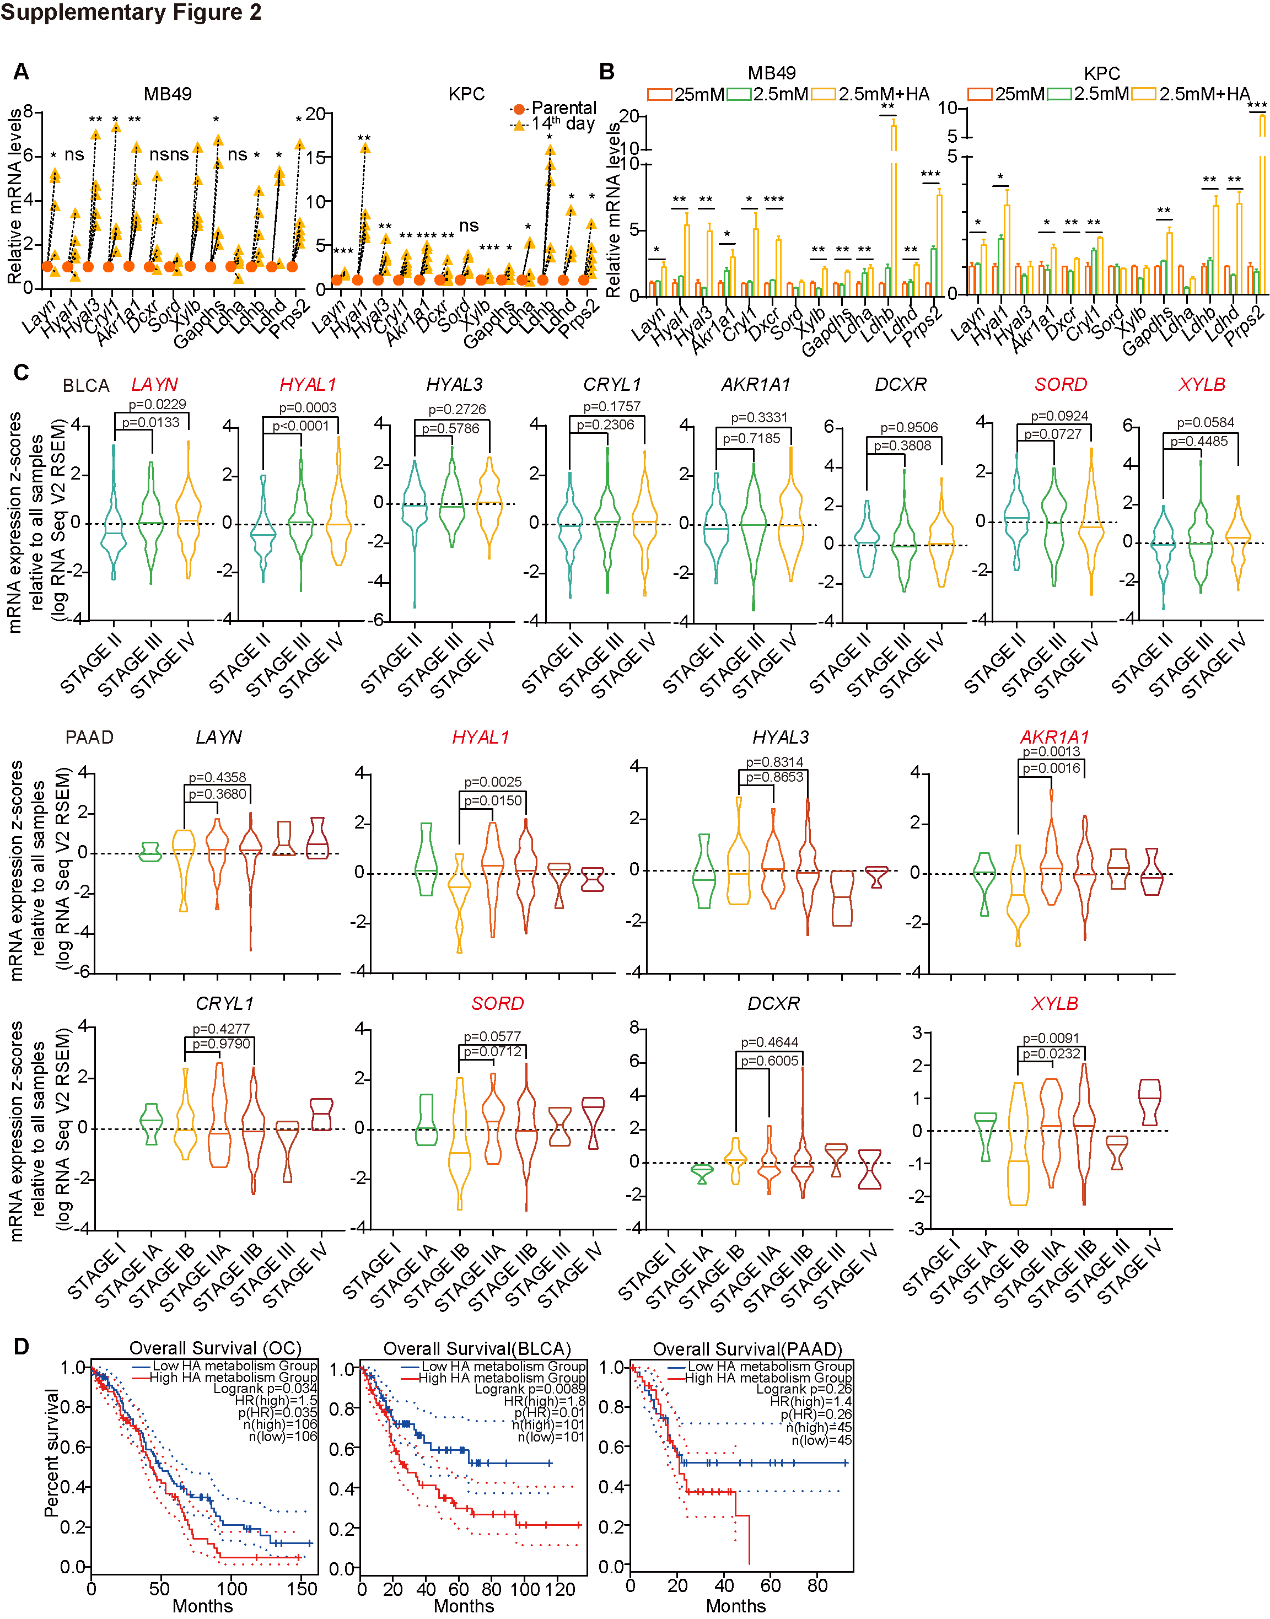


**Supplementary Figure 2. HA catabolism and GlcA pathway genes of BLCA and PAAD cells are induced in peritoneal environment and correlate with tumor progression and survival of patients**

**A** RT-qPCR analysis of HA catabolism genes and GlcA pathway in intraperitoneally disseminated MB49 and KPC cells, compared to those in the parental cells (Parental). Data are represented as means ± SEM of five biological replicates (***p < 0.001, **p < 0.01, *p < 0.05, by unpaired Student’s t-test). **B** RT-qPCR analysis of genes involved in HA catabolism in KPC and MB49 cells in HA replenishment and low-glucose condition (means ± SEM from three independent replicates, **p < 0.01, *p < 0.05, ***p < 0.001 by unpaired Student’s t-test).**C** The mRNA expression profiles of HA metabolism and GlcA pathway genes in BLCA and PAAD at different stages. **D** Overall survival analyses of OC, BLCA and PAAD patients separated by expression levels of a gene set comprising key HA catabolism and GlcA pathway genes (including *LAYN, HYAL1, AKR1A1, CRYL1, XYLB*).


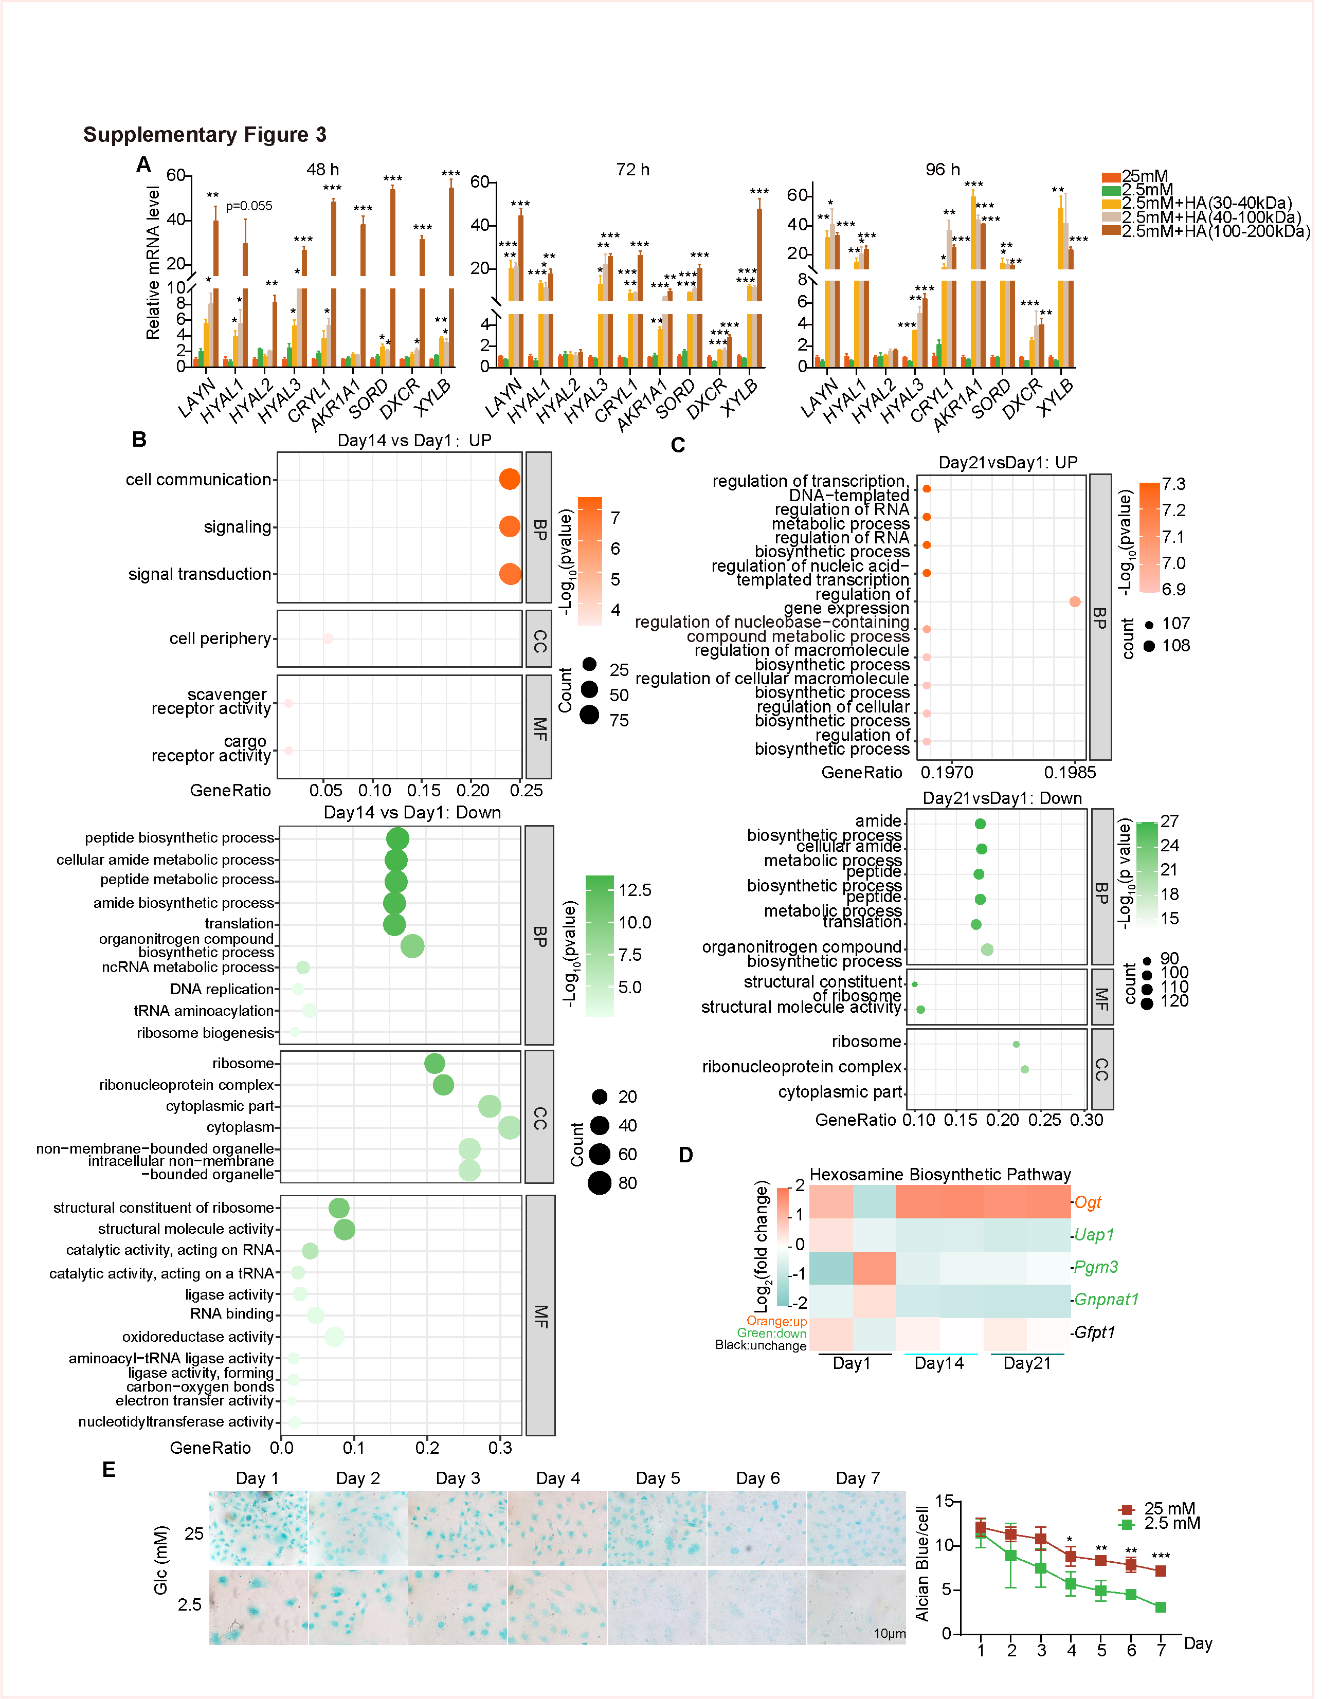


**Supplementary Figure 3. HA size-dependent effects on the induction of HA catabolism and GlcA pathway genes and the transcriptomic profiles of OC cells inoculated into the peritoneal environment.**

**A** RT-qPCR analyses of HA catabolism genes and GlcA pathway genes induced by different sizes of HA fragments (0.1 mg/mL) in low-glucose conditions at 48 h, 72 h, and 96 h. Data are presented as means ± SEM from three independent experiments. Statistical significances were determined by unpaired Student’s t-test (**p < 0.01, *p < 0.05, ***p < 0.001). **B, C** GO enrichment analyses of the significantly altered pathways for up-regulated (**B**) and down-regulated (**C**) genes at Day 14 and Day 21 in disseminated ID8 cells identified by RNA-seq. **D** Hexosamine biosynthesis pathway (HBP) gene expression heatmap in disseminated ID8 cells, with upregulated genes (orange) and downregulated genes (green). **E** Alcian blue staining showing HA degradation in OC cells cultured in low-glucose versus high-glucose (25 mM) conditions. (n=3 biological replicates; ***p < 0.001, **p < 0.01, *p < 0.05, unpaired Student’s t-test).


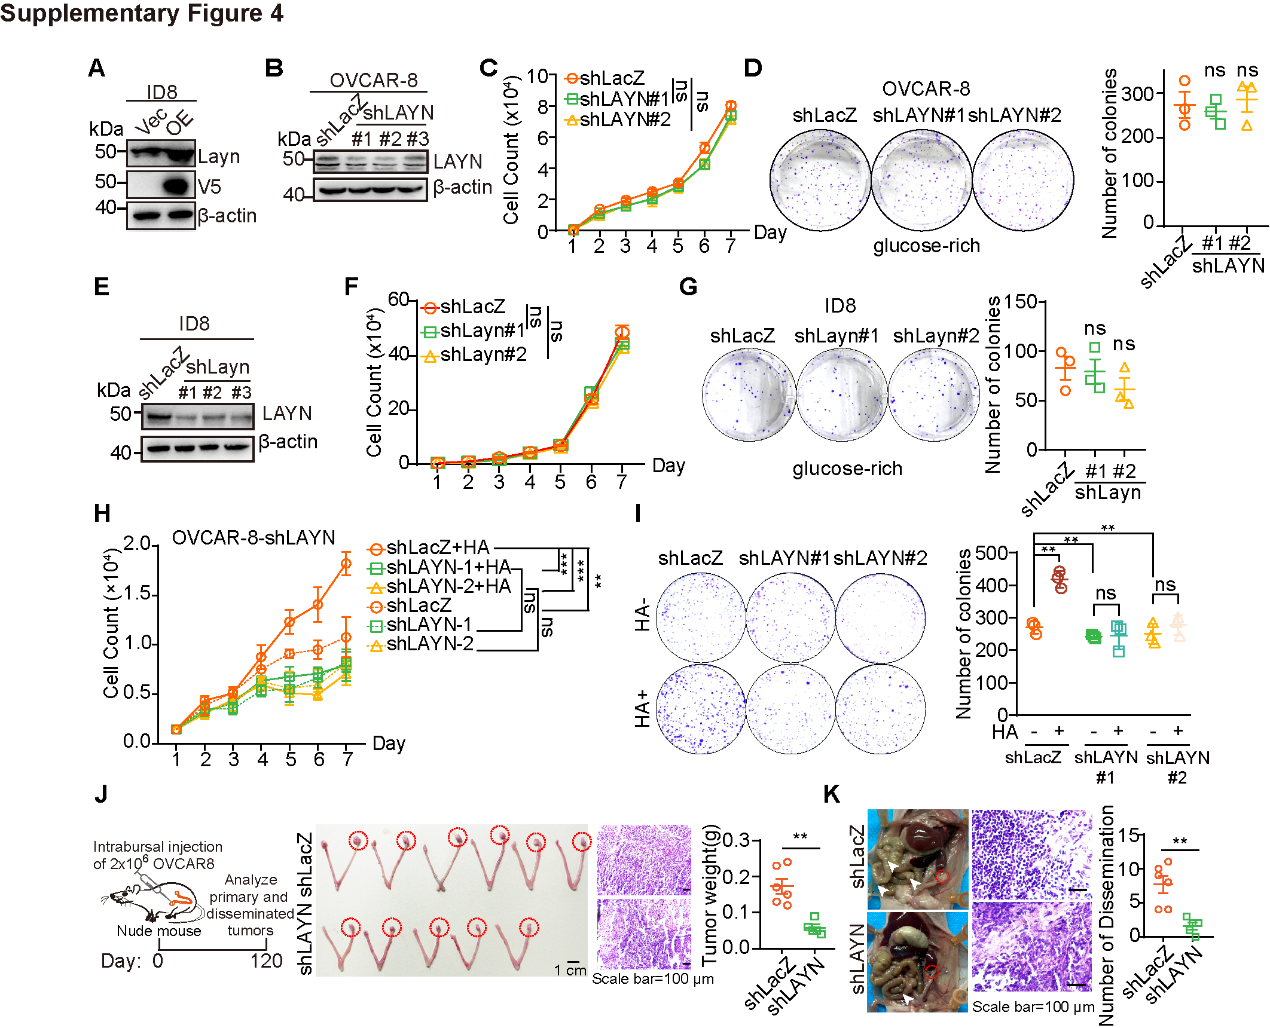


**Supplementary Figure 4. LAYN sustains the proliferation of OC cells in low-glucose condition and promotes OC growth and dissemination in mice**

**A**, **B** Western blot analysis of LAYN- (OE) or Vec-transfected ID8 cells (**A**) and LAYN-silenced (shLAYN) or control (shLacZ) OVCAR-8 cells (**B**). **C, D** The proliferation curves (**C**) or colony formation assays (**D**) of OVCAR-8 cells in glucose-rich (25 mM) medium. **E-G** Western blot analysis of Layn-silenced (shLayn) or control (shLacZ) ID8 cells (**E**), and their proliferation curves (**F**) and colony formation assays (**G**) in glucose-rich (25 mM) medium. **H, I** The proliferation curves (**H**) and colony formation assays (**I**) of shLAYN- or shLacZ-transfected OVCAR-8 cells in low-glucose (2.5 mM) medium supplemented with (solid lines) or without (dash lines) HA. Data are presented as means ± SEM from three independent experiments, ***p < 0.001, **p < 0.01, ns not significant. Significances were analyzed by two-way ANOVA test in **C**, **F** and **H**, unpaired Student’s t-test in **D**, **G** and **I**. **J** The schematic of orthotopic murine model of OC by intrabursal injection of LAYN-silenced or control OVCAR-8 cells (left panel).Theimages of the dissected primary tumors and the HE-staining analysis and their weight results are shown in the right panels. **K** Representative images and HE staining of the peritoneal disseminated OC nodules and the quantification results (n=5–6, means ± SEM, **p < 0.01, by unpaired Student’s t-test).


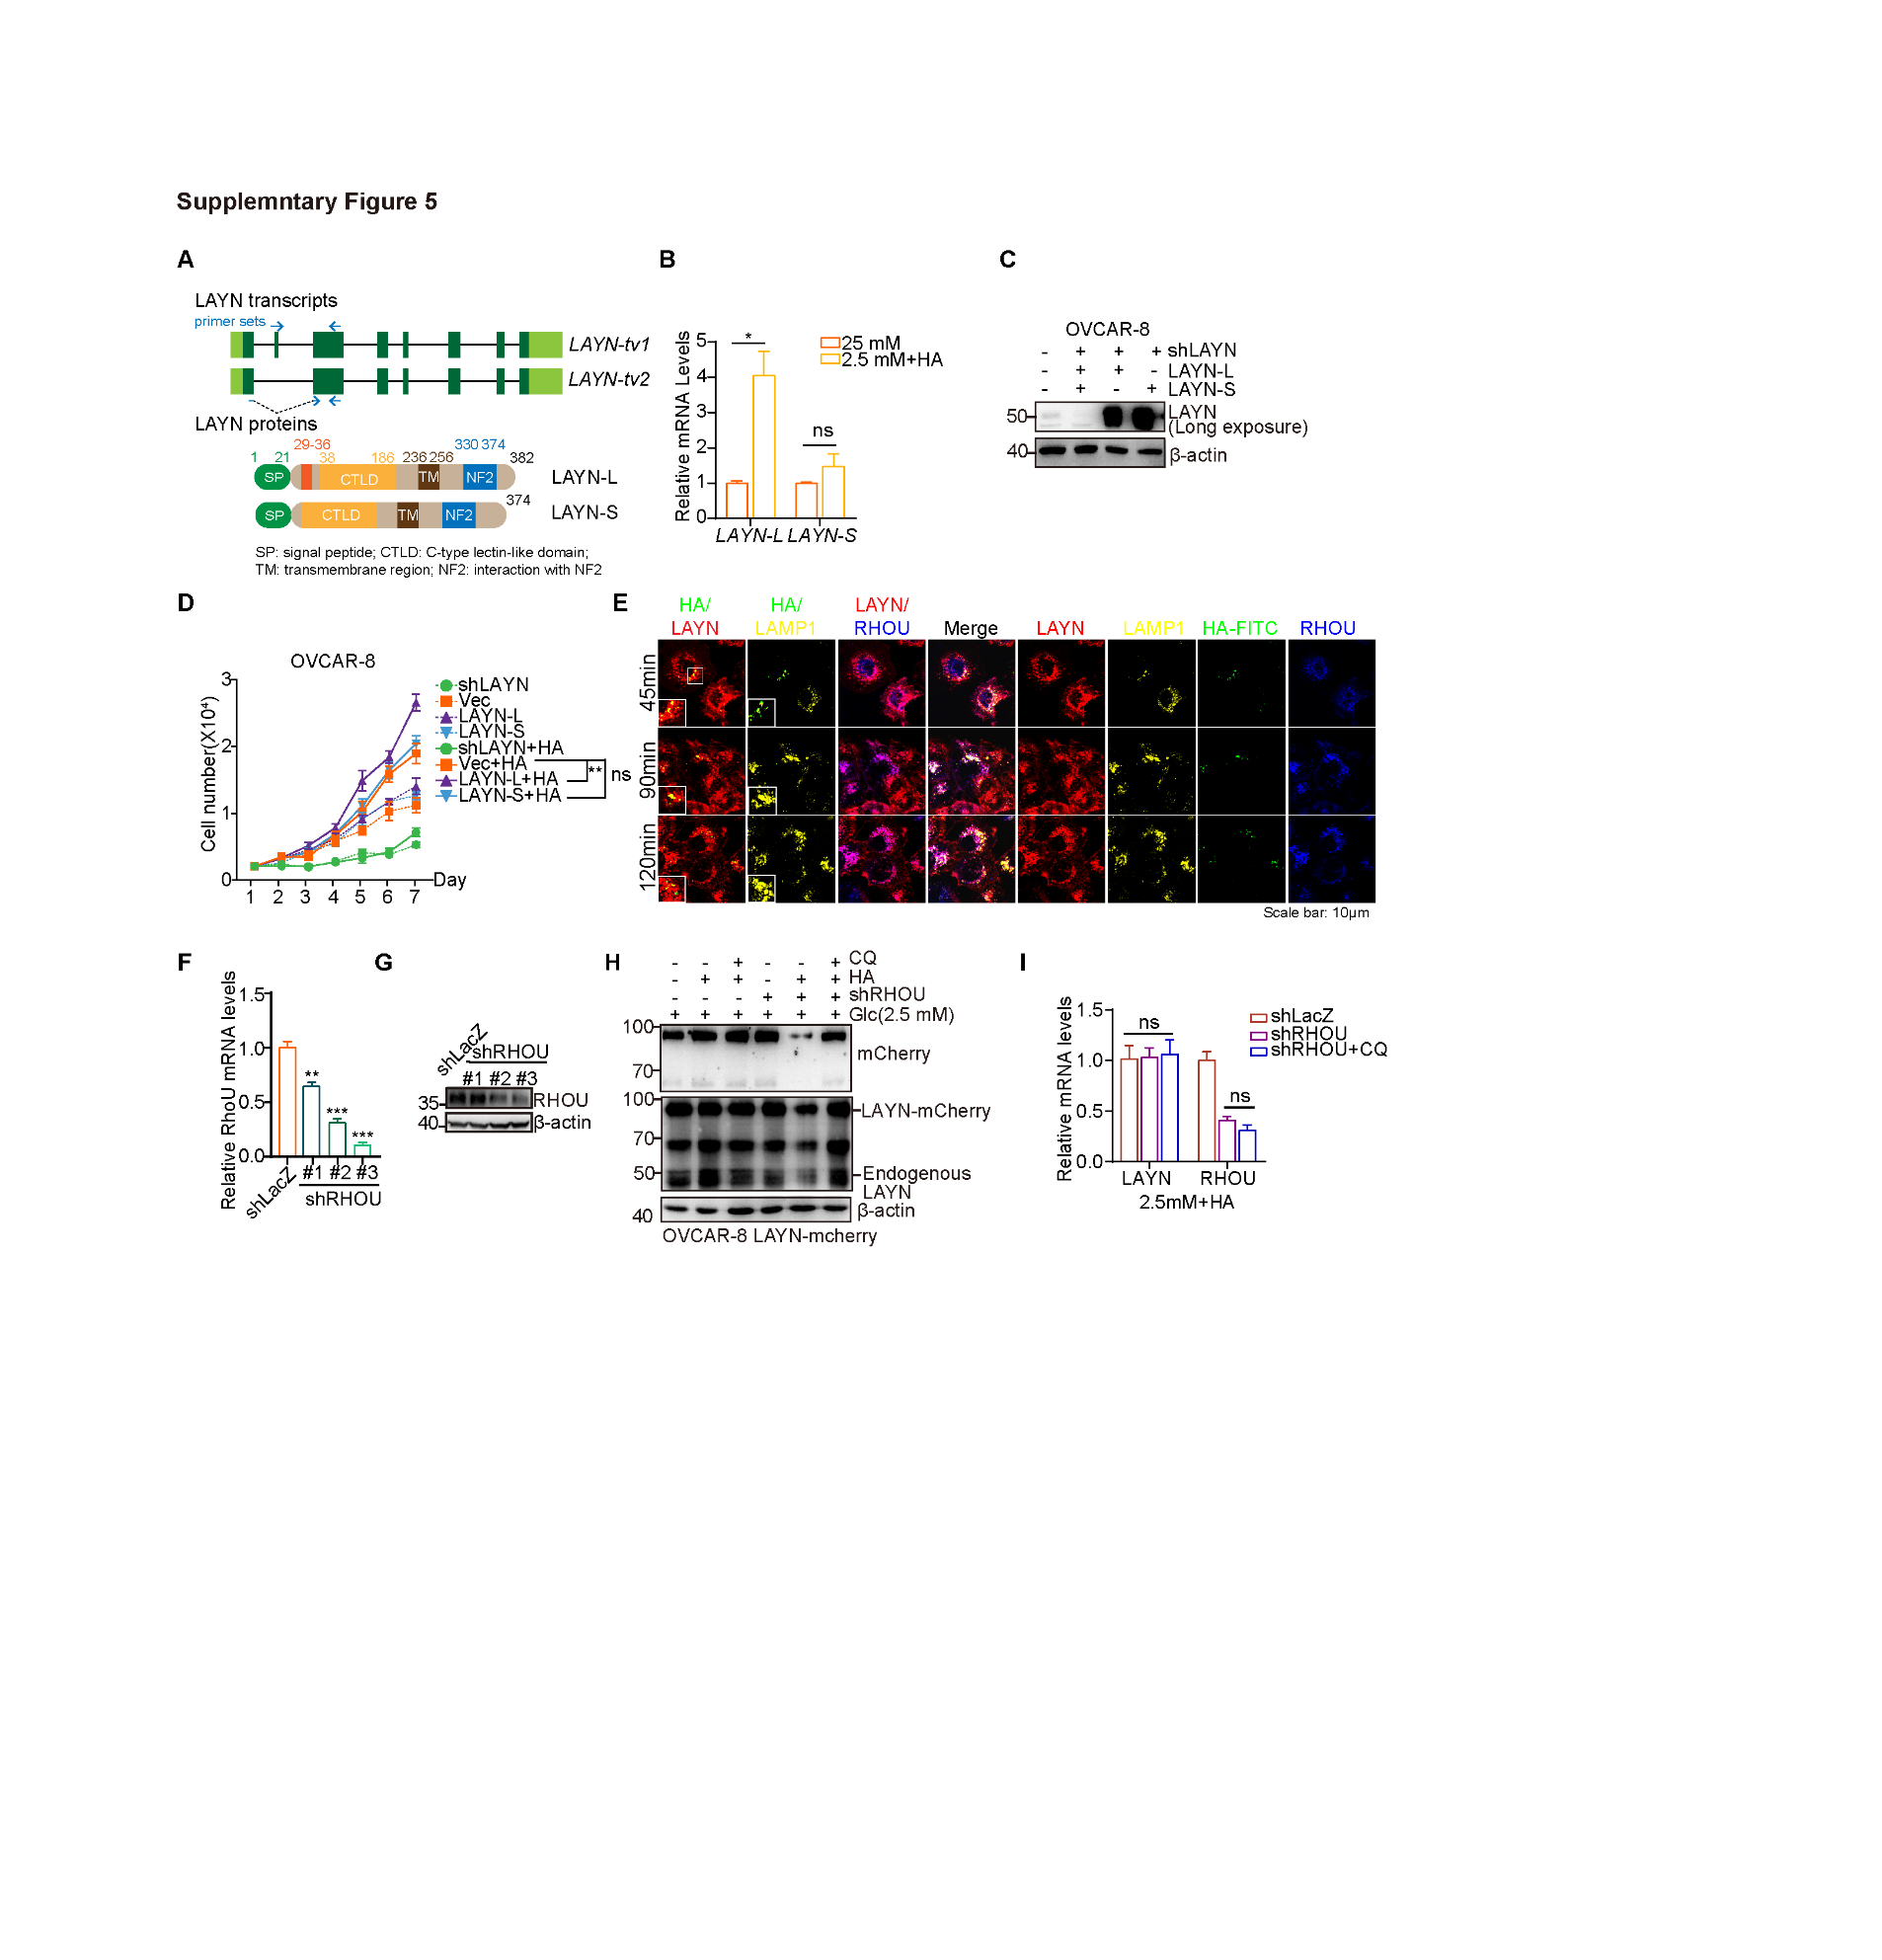


**Supplementary Figure 5. The long isoform of LAYN is responsible for the uptake of HA and is recycled in RHOU-dependent manner.**

**A** Schematic diagram of *LAYN* transcript variants (tv) and the domain structures of LAYN protein isoforms. **B** RT-qPCR analysis of *LAYN* transcript variants in OVCAR-8 cells under HA replenishment with low glucose (means ± SEM, n=3, *p < 0.05, ns not significant, by unpaired Student’s t-test). **C** Western blot analysis of OVCAR-8 cells with endogenous LAYN replaced by ectopically expressed isoforms. **D** The proliferation curves of indicated OVCAR-8 cells cultured in low glucose medium supplemented with (solid lines) or without (dash lines) HA. **E** Time-course immunofluorescence images of OVCAR-8 cells expressing LAYN-mCherry(red), RHOU-BFP (blue), and LAMP1-EYFP (yellow) following HA-FITC (green) replenishment overnight in low glucose medium. Magnified views of the lysosomal accumulation of HA-FITC are shown in the white boxes. **F, G** RT-qPCR analysis (**F**) and western blot assay (**G**) of *RHOU* mRNA levels in OVCAR-8 cells expressing shRNAs targeting RHOU. The qPCR quantification bar graph is shown as means ± SEM from three independent experiments (***p < 0.001, **p < 0.01, by unpaired Student's t-test). **H** Western blot analysis of LAYN and RHOU protein levels in OVCAR-8 cells cultured in low glucose medium supplemented with or without HA and treated with or without CQ. **I** RT-qPCR analysis of LAYN and RHOU mRNA levels in HA replenishmeed and low glucose medium, with or without CQ treatment (means ± SEM from three independent experiments, ns not significant, by unpaired Student’s t-test).


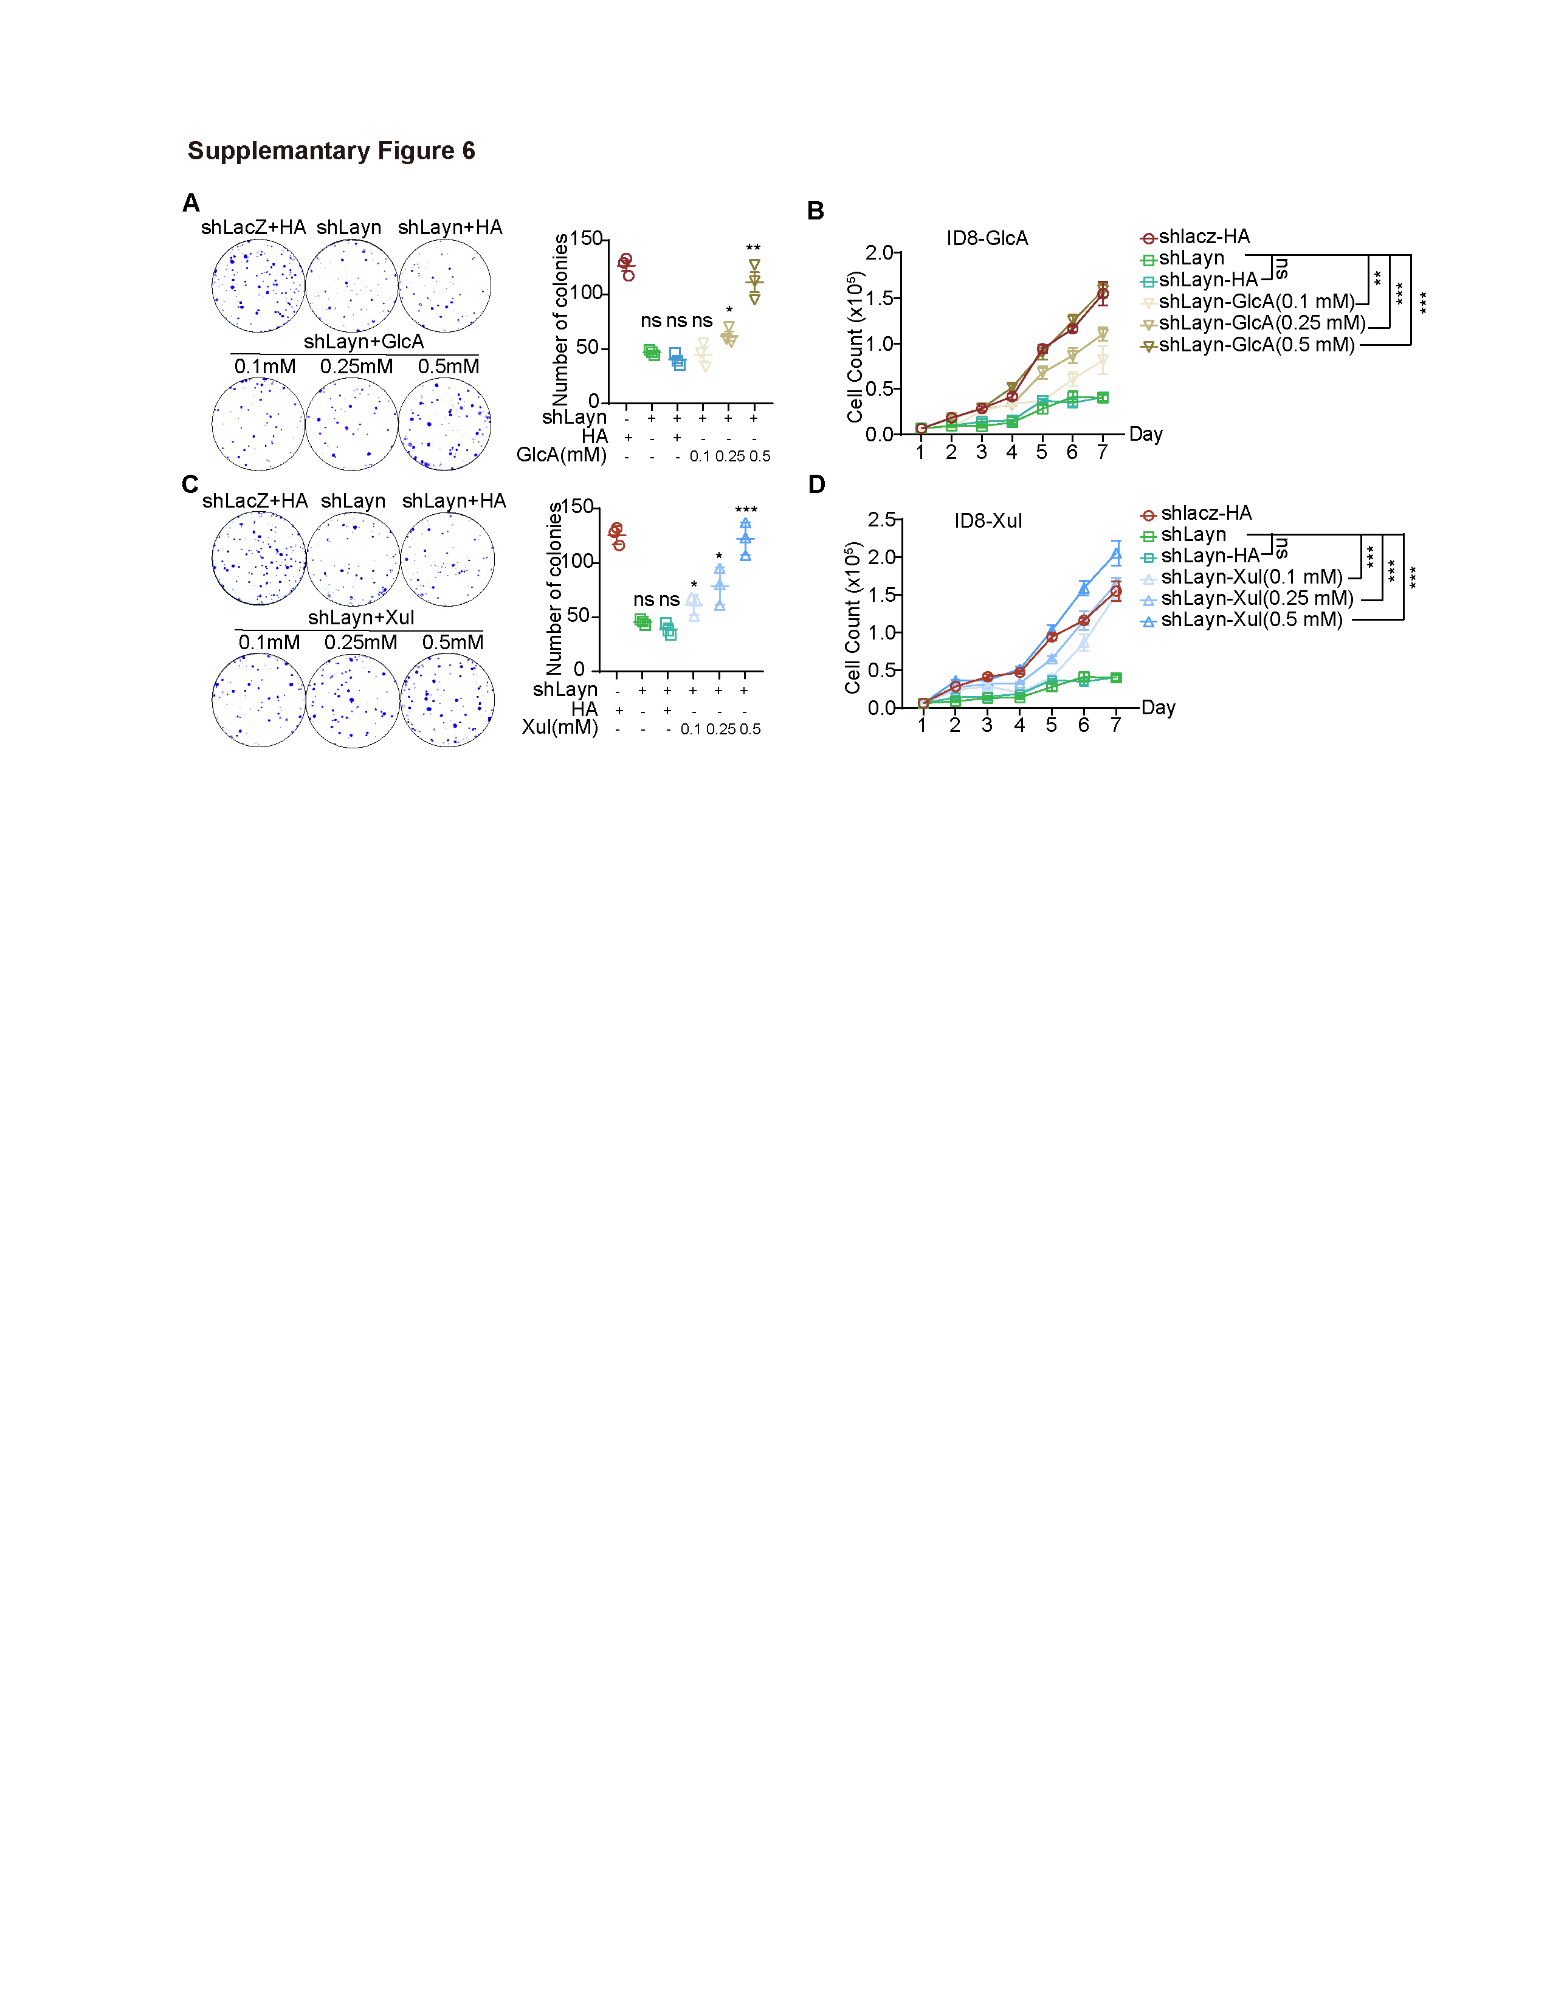


**Supplementary Figure 6. GlcA pathway metabolites restore HA-dependent proliferation of LAYN-silenced ID8 cells**

**A-D** The colony formation assays (**A, C**) and the growth curves (**B, D**) of ID8 shLAYN cells under HA supplementation and low glucose conditions with different concentration GlcA (**A, B**) or Xul (**C, D**) supplementation. ID8 shLacZ cells supplemented with HA as positive control. Data are shown as means ± SEM from three independent experiments, ***p < 0.001, **p < 0.01, ns not significant, the quantification of colony formation assays were analyzed by unpaired Student’s t-test and the quantification of growth curves were analyzed was two-way ANOVA test.


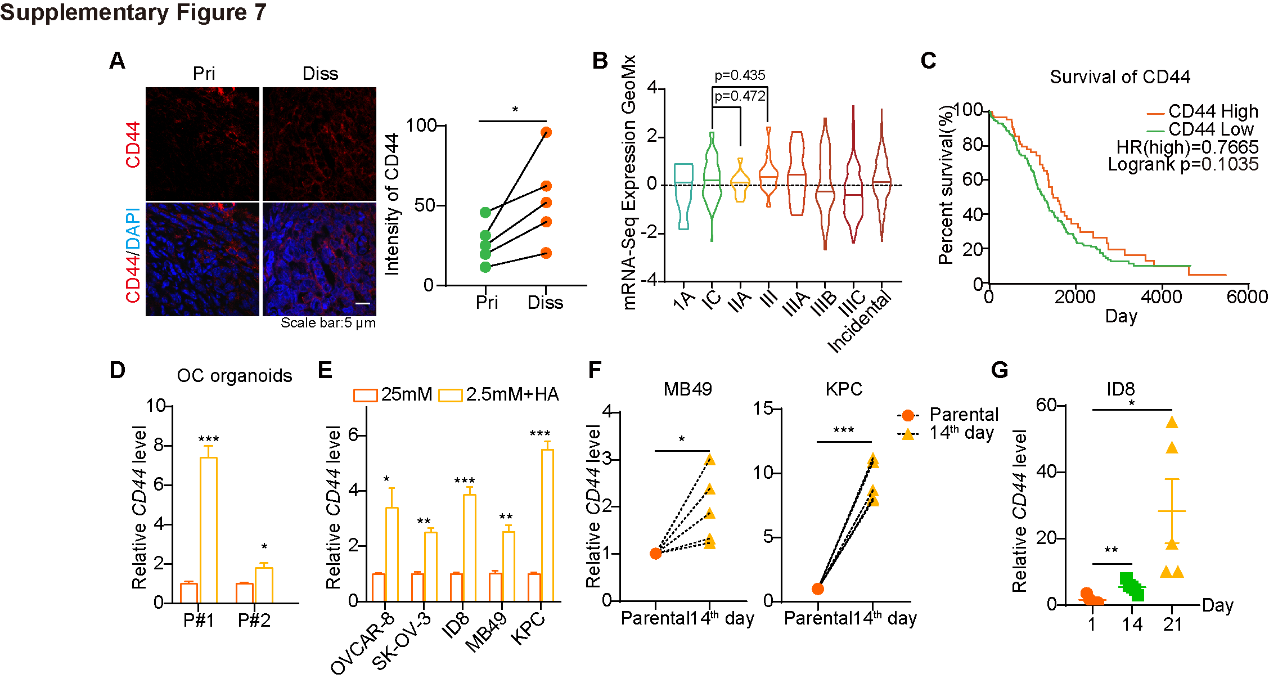


**Supplementary Figure 7. CD44 expression is induced in peritoneal disseminated OC cells.**

**A** Representative images of immunofluorescent staining for CD44 in primary and disseminated tumor tissues from OC patient, along with intensity quantification results (n=5, *p < 0.05, by paired Student’s t-test). **B** Expression patterns of *CD44* across different stages of OC. **C** Thesurvival curve to show the overall survival of OC patients with different *CD44* expression from the TCGA database (n=349). **D, E** The RT-qPCR analysis of *CD44* in patients derived-organoids (**D**) and multiple cell lines (**E**) under HA replenishment and low glucose conditions. Data are shown as means ± SEM from 3 independent experiments, ***p < 0.001, **p < 0.01, *p < 0.05, ns not significant, by unpair Student’s t-test. **F, G** The RT-qPCR analyses of *CD44* in multiple cancer cells isolated from early peritoneal dissemination in mice. Data are shown as means ± SEM from 5 biological replicates, ***p < 0.001, **p < 0.01, *p < 0.05, ns not significant, by unpair Student’s t-test.


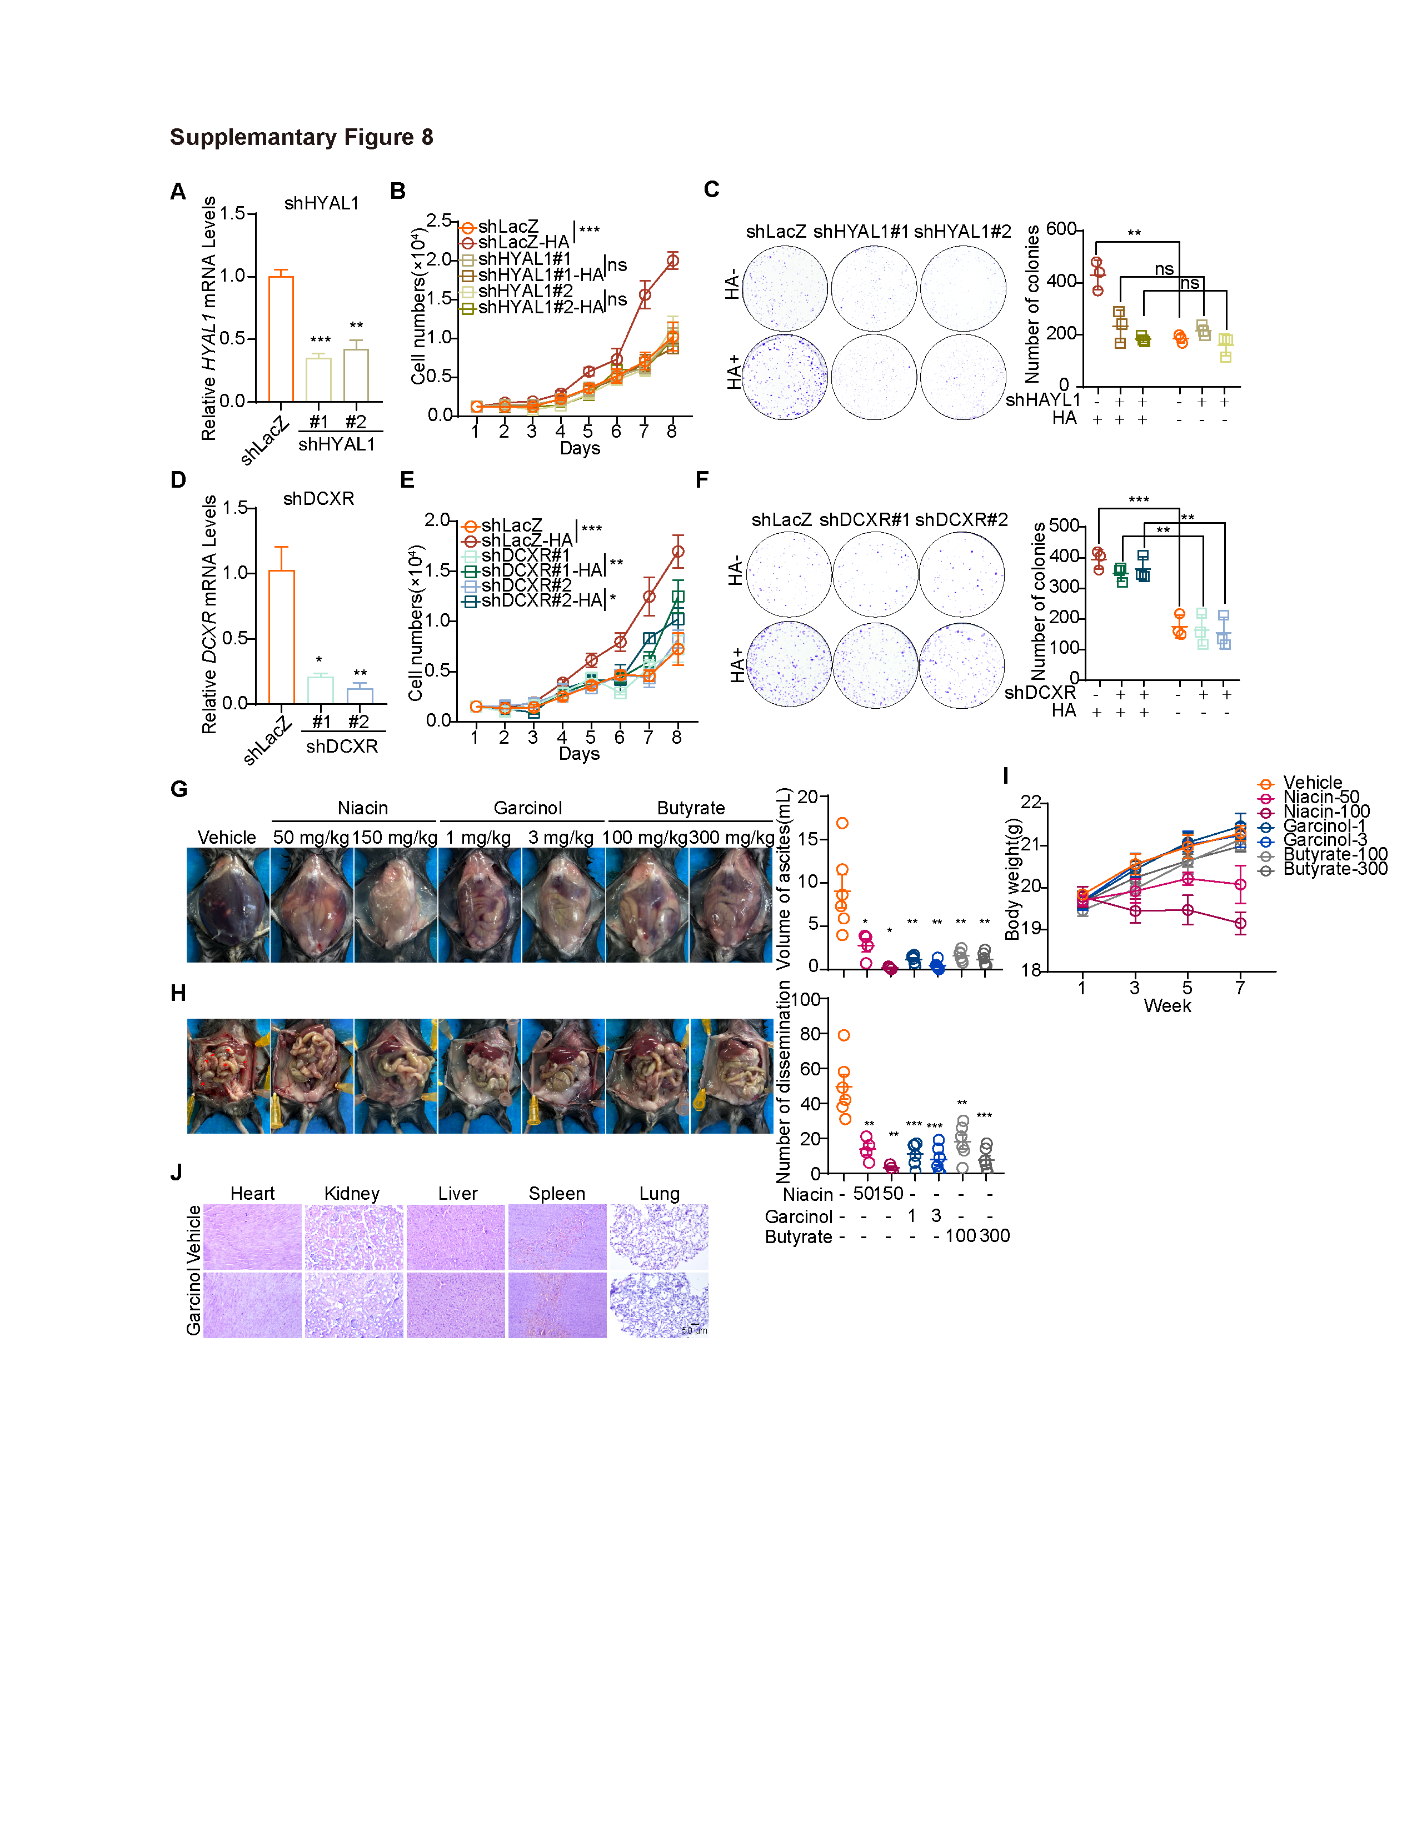


**Supplementary Figure 8. Blocking key HA cataboslism and GlcA pathway enzymes by shRNAs or inhibitors impair HA-sustained OC proliferation and dissemination.**

**A** RT-qPCR analysis of knockdown efficiency of shRNAs against *HYAL1* in OVCAR-8 cells. **B, C** The proliferation curves (**B**) and colony formation assay (**C**) of HYAL1-silenced OVCAR-8 cells in low glucose medium supplemented with or without HA. **D** RT-qPCR analysis of knockdown efficiency of shRNAs against *DCXR* in OVCAR-8 cells. **E**, **F** The proliferation curves (**E**) and colony formation assay (**F**) of HYAL1-silenced OVCAR-8 cells in low glucose medium supplemented with or without HA. **G, H** Representative images of the formation of malignant ascites(**G**) and metastatic nodules(**H**) in the experimental dissemination mouse model of OC treated with HYAL1/DCXR inhibitors (means ± SEM from three independent experiments, ***p < 0.001, **p < 0.01, *p < 0.05, by unpair student’s t-test). **I** Body weight curves of mice during the treatment of HYAL1/DCXR inhibitors. **J** Histological examination of the vital organs with different drug treatments. All the PCR, cell proliferation and colony formation assay results were from three independent experiments and are represented as means ± SEM (***p < 0.001, **p < 0.01, *p < 0.05, ns not significant, by unpair student’s t-test for qPCR and colony formation assay and two-way ANOVA test for proliferation curve analysis).
