# Supplementary material for: Hyaluronan catabolism supports the peritoneal disseminated metastasis of cancer through the glucuronic acid pathway
Source: Research Square preprint supplement (doi:10.21203/rs.3.rs-7691213/v1), 2025-11-19
Supplement: Supplementary file 3 [file 4c513087c999b1b5a0c65e5d.xlsx]

## Sheet: The sequences of primers
Supplementary Table 5. The sequences of primers
The sequences of the shRNA for related genes (sequences (5' to 3')	CD44	sh#1:AAAAGCAGCACTTCAGGAGGTTACATTGGATCCAATGTAACCTCCTGAAGTGCTGC
		sh#3:AAAAGCTTTGATTCTTGCAGTTTGCTTGGATCCAAGCAAACTGCAAGAATCAAAGC
	Cd44	sh#1:AAAA CCTTTCAATAACCATGAGTAT TTGGATCCAA ATACTCATGGTTATTGAAAGG
		sh#2:AAAAGATACCTTCATGTCCATAT TTGGATCCAA ATATGGACATGAAGGTATC
	LAYN	sh#1:AAAA CGGTGCAACATGAAGAACAAT TTGGATCCAA ATTGTTCTTCATGTTGCACCG
		sh#2:AAAA GATGGCAGCATATCACAATTTAAGGATCCTT AAATTGTGATATGCTGCCATC
	Layn	sh#1:AAAAGGGACAGCTCGTCAGCATTGATTGGATCCAATCAATGCTGACGAGCTGTCCC
		sh#2:AAAAGGAATGATGACCGGTGCAACATTCGTGTTGCACCGGTCATCATTCC
	HYAL1	sh#1:AAAAGCTACAACTATGACTTTCTAA TTGGATCCAA ttagaaagtcatagttgtagc
		sh#2:AAAACTTCCTGACCTTACTCGATAT TTGGATCCAA atatcgagtaaggtcaggaag
	CRYL1	sh#3:AAAAGCTTCCAGGTGAAACTCTATGTTGGATCCAACATAGAGTTTCACCTGGAAGC
		sh#4:AAAAGCCTGCAATATGCAATCATCATTGGATCCAATGATGATTGCATATTGCAGGC
	Cryl1	sh#1:AAAAGCTTCAAGGTGAAACTCTATGTTGGATCCAACATAGAGTTTCACCTTGAAGC
		sh#2:AAAAGGAGACTATGCACCTCAATGCTTGGATCCAAGCATTGAGGTGCATAGTCTCC
	DCXR	sh#1:AAAACCAAGACTATGCTGAACCGAA TTGGATCCAA ttcggttcagcatagtcttgg
		sh#2:AAAAGATCCGAGTGAATGCAGTAAA TTGGATCCAA tttactgcattcactcggatc
	RhoU	sh#2:AAAACTGCTACACCAACACAGACAT TTGGATCCAA ATGTCTGTGTTGGTGTAGCAG
		sh#3:AAAAGCTACAGCCAAAGAAGTCTAA TTGGATCCAA TTAGACTTCTTTGGCTGTAGC
The sequences of the primers for cloning (sequences (5' to 3')	LAYN(V5 tagged)	Forward:ggatccatgaggccgggaaccg
		Reverse:ggctagcctacgtagaatcgagaccgaggagagggttagggataggcttacccgtagaatcgagaccgagga
	Layn(V5 tagged)	Forward:ggatccatgcagccgggagcag
		Reverse:gctagcttacgtagaatcgagaccgaggagagggttagggataggcttaccgtaatatatttcat
	LAYN-promoter	Forward:ggtacc ggctatcaaagcctaaactatta
		Reverse: ctcgag tggtcgatgcagagaacaaacac
	LAYN-promoter-mutant	Forward:Gtgttagatgtgacatttctaac
		Reverse:tgtcccagttagaaatgtcaca
	Hyal1(Flag tagged)	Forward:tca tctaga atgaagcccttcagtcctga
		Reverse:ggatcc tca cttgtcgtcatcgtctttgtagtc cataccccgcttgtcacac
	HYAL1-promoter	Forward:ggtacc ggacttgctggtgacacag
		Reverse:ctcgag tgctcacttcctagatggga
	HYAL1-promoter-mutant	Forward:aggctggagtgcagtctcggct
		Reverse:tgtagcgagccgaga ctgcactc
	Cryl1(HA tagged)	Forward:tca tctaga atggcgtccccagcagcG
		Reverse:ggatcc tcaagcgtagtctgggacgtcgtatgggta cttgggctgcatctggtacttc a
	RhoU(Flag tagged)	Forward:tctaga atgcccccgcagcaggggga
		Reverse:Gctagc tca cttgtcgtcatcgtctttgtagtctacgaaacagcagtacttcttcca
	LAYN-Short (from LAYN)	Forward:CTGCTGAGT GGGCAGCCAGTC
		Reverse:TGGcTGCC C actcag c ag
The sequences of the qPCR primers (sequences (5' to 3')	CD44	Forward:ATGGGACGAGGTCATCAAGC
		Reverse:AGGTCCTGCTTTCCTTCGTG
	LAYN	Forward:TGGACCTCAGAGGAGGGCAG
		Reverse:GCTGCCATCAGTCCAAGCAT
	Layn	Forward:GGACTTGGACCCCAGAGGA
		Reverse:GTCCTGGCAGGCTGTGTTAT
	HYAL1	Forward:ATCTGCGCCCTCTTCCTGAC
		Reverse:GGGCAATCAGGCTGGCATTC
	Hyal1	Forward:GCAGCTCTTTTGTGCAGCGA
		Reverse:TACCCCGCTTGTCACACCAC
	HYAL2	Forward:CGGACTCCCACACAGTTCC
		Reverse:GTGAGGCCTGCACATCAAAG
	Hyal2	Forward:CATACACCCGAGGACTCACG
		Reverse:AGGTGCAGGAAGGTATTGGC
	HYAL3	Forward:AACGTTGTCGGACCGAGGAG
		Reverse:GCCACGGTTGGCTATGATGC
	Hyal3	Forward:AAGTGCTGGCGTCTCCATGA
		Reverse:GGTTTAGGCTCCAGGCAGGT
	AKR1A1	Forward:CTGCCTCATTGTGCCCAGGA
		Reverse:TAAAGGATCACGCGCAGGGT
	Akr1a1	Forward:TGGTCAGGTGAAAGCAGCCA
		Reverse:GGGATTGTCTCCCCGCTCAA
	CRYL1	Forward:AGTTGTTTGCTGGCTTGGTCCAT
		Reverse:TGCCCAACCCTTCTGACATGA
	Cryl1	Forward:AGCTGGACCGCATTGTGGAT
		Reverse:GTGGGGCACTAGCTCAACCA
	SORD	Forward:ACCAGGTGATCGTGTTGCCA
		Reverse:CCCAGCTCCACACACAAGGA
	Sord	Forward:GCTGGGTGAGGCTGCTGATA
		Reverse:GCTCAGGTCTGGGCCATGAT
	DCXR	Forward:TAGAGCACGTGGTGAACGCC
		Reverse:AATAGCACATAGTCTGGGCAGC
	Dcxr	Forward:GGGCTGTCATCCAGGTGTCT
		Reverse:CCCAAGCTCTAGGGCCATCAT
	XYLB	Forward:CTGGGCTGGGACTTCAGCAC
		Reverse:GAGAAGTGACCGTCAGCCCA
	Xylb	Forward:GCAGTACACATGGACGCACG
		Reverse:ACACCGCCCTGAGTTCCAAA
	RhoU	Forward:TCCCTACTGCCTTCGACAAC
		Reverse:ACAGTGGCATCGAATCTCCG
	LAYN-Long	Forward:CTGAGTGCCTCGGATTTGGAC
		Reverse:GCCCAATCCAGAAGTCACCA
	LAYN-Short	Forward:GTCGCCTGCTGAGTGGGCA
		Reverse:GCCCAATCCAGAAGTCACCA
	GAPDHS	Forward: GTCCTCACCAATGTCACCGT
		Reverse: ACCGATGCGTCCAAATCCAT
	Gapdhs	Forward: GGATTTGGACGCATTGGTCG
		Reverse: AGGGTCTTTGCACTGGTACG
	LDHB	Forward: TGGCGTGTGCTATCAGCATT
		Reverse: CGACTCTCCCCTTCTTGCTG
	Ldhb	Forward: TTCTGCTCGATTCCGCTACC
		Reverse: CTTCATAGGCACTGTCCACCA
	LDHD	Forward: CTCACCTTGTGTGTCCCTGG
		Reverse: AGGAACTCAATGCGGGCTAC
	Ldhd	Forward: TCAATACCCACCTGCGTGAC
		Reverse: ACTCTTCCTGTAATGGCGGC
	PRPS2	Forward: GTTCAGCAACCAGGAGACCA
		Reverse: AATTGGGGCACGACTCTCTC
	Prps2	Forward: TTTAGCAACCAGGAGACCAGTG
		Reverse: AGAAATTGGAGCACGACTCTCG
	ACTIN	Forward:CGTCACCAACTGGGACGA
		Reverse:ATGGGGGAGGGCATACC
	Actin	Forward:GGCTGTATTCCCCTCCATCG
		Reverse:GCACAGGGTGCTCCTCAG
