# Supplementary material for: Hyaluronan catabolism supports the peritoneal disseminated metastasis of cancer through the glucuronic acid pathway
Source: Research Square preprint supplement (doi:10.21203/rs.3.rs-7691213/v1), 2025-11-19
Supplement: Supplementary file 4 [file 7acb73bc2dfb0b5f2a40a496.xlsx]

## Sheet: Sheet1
Supplementary Table 4. Blood biochemical parameters of mice treated with Garcinol
	Vehicle	Garnicol	Reference Value
TP (g/L)	59.65±8.05	52.65±6.45	36-66
ALB (g/L)	33.85±3.25	30.7±5.8	25-48
GLO (g/L)	29.75±8.95	18.15±8.25	5-40
TBIL (μmol/L)	3.16±1.11	4.02±0.94	1.7-15.4
ALT (U/L)	47±19	79.5±37.5	28-132
AST (U/L)	174±43	177.5±24.5	59-247
GGT (U/L)	1±0.9	1±0.2	0-15
ALP (U/L)	133±35	137.5±13.5	62-209
TBA (μmol/L)	6.88±1.51	5.88±2.13	0-15
CK (U/L)	1282.5±120.5	984±100	68-1070
AMY (U/L)	1155±201	983±99	200-2500
TG (mmol/L)	1.18±0.33	1.015±0.235	0.62-1.63
CHOL (mmol/L)	4.335±0.615	3.66±0.76	0.93-2.48
GLC (mmol/L)	12.25±1.81	14.245±3.535	3.49-10.67
CRE (μmol/L)	56±29	60.5±26.5	26-88
BUN (mmol/L)	10.445±2.655	9.02±4.68	4.9-10.4
