# Supplementary material for: Hyaluronan catabolism supports the peritoneal disseminated metastasis of cancer through the glucuronic acid pathway
Source: Research Square preprint supplement (doi:10.21203/rs.3.rs-7691213/v1), 2025-11-19
Supplement: Supplementary file 5 [file 95bc811b0d47d345d1da4898.xlsx]

## Sheet: Sheet1
Supplementary Table 2. TCGA data of enriched genes in OC patients
Sample*	Description	LAYN (TPM)	HYAL1 (TPM)	AKR1A1 (TPM)	CRYL1 (TPM)
TCGA-04-1331-01A	78 years, female, white, stage:Stage IIIC, dead, 1336 days	3.5	2.5	87.6	3.9
TCGA-04-1332-01A	70 years, female, white, stage:Stage IIIC, dead, 1247 days	6.9	5	52.9	4
TCGA-04-1338-01A	78 years, female, white, stage:Stage IIIC, alive, 1418 days	2.9	0.9	35	2.1
TCGA-04-1341-01A	85 years, female, white, stage:'--, alive, 33 days	3.4	0.6	36	12.3
TCGA-04-1343-01A	72 years, female, white, stage:Stage IV, dead, 361 days	8.7	1.1	74.2	4.6
TCGA-04-1347-01A	81 years, female, white, stage:Stage IV, alive, 1919 days	1.9	0.3	49.6	1.8
TCGA-04-1350-01A	46 years, female, white, stage:Stage IIIC, dead, 1946 days	7.2	0.5	41.2	15.7
TCGA-04-1356-01A	62 years, female, white, stage:Stage IIC, dead, 1499 days	6.9	1	46.4	7.4
TCGA-04-1361-01A	57 years, female, white, stage:Stage IIIB, alive, 989 days	6.6	1.6	54.2	4.9
TCGA-04-1362-01A	59 years, female, white, stage:Stage IIC, dead, 1348 days	8.4	2.5	61.4	14.5
TCGA-04-1364-01A	61 years, female, white, stage:Stage IIIC, dead, 1024 days	13.1	2.5	55.3	10.4
TCGA-04-1365-01A	87 years, female, white, stage:Stage IIIB, alive, 947 days	3.4	1	54.7	9.8
TCGA-04-1514-01A	45 years, female, white, stage:Stage IIIA, dead, 1720 days	7.7	2.3	68.9	15.8
TCGA-04-1519-01A	48 years, female, stage:Stage IIIC, alive, 24 days	11.2	2	60.6	8.3
TCGA-04-1530-01A	68 years, female, white, stage:Stage IIIC, dead, 3622 days	3.1	1.4	67.5	2.5
TCGA-04-1536-01A	60 years, female, black or african american, stage:Stage IV, dead, 885 days	1.5	0.3	114.7	7.6
TCGA-04-1542-01A	52 years, female, white, stage:Stage IIIB, dead, 2561 days	4.1	0.5	33.9	2
TCGA-04-1648-01A	57 years, female, white, stage:Stage IIIC, dead, 871 days	3.2	1.3	74.3	7.3
TCGA-04-1651-01A	53 years, female, white, stage:Stage IIIC, dead, 1102 days	0.6	2.2	31	5.1
TCGA-04-1655-01A	49 years, female, white, stage:Stage IIIB, dead, 1380 days	6.2	1.1	46.8	3
TCGA-09-0364-01A	80 years, female, white, stage:Stage IIC, dead, 887 days	8.4	2	50.2	7.7
TCGA-09-0366-01A	55 years, female, white, stage:Stage IIIC, dead, 1757 days	0.9	2	110.5	16.8
TCGA-09-0367-01A	67 years, female, native hawaiian or other pacific islander, stage:Stage IIIC, dead, 547 days	2.4	0.1	58.1	9.1
TCGA-09-0369-01A	56 years, female, white, stage:Stage IIIC, dead, 1082 days	9.3	1.5	75.6	7.1
TCGA-09-1662-01A	58 years, female, white, stage:Stage IV, dead, 2717 days	6.3	1	81.4	12.9
TCGA-09-1666-01A	57 years, female, white, stage:Stage IIIC, alive, 1752 days	6	0.9	76.9	22.7
TCGA-09-1669-01A	54 years, female, white, stage:Stage IIIA, alive, 928 days	12.1	0.5	47.4	17.8
TCGA-09-1670-01A	57 years, female, white, stage:Stage IIIA, alive, 547 days	4.7	1.2	85.6	7.4
TCGA-09-1673-01A	50 years, female, white, stage:Stage IV, alive, 92 days	10.9	2.4	94.3	4.2
TCGA-09-2045-01A	50 years, female, asian, stage:Stage IV, dead, 1069 days	1.8	1.3	57.1	16.5
TCGA-09-2048-01A	63 years, female, white, stage:Stage IIIC, dead, 138 days	12.3	0.9	59.5	12.7
TCGA-09-2051-01A	42 years, female, white, stage:Stage IIIC, alive, 1919 days	2.6	0.7	94.2	15.8
TCGA-09-2054-01A	58 years, female, black or african american, stage:Stage IIIC, dead, 637 days	8.7	1.5	61	12.8
TCGA-10-0927-01A	65 years, female, stage:Stage IIIC, dead, 2490 days	12.8	1.3	42.5	0.3
TCGA-10-0928-01A	71 years, female, white, stage:Stage IIIC, dead, 563 days	10.5	4	55.3	7.1
TCGA-10-0931-01A	44 years, female, white, stage:Stage IIIC, dead, 1000 days	2.4	0.3	123.4	5.7
TCGA-10-0933-01A	77 years, female, white, stage:Stage IIIC, dead, 446 days	3.2	0.9	16.2	2.7
TCGA-10-0937-01A	44 years, female, white, stage:Stage IIIC, dead, 608 days	2.7	0.3	51.6	4.6
TCGA-10-0938-01A	80 years, female, white, stage:Stage IIIC, dead, 636 days	2.5	0.6	64.4	3.2
TCGA-13-0714-01A	55 years, female, white, stage:Stage IV, dead, 189 days	1.9	0.4	54.6	1.7
TCGA-13-0720-01A	48 years, female, white, stage:Stage IIIC, dead, 1355 days	3.2	0.6	97.1	7.1
TCGA-13-0724-01A	72 years, female, white, stage:Stage IV, dead, 83 days	2.5	1.3	62.3	0.4
TCGA-13-0725-01A	44 years, female, white, stage:Stage IIIC, dead, 377 days	4.8	1.6	71.7	17.8
TCGA-13-0726-01A	55 years, female, white, stage:Stage IIIC, dead, 949 days	9.1	0.9	93.6	6.8
TCGA-13-0727-01A	71 years, female, white, stage:Stage IIIC, dead, 462 days	19	0.5	59.3	9.7
TCGA-13-0730-01A	71 years, female, white, stage:Stage IIIC, dead, 542 days	12.1	0.3	65.7	17.3
TCGA-13-0762-01A	65 years, female, white, stage:Stage IIIC, alive, 3400 days	0.7	1	76.2	1
TCGA-13-0765-01A	50 years, female, white, stage:Stage IIIC, dead, 1389 days	32.2	0.7	84.4	10
TCGA-13-0766-01A	42 years, female, white, stage:Stage IIIC, dead, 1725 days	4	0.3	27.4	8.3
TCGA-13-0768-01A	73 years, female, white, stage:Stage IIIC, dead, 1784 days	6.6	1.4	57.9	5.1
TCGA-13-0795-01A	66 years, female, white, stage:Stage IIIC, dead, 619 days	5.6	0.6	52.7	3.8
TCGA-13-0797-01A	49 years, female, white, stage:Stage IIIC, alive, 2121 days	1.5	1.2	89.7	4.8
TCGA-13-0800-01A	52 years, female, white, stage:Stage IIIC, alive, 2661 days	5.7	1.3	37.6	6.6
TCGA-13-0804-01A	73 years, female, white, stage:Stage IIIC, dead, 1073 days	1.1	1.5	61.8	6.3
TCGA-13-0883-01A	61 years, female, white, stage:Stage IIIC, dead, 2097 days	27.8	1	61.9	22
TCGA-13-0885-01A	70 years, female, white, stage:Stage IIIC, alive, 3388 days	0.8	0.4	46.5	1
TCGA-13-0886-01A	67 years, female, white, stage:Stage IIIC, alive, 4665 days	3.3	0.8	47.1	5.8
TCGA-13-0887-01A	42 years, female, white, stage:Stage IIIC, dead, 2028 days	2	0.9	67.7	9.2
TCGA-13-0888-01A	78 years, female, white, stage:Stage IIIC, dead, 2811 days	5.3	0.4	33.7	2.1
TCGA-13-0891-01A	73 years, female, white, stage:Stage IV, dead, 3128 days	3.3	1.8	49.4	10.6
TCGA-13-0897-01A	54 years, female, white, stage:Stage IIIC, dead, 2182 days	5.8	1.3	110.4	10.2
TCGA-13-0906-01A	50 years, female, white, stage:Stage IIIC, alive, 3619 days	7.8	0.5	40.9	7.3
TCGA-13-0911-01A	55 years, female, white, stage:Stage IV, dead, 1355 days	5.9	1.8	95	9.5
TCGA-13-0916-01A	49 years, female, white, stage:Stage IIIC, alive, 1785 days	25.9	2.6	150.8	11.8
TCGA-13-0920-01A	65 years, female, white, stage:Stage IIIC, dead, 1484 days	2.9	0.5	97.7	8.2
TCGA-13-0923-01A	74 years, female, white, stage:Stage IIIC, alive, 2547 days	2.4	0.3	60.1	8.5
TCGA-13-0924-01A	45 years, female, white, stage:Stage IV, alive, 2614 days	5.7	2.1	73.1	6.9
TCGA-13-1403-01A	48 years, female, white, stage:Stage IIIC, dead, 2345 days	5.4	3.5	61.5	5.4
TCGA-13-1404-01A	48 years, female, white, stage:Stage IIIC, alive, 2469 days	3.3	0.4	49.8	5
TCGA-13-1405-01A	49 years, female, white, stage:Stage IV, dead, 868 days	14.1	1.8	99.4	6
TCGA-13-1407-01A	51 years, female, white, stage:Stage IIIC, alive, 2534 days	6	0.6	47.3	3
TCGA-13-1408-01A	59 years, female, white, stage:Stage IIIC, dead, 1680 days	5.6	1.2	51.7	7.7
TCGA-13-1409-01A	73 years, female, white, stage:Stage IIIC, dead, 1742 days	2.6	1.1	25.4	2.2
TCGA-13-1410-01A	57 years, female, white, stage:Stage IV, alive, 2464 days	6.2	0.9	78.2	8.8
TCGA-13-1411-01A	81 years, female, white, stage:Stage IIIC, dead, 531 days	3.3	0.8	83.5	9
TCGA-13-1477-01A	49 years, female, white, stage:Stage IV, dead, 1662 days	2.3	0.4	25.7	3.7
TCGA-13-1483-01A	61 years, female, white, stage:Stage IIIC, dead, 895 days	1.8	0.5	85	2.6
TCGA-13-1485-01A	48 years, female, white, stage:Stage IV, dead, 629 days	19.1	1.4	84.2	12.3
TCGA-13-1487-01A	74 years, female, white, stage:Stage IV, dead, 681 days	5.8	0.2	58.3	6.4
TCGA-13-1488-01A	59 years, female, white, stage:Stage IV, dead, 2154 days	2.4	2.2	45.7	2.8
TCGA-13-1489-01A	70 years, female, white, stage:Stage IIIC, dead, 2553 days	7.4	0.4	34.9	4.1
TCGA-13-1492-01A	66 years, female, white, stage:Stage IIIC, dead, 3819 days	0.1	1.8	73.1	3.7
TCGA-13-1495-01A	60 years, female, white, stage:Stage IIIC, dead, 2749 days	1.4	0.5	60.4	5.6
TCGA-13-1496-01A	65 years, female, white, stage:Stage IIIC, dead, 129 days	1.7	0.4	42.7	5.3
TCGA-13-1497-01A	47 years, female, white, stage:Stage IIIC, alive, 3871 days	3.1	0.8	59.1	37.9
TCGA-13-1498-01A	73 years, female, white, stage:Stage IIIC, dead, 2012 days	6.3	0.4	72.7	8.7
TCGA-13-1499-01A	56 years, female, white, stage:Stage IIIC, alive, 3500 days	7.8	0.7	55.9	4.6
TCGA-13-1501-01A	50 years, female, white, stage:Stage IV, dead, 1314 days	1.4	0.2	34.5	2.2
TCGA-13-1505-01A	63 years, female, white, stage:Stage IIIC, alive, 1998 days	13	2.1	119.6	5
TCGA-13-1506-01A	45 years, female, white, stage:Stage IIIC, dead, 1039 days	9.2	0.9	64.8	11.5
TCGA-13-1507-01A	77 years, female, white, stage:Stage IIIC, dead, 1993 days	12.3	0.2	73.7	14.6
TCGA-13-1509-01A	64 years, female, white, stage:Stage IV, alive, 2438 days	8.4	0.5	28.2	14.7
TCGA-13-1510-01A	62 years, female, white, stage:Stage IIIC, dead, 1359 days	3.7	1.2	65.2	4.2
TCGA-13-1511-01A	52 years, female, asian, stage:Stage IV, dead, 1650 days	6.8	3.9	97.5	6.4
TCGA-13-1512-01A	49 years, female, white, stage:Stage IIIC, alive, 442 days	3.6	0.4	87.3	9.2
TCGA-13-2060-01A	51 years, female, white, stage:Stage IV, alive, 2369 days	5.1	0.7	46.5	5.3
TCGA-13-A5FT-01A	67 years, female, black or african american, stage:Stage IIIC, alive, 2143 days	1	0.7	66.9	2
TCGA-20-0987-01A	61 years, female, white, stage:Stage IIIC, dead, 701 days	0.9	0.9	151.5	6.4
TCGA-20-0991-01A	78 years, female, white, stage:Stage IIB, alive, 797 days	1.1	1.3	123.8	5
TCGA-20-1682-01A	56 years, female, white, stage:Stage IIIC, alive, 837 days	3.3	0.7	135.2	19.4
TCGA-20-1683-01A	65 years, female, white, stage:Stage IIIC, alive, 772 days	2.9	10.6	35.7	6.9
TCGA-20-1686-01A	75 years, female, white, stage:Stage IIIC, alive, 89 days	1.9	0.9	40.2	6.8
TCGA-20-1687-01A	46 years, female, white, stage:Stage IV, alive, 81 days	8.5	0.9	69.4	13
TCGA-23-1022-01A	67 years, female, white, stage:Stage IIIC, dead, 1511 days	0.6	0.2	51.1	8.6
TCGA-23-1023-01A	65 years, female, white, stage:Stage IIIC, alive, 1233 days	2.6	1.9	133.4	10.2
TCGA-23-1024-01A	52 years, female, white, stage:Stage IV, alive, 468 days	5.8	0.7	68.7	15.2
TCGA-23-1027-01A	48 years, female, white, stage:Stage IIIC, dead, 976 days	2.1	1	96.7	9.7
TCGA-23-1028-01A	43 years, female, white, stage:Stage IIIC, alive, 1503 days	7.6	0.9	46.1	5.9
TCGA-23-1030-01A	64 years, female, white, stage:Stage IIIC, alive, 886 days	16.4	0.9	88.3	2.6
TCGA-23-1107-01A	59 years, female, white, stage:Stage IV, dead, 9 days	0.5	0.7	72.2	3.5
TCGA-23-1109-01A	62 years, female, white, stage:Stage IIIC, dead, 1562 days	20.6	1.1	91.2	10.9
TCGA-23-1110-01A	42 years, female, white, stage:Stage IIIC, alive, 1658 days	3	1.7	94.4	3.6
TCGA-23-1111-01A	63 years, female, white, stage:Stage IIIC, alive, 98 days	10.1	1.2	68.4	9.2
TCGA-23-1113-01A	48 years, female, white, stage:Stage IV, dead, 949 days	3.9	0.8	94.7	7.5
TCGA-23-1116-01A	83 years, female, white, stage:Stage IIIC, dead, 592 days	3.6	0.6	70.3	9
TCGA-23-1118-01A	45 years, female, white, stage:Stage IIIC, alive, 2616 days	3.5	1	72.7	9
TCGA-23-1119-01A	64 years, female, white, stage:Stage IIIC, alive, 3953 days	2.8	0.6	48.1	3.2
TCGA-23-1120-01A	60 years, female, white, stage:Stage IIIC, alive, 130 days	6.1	2	37.7	2.9
TCGA-23-1122-01A	53 years, female, white, stage:Stage IIIC, dead, 1189 days	6.7	2.9	83	3.6
TCGA-23-1123-01A	59 years, female, white, stage:Stage IIIC, dead, 1018 days	2.4	0.8	71	12.3
TCGA-23-1809-01A	63 years, female, white, stage:Stage IIC, alive, 16 days	16.2	0.5	53.3	5.5
TCGA-23-2077-01A	45 years, female, white, stage:Stage IIIC, alive, 3525 days	11.1	0.6	110.5	8.8
TCGA-23-2078-01A	66 years, female, white, stage:Stage IIIC, alive, 2661 days	4.3	2.8	83.2	8.5
TCGA-23-2084-01A	45 years, female, white, stage:Stage IV, dead, 1516 days	6.3	0.5	147.7	8.6
TCGA-24-0966-01A	78 years, female, black or african american, stage:Stage IIIC, alive, 232 days	2	0.8	78.5	4.5
TCGA-24-0968-01A	59 years, female, white, stage:Stage IIIC, dead, 598 days	6.6	1.9	54	6.8
TCGA-24-0979-01A	53 years, female, white, stage:Stage IV, dead, 1264 days	4.2	1.1	91.8	3.6
TCGA-24-0982-01A	77 years, female, white, stage:Stage IIIC, dead, 679 days	6	2.4	36.8	1.3
TCGA-24-1103-01A	50 years, female, black or african american, stage:Stage IIIC, dead, 1646 days	11.8	0.6	25.9	21.1
TCGA-24-1104-01A	56 years, female, white, stage:Stage IV, dead, 1933 days	3.3	1.2	68.8	9
TCGA-24-1105-01A	36 years, female, white, stage:Stage IIIC, dead, 1442 days	4.6	3.2	31.1	2
TCGA-24-1413-01A	51 years, female, white, stage:Stage IIIC, alive, 192 days	7.2	1.2	56.9	5
TCGA-24-1416-01A	34 years, female, white, stage:Stage IV, alive, 194 days	10.7	1.9	73.9	10
TCGA-24-1417-01A	54 years, female, white, stage:Stage IV, alive, 238 days	15.8	1.2	111	11
TCGA-24-1418-01A	68 years, female, white, stage:Stage IIIC, alive, 243 days	4.7	0.7	45	5.7
TCGA-24-1419-01A	62 years, female, white, stage:Stage IIIC, alive, 239 days	13.1	2.4	62.8	10.2
TCGA-24-1422-01A	82 years, female, black or african american, stage:Stage IIIC, dead, 23 days	31.3	0.6	114.8	7.1
TCGA-24-1423-01A	61 years, female, white, stage:Stage IIIC, alive, 190 days	7.2	4.6	39.3	14.5
TCGA-24-1424-01A	67 years, female, white, stage:Stage IIIC, alive, 183 days	6.6	1.5	38	6.5
TCGA-24-1425-01A	45 years, female, white, stage:Stage IIIC, alive, 181 days	10.7	2.4	75.6	13.4
TCGA-24-1426-01A	43 years, female, white, stage:Stage IIIC, alive, 163 days	8	0.7	47	3.9
TCGA-24-1427-01A	58 years, female, stage:Stage IIIC, alive, 147 days	33.6	3.3	53.7	7.1
TCGA-24-1428-01A	50 years, female, white, stage:Stage IIIC, alive, 529 days	3.5	1.1	118.6	10.3
TCGA-24-1430-01A	68 years, female, white, stage:Stage IIIC, dead, 863 days	5.3	1.4	67.5	8.5
TCGA-24-1431-01A	67 years, female, white, stage:Stage IIIC, dead, 583 days	9	0.3	61.8	6.6
TCGA-24-1434-01A	59 years, female, white, stage:Stage IIIC, dead, 568 days	31.7	0.5	81.5	11.9
TCGA-24-1435-01A	57 years, female, white, stage:Stage IIIC, dead, 1324 days	8.1	0.9	178.9	10.1
TCGA-24-1464-01A	70 years, female, white, stage:Stage IIIC, dead, 379 days	12.2	0.5	53	1.5
TCGA-24-1467-01A	51 years, female, white, stage:Stage IIIC, dead, 3224 days	3.6	2.7	64.8	7.6
TCGA-24-1469-01A	71 years, female, white, stage:Stage IIIC, alive, 277 days	6.5	0.9	32.3	2.8
TCGA-24-1471-01A	60 years, female, white, stage:Stage IIIC, alive, 36 days	13.4	0.6	48	3.5
TCGA-24-1474-01A	57 years, female, black or african american, stage:Stage IIIC, dead, 676 days	6.6	1.6	67.8	4.7
TCGA-24-1544-01A	71 years, female, black or african american, stage:Stage IIIC, dead, 820 days	5	0.4	77	6.4
TCGA-24-1546-01A	46 years, female, white, stage:Stage IIIC, dead, 1955 days	5.6	1.2	75.2	29.7
TCGA-24-1549-01A	58 years, female, white, stage:Stage IIIB, dead, 1721 days	5.7	0.9	77.1	3.4
TCGA-24-1550-01A	49 years, female, white, stage:Stage IIIC, dead, 1249 days	33.1	0.3	64.5	12.8
TCGA-24-1551-01A	53 years, female, white, stage:Stage IIIC, dead, 1579 days	30.4	1	180.5	6.2
TCGA-24-1552-01A	77 years, female, white, stage:Stage IIIC, dead, 1259 days	37.6	3.4	97.9	5.8
TCGA-24-1553-01A	53 years, female, white, stage:Stage IIIB, dead, 1767 days	35.3	0.5	65.6	8.1
TCGA-24-1557-01A	49 years, female, white, stage:Stage IIIC, dead, 1213 days	12.9	2.6	69.7	24.3
TCGA-24-1558-01A	73 years, female, white, stage:Stage IIIC, dead, 594 days	28.9	3.9	55.8	3.8
TCGA-24-1560-01A	51 years, female, white, stage:Stage IIIC, dead, 1341 days	2.5	1.2	63.3	10.9
TCGA-24-1562-01A	67 years, female, white, stage:Stage IIIC, dead, 1384 days	7.9	1.7	83.8	5.9
TCGA-24-1563-01A	66 years, female, black or african american, stage:Stage IIIC, dead, 1451 days	11.4	0.6	80.2	9.7
TCGA-24-1565-01A	74 years, female, white, stage:Stage IIIC, dead, 312 days	5.4	1.8	84.7	8.4
TCGA-24-1567-01A	54 years, female, white, stage:Stage IIIB, dead, 524 days	11.9	0.4	78.2	17.2
TCGA-24-1603-01A	53 years, female, white, stage:Stage IIIB, dead, 2742 days	7.5	1.1	72	9.3
TCGA-24-1604-01A	66 years, female, white, stage:Stage IIIC, dead, 2688 days	13.2	1.2	55.6	13
TCGA-24-1616-01A	56 years, female, white, stage:Stage IIIC, dead, 1163 days	16.4	0.6	58	7.1
TCGA-24-1842-01A	49 years, female, white, stage:Stage IIIC, alive, 253 days	8.6	1	111.8	7.9
TCGA-24-1843-01A	66 years, female, white, stage:Stage IIIC, alive, 106 days	6.7	2.2	61.7	9.7
TCGA-24-1844-01A	64 years, female, white, stage:Stage IIIC, alive, 113 days	8.7	1.3	79.3	15.4
TCGA-24-1845-01A	42 years, female, white, stage:Stage IIIC, alive, 116 days	2.6	0.6	51.5	6.7
TCGA-24-1846-01A	45 years, female, stage:Stage IIIC, alive, 133 days	3.1	0.6	103.4	6.2
TCGA-24-1847-01A	45 years, female, white, stage:Stage IV, alive, 343 days	10.3	4	95.4	15.6
TCGA-24-1850-01A	72 years, female, white, stage:Stage IIIC, alive, 168 days	6.3	0.7	83.5	28.5
TCGA-24-1923-01A	51 years, female, white, stage:Stage IIIC, dead, 690 days	19.5	3.7	61	5.8
TCGA-24-1924-01A	65 years, female, white, stage:Stage IIIC, dead, 919 days	4	4.2	131.9	10.3
TCGA-24-1928-01A	77 years, female, white, stage:Stage IIIC, dead, 336 days	11	1.1	89	18
TCGA-24-1930-01A	53 years, female, white, stage:Stage IIIC, dead, 2467 days	13.9	2	84.3	14.9
TCGA-24-2020-01A	67 years, female, white, stage:Stage IIIC, dead, 4624 days	1.1	1.3	57.3	8.8
TCGA-24-2023-01A	54 years, female, white, stage:Stage IIIA, dead, 1364 days	3	1.1	81.6	13.5
TCGA-24-2024-01A	72 years, female, black or african american, stage:Stage IIIC, dead, 1769 days	18.4	1.1	82.4	7.8
TCGA-24-2026-01A	79 years, female, white, stage:Stage IIIC, dead, 1059 days	9.1	5.4	66.1	4.1
TCGA-24-2027-01A	51 years, female, white, stage:Stage IV, dead, 3337 days	12.7	0.9	100.2	9
TCGA-24-2033-01A	87 years, female, white, stage:Stage IIIC, dead, 562 days	10.9	1	46.4	5.7
TCGA-24-2035-01A	65 years, female, white, stage:Stage IIIC, dead, 857 days	4.3	3	72.7	15
TCGA-24-2036-01A	50 years, female, white, stage:Stage IIIA, dead, 1947 days	20.9	6.2	86.4	10.6
TCGA-24-2038-01A	68 years, female, white, stage:Stage IIIA, dead, 1354 days	6.5	0.9	61	11.9
TCGA-24-2254-01A	66 years, female, white, stage:Stage IIIC, dead, 1736 days	20.1	4.6	94	11.7
TCGA-24-2261-01A	76 years, female, white, stage:Stage IIIC, dead, 24 days	7.8	0.9	80	5.6
TCGA-24-2267-01A	58 years, female, white, stage:Stage IIB, dead, 1446 days	13.5	0.9	89.9	7.1
TCGA-24-2271-01A	55 years, female, asian, stage:Stage IIIC, dead, 962 days	53.5	6.4	125.7	11.7
TCGA-24-2280-01A	74 years, female, white, stage:Stage IIIC, alive, 2143 days	10.4	1.9	103.8	4.6
TCGA-24-2281-01A	68 years, female, white, stage:Stage IIA, alive, 1357 days	2.7	1.3	60.7	4.5
TCGA-24-2288-01A	70 years, female, white, stage:Stage IIIC, dead, 25 days	5.3	0.8	57.7	15.2
TCGA-24-2289-01A	68 years, female, white, stage:Stage IV, dead, 2049 days	8.7	0.6	127.1	9.2
TCGA-24-2290-01A	56 years, female, white, stage:Stage IIIC, dead, 1102 days	2.2	1	125.9	8
TCGA-24-2293-01A	47 years, female, white, stage:'--, dead, 506 days	14.3	1.2	91.7	14.5
TCGA-24-2297-01A	56 years, female, white, stage:Stage IIIC, dead, 1699 days	3.9	2.2	72.6	17.3
TCGA-24-2298-01A	55 years, female, white, stage:Stage IIIC, dead, 1620 days	5.7	0.7	46	5.1
TCGA-25-1312-01A	69 years, female, white, stage:Stage IV, dead, 31 days	18.1	0.8	98.6	3.6
TCGA-25-1313-01A	62 years, female, white, stage:Stage IV, dead, 820 days	5	1.1	61.8	9.7
TCGA-25-1315-01A	50 years, female, white, stage:Stage IIIC, dead, 1583 days	13.1	1.3	117	16.7
TCGA-25-1316-01A	55 years, female, white, stage:Stage IIIC, dead, 1279 days	12.9	1	42.8	23
TCGA-25-1317-01A	66 years, female, white, stage:Stage IIIC, dead, 61 days	5.1	1.4	32.7	9.5
TCGA-25-1318-01A	54 years, female, white, stage:Stage IIIC, dead, 1064 days	2.6	0.9	55.3	8.2
TCGA-25-1319-01A	73 years, female, white, stage:Stage IIIC, dead, 1977 days	2.4	2.9	139.8	10.9
TCGA-25-1320-01A	65 years, female, white, stage:Stage IIIC, dead, 1155 days	11.3	1.6	67.1	9.1
TCGA-25-1321-01A	65 years, female, white, stage:Stage IIIC, dead, 1033 days	14.1	0.6	65.8	6.7
TCGA-25-1322-01A	62 years, female, white, stage:Stage IV, dead, 91 days	17.6	1.4	75.9	10.6
TCGA-25-1323-01A	72 years, female, white, stage:Stage IIIC, dead, 395 days	7.6	0.7	80.6	14.7
TCGA-25-1326-01A	61 years, female, white, stage:Stage IIIC, dead, 1249 days	7.4	1.4	70	11.6
TCGA-25-1328-01A	38 years, female, white, stage:Stage IIIC, dead, 2009 days	36	0.9	80.9	14.2
TCGA-25-1329-01A	76 years, female, white, stage:Stage IIIC, dead, 457 days	5.7	1.3	76.9	7.6
TCGA-25-1623-01A	71 years, female, white, stage:Stage IV, dead, 565 days	8.5	0.8	70.6	5.5
TCGA-25-1626-01A	65 years, female, white, stage:Stage IIIC, dead, 518 days	18.2	1.8	81.6	17.1
TCGA-25-1627-01A	73 years, female, white, stage:Stage IIIC, dead, 394 days	3.6	0.5	114.6	16.8
TCGA-25-1628-01A	67 years, female, white, stage:Stage IIIC, dead, 627 days	19.1	2.2	75.1	8
TCGA-25-1630-01A	73 years, female, white, stage:Stage IIIC, dead, 1162 days	19.3	1	96.9	17.2
TCGA-25-1631-01A	73 years, female, white, stage:Stage IIIC, dead, 9 days	2.7	1	90.2	17.3
TCGA-25-1632-01A	68 years, female, white, stage:Stage IV, dead, 1799 days	2.3	2.5	112	12.4
TCGA-25-1633-01A	64 years, female, white, stage:Stage IIIC, dead, 1891 days	56.2	0.9	58.3	12
TCGA-25-1634-01A	75 years, female, white, stage:Stage IIIC, dead, 1091 days	13.4	0.7	50.1	2.1
TCGA-25-1635-01A	71 years, female, white, stage:Stage IIIC, dead, 1583 days	10.6	0.8	116.9	11.7
TCGA-25-1870-01A	59 years, female, white, stage:Stage IIIC, dead, 455 days	4.4	2.5	50	16.8
TCGA-25-1877-01A	81 years, female, white, stage:Stage IIIC, dead, 730 days	8.3	0.5	76.5	11.3
TCGA-25-2042-01A	60 years, female, american indian or alaska native, stage:Stage IIIC, dead, 396 days	8.6	2	73.2	9.9
TCGA-25-2392-01A	75 years, female, white, stage:Stage IV, dead, 31 days	8.3	1.3	61.7	14.4
TCGA-25-2393-01A	81 years, female, white, stage:Stage IIIC, dead, 1157 days	2.5	1	76.9	1.8
TCGA-25-2396-01A	71 years, female, white, stage:Stage IIIC, dead, 92 days	15	0.9	48.4	8.6
TCGA-25-2398-01A	71 years, female, white, stage:Stage IIIC, dead, 1369 days	11.3	0.6	111.3	12.7
TCGA-25-2399-01A	80 years, female, white, stage:Stage IIIC, dead, 608 days	11.1	1.1	77.5	6.7
TCGA-25-2400-01A	76 years, female, white, stage:Stage IIIC, dead, 1278 days	1.4	0.8	51.4	30.7
TCGA-25-2401-01A	64 years, female, white, stage:Stage IIIC, dead, 90 days	10.5	0.9	89.4	11.7
TCGA-25-2404-01A	38 years, female, american indian or alaska native, stage:Stage IIIC, dead, 883 days	9.5	2.5	78.7	6.4
TCGA-25-2409-01A	71 years, female, white, stage:Stage IV, dead, 821 days	12.1	1.2	92.9	14.2
TCGA-29-1688-01A	39 years, female, white, stage:Stage IIIC, dead, 2400 days	4.7	2.1	80.8	11.4
TCGA-29-1690-01A	66 years, female, white, stage:Stage IIIC, dead, 1448 days	5.2	0.4	60.7	24.5
TCGA-29-1691-01A	51 years, female, white, stage:Stage IIIC, dead, 1470 days	8.2	1	102.3	12
TCGA-29-1693-01A	72 years, female, white, stage:Stage IIIC, alive, 3096 days	10.3	0.6	85.7	7
TCGA-29-1694-01A	45 years, female, white, stage:Stage IIIC, dead, 1187 days	11.2	1.9	90.9	16.4
TCGA-29-1695-01A	62 years, female, white, stage:Stage IIIC, dead, 1229 days	4.5	1.1	82.6	19.5
TCGA-29-1696-01A	43 years, female, white, stage:Stage IIIC, dead, 1032 days	4	0.7	87.3	24.9
TCGA-29-1697-01A	62 years, female, white, stage:Stage IIIC, dead, 949 days	5.3	1.2	59.1	14
TCGA-29-1701-01A	56 years, female, white, stage:Stage IIIC, dead, 515 days	4.8	3.8	67.1	18.3
TCGA-29-1703-01A	56 years, female, black or african american, stage:Stage IIIC, dead, 1815 days	1.8	0.8	83.9	6.6
TCGA-29-1705-01A	47 years, female, white, stage:Stage IIIC, dead, 555 days	5.5	0.7	61.4	17.8
TCGA-29-1710-01A	54 years, female, white, stage:Stage IIIC, dead, 951 days	7.3	0.5	88.9	13.2
TCGA-29-1711-01A	45 years, female, black or african american, stage:Stage IIIC, alive, 1053 days	4.1	0.8	82	11
TCGA-29-1761-01A	80 years, female, asian, stage:Stage IIIC, dead, 528 days	1.9	0.7	44.6	25.6
TCGA-29-1762-01A	59 years, female, white, stage:Stage IV, dead, 2634 days	10.2	0.8	107.6	25.4
TCGA-29-1763-01A	43 years, female, black or african american, stage:Stage IIC, alive, 2032 days	18.2	1.1	117.1	5.6
TCGA-29-1766-01A	74 years, female, white, stage:Stage IIIC, dead, 1199 days	8.4	0.4	51.3	8.1
TCGA-29-1768-01A	50 years, female, white, stage:Stage IV, dead, 952 days	5	0.2	108.3	10.1
TCGA-29-1769-01A	40 years, female, white, stage:Stage IIIC, alive, 699 days	5.7	0.4	66.9	9.6
TCGA-29-1770-01A	54 years, female, white, stage:Stage IIIC, alive, 741 days	17.9	7.8	102.9	8.7
TCGA-29-1774-01A	82 years, female, white, stage:Stage IIIC, alive, 527 days	17.8	3	35.1	23.8
TCGA-29-1776-01A	63 years, female, black or african american, stage:Stage IIIC, alive, 360 days	4.7	0.8	55.1	4.9
TCGA-29-1777-01A	47 years, female, white, stage:Stage IIIC, alive, 374 days	15.5	0.3	72.6	13
TCGA-29-1778-01A	77 years, female, white, stage:Stage IIIC, alive, 454 days	7.2	1.9	65.6	3.9
TCGA-29-1781-01A	69 years, female, white, stage:Stage IIIC, alive, 255 days	3.7	0.4	106.7	14.9
TCGA-29-1783-01A	58 years, female, white, stage:Stage IIIC, alive, 220 days	20.6	0.6	88	9.9
TCGA-29-1784-01A	55 years, female, white, stage:Stage IIIC, alive, 163 days	2.6	2.7	131.4	9.5
TCGA-29-1785-01A	55 years, female, white, stage:Stage IIIC, dead, 1104 days	4	1.8	65.1	24.3
TCGA-29-2414-01A	75 years, female, white, stage:Stage IIIC, dead, 2621 days	3	0.5	40.2	2.4
TCGA-29-2425-01A	60 years, female, white, stage:Stage IIIC, alive, 1977 days	8.1	0.5	63.4	2.5
TCGA-29-2427-01A	60 years, female, white, stage:Stage IIIC, alive, 1900 days	3.6	1.4	56	8.2
TCGA-29-2428-01A	58 years, female, white, stage:Stage IIIC, alive, 1372 days	1.6	2.2	97.4	7.2
TCGA-29-A5NZ-01A	66 years, female, black or african american, stage:Stage IIIC, dead, 1088 days	18.7	1.4	116.2	7.7
TCGA-30-1714-01A	68 years, female, white, stage:Stage IV, dead, 1158 days	1.8	0.7	36.3	13.4
TCGA-30-1718-01A	44 years, female, white, stage:Stage IIIC, dead, 1579 days	13.8	0.7	51.2	23.4
TCGA-30-1853-01A	58 years, female, white, stage:Stage IIIC, dead, 1103 days	13.2	1.9	43.2	4.7
TCGA-30-1857-01A	64 years, female, white, stage:Stage IV, dead, 8 days	6.5	0.9	30.4	4.3
TCGA-30-1860-01A	58 years, female, white, stage:Stage IIIC, dead, 1366 days	5.9	0.4	132.5	9.7
TCGA-30-1861-01A	74 years, female, white, stage:Stage IIIC, dead, 1058 days	21.1	0.8	72.4	6.9
TCGA-30-1862-01A	65 years, female, white, stage:Stage IV, dead, 186 days	17.7	1.3	67.4	11
TCGA-30-1866-01A	61 years, female, white, stage:Stage IV, dead, 1114 days	4.1	0.7	46.4	8.9
TCGA-30-1891-01A	61 years, female, white, stage:Stage IIIC, dead, 914 days	8.1	0.2	82.1	10.1
TCGA-30-1892-01A	52 years, female, white, stage:Stage IIIC, dead, 1484 days	11.4	3.1	48.6	19
TCGA-31-1944-01A	47 years, female, white, stage:Stage IIIC, alive, 1386 days	3.6	2.1	60.7	9.2
TCGA-31-1946-01A	30 years, female, stage:Stage IIIC, alive, 918 days	11.9	1.9	121.3	15.7
TCGA-31-1950-01A	76 years, female, white, stage:Stage IIIC, alive, 571 days	5.1	8.4	87.8	2.3
TCGA-31-1951-01A	58 years, female, white, stage:Stage IIIC, alive, 684 days	6	1.2	83.6	8.8
TCGA-31-1953-01A	52 years, female, asian, stage:Stage IIIC, alive, 204 days	12.7	2.7	114.3	9.9
TCGA-31-1956-01A	60 years, female, white, stage:Stage IIIB, alive, 1342 days	12.8	0.9	99	15.7
TCGA-31-1959-01A	49 years, female, white, stage:Stage IV, alive, 67 days	12.7	1	136	26.7
TCGA-36-1568-01A	52 years, female, stage:Stage IIIC, alive, 875 days	3.4	1.2	59.2	18.5
TCGA-36-1569-01A	52 years, female, white, stage:Stage IIIC, alive, 885 days	19.3	0.7	65.2	8.5
TCGA-36-1570-01A	49 years, female, white, stage:Stage IIIC, alive, 655 days	8.7	0.7	112.8	12.1
TCGA-36-1571-01A	53 years, female, white, stage:Stage IIIB, dead, 695 days	2.6	0.6	81.7	8.9
TCGA-36-1574-01A	48 years, female, asian, stage:Stage IIIC, alive, 686 days	16.5	8.6	86.1	8
TCGA-36-1576-01A	76 years, female, stage:Stage IIIC, alive, 915 days	9.2	1	79.8	16.3
TCGA-36-1577-01A	43 years, female, asian, stage:Stage IIC, alive, 783 days	11.6	0.4	217.9	36.7
TCGA-36-1580-01A	82 years, female, stage:Stage IIIC, dead, 737 days	10.1	0.6	125.2	6.1
TCGA-36-1581-01A	63 years, female, white, stage:Stage IIC, alive, 751 days	4.1	2.7	76.6	11.7
TCGA-57-1582-01A	50 years, female, white, stage:Stage IIIC, dead, 731 days	2.8	2.9	109.7	11.4
TCGA-57-1583-01A	57 years, female, black or african american, stage:Stage IIIC, dead, 346 days	3.6	0.9	32.4	3.1
TCGA-57-1584-01A	47 years, female, white, stage:Stage IIIC, alive, 643 days	2.9	1.2	169.5	11.7
TCGA-57-1585-01A	57 years, female, white, stage:Stage IIIC, dead, 53 days	9.2	2.3	107.9	10.5
TCGA-57-1586-01A	66 years, female, white, stage:Stage IIIC, alive, 679 days	4.8	2.2	44.3	4.9
TCGA-57-1993-01A	56 years, female, white, stage:Stage IIIC, alive, 763 days	22.1	5.1	93.3	18.8
TCGA-57-1994-01A	63 years, female, white, stage:'--, alive, 761 days	9.1	5.1	73.5	11.3
TCGA-59-2348-01A	59 years, female, white, stage:Stage IIIC, alive, 5481 days	2.6	0.7	67.7	12.3
TCGA-59-2350-01A	44 years, female, stage:Stage IV, dead, 679 days	11.7	0.9	68.5	18.4
TCGA-59-2351-01A	51 years, female, white, stage:Stage IIIC, alive, 3532 days	5.5	0.9	51	9.7
TCGA-59-2352-01A	78 years, female, white, stage:Stage IIIC, dead, 286 days	52.8	0.7	45.7	11.2
TCGA-59-2354-01A	63 years, female, white, stage:Stage IIIC, dead, 1046 days	8.2	4.8	90.7	20
TCGA-59-2355-01A	58 years, female, white, stage:Stage IV, dead, 65 days	4.4	3.6	86.1	11.7
TCGA-59-2363-01A	40 years, female, asian, stage:Stage IIIA, alive, 165 days	8.4	0.4	60.1	12.6
TCGA-59-A5PD-01A	55 years, female, black or african american, stage:Stage IC, dead, 624 days	0.7	1.4	36.6	4.6
TCGA-5X-AA5U-01A	61 years, female, black or african american, stage:Stage IIC, alive, 361 days	9.2	1.9	90.1	4.7
TCGA-61-1721-01A	38 years, female, white, stage:Stage IV, alive, 338 days	12.3	3.7	53.3	23.3
TCGA-61-1724-01A	47 years, female, white, stage:Stage IIIC, dead, 637 days	3.3	11.2	87.5	17
TCGA-61-1725-01A	40 years, female, white, stage:Stage IIIC, alive, 956 days	7.8	1	129.8	10.5
TCGA-61-1728-01A	59 years, female, white, stage:Stage IV, alive, 848 days	6.6	1.6	93.2	16.4
TCGA-61-1733-01A	71 years, female, white, stage:Stage IIIC, alive, 967 days	38.7	1	106.8	14.8
TCGA-61-1737-01A	42 years, female, white, stage:Stage IV, alive, 1364 days	7	0.5	119	14
TCGA-61-1738-01A	60 years, female, black or african american, stage:Stage IIIC, dead, 1089 days	17.5	0.2	130.3	57.4
TCGA-61-1741-01A	76 years, female, white, stage:Stage IIIB, dead, 1024 days	11.4	1.7	56.5	4.7
TCGA-61-1900-01A	51 years, female, black or african american, stage:Stage IIIB, alive, 176 days	10.6	1	166.5	17.1
TCGA-61-1907-01A	63 years, female, white, stage:Stage IIIC, alive, 952 days	15	9.3	137.6	12.6
TCGA-61-1910-01A	56 years, female, white, stage:Stage IIC, alive, 1127 days	1.3	3.2	64.5	11.8
TCGA-61-1911-01A	55 years, female, white, stage:Stage IIA, alive, 1293 days	3.3	7.8	48.8	12.6
TCGA-61-1914-01A	65 years, female, stage:Stage IIIC, alive, 1722 days	9.6	0.5	71.1	29.9
TCGA-61-1918-01A	45 years, female, white, stage:Stage IV, dead, 479 days	6.8	3	83.6	22.5
TCGA-61-1919-01A	58 years, female, white, stage:Stage IIIC, dead, 1161 days	6	0.8	68.4	9.7
TCGA-61-1995-01A	43 years, female, white, stage:Stage IIIC, alive, 61 days	50.9	2.1	144.5	8
TCGA-61-1998-01A	48 years, female, white, stage:Stage IIIC, alive, 168 days	6.6	0.9	75	17.4
TCGA-61-2000-01A	67 years, female, white, stage:Stage IIIC, alive, 441 days	6.6	3.2	83.4	4.8
TCGA-61-2002-01A	46 years, female, white, stage:Stage IIIC, alive, 547 days	9.1	2	119.5	10.5
TCGA-61-2003-01A	53 years, female, white, stage:Stage IIIC, alive, 122 days	14.6	2.5	87	15
TCGA-61-2008-01A	40 years, female, asian, stage:Stage IIC, alive, 932 days	6.8	1.4	70	22.9
TCGA-61-2009-01A	65 years, female, white, stage:Stage IIIC, alive, 1212 days	9	3.1	62.1	54.2
TCGA-61-2012-01A	81 years, female, white, stage:Stage IIC, alive, 932 days	3.1	0.7	70.4	13.7
TCGA-61-2088-01A	51 years, female, white, stage:Stage IIIC, alive, 145 days	4.2	14.2	88	4.2
TCGA-61-2092-01A	57 years, female, white, stage:Stage IIIC, alive, 1573 days	1.8	0.8	102.6	67
TCGA-61-2097-01A	71 years, female, white, stage:Stage IIC, alive, 1844 days	5.9	1.7	80.9	16.2
TCGA-61-2098-01A	62 years, female, white, stage:Stage IIIC, alive, 1993 days	16.1	1.4	62.5	19.1
TCGA-61-2101-01A	55 years, female, white, stage:Stage IIIC, dead, 1688 days	3.8	0.9	49.2	11.2
TCGA-61-2102-01A	74 years, female, white, stage:Stage IIIC, dead, 197 days	11.9	7	74.5	17.4
TCGA-61-2104-01A	53 years, female, white, stage:Stage IIC, alive, 2338 days	5.3	1	74.1	3.7
TCGA-61-2109-01A	40 years, female, white, stage:Stage IIIC, dead, 629 days	24.4	3.7	122.6	9
TCGA-61-2110-01A	56 years, female, white, stage:Stage IIIC, dead, 1354 days	14.3	1.6	61.5	7.3
TCGA-61-2111-01A	61 years, female, white, stage:Stage IV, alive, 3825 days	2.2	1.3	141.3	27.9
TCGA-61-2113-01A	53 years, female, white, stage:Stage IIC, dead, 676 days	4.7	1	81.2	6.8
TCGA-OY-A56Q-01A	78 years, female, black or african american, stage:Stage IIA, alive, 576 days	1.1	2.9	44.9	1.4
TCGA-VG-A8LO-01A	55 years, female, black or african american, stage:Stage IV, dead, 24 days	1.6	2.5	72.4	10.9
TCGA-WR-A838-01A	72 years, female, black or african american, stage:Stage IIIC, dead, 304 days	4.9	1.3	105.1	2.9
Survival analysis
Best expressio cut off	Based on the FPKM value of each gene, patients were classified into two groups and association between prognosis (survival) and gene expression (FPKM) was examined. The best expression cut-off refers the FPKM value that yields maximal difference with regard to survival between the two groups at the lowest log-rank P-value. Best expression cut-off was selected based on survival analysis	8.15	2.15	51.53	5.62
Median expression	Median follow up time refers to the median time (years) after diagnosis with this type of cancer, based on clinical data from all patients in this dataset	6.56	1.03	72.45	9.02
Median follow up time		2.67	2.67	2.67	2.67
P score		0.0014	0.094	0.026	0.043
5-year survival high		0.25	0.2	0.29	0.27
5-year survival low		0.34	0.33	0.38	0.43
* These data are collected from TCGA where transcriptomics data was available from 349 females with ovarian serous cystadenocarcinoma. 132 of the patients were still alive at the time of data collection.
