# Supplementary material for: Hyaluronan catabolism supports the peritoneal disseminated metastasis of cancer through the glucuronic acid pathway
Source: Research Square preprint supplement (doi:10.21203/rs.3.rs-7691213/v1), 2025-11-19
Supplement: Supplementary file 6 [file d4f429ae353f07d5414787d1.xlsx]

## Sheet: Sheet1
Supplementary Table 3：The metablites content changes under HA supplementation
Name	unit	HMDB	HMDB_Disease	KEGG	2.5mM			2.5mM+HA
Glucuronic acid	content(ng/cell)	HMDB0000127	--	C00191	1.31001e-05	1.65526e-05	1.43064e-05	1.68649e-05	1.63652e-05	1.52952e-05
D-Xylulose 5-phosphate	content(ng/cell)	HMDB0000868	--	C00231	0.000115715	0.00012051	0.000122137	0.000109315	0.000127438	0.000142712
6-Phosphogluconic acid	content(ng/cell)	HMDB0001316	114500 (Colorectal cancer) 181500 (Schizophrenia) 104300 (Alzheimer's disease) 600274 (Frontotemporal dementia) 219700 (Cystic fibrosis) 610247 (Eosinophilic esophagitis) 203740 (2-Ketoglutarate dehydrogenase complex deficiency) 220500 (Deafness, Onychodystrophy, Osteodystrophy, Mental Retardation, a0 Seizures Sy0rome)	C00345	1.20223e-06	1.41363e-06	1.57326e-06	7.04294e-06	8.39491e-06	8.15798e-06
Ribose 5-phosphate	content(ng/cell)	HMDB0001548	266600 (Crohn's disease) 104300 (Alzheimer's disease) 600274 (Frontotemporal dementia)	C03736	1.33588e-05	3.28609e-05	3.12912e-05	9.29233e-06	1.00372e-05	2.41179e-05
Sedoheptulose 7-phosphate	content(ng/cell)	HMDB0001068	606003 (Transaldolase deficiency) 104300 (Alzheimer's disease) 600274 (Frontotemporal dementia)	C05382	1.71714e-06	1.47675e-06	1.81839e-06	4.18483e-06	5.17354e-06	3.4523e-06
D-Erythrose 4-phosphate	content(ng/cell)	HMDB0001321	--	C00279	9.06361e-06	1.00996e-05	1.22985e-05	2.19891e-05	2.74652e-05	3.03804e-05
Thiamine diphosphate	content(ng/cell)	HMDB0001372	104300 (Alzheimer's disease)	C00068	9.14219e-06	8.38104e-06	7.67735e-06	6.50599e-06	6.46608e-06	6.12325e-06
D-Glucose 1-phosphate	content(ng/cell)	HMDB0001586	104300 (Alzheimer's disease) 600274 (Frontotemporal dementia)	C00103	1.18623e-05	9.00998e-06	9.70161e-06	2.43647e-05	3.38692e-05	3.26846e-05
Glucose 6-phosphate	content(ng/cell)	HMDB0001401	114500 (Colorectal cancer) 104300 (Alzheimer's disease) 600274 (Frontotemporal dementia) 610247 (Eosinophilic esophagitis)	C00092	3.90871e-06	3.59512e-06	4.33937e-06	1.4886e-05	1.52104e-05	1.98327e-05
Dihydroxyacetone phosphate	content(ng/cell)	HMDB0001473	606003 (Transaldolase deficiency) 104300 (Alzheimer's disease) 600274 (Frontotemporal dementia)	C00111	3.38575e-05	2.54857e-05	2.3447e-05	1.79506e-05	1.12878e-05	1.45491e-05
3-Phospho-D-glycerate	content(ng/cell)	HMDB0060180	--	C00197	1.49677e-05	1.69533e-05	1.86538e-05	9.13741e-06	1.02276e-05	9.71255e-06
2-Phospho-D-glycerate	content(ng/cell)	HMDB0003391	610247 (Eosinophilic esophagitis)	C00631	1.44194e-05	1.14691e-05	1.28438e-05	6.38148e-06	6.87848e-06	6.7643e-06
Phosphoenolpyruvic acid	content(ng/cell)	HMDB0000263	104300 (Alzheimer's disease) 600274 (Frontotemporal dementia)	C00074	2.83914e-06	2.58335e-06	2.55067e-06	1.50035e-06	1.59776e-06	1.55859e-06
ATP	content(ng/cell)	HMDB0000538	105800 (Subarachnoid hemorrhage) 601367 (Stroke)	C00002	1.18395e-05	1.24967e-05	1.37992e-05	2.62662e-05	1.72851e-05	1.86993e-05
Lactic acid	content(ng/cell)	HMDB0000190	222100 (Diabetes mellitus type 1) 530000 (Chronic progressive external ophthalmoplegia a0 Kearns-Sayre sy0rome) 260350 (Pancreatic cancer) 181500 (Schizophrenia) 272300 (Sulfite oxidase deficiency, ISOLATED) 203740 (2-Ketoglutarate dehydrogenase complex deficiency) 246450 (3-Hydroxy-3-methylglutaryl-CoA lyase deficiency) 605911 (3-Hydroxy-3-Methylglutaryl-CoA Synthase Deficiency) 300438 (2-Methyl…	C00186	1.55114e-06	1.55114e-06	1.55114e-06	8.5962e-06	5.32819e-06	5.10316e-06
Succinic Acid	content(ng/cell)	HMDB0000254	271900 (Canavan disease) 104300 (Alzheimer's disease) 266600 (Crohn's disease) 138900 (Gout) 211980 (Lung Cancer) 610247 (Eosinophilic esophagitis) 114500 (Colorectal cancer) 600721 (D-2-hydroxyglutaric aciduria) 248360 (Malonyl-Coa decarboxylase deficiency) 606812 (Fumarase deficiency) 203740 (2-Ketoglutarate dehydrogenase complex deficiency) 616299 (Lipoyltransferase 1 Deficiency)	C00042	4.10734e-06	4.50303e-06	4.34707e-06	2.8493e-06	2.93608e-06	2.95112e-06
Malate	content(ng/cell)	HMDB0000156	114500 (Colorectal cancer) 181500 (Schizophrenia) 104300 (Alzheimer's disease) 600274 (Frontotemporal dementia) 219700 (Cystic fibrosis) 610247 (Eosinophilic esophagitis) 203740 (2-Ketoglutarate dehydrogenase complex deficiency) 220500 (Deafness, Onychodystrophy, Osteodystrophy, Mental Retardation, a0 Seizures Sy0rome)	C00149	0.000641531	0.000512919	0.000539355	0.000789561	0.000700934	0.000725655
NAD+	content(ng/cell)	HMDB0000902	--	C00003	1.66854e-05	1.39978e-05	1.82482e-05	2.63134e-05	2.78416e-05	2.8415e-05
AMP	content(ng/cell)	HMDB0000045	266600 (Crohn's disease) 114500 (Colorectal cancer) 104300 (Alzheimer's disease) 600274 (Frontotemporal dementia)	C00020	6.03674e-06	6.93705e-06	8.86837e-06	3.77403e-05	2.0933e-05	2.32397e-05
ADP	content(ng/cell)	HMDB0001341	105800 (Subarachnoid hemorrhage) 601367 (Stroke) 610247 (Eosinophilic esophagitis)	C00008	0.000119702	0.000126999	0.00012894	0.000168762	0.000161959	0.000159002
cAMP	content(ng/cell)	HMDB0000058	139393 (Idiopathic polyneuritis) 266600 (Crohn's disease)	C00575	1.16261e-06	1.05378e-06	1.15739e-06	1.39689e-06	1.41781e-06	1.46761e-06
GDP	content(ng/cell)	HMDB0001201	105800 (Subarachnoid hemorrhage) 601367 (Stroke)	C00035	2.41672e-05	2.57628e-05	2.46023e-05	3.6079e-05	3.48593e-05	3.44264e-05
GMP	content(ng/cell)	HMDB0001397	--	C00144	1.28417e-05	1.33872e-05	1.16932e-05	2.85393e-05	2.27329e-05	2.41002e-05
dGDP	content(ng/cell)	HMDB0000960	--	C00361	5.39746e-06	5.68376e-06	5.57181e-06	5.45696e-06	4.04057e-06	4.4256e-06
dTMP	content(ng/cell)	HMDB0001227	114500 (Colorectal cancer)	C00364	1.18801e-05	1.02649e-05	8.19741e-06	1.05107e-05	9.166e-06	8.23201e-06
