# Supplementary material for: Hyaluronan catabolism supports the peritoneal disseminated metastasis of cancer through the glucuronic acid pathway
Source: Research Square preprint supplement (doi:10.21203/rs.3.rs-7691213/v1), 2025-11-19
Supplement: Supplementary file 7 [file f6724f10852f099728e9c160.xlsx]

## Sheet: Sheet1
Supplementary Table 6. The list of antibodies
Antibody	Company （Cat No.）	Application*
Anti-LAYN antibody	Proteintech, 20535-1-AP	WB (1:1000)
		IHC(1:100)
		IF(1:200)
Anti-V5 antibody	Invitrogen, R96025	WB (1:2500)
		PLA(1:100)
Anti-LAMP1 antibody	Santa Cruz, sc-20011	IF (1:200)
Anti-EEA1 antibody	Cell Signaling Technology (CST), 3288	WB (1:1000)
Anti-RAB11 antibody	CST, 5589	WB (1:1000)
Anti-Flag antibody	Proteintech, 66008-4-Ig	WB (1:1000)
		PLA(1:100)
Anti-HYAL1 antibody	Invitrogen, PA5-79420	WB (1:1000)
		IF(1:200)
		IHC (1:400)
Anti-CRYL1 antibody	Immunoway, YT6665	WB (1:5000)
		IHC (1:500)
Anti-AKR1A1 antibody	Zenbio , 160848	IHC (1:800)
Anti-RHOU antibody	Abclonal, A17195	WB (1:1000)
Anti-BrdU antibody	Proteintech, 66241-1-Ig	IF (1:200)
Anti-mcherry antibody	Proteintech, 26765-1-AP	IP (1:200)
		WB (1:1000)
Anti-β-actin antibody	Affinity, AF7018	WB (1:1000)
Anti-CD44 antibody	Proteintech, 15675-1-AP	WB (1:1000)
Anti-CREB antibody	Proteintech, 12208-1-AP	WB (1:1000)
Anti-p-CREB antibody	Merck, 05-667	IF(1:100)
	Proteintech, 28792-1-AP	WB (1:1000)
APC anti-mouse CD45 Antibody	Biolegend, 147707	FC(1:100)
Anti-Ki-67 antibody	Servicebio, GB111499-100	IHC(1:800)
* IF-immunofluorescent staining; WB-western blot; IP-immunoprecipitation; IHC-immunohistochemistry; FC-Flow cytometry
